# Supplementary material for: An efficient synthesis of carbazoles from PtCl2-catalyzed cyclization of 1-(indol-2-yl)-2,3-allenols
Source: Royal Society of Chemistry journal article supplement (doi:10.1039/b909649c), 2009-01-01

**An Efficient Synthesis of Carbazoles from PtCl<sub>2</sub>-Catalyzed Cyclization of  
1-(Indol-2-yl)-2,3-allenols**

Wangqing Kong, Chunling Fu, and Shengming Ma<sup>\*</sup>

Laboratory of Molecular Recognition and Synthesis, Department of Chemistry,  
Zhejiang University, Hangzhou 310027, Zhejiang, People's Republic of China

Fax: (+86) 21-62609305

E-mail: [masm@mail.sioc.ac.cn](mailto:masm@mail.sioc.ac.cn)

**Supporting Information**

|                                                                                  |     |
|----------------------------------------------------------------------------------|-----|
| Experimental details and analytical data for all the products listed in the text | S2  |
| <sup>1</sup> H and <sup>13</sup> C NMR spectra of all compounds                  | S34 |

## 1. Synthesis of Allenic Alcohols 1a-1f

### (1) 1-(1-Ethyl-1*H*-indol-2-yl)nona-2,3-dien-1-ol (1a)<sup>[1]</sup>

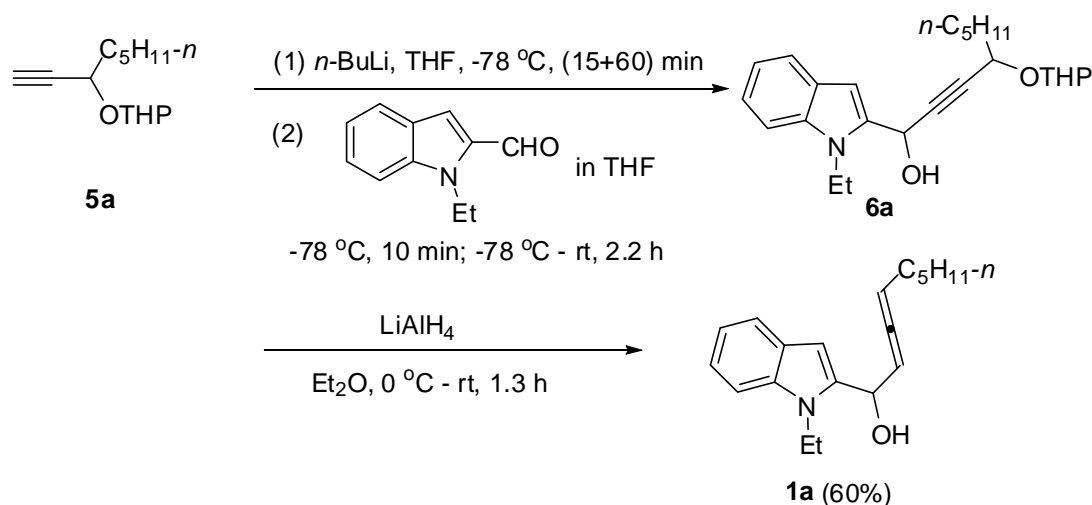

**Typical procedure:** To a solution of **5a**<sup>[2]</sup> (2.5010 g, 12 mmol) in THF (25 mL) was slowly added dropwise *n*-butyl lithium (5.8 mL, 2.5 M in hexane, 14.5 mmol) at -78 °C with stirring under a nitrogen atmosphere within 15 min. After being stirred for 1 h at -78 °C, a solution of 1-ethyl-1*H*-indole-2-carbaldehyde (2.4801 g, 14.3 mmol) in anhydrous THF (5 mL) was added dropwise at this temperature within 10 min. Then the mixture was allowed to warm up to room temperature, quenched with the addition of saturated aqueous NH<sub>4</sub>Cl (20 mL), and extracted with diethyl ether (25 mL×3). The ether layer was dried over anhydrous Na<sub>2</sub>SO<sub>4</sub>, filtrated, and concentrated in vacuo. The product **6a** was then used without further purification.

To an ice-cold suspension of LiAlH<sub>4</sub> (0.5101 g, 13.4 mmol) in dry Et<sub>2</sub>O (15 mL) under N<sub>2</sub> was added dropwise a solution of **6a** prepared in the previous step in Et<sub>2</sub>O (5 mL) within 10 min. Then the mixture was allowed to warm up to room temperature. After being stirred at rt for 1.1 h, the resulting mixture was quenched with a saturated aqueous solution of NH<sub>4</sub>Cl. The aqueous layer was extracted with diethyl ether (15

mL×3). The combined organic layers were washed with water and dried over anhydrous Na<sub>2</sub>SO<sub>4</sub>. Filtration, evaporation, and column chromatography on silica gel (petroleum ether/ethyl acetate = 40/1~15/1) afforded **1a** (2.0376 g, combined yield from **5a** to **1a** is 60%): a pall yellow solid, m.p. 45-46 °C (CH<sub>2</sub>Cl<sub>2</sub>/*n*-hexane); <sup>1</sup>H NMR (300 MHz, CDCl<sub>3</sub>) δ 7.59 (d, *J* = 7.8 Hz, 1H), 7.34 (d, *J* = 8.4 Hz, 1H), 7.21 (td, *J* = 7.8 and 1.2 Hz, 1H), 7.14-7.04 (m, 1H), 6.52-6.45 (m, 1H), 5.67-5.56 (m, 1H), 5.52-5.36 (m, 2H), 4.45-4.17 (m, 2H), 2.16-1.95 (m, 3H), 1.50-1.36 (m, 5H), 1.35-1.20 (m, 4H), 0.96-0.75 (m, 3H); IR (neat) ν (cm<sup>-1</sup>) 3383, 3056, 2957, 2929, 2856, 1963, 1611, 1534, 1461, 1412, 1379, 1347, 1316, 1265, 1220, 1170, 1122, 1053, 1014; MS (70 ev, EI) *m/z* (%) 283 (M<sup>+</sup>, 2.04), 265 (M<sup>+</sup>-H<sub>2</sub>O, 69.04), 208 (100); Elemental analysis calcd (%) for C<sub>19</sub>H<sub>25</sub>NO: C, 80.52; H, 8.89; N, 4.94; Found: C, 80.69, H, 8.79; N, 5.02.

The following compounds **1b-1f** were prepared according to this procedure.

**(2) 1-(1-Ethyl-1*H*-indol-2-yl)penta-2,3-dien-1-ol (1b)** <sup>[1]</sup>

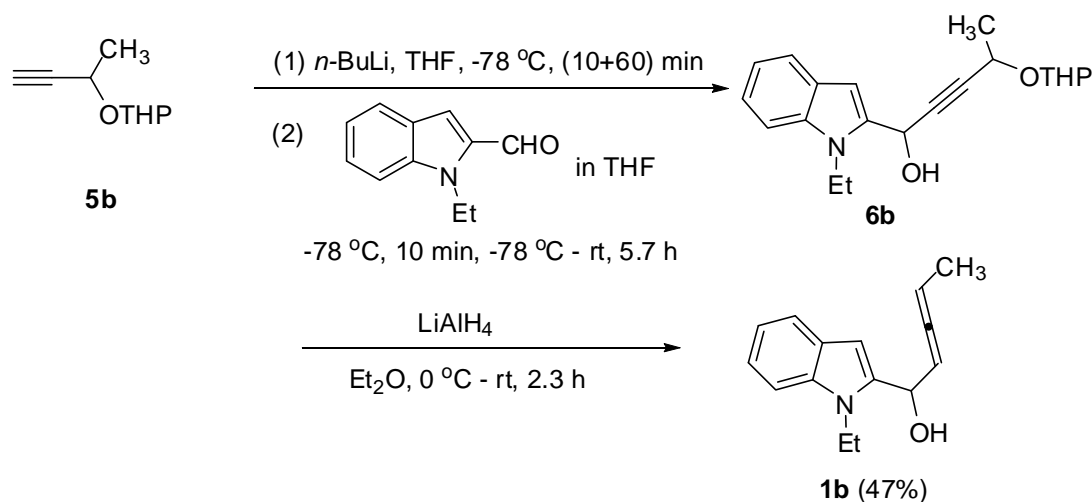

The reaction of **5b** <sup>[2]</sup> (3.0912 g, 20 mmol), *n*-BuLi (8.0 mL, 2.5 M in hexane, 20

mmol), and 1-ethyl-1*H*-indole-2-carbaldehyde (3.5014 g, 20 mmol) in THF (40 mL) afforded **6b**, which was then used without further purification.

The reaction of **6b** (5.8120 g, 18 mmol) and LiAlH<sub>4</sub> (0.7612 g, 20 mmol) in Et<sub>2</sub>O (30 mL) afforded **1b** (2.1416 g, combined yield from **5b** to **1b** is 47%) (petroleum ether/ethyl acetate = 15/1~5/1): a pall yellow solid, m.p. 70-71 °C (CH<sub>2</sub>Cl<sub>2</sub>/*n*-hexane); <sup>1</sup>H NMR (300 MHz, CDCl<sub>3</sub>) δ 7.65-7.55 (m, 1H), 7.33 (dd, *J* = 8.1 and 0.6 Hz, 1H), 7.26-7.16 (m, 1H), 7.14-7.04 (m, 1H), 6.53-6.47 (m, 1H), 5.65-5.52 (m, 1H), 5.50-5.34 (m, 2H), 4.45-4.17 (m, 2H), 2.15-2.05 (m, 1H), 1.82-1.67 (m, 3H), 1.40 (t, *J* = 7.2 Hz, 3H); IR (neat) ν (cm<sup>-1</sup>) 3379, 3057, 2976, 2926, 1969, 1611, 1534, 1460, 1408, 1371, 1347, 1316, 1269, 1220, 1165, 1126, 1078, 1049, 1013; MS (70 ev, EI) *m/z* (%) 228 (M<sup>+</sup>+1, 8.08), 227 (M<sup>+</sup>, 48.42), 194 (100); Elemental analysis calcd (%) for C<sub>15</sub>H<sub>17</sub>NO: C, 79.26; H, 7.54; N, 6.16; Found: C, 79.31, H, 7.46; N, 5.91.

### (3) 2-(1-Ethyl-1*H*-indol-2-yl)undeca-3,4-dien-2-ol (**1c**)<sup>[1]</sup>

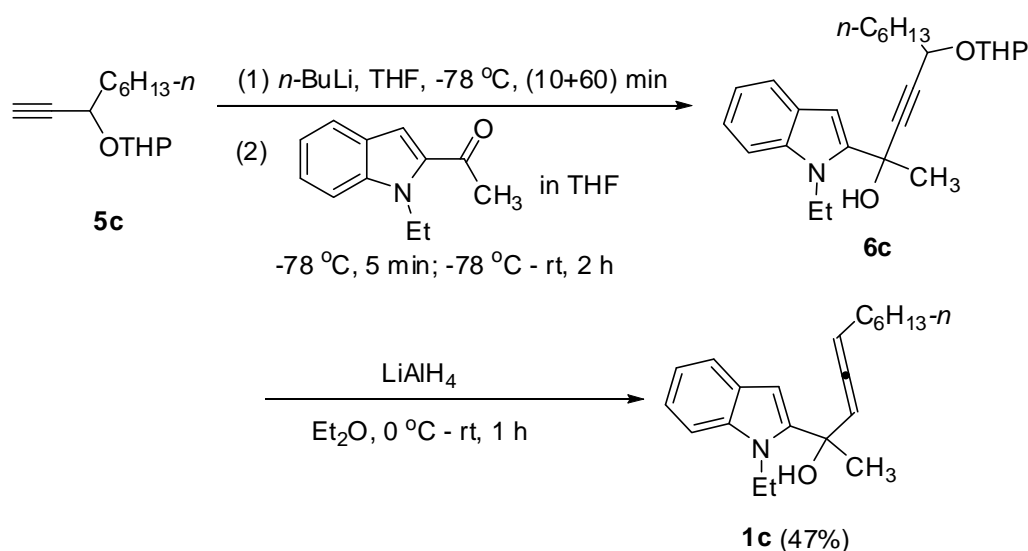

The reaction of **5c**<sup>[2]</sup> (0.9130 g, 4.0 mmol), *n*-BuLi (1.8 mL, 2.5 M in hexane, 4.5

mmol), and 1-(1-ethyl-1*H*-indol-2-yl)ethanone (0.7495 g, 4.0 mmol) in THF (20 mL) afforded **6c**, which was then used without further purification.

The reaction of **6c** (1.0197 g, 2.5 mmol) and LiAlH<sub>4</sub> (0.1000 g, 2.6 mmol) in Et<sub>2</sub>O (20 mL) afforded **1c** (0.5802 g, combined yield from **5c** to **1c** is 47%) (petroleum ether/ethyl acetate = 10/1): liquid; <sup>1</sup>H NMR (300 MHz, CDCl<sub>3</sub>) δ 7.56 (d, *J* = 7.8 Hz, 1H), 7.36-7.27 (m, 1H), 7.24-7.14 (m, 1H), 7.07 (t, *J* = 7.4 Hz, 1H), 6.46-6.36 (m, 1H), 5.63-5.52 (m, 1H), 5.50-5.36 (m, 1H), 4.60-4.31 (m, 2H), 2.20 (s, 1H), 2.10-1.98 (m, 2H), 1.88-1.78 (m, 3H), 1.47-1.35 (m, 3H), 1.34-1.15 (m, 8H), 0.88 (t, *J* = 6.9 Hz, 3H); IR (neat) ν (cm<sup>-1</sup>) 3431, 2956, 2928, 2855, 1964, 1611, 1533, 1462, 1397, 1368, 1345, 1313, 1274, 1228, 1172, 1151, 1088, 1014; MS (70 ev, EI) *m/z* (%) 312 (M<sup>+</sup>+1, 8.25), 311 (M<sup>+</sup>, 37.99), 146 (100); Elemental analysis calcd (%) for C<sub>21</sub>H<sub>29</sub>NO: C, 80.98; H, 9.38; N, 4.50; Found: C, 81.01, H, 9.31; N, 4.64.

**(4) 1-(1-Ethyl-5-methyl-1*H*-indol-2-yl)deca-2,3-dien-1-ol (**1d**)**<sup>[1]</sup>

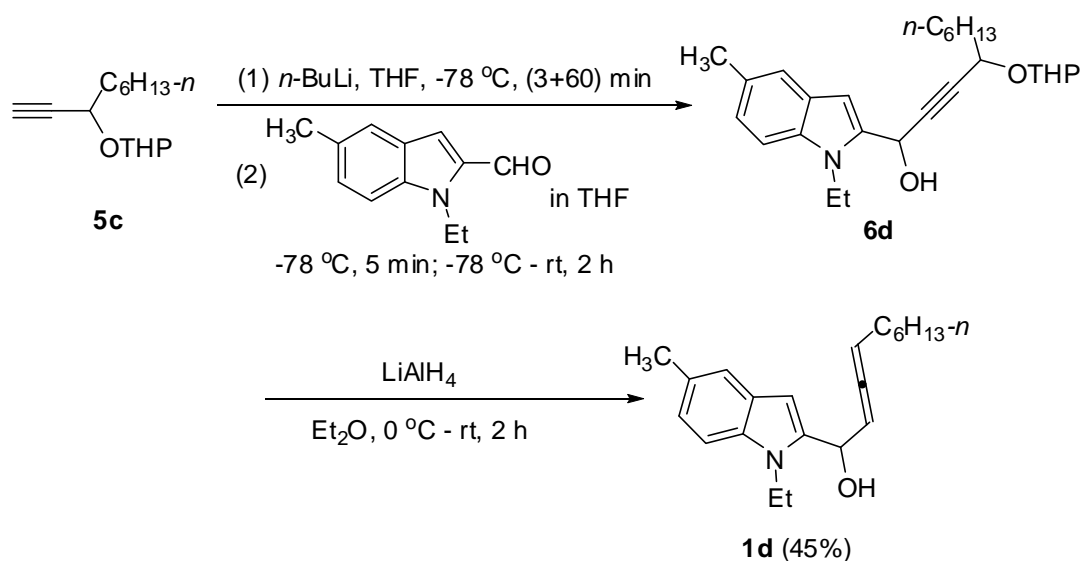

The reaction of **5c**<sup>[2]</sup> (1.3450 g, 6 mmol), *n*-BuLi (2.4 mL, 2.5 M in hexane, 6

mmol), and 1-ethyl-5-methyl-1*H*-indole-2-carbaldehyde (1.1301 g, 6 mmol) in THF (20 mL) afforded **6d**, which was then used without further purification.

The reaction of **6d** (1.8000 g, 4.4 mmol) and LiAlH<sub>4</sub> (0.2301 g, 6.1 mmol) in Et<sub>2</sub>O (20 mL) afforded **1d** (0.8485 g, combined yield from **5c** to **1d** is 45%) (petroleum ether/ethyl acetate = 10/1): liquid; <sup>1</sup>H NMR (300 MHz, CDCl<sub>3</sub>) δ 7.40-7.33 (m, 1H), 7.22 (d, *J* = 8.4 Hz, 1H), 7.03 (dd, *J* = 8.1 Hz and *J* = 1.2 Hz, 1H), 6.44-6.36 (m, 1H), 5.67-5.55 (m, 1H), 5.51-5.33 (m, 2H), 4.40-4.15 (m, 2H), 2.43 (s, 3H), 2.15-1.98 (m, 3H), 1.50-1.20 (m, 11H), 0.95-0.80 (m, 3H); IR (neat) ν (cm<sup>-1</sup>); 3356, 2955, 2927, 2856, 1965, 1543, 1484, 1458, 1378, 1347, 1299, 1222, 1181, 1159, 1113, 1043; MS (70 ev, EI) *m/z* (%) 312 (M<sup>+</sup>+1, 21.01), 311 (M<sup>+</sup>, 89.70), 212 (M<sup>+</sup>-C<sub>7</sub>H<sub>15</sub>, 100); Elemental analysis calcd (%) for C<sub>21</sub>H<sub>29</sub>NO: C, 80.98; H, 9.38; N, 4.50; Found: C, 80.97; H, 9.36; N, 4.59.

**(5) 1-(1-Ethyl-5-methoxy-1*H*-indol-2-yl)deca-2,3-dien-1-ol (**1e**)**<sup>[1]</sup>

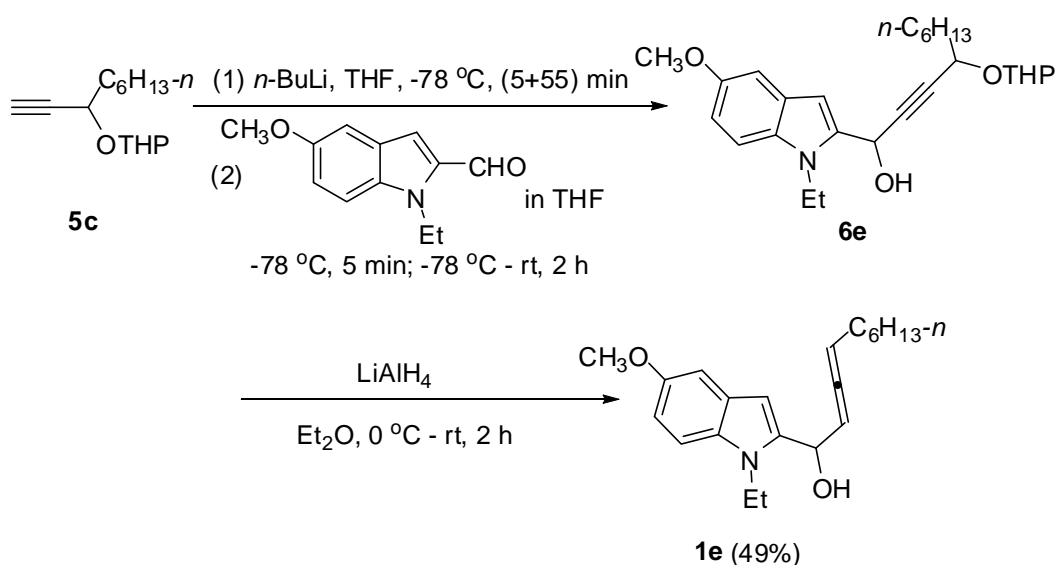

The reaction of **5c**<sup>[2]</sup> (1.3501 g, 6 mmol), *n*-BuLi (2.5 mL, 2.5 M in hexane, 6.3

mmol), and 1-ethyl-5-methoxy-1*H*-indole-2-carbaldehyde (0.6501 g, 3.2 mmol) in THF (20 mL) afforded **6e**, which was then used without further purification.

The reaction of **6e** (0.8030 g, 1.9 mmol) and LiAlH<sub>4</sub> (0.1190 g, 3 mmol) in Et<sub>2</sub>O (15 mL) afforded **1e** (0.5140 g, combined yield from **5c** to **1e** is 49%) (petroleum ether/ethyl acetate = 8/1): liquid; <sup>1</sup>H NMR (300 MHz, CDCl<sub>3</sub>) δ 7.23 (d, *J* = 9.0 Hz, 1H), 7.06 (d, *J* = 2.4 Hz, 1H), 6.88 (dd, *J* = 8.7 Hz and *J* = 2.7 Hz, 1H), 6.45-6.38 (m, 1H), 5.68-5.57 (m, 1H), 5.53-5.34 (m, 2H), 4.40-4.15 (m, 2H), 3.85 (s, 3H), 2.16-2.00 (m, 3H), 1.50-1.20 (m, 11H), 0.95-0.80 (m, 3H); IR (neat) ν (cm<sup>-1</sup>): 3415, 2949, 2928, 2855, 1964, 1621, 1576, 1534, 1483, 1452, 1379, 1350, 1297, 1208, 1175, 1151, 1107, 1035; MS (70 ev, EI) *m/z* (%) 328 (M<sup>+</sup>+1, 23.75), 327 (M<sup>+</sup>, 100); Elemental analysis calcd (%) for C<sub>21</sub>H<sub>29</sub>NO<sub>2</sub>: C, 77.02; H, 8.93; N, 4.28; Found: C, 77.11, H, 8.92; N, 4.32.

**(6) 1-(1-Ethyl-1*H*-indol-2-yl)-5-phenylpenta-2,3-dien-1-ol (**1f**)**<sup>[1]</sup>

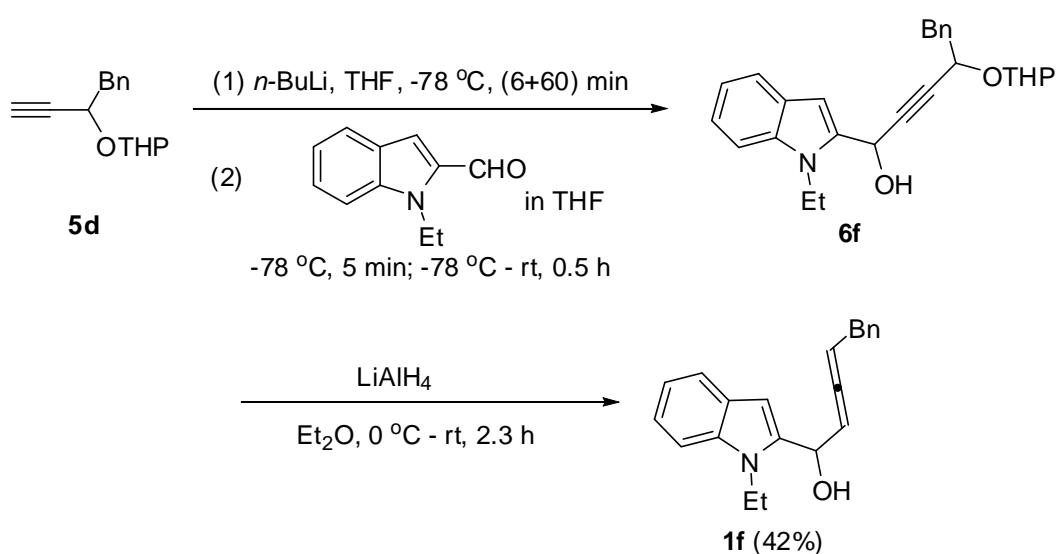

The reaction of **5d**<sup>[2]</sup> (2.3001 g, 10 mmol), *n*-BuLi (4 mL, 2.5 M in hexane, 10

mmol), and 1-ethyl-1*H*-indole-2-carbaldehyde (1.7010 g, 9.8 mmol) in THF (40 mL) afforded **6f** (3.8701 g), which was then used without further purification.

The reaction of **6f** (3.8701 g, 10 mmol) and LiAlH<sub>4</sub> (0.3891 g, 10 mmol) in Et<sub>2</sub>O (40 mL) afforded **1f** (1.2601 g, combined yield from **5d** to **1f** is 42%) (petroleum ether/ethyl acetate = 5/1): a pall yellow solid, m.p. 52-53 °C (CH<sub>2</sub>Cl<sub>2</sub>/*n*-hexane); <sup>1</sup>H NMR (300 MHz, CDCl<sub>3</sub>) δ 7.65-7.54 (m, 1H), 7.40-7.05 (m, 8H), [6.45 (s, 0.66H), 6.30 (s, 0.34 H)], 5.74-5.55 (m, 2H), 5.46-5.32 (m, 1H), 4.40-4.14 (m, 2H), 3.50-3.32 (m, 2H), 2.12-1.80 (m, 1H), 1.46-1.31 (m, 3H); IR (neat) ν (cm<sup>-1</sup>) 3387, 3058, 3027, 2976, 2931, 1965, 1602, 1537, 1494, 1460, 1413, 1379, 1347, 1316, 1263, 1221, 1165, 1127, 1077, 1014; MS (70 ev, EI) *m/z* (%) 304 (M<sup>+</sup>+1, 18.67), 303 (M<sup>+</sup>, 80.19), 286 (M<sup>+</sup>-OH, 79.63), 118 (100); Elemental analysis calcd (%) for C<sub>21</sub>H<sub>21</sub>NO: C, 83.13; H, 6.98; N, 4.62; Found: C, 83.11, H, 6.93; N, 4.70.

## 2. Synthesis of Allenic Alcohols 1g-1m

### (1) 1-(1-Ethyl-1*H*-indol-2-yl)-2-phenylbuta-2,3-dien-1-ol (**1g**)<sup>[3]</sup>

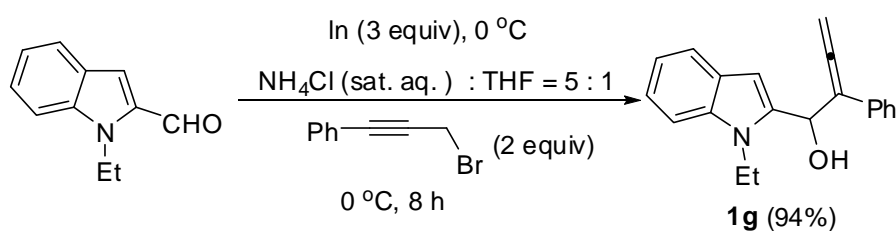

**Typical Procedure:** To a mixture of 1-ethyl-1*H*-indole-2-carbaldehyde (1.7211 g, 9.9 mmol) and indium powder (3.524 g, 31 mmol) in saturated aqueous NH<sub>4</sub>Cl (50 mL) and THF (5 mL) was added dropwise a solution of 3-phenyl-2-propynyl bromide (3.901 g, 20 mmol) in THF (5 mL) with vigorous stirring at 0 °C. After 8 h the

reaction was complete as monitored by TLC, the mixture was quenched with 30 mL of H<sub>2</sub>O, extracted with diethyl ether (30 mL×3), and dried over anhydrous Na<sub>2</sub>SO<sub>4</sub>. Filtration, evaporation, and column chromatography on silica gel (petroleum ether/ethyl acetate = 8/1) afforded **1g** (2.7038 g, 94%): oil; <sup>1</sup>H NMR (300 MHz, CDCl<sub>3</sub>) δ 7.50 (d, *J* = 7.8 Hz, 1H), 7.36-7.10 (m, 7H), 7.05 (t, *J* = 7.2 Hz, 1H), 6.41 (s, 1H), 5.80-5.68 (m, 1H), 5.38 (dd, *J* = 12.0 and 3.0 Hz, 1H), 5.31 (dd, *J* = 12.0 and 3.0 Hz, 1H), 4.42-4.18 (m, 2H), 2.48 (d, *J* = 7.8 Hz, 1H), 1.39 (t, *J* = 7.2 Hz, 3H); <sup>13</sup>C NMR (75 MHz, CDCl<sub>3</sub>) δ 207.2, 139.2, 137.0, 133.9, 128.4, 127.13, 127.09, 126.4, 121.8, 121.0, 119.3, 109.3, 109.0, 101.6, 82.7, 65.0, 38.3, 15.4; IR (neat) ν (cm<sup>-1</sup>) 3396, 3056, 2977, 2933, 1941, 1598, 1541, 1494, 1460, 1413, 1380, 1347, 1316, 1221, 1164, 1125, 1047; MS (70 ev, EI) *m/z* (%) 290 (M<sup>+</sup>+1, 27.69), 289 (M<sup>+</sup>, 100); HRMS Calcd (%) for C<sub>20</sub>H<sub>19</sub>NO (M<sup>+</sup>): 289.1467, Found: 289.1465.

The following compounds **1h-1m** were prepared according to this procedure.

**(2) 1-(1-Ethyl-1*H*-indol-2-yl)-2-butylbuta-2,3-dien-1-ol (1h)** <sup>[3]</sup>

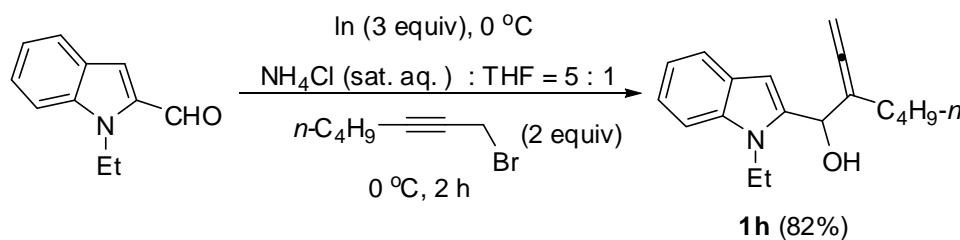

The reaction of 1-ethyl-1*H*-indole-2-carbaldehyde (1.570 g, 9.1 mmol), indium powder (3.4501 g, 30 mmol), and hept-2-ynyl bromide (3.5111 g, 20 mmol) in THF (10 mL) and saturated aqueous NH<sub>4</sub>Cl solution (50 mL) at 0 °C for 2 h afforded **1h** (2.0018 g, 82%) (petroleum ether/ethyl acetate = 10/1): oil; <sup>1</sup>H NMR (300 MHz,

CDCl<sub>3</sub>)  $\delta$  7.62-7.54 (m, 1H), 7.32 (dd,  $J$  = 8.1 Hz and 0.8 Hz, 1H), 7.25-7.15 (m, 1H), 7.14-7.04 (m, 1H), 6.44 (s, 1H), 5.27 (t,  $J$  = 2.7 Hz, 1H), 5.12-4.96 (m, 2H), 4.26 (q,  $J$  = 7.2 Hz, 2H), 2.25 (bs, 1H), 2.05-1.75 (m, 2H), 1.50-1.20 (m, 7H), 0.86 (t,  $J$  = 7.5 Hz, 3H); <sup>13</sup>C NMR (75 MHz, CDCl<sub>3</sub>)  $\delta$  204.1, 138.8, 137.1, 127.3, 121.7, 120.8, 119.3, 109.3, 106.9, 101.0, 80.5, 67.5, 38.4, 29.7, 28.3, 22.3, 15.1, 13.9; IR (neat)  $\nu$  (cm<sup>-1</sup>) 3419, 3054, 2957, 2930, 2871, 1956, 1682, 1613, 1534, 1462, 1414, 1379, 1346, 1316, 1221, 1164, 1138, 1125, 1080, 1015; MS (70 ev, EI)  $m/z$  (%) 269 (M<sup>+</sup>, 3.38), 253 (100); HRMS Calcd for C<sub>18</sub>H<sub>23</sub>NO (M<sup>+</sup>): 269.1780, Found: 269.1781.

**(3) 1-(1-Methyl-1*H*-indol-2-yl)-2-phenylbuta-2,3-dien-1-ol (**1i**)**<sup>[3]</sup>

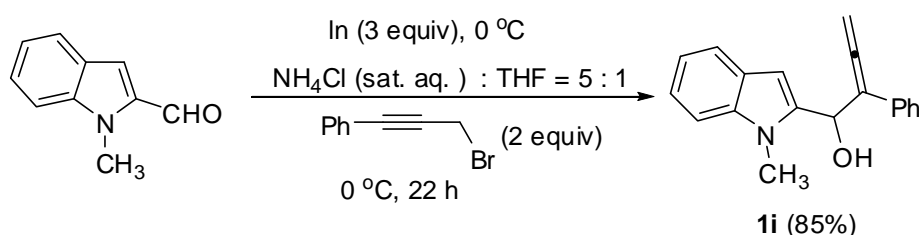

The reaction of 1-methyl-1*H*-indole-2-carbaldehyde (1.5901 g, 10 mmol), indium powder (3.431 g, 30 mmol), and 3-phenyl-2-propynyl bromide (3.8902 g, 20 mmol) in THF (10 mL) and saturated aqueous NH<sub>4</sub>Cl solution (50 mL) at 0 °C for 22 h afforded **1i** (2.3392 g, 85%) (petroleum ether/ethyl acetate = 10/1): oil; <sup>1</sup>H NMR (300 MHz, CDCl<sub>3</sub>)  $\delta$  7.51 (d,  $J$  = 7.8 Hz, 1H), 7.38-7.13 (m, 7H), 7.06 (t,  $J$  = 7.4 Hz, 1H), 6.44 (s, 1H), 5.85-5.75 (m, 1H), 5.38 (dd,  $J$  = 12.3 and 2.6 Hz, 1H), 5.31 (dd,  $J$  = 12.3 and 2.6 Hz, 1H), 3.82 (s, 3H), 2.38 (d,  $J$  = 8.1 Hz, 1H); <sup>13</sup>C NMR (75 MHz, CDCl<sub>3</sub>)  $\delta$  207.4, 139.8, 138.2, 133.9, 128.5, 127.2, 126.9, 126.5, 121.9, 120.9, 119.4, 109.1, 108.9, 101.5, 82.5, 65.4, 30.1; IR (neat)  $\nu$  (cm<sup>-1</sup>) 3390, 3055, 2937, 1940, 1612,

1597, 1539, 1494, 1469, 1451, 1402, 1343, 1317, 1267, 1234, 1166, 1136, 1101, 1045, 1011; MS (70 ev, EI)  $m/z$  (%) 276 ( $M^+ + 1$ , 4.02), 275 ( $M^+$ , 18.20), 257 ( $M^+ - H_2O$ , 31.78), 160 ( $M^+ - C_9H_7$ , 100); HRMS Calcd (%) for  $C_{19}H_{17}NO$  ( $M^+$ ): 275.1310, Found: 275.1310.

**(4) 1-(1-Methyl-1*H*-indol-2-yl)-2-butylbuta-2,3-dien-1-ol (**1j**)**<sup>[3]</sup>

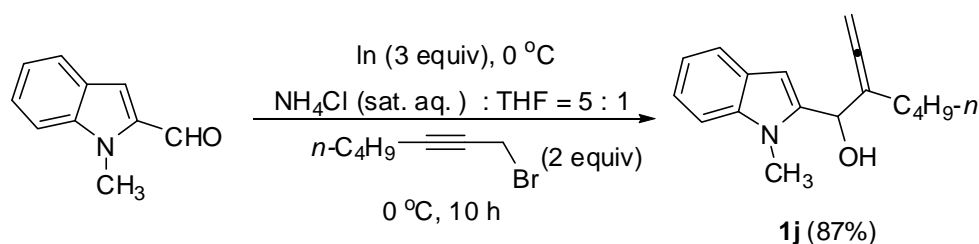

The reaction of 1-methyl-1*H*-indole-2-carbaldehyde (1.5910 g, 10 mmol), indium powder (3.430 g, 30 mmol), and hept-2-ynyl bromide (3.5101 g, 20 mmol) in THF (10 mL) and saturated aqueous  $NH_4Cl$  solution (50 mL) at 0 °C for 10 h afforded **1j** (2.2264 g, 87%) (petroleum ether/ethyl acetate = 10/1): oil;  $^1H$  NMR (300 MHz,  $CDCl_3$ )  $\delta$  7.57 (d,  $J$  = 8.1 Hz, 1H), 7.29 (d,  $J$  = 8.1 Hz, 1H), 7.21 (td,  $J$  = 7.2 Hz and 0.9 Hz, 1H), 7.14-7.04 (m, 1H), 6.44 (s, 1H), 5.26 (t,  $J$  = 3.0 Hz, 1H), 5.10-4.90 (m, 2H), 3.73 (s, 3H), 2.31 (bs, 1H), 2.05-1.75 (m, 2H), 1.50-1.20 (m, 4H), 0.85 (t,  $J$  = 7.5 Hz, 3H);  $^{13}C$  NMR (75 MHz,  $CDCl_3$ )  $\delta$  204.2, 139.3, 138.2, 127.0, 121.7, 120.7, 119.4, 109.0, 106.6, 101.1, 80.4, 67.7, 30.1, 29.6, 28.3, 22.3, 13.9; IR (neat)  $\nu$  ( $cm^{-1}$ ) 3396, 3054, 2956, 2929, 2871, 1956, 1612, 1539, 1468, 1434, 1340, 1317, 1234, 1165, 1135, 1101, 1011; MS (70 ev, EI)  $m/z$  (%) 256 ( $M^+ + 1$ , 12.42), 255 ( $M^+$ , 46.40), 238 ( $M^+ - OH$ , 100); HRMS Calcd (%) for  $C_{17}H_{21}NO$  ( $M^+$ ): 255.1623, Found: 255.1621.

**(5) 1-(1-Ethyl-1*H*-indol-2-yl)-2-allylbuta-2,3-dien-1-ol (**1k**)**<sup>[3]</sup>

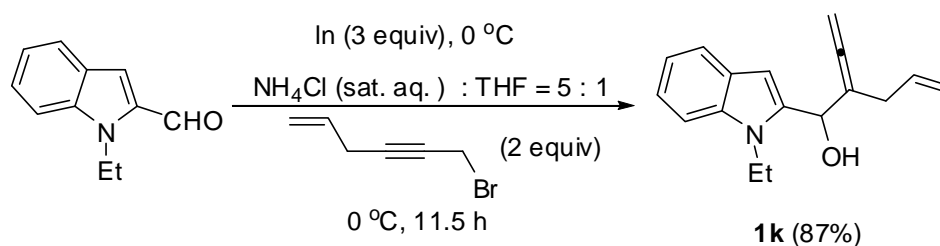

The reaction of 1-ethyl-1*H*-indole-2-carbaldehyde (0.3471 g, 2 mmol), indium powder (0.6900 g, 6.1 mmol), and hex-5-en-2-ynyl bromide (0.6375 g, 4 mmol) in THF (2 mL) and saturated aqueous  $\text{NH}_4\text{Cl}$  solution (10 mL) at 0 °C for 11.5 h afforded **1k** (0.4416 g, 87%) (petroleum ether/ethyl acetate = 20/1~10/1): oil;  $^1\text{H}$  NMR (300 MHz,  $\text{CDCl}_3$ )  $\delta$  7.58 (d,  $J$  = 8.1 Hz, 1H), 7.33 (d,  $J$  = 7.8 Hz, 1H), 7.27-7.15 (m, 1H), 7.14-7.04 (m, 1H), 6.45 (s, 1H), 5.90-5.70 (m, 1H), 5.35-5.25 (m, 1H), 5.12-4.95 (m, 4H), 4.24 (q,  $J$  = 7.2 Hz, 2H), 2.90-2.73 (m, 1H), 2.72-2.54 (m, 1H), 2.29 (d,  $J$  = 5.1 Hz, 1H), 1.36 (t,  $J$  = 7.2 Hz, 3H);  $^{13}\text{C}$  NMR (75 MHz,  $\text{CDCl}_3$ )  $\delta$  204.5, 138.4, 137.1, 134.9, 127.2, 121.7, 120.8, 119.4, 116.6, 109.3, 105.0, 101.1, 80.3, 67.0, 38.4, 33.7, 15.1; IR (neat)  $\nu$  ( $\text{cm}^{-1}$ ) 3406, 3056, 2978, 2932, 1957, 1641, 1611, 1540, 1460, 1413, 1380, 1346, 1316, 1267, 1222, 1164, 1125, 1079, 1015; MS (70 eV, EI)  $m/z$  (%) 254 ( $\text{M}^+ + 1$ , 8.92), 253 ( $\text{M}^+$ , 51.15), 238 ( $\text{M}^+ - \text{CH}_3$ , 71.96), 236 ( $\text{M}^+ - \text{OH}$ , 79.65), 118 (100); HRMS Calcd for  $\text{C}_{17}\text{H}_{19}\text{NO}$  ( $\text{M}^+$ ): 253.1467, Found: 253.1471.

**(6) 1-(1-Ethyl-5-methyl-1*H*-indol-2-yl)-2-phenylbuta-2,3-dien-1-ol (**1l**)**<sup>[3]</sup>

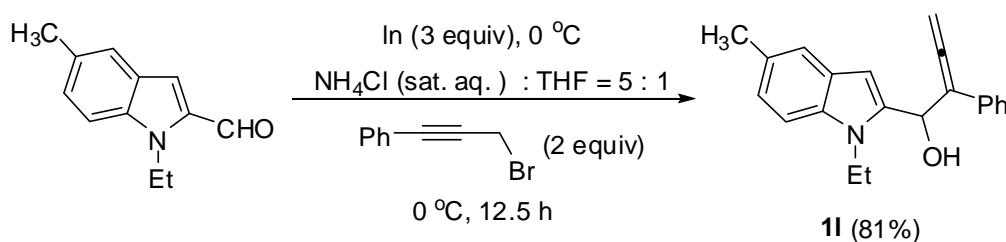

The reaction of 1-ethyl-5-methyl-1*H*-indole-2-carbaldehyde (1.101 g, 6 mmol), indium powder (2.4000 g, 21 mmol), and 3-phenyl-2-propynyl bromide (2.251 g, 12 mmol) in THF (4 mL) and saturated aqueous NH<sub>4</sub>Cl solution (20 mL) at 0 °C for 12.5 h afforded **1l** (1.4417 g, 81%) (petroleum ether/ethyl acetate = 10/1): oil; <sup>1</sup>H NMR (300 MHz, CDCl<sub>3</sub>) δ 7.40-7.12 (m, 7H), 7.04 (dd, *J* = 8.4 Hz and 1.5 Hz, 1H), 6.36 (s, 1H), 5.85-5.75 (m, 1H), 5.44 (dd, *J* = 12.0 and 2.7 Hz, 1H), 5.37 (dd, *J* = 12.0 and 2.7 Hz, 1H), 4.49-4.20 (m, 2H), 2.41 (s, 3H), 2.26 (bs, 1H), 1.44 (t, *J* = 7.2 Hz, 3H); <sup>13</sup>C NMR (75 MHz, CDCl<sub>3</sub>) δ 207.2, 139.2, 135.4, 133.9, 128.5, 128.4, 127.4, 127.1, 126.4, 123.4, 120.6, 109.1, 109.0, 101.1, 82.6, 65.0, 38.3, 21.3, 15.4; IR (neat) ν (cm<sup>-1</sup>) 3411, 3017, 2976, 2933, 1941, 1666, 1597, 1540, 1494, 1483, 1451, 1413, 1379, 1338, 1299, 1267, 1223, 1181, 1158, 1123, 1077, 1044, 1001; MS (70 ev, EI) *m/z* (%) 304 (*M*<sup>+</sup>+1, 21.48), 303 (*M*<sup>+</sup>, 100); HRMS Calcd for C<sub>21</sub>H<sub>21</sub>NO (*M*<sup>+</sup>): 303.1623, Found: 303.1636.

**(7) 2-Phenyl-1-(1-phenyl-1*H*-indol-2-yl)buta-2,3-dien-1-ol (**1m**)**<sup>[3]</sup>

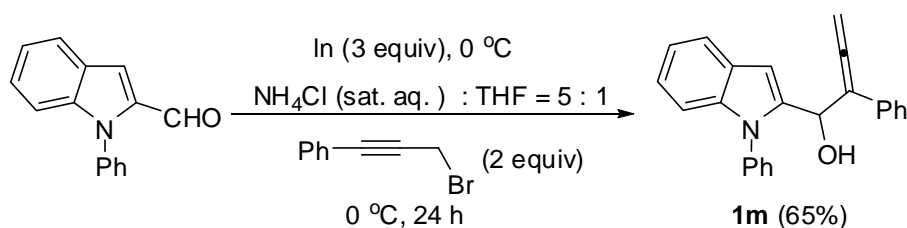

The reaction of 1-phenyl-1*H*-indole-2-carbaldehyde (1.1210 g, 5 mmol), indium powder (1.7150 g, 15 mmol), and 3-phenyl-2-propynyl bromide (2.0240 g, 10 mmol) in THF (3 mL) and saturated aqueous NH<sub>4</sub>Cl solution (15 mL) at 0 °C for 24 h afforded **1m** (1.1080 g, 65%) (petroleum ether/ethyl acetate = 20/1): oil; <sup>1</sup>H NMR

(300 MHz, CDCl<sub>3</sub>)  $\delta$  7.65-7.35 (m, 6H), 7.25-7.02 (m, 8H), 6.68 (s, 1H), 5.70-5.50 (m, 1H), 5.35-5.15 (m, 2H), 2.35 (d,  $J$  = 7.8 Hz, 1H); <sup>13</sup>C NMR (75 MHz, CDCl<sub>3</sub>)  $\delta$  207.1, 140.8, 138.7, 137.4, 133.7, 129.5, 128.3, 128.2, 127.2, 127.0, 126.4, 122.3, 120.8, 120.2, 110.5, 109.1, 102.4, 82.4, 64.7; IR (neat)  $\nu$  (cm<sup>-1</sup>) 3388, 3056, 2925, 1941, 1596, 1545, 1497, 1475, 1454, 1393, 1346, 1317, 1216, 1134, 1073, 1050, 1016; MS (70 ev, EI)  $m/z$  (%) 338 (M<sup>+</sup>+1, 2.66), 337 (M<sup>+</sup>, 10.27), 319 (M<sup>+</sup>-H<sub>2</sub>O, 18.08), 222 (M<sup>+</sup>-C<sub>9</sub>H<sub>7</sub>, 100); HRMS Calcd for C<sub>24</sub>H<sub>19</sub>NO (M<sup>+</sup>): 337.1467, Found: 337.1465.

### 3. Synthesis of Allenic Alcohols 1n-1r

#### (1) Methyl 2-((1-ethyl-1*H*-indol-2-yl)(hydroxy)methyl)buta-2,3-dienoate<sup>[4]</sup> (**1n**)

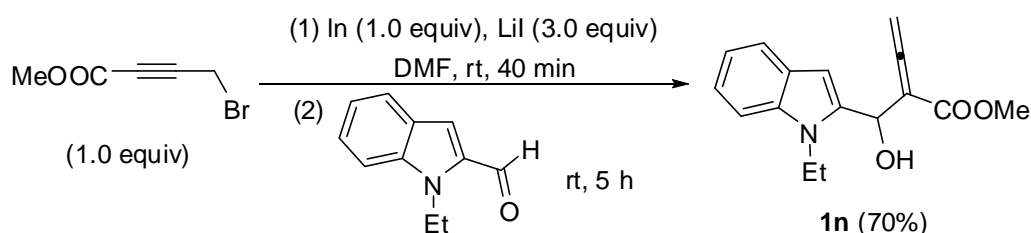

**Typical Procedure:** To a dry Schlenk tube were added sequentially indium powder (120.1 mg, 1.1 mmol), LiI (402.0 mg, 3.0 mmol), and methyl 4-bromobut-2-ynoate (181.5 mg, 1.0 mmol) in DMF (4 mL) with vigorous stirring at room temperature under a nitrogen atmosphere. After being stirred for 40 min, 1-ethyl-1*H*-indole-2-carbaldehyde (181.5 mg, 1.0 mmol) was added. After 5 h (monitored by TLC), the reaction mixture was quenched with saturated NaHCO<sub>3</sub> (20 mL), extracted with diethyl ether (20 mL×3), washed with water, and dried over anhydrous Na<sub>2</sub>SO<sub>4</sub>. Filtration, evaporation, and column chromatography on silica gel (petroleum ether/ethyl acetate = 5/1~1/1) afforded **1n** (198.1 mg, 70%): oil; <sup>1</sup>H NMR

(300 MHz, CDCl<sub>3</sub>)  $\delta$  7.57 (d,  $J$  = 7.5 Hz, 1H), 7.32 (d,  $J$  = 8.4 Hz, 1H), 7.20 (t,  $J$  = 7.5 Hz, 1H), 7.08 (t,  $J$  = 7.5 Hz, 1H), 6.41 (s, 1H), 5.80-5.68 (m, 1H), 5.40-5.25 (m, 2H), 4.38-4.13 (m, 2H), 3.74 (s, 3H), 3.27 (d,  $J$  = 8.1 Hz, 1H), 1.39 (t,  $J$  = 7.2 Hz, 3H); <sup>13</sup>C NMR (75 MHz, CDCl<sub>3</sub>)  $\delta$  212.4, 166.4, 138.8, 136.8, 127.0, 121.7, 120.8, 119.3, 109.3, 102.5, 100.3, 82.2, 64.6, 52.4, 38.3, 15.1; IR (neat),  $\nu$  (cm<sup>-1</sup>) 3492, 3059, 2983, 2952, 2901, 2845, 1965, 1714, 1611, 1538, 1461, 1436, 1381, 1347, 1260, 1221, 1165, 1127, 1105, 1080, 1029; MS (70 ev, EI)  $m/z$  (%) 271 (M<sup>+</sup>, 4.06), 253 (M<sup>+</sup>, 100); HRMS Calcd for C<sub>16</sub>H<sub>17</sub>NO<sub>3</sub> (M<sup>+</sup>): 271.1208, Found: 271.1203.

The following compounds **1o-1r** were prepared according to this procedure.

**(2) *N,N*-Dimethyl 2-((1-ethyl-1*H*-indol-2-yl)(hydroxy)methyl)buta-2,3-dienamide (1o)**<sup>[4]</sup>

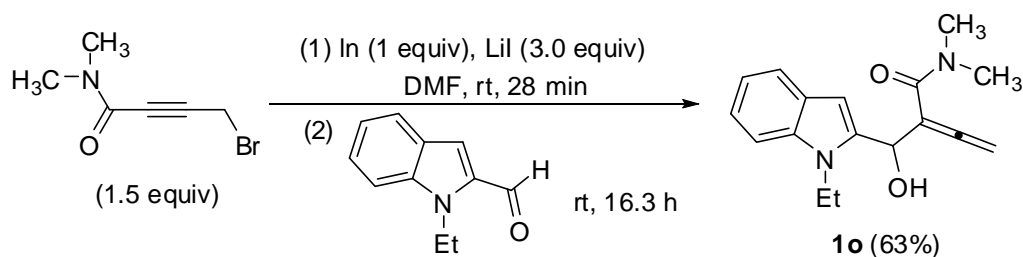

The reaction of indium powder (231.0 mg, 2.0 mmol), LiI (810.5 mg, 6.0 mmol), *N,N*-dimethyl 4-bromobut-2-ynamide (610.2 mg, 3.2 mmol), and 1-ethyl-1*H*-indole-2-carbaldehyde (343.5 mg, 2.0 mmol) in DMF (8 mL) at rt under a nitrogen atmosphere for 16.3 h afforded **1o** (357.4 mg, 63%) (petroleum ether/ethyl acetate = 2/1): oil; <sup>1</sup>H NMR (300 MHz, CDCl<sub>3</sub>)  $\delta$  7.59 (d,  $J$  = 7.8 Hz, 1H), 7.34 (d,  $J$  = 8.1 Hz, 1H), 7.21 (t,  $J$  = 7.5 Hz, 1H), 7.10 (t,  $J$  = 7.5 Hz, 1H), 6.39 (s, 1H), 5.78 (s, 1H), 5.19-4.81 (m, 3H), 4.43-4.10 (m, 2H), 3.12 (s, 3H), 2.99 (s, 3H), 1.41 (t,  $J$  = 7.1

Hz, 3H);  $^{13}\text{C}$  NMR (75 MHz,  $\text{CDCl}_3$ )  $\delta$  206.5, 166.8, 139.1, 136.6, 127.3, 121.3, 120.6, 119.1, 109.1, 100.8, 99.5, 80.1, 67.5, 38.9, 38.3, 35.5, 15.1; IR (neat)  $\nu$  ( $\text{cm}^{-1}$ ) 3373, 3055, 2979, 2933, 1951, 1615, 1481, 1461, 1397, 1347, 1316, 1261, 1223, 1188, 1128, 1080, 1055, 1015; MS (70 ev, EI)  $m/z$  (%) 285 ( $\text{M}^+ + 1$ , 19.54), 284 ( $\text{M}^+$ , 100); HRMS Calcd for  $\text{C}_{17}\text{H}_{20}\text{N}_2\text{O}_2$  ( $\text{M}^+$ ): 284.1525, Found: 284.1524.

**(3) 1-(1-Ethyl-1*H*-indol-2-yl)-2-(hydroxymethyl)buta-2,3-dienol (**1p**)** <sup>[4]</sup>

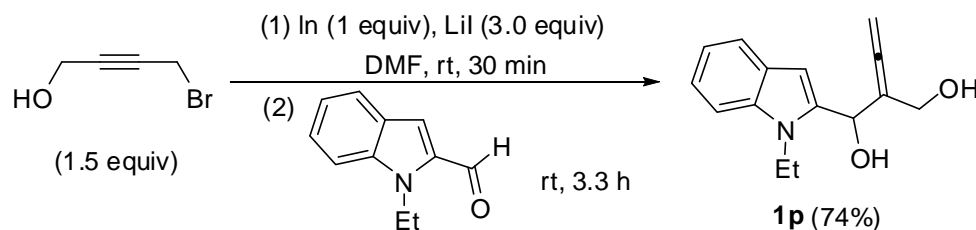

The reaction of indium powder (229.1 mg, 2.0 mmol), LiI (812.5 mg, 6.1 mmol), 4-bromobut-2-yn-1-ol (450.1 mg, 3.0 mmol), and 1-ethyl-1*H*-indole-2-carbaldehyde (350.1 mg, 2.0 mmol) in DMF (8 mL) at rt under a nitrogen atmosphere for 3.3 h afforded **1p** (364.5 mg, 74%) (petroleum ether/ethyl acetate = 3/1~1/1): oil;  $^1\text{H}$  NMR (300 MHz,  $\text{CDCl}_3$ )  $\delta$  7.48 (d,  $J$  = 8.1 Hz, 1H), 7.22 (d,  $J$  = 8.1 Hz, 1H), 7.18-7.06 (m, 1H), 7.00 (t,  $J$  = 7.5 Hz, 1H), 6.37 (s, 1H), 5.42 (s, 1H), 4.90 (d,  $J$  = 1.8 Hz, 2H), 4.20-3.90 (m, 4H), 3.40-3.16 (m, 1H), 2.70-2.40 (m, 1H), 1.23 (t,  $J$  = 7.1 Hz, 3H);  $^{13}\text{C}$  NMR (75 MHz,  $\text{CDCl}_3$ )  $\delta$  205.0, 138.8, 137.0, 127.2, 121.7, 120.8, 119.5, 109.3, 105.4, 100.5, 79.6, 66.9, 61.5, 38.4, 15.0; IR (neat)  $\nu$  ( $\text{cm}^{-1}$ ) 3358, 3055, 2979, 2934, 2873, 1957, 1610, 1540, 1460, 1414, 1381, 1346, 1316, 1223, 1164, 1125, 1079, 1013; MS (70 ev, EI)  $m/z$  (%) 244 ( $\text{M}^+ + 1$ , 11.29), 243 ( $\text{M}^+$ , 67.06), 226 ( $\text{M}^+ - \text{OH}$ , 100); HRMS Calcd for  $\text{C}_{15}\text{H}_{17}\text{NO}_2$  ( $\text{M}^+$ ): 243.1259, Found: 243.1260.

**(4) 1-(1-Ethyl-4-methyl-1*H*-indol-2-yl)-2-(hydroxymethyl)buta-2,3-dienol (**1q**)**<sup>[4]</sup>

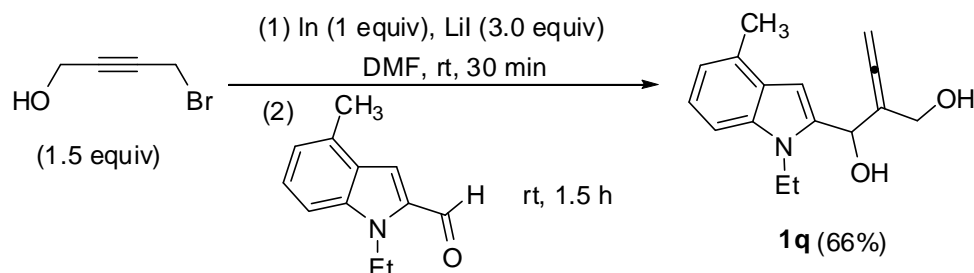

The reaction of indium powder (230.1 mg, 2.0 mmol), LiI (805.2 mg, 6.0 mmol), 4-bromobut-2-yn-1-ol (450.2 mg, 3.0 mmol), and 1-ethyl-4-methyl-1*H*-indole-2-carbaldehyde (382.5 mg, 2.0 mmol) in DMF (8 mL) at rt under a nitrogen atmosphere for 1.5 h afforded **1q** (347.3 mg, 66%) (petroleum ether/ethyl acetate = 5/1~1/1): oil; <sup>1</sup>H NMR (300 MHz, CDCl<sub>3</sub>) δ 7.24-7.10 (m, 2H), 6.94 (d, *J* = 6.0 Hz, 1H), 6.54 (s, 1H), 5.62-5.50 (m, 1H), 5.05 (d, *J* = 2.1 Hz, 2H), 4.32-4.05 (m, 4H), 3.35-3.45 (m, 1H), 2.75-2.60 (m, 1H), 2.57 (s, 3H), 1.37 (t, *J* = 7.0 Hz, 3H); <sup>13</sup>C NMR (75 MHz, CDCl<sub>3</sub>) δ 204.9, 138.1, 136.6, 130.3, 127.1, 121.9, 119.7, 107.0, 105.4, 98.9, 79.5, 66.9, 61.5, 38.5, 18.6, 15.0; IR (neat) ν (cm<sup>-1</sup>) 3384, 3045, 2968, 2932, 2872, 1957, 1583, 1549, 1489, 1458, 1414, 1380, 1315, 1234, 1122, 1076, 1013; MS (70 ev, EI) *m/z* (%) 258 (M<sup>+</sup>+1, 18.48), 257 (M<sup>+</sup>, 100); HRMS Calcd for C<sub>16</sub>H<sub>19</sub>NO<sub>2</sub> (M<sup>+</sup>): 257.1416, Found: 257.1416.

**(5) 1-(1-Ethyl-7-methyl-1*H*-indol-2-yl)-2-(hydroxymethyl)buta-2,3-dienol (**1r**)**<sup>[4]</sup>

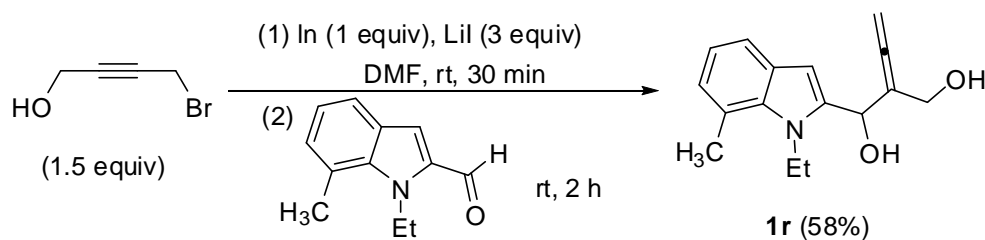

The reaction of indium powder (1.1592 g, 10 mmol), LiI (4.0102 g, 30 mmol), 4-bromobut-2-yn-1-ol (2.3520 g, 15 mmol), and 1-ethyl-7-methyl-1*H*-indole-2-carbaldehyde (1.8901 g, 10 mmol) in DMF (30 mL) at rt under a nitrogen atmosphere for 2 h afforded **1r** (1.5097 g, 58%) (petroleum ether/ethyl acetate = 5/1~1/1): oil; <sup>1</sup>H NMR (300 MHz, CDCl<sub>3</sub>) δ 7.48 (d, *J* = 7.2 Hz, 1H), 7.10-6.95 (m, 2H), 6.55 (s, 1H), 5.54 (s, 1H), 5.06 (d, *J* = 1.8 Hz, 2H), 4.50-4.31 (m, 2H), 4.26 (d, *J* = 12.2 Hz, 1H), 4.11 (d, *J* = 12.2 Hz, 1H), 3.79 (d, *J* = 5.4 Hz, 1H), 3.16 (bs, 1H), 2.78 (s, 3H), 1.35 (t, *J* = 7.0 Hz, 3H); <sup>13</sup>C NMR (75 MHz, CDCl<sub>3</sub>) δ 205.0, 139.2, 135.8, 128.2, 125.1, 120.6, 119.5, 118.9, 105.5, 101.6, 79.6, 66.5, 61.4, 39.7, 19.9, 17.4; IR (neat) ν (cm<sup>-1</sup>) 3384, 3045, 2968, 2932, 2872, 1957, 1583, 1549, 1489, 1458, 1414, 1380, 1315, 1234, 1122, 1076, 1013; MS (70 ev, EI) *m/z* (%) 258 (*M*<sup>+</sup>+1, 11.92), 257 (*M*<sup>+</sup>, 68.15), 240 (100); HRMS Calcd for C<sub>16</sub>H<sub>19</sub>NO<sub>2</sub> (*M*<sup>+</sup>): 257.1416, Found: 257.1418.

#### 4. Synthesis of 1-(1-Ethyl-1*H*-indol-2-yl)buta-2,3-dien-1-ol (**1s**)<sup>[5]</sup>

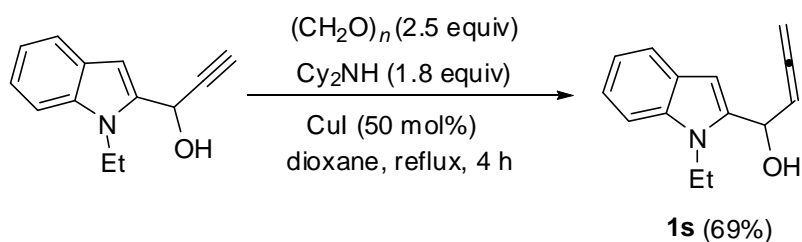

To a three-necked flask equipped with a reflux condenser were added

paraformaldehyde (0.7601 g, 25 mmol), CuI (0.9673 g, 5 mmol), dioxane (50 mL), 1-(1-ethyl-1*H*-indol-2-yl)-prop-2-yn-1-ol (1.9992 g, 10 mmol), and dicyclohexylamine (3.2957 g, 18 mmol) sequentially. The resulting mixture was gently refluxed with stirring. After 4 h as monitored by TLC, the resulting mixture was then cooled to room temperature and filtered. The filtrate was diluted with 30 mL of ether. The resulting mixture was then acidified with 1 N hydrochloric acid to pH 1-2. The organic layer was washed with water to neutral and dried over anhydrous Na<sub>2</sub>SO<sub>4</sub>. Filtration, evaporation, and column chromatography on silica gel (petroleum ether/ethyl acetate = 10/1~5/1) afforded the terminal allene **1s** (1.4657 g, 69%): liquid; <sup>1</sup>H NMR (300 MHz, CDCl<sub>3</sub>) δ 7.60 (d, *J* = 7.8 Hz, 1H), 7.34 (d, *J* = 8.1 Hz, 1H), 7.22 (td, *J* = 7.8 and 0.9 Hz, 1H), 7.09 (t, *J* = 7.5 Hz, 1H), 6.49 (s, 1H), 5.66 (q, *J* = 6.3 Hz, 1H), 5.52-5.40 (m, 1H), 5.06-4.98 (m, 2H), 4.43-4.17 (m, 2H), 2.07 (d, *J* = 5.7 Hz, 1H), 1.41 (t, *J* = 7.2 Hz, 3H); <sup>13</sup>C NMR (75 MHz, CDCl<sub>3</sub>) δ 207.3, 139.7, 137.0, 127.2, 121.9, 121.0, 119.5, 109.4, 100.1, 93.4, 79.0, 65.0, 38.5, 15.3; IR (neat) ν (cm<sup>-1</sup>) 3384, 3051, 2977, 2931, 1956, 1543, 1460, 1414, 1380, 1346, 1315, 1220, 1165, 1131, 1107, 1033; MS (70 ev, EI) *m/z* (%) 214 (M<sup>+</sup>+1, 13.02), 213 (M<sup>+</sup>, 84.97), 118 (100); HRMS Calcd for C<sub>14</sub>H<sub>15</sub>NO (M<sup>+</sup>): 213.1154, Found: 213.1157.

## 5. Synthesis of Carbazoles 3a-3s

### (1) 9-Ethyl-4-pentyl-9*H*-carbazole (3a)

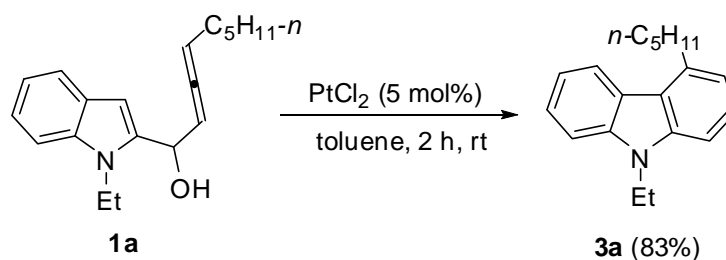

**Typical Procedure:** To a dry Schlenk tube were added sequentially  $\text{PtCl}_2$  (2.9 mg, 0.011 mmol), **1a** (57.0 mg, 0.20 mmol), and toluene (1 mL) under  $\text{N}_2$ . After continuous stirring for 2 h at rt, the reaction was complete as monitored by TLC. Evaporation and column chromatography on silica gel (petroleum ether/ethyl acetate = 100/1) afforded **3a** (44.4 mg, 83%): liquid;  $^1\text{H}$  NMR (300 MHz,  $\text{CDCl}_3$ )  $\delta$  8.13 (d,  $J = 7.8$  Hz, 1H), 7.52-7.34 (m, 3H), 7.32-7.20 (m, 2H), 7.02 (d,  $J = 7.2$  Hz, 1H), 4.36 (q,  $J = 7.2$  Hz, 2H), 3.22 (t,  $J = 7.8$  Hz, 2H), 1.92-1.78 (m, 2H), 1.58-1.33 (m, 7H), 0.93 (t,  $J = 7.2$  Hz, 3H);  $^{13}\text{C}$  NMR (75 MHz,  $\text{CDCl}_3$ )  $\delta$  140.2, 139.8, 138.6, 125.4, 124.9, 122.9, 122.7, 120.7, 119.5, 118.7, 108.2, 106.0, 37.4, 34.5, 32.1, 29.4, 22.7, 14.1, 13.7; IR (neat)  $\nu$  ( $\text{cm}^{-1}$ ) 3049, 2955, 2930, 2860, 1618, 1594, 1581, 1498, 1469, 1435, 1381, 1329, 1297, 1245, 1216, 1151, 1110, 1079, 1027; MS (70 ev, EI)  $m/z$  (%) 266 ( $\text{M}^+ + 1$ , 21.45), 265 ( $\text{M}^+$ , 100); HRMS Calcd for  $\text{C}_{19}\text{H}_{23}\text{N}$  ( $\text{M}^+$ ): 265.1830, Found: 265.1829.

The following compounds **3b-3s** were prepared according to this procedure.

**(2) 9-Ethyl-4-methyl-9H-carbazole (3b)**

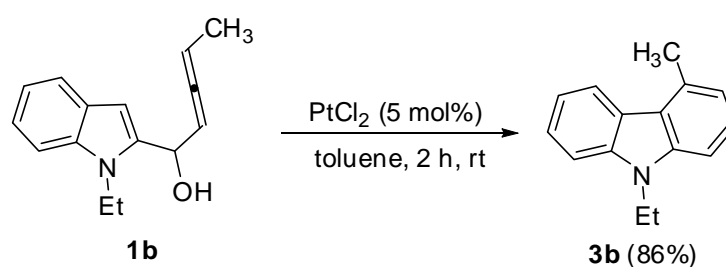

The reaction of  $\text{PtCl}_2$  (5.3 mg, 0.02 mmol) and **1b** (90.9 mg, 0.40 mmol) in toluene (2 mL) at rt for 2 h afforded **3b** (71.9 mg, 86%) (petroleum ether/ethyl acetate = 50/1): liquid;  $^1\text{H}$  NMR (300 MHz,  $\text{CDCl}_3$ )  $\delta$  8.20 (d,  $J$  = 7.8 Hz, 1H), 7.51-7.32 (m, 3H), 7.30-7.18 (m, 2H), 7.00 (d,  $J$  = 6.9 Hz, 1H), 4.35 (q,  $J$  = 7.2 Hz, 2H), 2.89 (s, 3H), 1.40 (t,  $J$  = 7.2 Hz, 3H);  $^{13}\text{C}$  NMR (75 MHz,  $\text{CDCl}_3$ )  $\delta$  139.9, 139.8, 133.5, 125.4, 124.9, 123.5, 122.7, 121.4, 120.3, 118.7, 108.1, 106.0, 37.4, 20.8, 13.7; IR (neat)  $\nu$  ( $\text{cm}^{-1}$ ) 3049, 2974, 2933, 1618, 1594, 1576, 1498, 1470, 1454, 1427, 1385, 1327, 1292, 1250, 1221, 1150, 1107, 1081, 1026, 1012; MS (70 ev, EI)  $m/z$  (%) 210 ( $\text{M}^+ + 1$ , 9.17), 209 ( $\text{M}^+$ , 53.14), 194 ( $\text{M}^+ - \text{CH}_3$ , 100); HRMS Calcd for  $\text{C}_{15}\text{H}_{15}\text{N}$  ( $\text{M}^+$ ): 209.1204, Found: 209. 1205.

**(3) 9-Ethyl-1-methyl-4-hexyl-9H-carbazole (3c)**

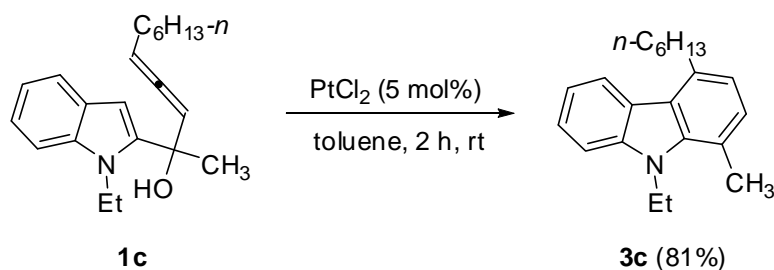

The reaction of  $\text{PtCl}_2$  (4.2 mg, 0.016 mmol) and **1c** (90.2 mg, 0.29 mmol) in toluene (1.5 mL) at rt for 2 h afforded **3c** (68.8 mg, 81%): liquid;  $^1\text{H}$  NMR (300 MHz,  $\text{CDCl}_3$ )  $\delta$  8.12 (d,  $J$  = 8.1 Hz, 1H), 7.51-7.40 (m, 2H), 7.29-7.20 (m, 1H), 7.11 (d,  $J$  = 7.2 Hz, 1H), 6.91 (d,  $J$  = 7.5 Hz, 1H), 4.62 (q,  $J$  = 7.2 Hz, 2H), 3.19 (t,  $J$  = 7.8 Hz, 2H), 2.81 (s, 3H), 1.90-1.75 (m, 2H), 1.60-1.47 (m, 2H), 1.43 (d,  $J$  = 7.2 Hz, 3H), 1.37-1.28 (m, 4H), 0.95-0.85 (m, 3H);  $^{13}\text{C}$  NMR (75 MHz,  $\text{CDCl}_3$ )  $\delta$  140.5, 138.9, 136.3, 128.7, 124.8, 123.1, 122.6, 121.4, 119.7, 118.8, 117.2, 108.4, 39.2, 34.3, 31.8, 29.61, 29.59, 22.7, 20.1, 15.5, 14.1; IR (neat)  $\nu$  ( $\text{cm}^{-1}$ ) 3048, 3013, 2955, 2928, 2857,

1611, 1577, 1512, 1463, 1394, 1378, 1350, 1323, 1252, 1230, 1161, 1148, 1118, 1082, 1029; MS (70 ev, EI)  $m/z$  (%) 294 ( $M^+ + 1$ , 36.81), 293 ( $M^+$ , 100); HRMS Calcd for  $C_{21}H_{27}N$  ( $M^+$ ): 293.2144, Found: 293.2135.

**(4) 9-Ethyl-3-methyl-5-hexyl -9H-carbazole (3d)**

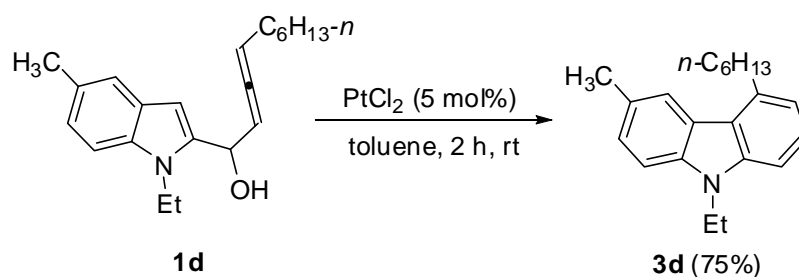

The reaction of  $PtCl_2$  (4.0 mg, 0.015 mmol) and **1d** (92.0 mg, 0.30 mmol) in toluene (1.5 mL) at rt for 2 h afforded **3d** (65.1 mg, 75%): liquid;  $^1H$  NMR (300 MHz,  $CDCl_3$ )  $\delta$  7.92 (s, 1H), 7.41-7.17 (m, 4H), 6.98 (d,  $J = 7.2$  Hz, 1H), 4.31 (q,  $J = 7.2$  Hz, 2H), 3.21 (t,  $J = 7.8$  Hz, 2H), 2.56 (s, 3H), 1.93-1.76 (m, 2H), 1.62-1.45 (m, 2H), 1.44-1.27 (m, 7H), 0.91 (t,  $J = 6.9$  Hz, 3H);  $^{13}C$  NMR (75 MHz,  $CDCl_3$ )  $\delta$  140.5, 138.6, 138.1, 127.8, 126.1, 125.2, 123.0, 122.8, 120.5, 119.2, 107.8, 105.9, 37.4, 34.5, 31.8, 29.7, 29.5, 22.7, 21.6, 14.1, 13.7; IR (neat)  $\nu$  ( $cm^{-1}$ ) 2955, 2928, 2858, 1615, 1597, 1579, 1499, 1476, 1379, 1331, 1309, 1248, 1150, 1116, 1080; MS (70 ev, EI)  $m/z$  (%) 294 ( $M^+ + 1$ , 22.27), 293 ( $M^+$ , 100); HRMS Calcd for  $C_{21}H_{27}N$  ( $M^+$ ): 293.2144, Found: 293.2131.

**(5) 9-Ethyl-3-methoxy-5-hexyl -9H-carbazole (3e)**

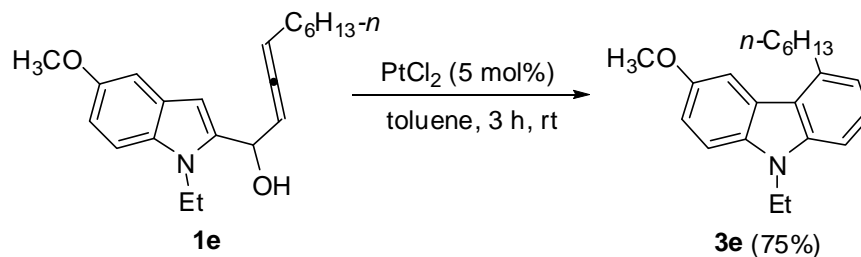

The reaction of  $\text{PtCl}_2$  (4.1 mg, 0.015 mmol) and **1e** (92.5 mg, 0.28 mmol) in toluene (1.5 mL) at rt for 3 h afforded **3e** (65.3 mg, 75%) (petroleum ether/ethyl acetate = 50/1): liquid;  $^1\text{H}$  NMR (300 MHz,  $\text{CDCl}_3$ )  $\delta$  7.65 (d,  $J = 2.1$  Hz, 1H), 7.40-7.28 (m, 2H), 7.26-7.18 (m, 1H), 7.11 (dd,  $J = 8.7$  and 2.4 Hz, 1H), 6.97 (d,  $J = 7.2$  Hz, 1H), 4.30 (q,  $J = 7.2$  Hz, 2H), 3.93 (s, 3H), 3.19 (t,  $J = 7.8$  Hz, 2H), 1.92-1.78 (m, 2H), 1.61-1.46 (m, 2H), 1.45-1.27 (m, 7H), 0.90 (t,  $J = 6.9$  Hz, 3H);  $^{13}\text{C}$  NMR (75 MHz,  $\text{CDCl}_3$ )  $\delta$  153.3, 140.8, 138.5, 134.9, 125.4, 123.1, 120.5, 119.0, 113.4, 108.6, 106.4, 106.1, 56.1, 37.4, 34.5, 31.9, 29.9, 29.7, 22.7, 14.1, 13.7; IR (neat)  $\nu$  ( $\text{cm}^{-1}$ ) 3047, 2930, 2858, 1624, 1598, 1580, 1498, 1479, 1437, 1378, 1305, 1287, 1224, 1206, 1150, 1102, 1039; MS (70 ev, EI)  $m/z$  (%) 310 ( $\text{M}^+ + 1$ , 23.35), 309 ( $\text{M}^+$ , 100); HRMS Calcd for  $\text{C}_{21}\text{H}_{27}\text{NO}$  ( $\text{M}^+$ ): 309.2093, Found: 309.2101.

#### (6) 4-Benzyl-9-ethyl-9H-carbazole (**3f**)

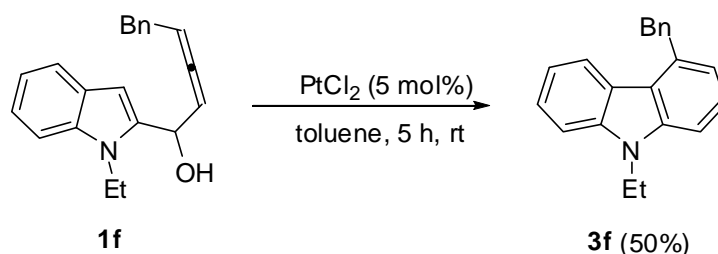

The reaction of  $\text{PtCl}_2$  (2.8 mg, 0.011 mmol) and **1f** (60.2 mg, 0.20 mmol) in toluene (1 mL) at rt for 5 h afforded **3f** (28.7 mg, 50%): liquid;  $^1\text{H}$  NMR (300 MHz,

CDCl<sub>3</sub>)  $\delta$  8.07 (d,  $J$  = 8.1 Hz, 1H), 7.48-7.12 (m, 10H), 6.91 (d,  $J$  = 7.5 Hz, 1H), 4.65 (s, 2H), 4.37 (q,  $J$  = 7.2 Hz, 2H), 1.43 (t,  $J$  = 7.2 Hz, 3H); <sup>13</sup>C NMR (75 MHz, CDCl<sub>3</sub>)  $\delta$  140.2, 139.9, 135.7, 128.9, 128.5, 126.0, 125.5, 125.1, 122.85, 122.79, 121.3, 120.5, 118.7, 108.2, 106.6, 39.9, 37.5, 13.7; IR (neat)  $\nu$  (cm<sup>-1</sup>) 3039, 2974, 2919, 1618, 1594, 1495, 1460, 1435, 1383, 1330, 1244, 1153, 1104, 1029; MS (70 ev, EI)  $m/z$  (%) 286 (M<sup>+</sup>+1, 19.99), 285 (M<sup>+</sup>, 90.76), 270 (M<sup>+</sup>-CH<sub>3</sub>, 100); HRMS Calcd for C<sub>21</sub>H<sub>19</sub>N (M<sup>+</sup>): 285.1517, Found: 285.1517.

**(7) 9-Ethyl-2-phenyl-9H-carbazole (3g)**

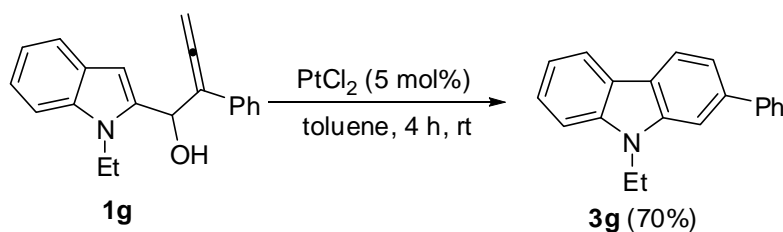

The reaction of PtCl<sub>2</sub> (5.4 mg, 0.02 mmol) and **1g** (116.0 mg, 0.4 mmol) in toluene (2 mL) at rt for 4 h afforded **3g** (76.2 mg, 70%), which was stored in a refrigerator to produce the solid state product: a pall yellow solid, m.p. 118-119 °C (CH<sub>2</sub>Cl<sub>2</sub>/*n*-hexane); <sup>1</sup>H NMR (300 MHz, CDCl<sub>3</sub>)  $\delta$  8.18-8.08 (m, 2H), 7.78-7.70 (m, 2H), 7.58 (d,  $J$  = 1.2 Hz, 1H), 7.54-7.32 (m, 6H), 7.28-7.20 (m, 1H), 4.40 (q,  $J$  = 7.2 Hz, 2H), 1.45 (q,  $J$  = 7.2 Hz, 3H); <sup>13</sup>C NMR (75 MHz, CDCl<sub>3</sub>)  $\delta$  142.2, 140.4, 139.1, 128.8, 127.6, 127.0, 125.6, 122.7, 122.1, 120.6, 120.4, 118.9, 118.5, 108.4, 107.0, 37.5, 13.8; IR (neat)  $\nu$  (cm<sup>-1</sup>) 3057, 2975, 2931, 1627, 1599, 1564, 1488, 1470, 1457, 1436, 1380, 1328, 1255, 1232, 1156, 1125, 1087; MS (70 ev, EI)  $m/z$  (%) 272 (M<sup>+</sup>+1, 18.05), 271 (M<sup>+</sup>, 80.40), 256 (M<sup>+</sup>-CH<sub>3</sub>, 100); HRMS Calcd for C<sub>20</sub>H<sub>17</sub>N (M<sup>+</sup>):

271.1361, Found: 271.1360.

**(8) 2-Butyl-9-ethyl-9H-carbazole (3h)**

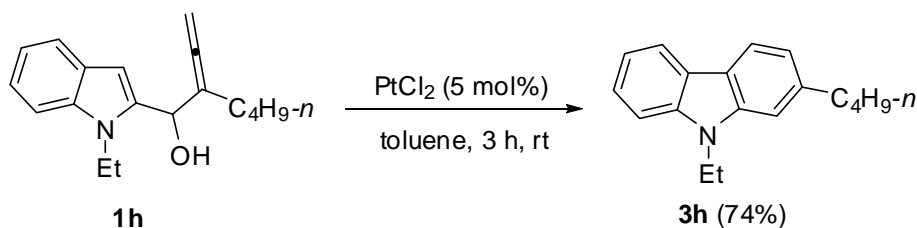

The reaction of PtCl<sub>2</sub> (5.4 mg, 0.02 mmol) and **1h** (100.1 mg, 0.37 mmol) in toluene (2 mL) at rt for 3 h afforded **3h** (69.1 mg, 74%) (petroleum ether/ethyl acetate = 50/1): liquid; <sup>1</sup>H NMR (300 MHz, CDCl<sub>3</sub>) δ 8.06 (dt, *J* = 7.8 and 0.9 Hz, 1H), 8.00 (d, *J* = 7.8 Hz, 1H), 7.48-7.36 (m, 2H), 7.25-7.17 (m, 2H), 7.07 (dd, *J* = 7.8 and 1.2 Hz, 1H), 4.36 (q, *J* = 7.2 Hz, 2H), 2.83 (t, *J* = 7.8 Hz, 2H), 1.79-1.66 (m, 2H), 1.49-1.38 (m, 5H), 0.97 (t, *J* = 7.4 Hz, 3H); <sup>13</sup>C NMR (75 MHz, CDCl<sub>3</sub>) δ 141.0, 140.3, 140.0, 125.0, 123.0, 120.8, 120.0, 119.7, 118.6, 108.2, 107.9, 37.4, 36.5, 34.3, 22.5, 14.0, 13.8; IR (neat) ν (cm<sup>-1</sup>) 3051, 2955, 2929, 2857, 1685, 1629, 1602, 1577, 1498, 1458, 1377, 1326, 1234, 1180, 1155, 1133, 1120, 1102, 1086, 1058, 1020, 1000; MS (70 ev, EI) *m/z* (%) 251 (M<sup>+</sup>, 36.24), 194 (M<sup>+</sup>-C<sub>4</sub>H<sub>9</sub>, 100); HRMS Calcd for C<sub>18</sub>H<sub>21</sub>N (M<sup>+</sup>): 251.1674, Found: 251.1672.

**(9) 9-Methyl-2-phenyl-9H-carbazole (3i)**

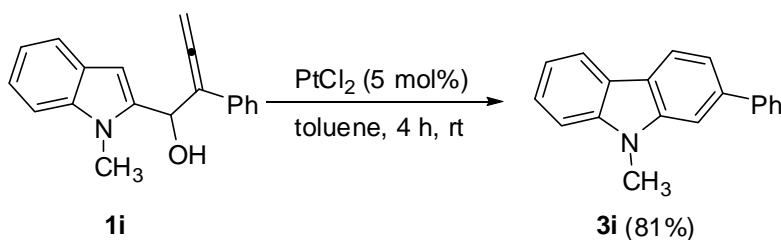

The reaction of  $\text{PtCl}_2$  (5.2 mg, 0.02 mmol) and **1i** (110.1 mg, 0.40 mmol) in toluene (2 mL) at rt for 4 h afforded **3i** (83.5 mg, 81%), which was stored in a refrigerator to produce the solid state product: a pall white solid, m.p. 139-140 °C ( $\text{CH}_2\text{Cl}_2/n\text{-hexane}$ );  $^1\text{H}$  NMR (300 MHz,  $\text{CDCl}_3$ )  $\delta$  8.12 (t,  $J = 8.4$  Hz, 2H), 7.73 (d,  $J = 7.2$  Hz, 2H), 7.58 (s, 1H), 7.56-7.44 (m, 4H), 7.43-7.31 (m, 2H), 7.30-7.19 (m, 1H), 3.88 (s, 3H);  $^{13}\text{C}$  NMR (75 MHz,  $\text{CDCl}_3$ )  $\delta$  142.2, 141.44, 141.42, 139.1, 128.7, 127.5, 127.0, 125.6, 122.5, 122.0, 120.5, 120.3, 119.0, 118.5, 108.4, 107.0, 29.0; IR (KBr)  $\nu$  ( $\text{cm}^{-1}$ ) 3050, 2927, 1626, 1599, 1561, 1491, 1465, 1454, 1439, 1421, 1360, 1341, 1324, 1248, 1225, 1160, 1124, 1076, 1060, 1017; MS (70 ev, EI)  $m/z$  (%) 258 ( $\text{M}^+ + 1$ , 20.65), 257 ( $\text{M}^+$ , 100); HRMS Calcd for  $\text{C}_{19}\text{H}_{15}\text{N}$  ( $\text{M}^+$ ): 257.1204, Found: 257.1203.

**(10) 2-Butyl-9-methyl-9H-carbazole (3j)**

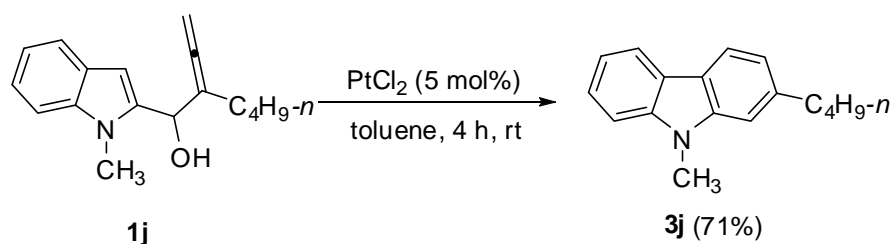

The reaction of  $\text{PtCl}_2$  (5.2 mg, 0.02 mmol) and **1j** (102.1 mg, 0.40 mmol) in toluene (2 mL) at rt for 4 h afforded **3j** (67.2 mg, 71%) (petroleum ether/ethyl acetate = 50/1): liquid;  $^1\text{H}$  NMR (300 MHz,  $\text{CDCl}_3$ )  $\delta$  8.03 (dt,  $J = 7.8$  and 0.9 Hz, 1H), 7.97 (d,  $J = 7.8$  Hz, 1H), 7.48-7.38 (m, 1H), 7.37-7.30 (m, 1H), 7.24-7.15 (m, 2H), 7.05 (dd,  $J = 7.8$  and 1.5 Hz, 1H), 3.78 (s, 3H), 2.81 (t,  $J = 7.8$  Hz, 2H), 1.78-1.63 (m, 2H), 1.48-1.33 (m, 2H), 0.96 (t,  $J = 7.2$  Hz, 3H);  $^{13}\text{C}$  NMR (75 MHz,  $\text{CDCl}_3$ )  $\delta$  141.3,

141.0, 125.0, 122.8, 120.6, 119.9, 119.7, 118.6, 108.2, 107.9, 36.5, 34.3, 28.9, 22.5, 14.0; IR (neat)  $\nu$  ( $\text{cm}^{-1}$ ) 3054, 3025, 2955, 2928, 2857, 1631, 1603, 1564, 1468, 1455, 1420, 1377, 1360, 1337, 1322, 1248, 1156, 1132, 1118, 1000; MS (70 ev, EI)  $m/z$  (%) 238 ( $M^+ + 1$ , 28.31), 237 ( $M^+$ , 34.88), 44 (100); HRMS Calcd for  $\text{C}_{17}\text{H}_{19}\text{N}$  ( $M^+$ ): 237.1517, Found: 237.1516.

**(11) 2-Allyl-9-ethyl-9H-carbazole (3k)**

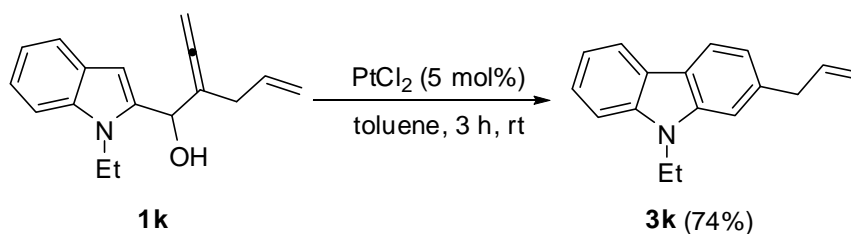

The reaction of  $\text{PtCl}_2$  (5.3 mg, 0.02 mmol) and **1k** (100.2 mg, 0.39 mmol) in toluene (2 mL) at rt for 3 h afforded **3k** (69.2 mg, 74%) (petroleum ether/ethyl acetate = 80/1): liquid;  $^1\text{H}$  NMR (300 MHz,  $\text{CDCl}_3$ )  $\delta$  8.30-8.15 (m, 2H), 7.67-7.55 (m, 1H), 7.51 (d,  $J = 8.1$  Hz, 1H), 7.45-7.35 (m, 2H), 7.30-7.21 (m, 1H), 6.39-7.21 (m, 1H), 5.43-5.25 (m, 2H), 4.43 (q,  $J = 7.2$  Hz, 2H), 3.79 (d,  $J = 6.3$  Hz, 2H), 1.54 (t,  $J = 7.2$  Hz, 3H);  $^{13}\text{C}$  NMR (75 MHz,  $\text{CDCl}_3$ )  $\delta$  140.2, 139.9, 137.9, 137.8, 125.1, 122.8, 121.1, 120.2, 120.1, 119.7, 118.6, 115.6, 108.3, 108.1, 40.9, 37.2, 13.7; IR (neat)  $\nu$  ( $\text{cm}^{-1}$ ) 3057, 2975, 2932, 2895, 1629, 1601, 1572, 1496, 1479, 1469, 1460, 1378, 1336, 1327, 1236, 1177, 1156, 1132, 1119, 1086, 1058, 1020, 1000; MS (70 ev, EI)  $m/z$  (%) 236 ( $M^+ + 1$ , 14.21), 235 ( $M^+$ , 99.55), 234 ( $M^+ - \text{H}$ , 100); HRMS Calcd for  $\text{C}_{17}\text{H}_{17}\text{N}$  ( $M^+$ ): 235.1361, Found: 235.1360.

**(12) 9-Ethyl-2-phenyl-6-methyl-9H-carbazole (3l)**

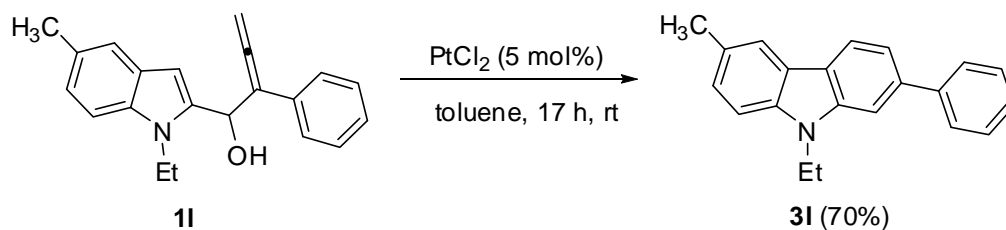

The reaction of PtCl<sub>2</sub> (4.2 mg, 0.016 mmol) and **1l** (91.5 mg, 0.30 mmol) in toluene (1.5 mL) at rt for 17 h afforded **3l** (60.2 mg, 70%), which was stored in a refrigerator to produce the solid state product: a pall yellow solid, m.p. 107-108 °C (CH<sub>2</sub>Cl<sub>2</sub>/*n*-hexane); <sup>1</sup>H NMR (300 MHz, CDCl<sub>3</sub>) δ 8.13 (d, *J* = 7.8 Hz, 1H), 7.93 (s, 1H), 7.80-7.70 (m, 2H), 7.58 (d, *J* = 1.2 Hz, 1H), 7.55-7.44 (m, 3H), 7.43-7.28 (m, 3H), 4.41 (q, *J* = 7.2 Hz, 2H), 2.57 (s, 3H), 1.46 (t, *J* = 7.2 Hz, 3H); <sup>13</sup>C NMR (75 MHz, CDCl<sub>3</sub>) δ 142.3, 140.6, 138.9, 138.7, 128.7, 128.2, 127.6, 127.0, 126.9, 122.8, 122.0, 120.5, 120.4, 118.2, 108.1, 106.9, 37.5, 21.4, 13.8; IR (neat) ν (cm<sup>-1</sup>) 3027, 2974, 2918, 1600, 1563, 1486, 1469, 1439, 1367, 1339, 1298, 1236, 1224, 1149, 1088; MS (70 ev, EI) *m/z* (%) 286 (M<sup>+</sup>+1, 19.40), 285 (M<sup>+</sup>, 84.33), 270 (M<sup>+</sup>-CH<sub>3</sub>, 100); HRMS Calcd for C<sub>21</sub>H<sub>19</sub>N (M<sup>+</sup>): 285.1517, Found: 285.1527.

**(13) 2,9-Diphenyl-9H-carbazole (3m)**

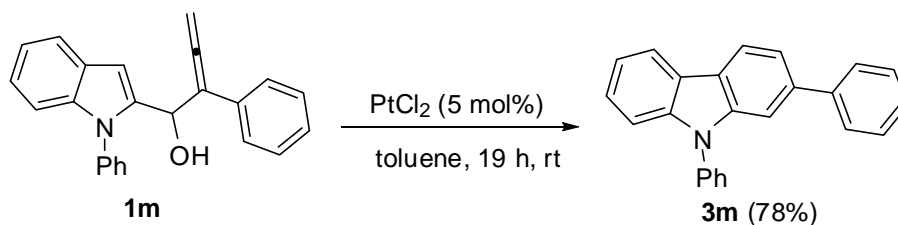

The reaction of PtCl<sub>2</sub> (4.1 mg, 0.015 mmol) and **1m** (100.0 mg, 0.30 mmol) in toluene (1.5 mL) at rt for 19 h afforded **3m** (74.3 mg, 78%), which was stored in a

refrigerator to produce the solid state product: a pall yellow solid, m.p. 118-119 °C (CH<sub>2</sub>Cl<sub>2</sub>/*n*-hexane); <sup>1</sup>H NMR (300 MHz, CDCl<sub>3</sub>) δ 8.28-8.13 (m, 2H), 7.75-7.741 (m, 13H), 7.40-7.28 (m, 2H); <sup>13</sup>C NMR (75 MHz, CDCl<sub>3</sub>) δ 141.9, 141.39, 141.38, 139.4, 137.6, 129.9, 128.7, 127.5, 127.2, 127.0, 125.9, 123.1, 122.5, 120.5, 120.3, 120.0, 119.6, 109.8, 108.2; IR (neat) ν (cm<sup>-1</sup>) 3059, 1626, 1598, 1558, 1501, 1484, 1457, 1428, 1364, 1339, 1319, 1236, 1218, 1127, 1073; MS (70 ev, EI) *m/z* (%) 320 (M<sup>+</sup>+1, 25.63), 319 (M<sup>+</sup>, 100); HRMS Calcd for C<sub>24</sub>H<sub>17</sub>N (M<sup>+</sup>): 319.1361, Found: 319.1374.

**(14) Methyl 9-ethyl-9*H*-carbazole-2-carboxylate (3n)**

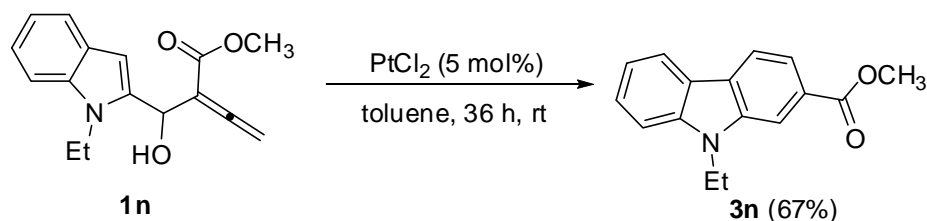

The reaction of PtCl<sub>2</sub> (4.1 mg, 0.015 mmol) and **1n** (83.0 mg, 0.3 mmol) in toluene (1.5 mL) at rt for 36 h afforded **3n** (51.8 mg, 67%) (petroleum ether/ethyl acetate = 20/1): liquid; <sup>1</sup>H NMR (300 MHz, CDCl<sub>3</sub>) δ 8.15-8.02 (m, 3H), 7.89 (dd, *J* = 8.1 and 1.2 Hz, 1H), 7.55-7.44 (m, 1H), 7.38 (d, *J* = 8.4 Hz, 1H), 7.26-7.17 (m, 1H), 4.36 (q, *J* = 7.2 Hz, 2H), 3.95 (s, 3H), 1.40 (t, *J* = 7.2 Hz, 3H); <sup>13</sup>C NMR (75 MHz, CDCl<sub>3</sub>) δ 167.9, 141.1, 139.2, 126.94, 126.86, 126.5, 122.0, 121.1, 119.93, 119.90, 119.2, 110.2, 108.8, 52.1, 37.6, 13.9; IR (neat) ν (cm<sup>-1</sup>) 3057, 2976, 2950, 1715, 1628, 1600, 1572, 1480, 1443, 1380, 1341, 1328, 1303, 1284, 1254, 1231, 1218, 1157, 1131, 1098, 1057; MS (70 ev, EI) *m/z* (%) 254 (M<sup>+</sup>+1, 11.02), 253 (M<sup>+</sup>, 62.47), 238

( $M^+ - CH_3$ , 100); HRMS Calcd for  $C_{16}H_{15}NO_2$  ( $M^+$ ): 253.1103, Found: 253.1095.

**(15) *N,N*-Dimethyl 9-Ethyl-9*H*-carbazole-2-carboxamide (**3o**)**

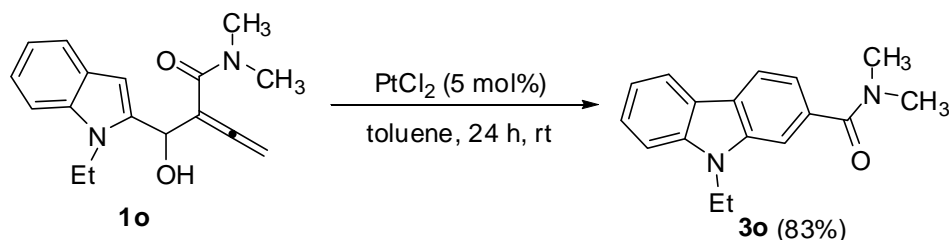

The reaction of  $PtCl_2$  (4.1 mg, 0.015 mmol) and **1o** (92.1 mg, 0.3 mmol) in toluene (1.5 mL) at rt for 24 h afforded **3o** (71.6 mg, 83%) (petroleum ether/ethyl acetate = 3/1~1/1): liquid;  $^1H$  NMR (300 MHz,  $CDCl_3$ )  $\delta$  8.16-8.04 (m, 2H), 7.60-7.39 (m, 3H), 7.30-7.20 (m, 2H), 4.38 (q,  $J = 7.2$  Hz, 2H), 3.17 (s, 3H), 3.06 (s, 3H), 1.43 (t,  $J = 7.2$  Hz, 3H);  $^{13}C$  NMR (75 MHz,  $CDCl_3$ )  $\delta$  172.5, 140.5, 139.4, 133.3, 126.2, 123.8, 122.3, 120.7, 120.0, 119.1, 117.6, 108.6, 107.8, 39.9, 37.6, 35.5, 13.8; IR (neat)  $\nu$  ( $cm^{-1}$ ) 2973, 2931, 1631, 1566, 1483, 1477, 1444, 1391, 1327, 1260, 1234, 1196, 1157, 1077; MS (70 ev, EI)  $m/z$  (%) 267 ( $M^+ + 1$ , 10.46), 266 ( $M^+$ , 55.07), 222 ( $M^+ - C_2H_6N$ , 100); HRMS Calcd for  $C_{17}H_{18}N_2O$  ( $M^+$ ): 266.1419, Found: 266.1418.

**(16) (9-Ethyl-9*H*-carbazol-2-yl)methanol (**3p**)**

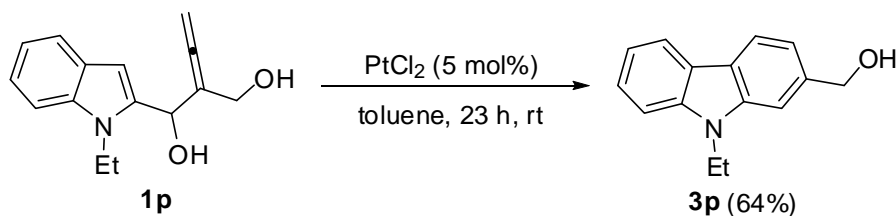

The reaction of  $PtCl_2$  (5.3 mg, 0.02 mmol) and **1p** (96.2 mg, 0.4 mmol) in toluene (2.0 mL) at rt for 23 h afforded **3p** (57.4 mg, 64%) (petroleum ether/ethyl

acetate = 10/1~3/1): liquid;  $^1\text{H}$  NMR (300 MHz,  $\text{CDCl}_3$ )  $\delta$  8.05 (d,  $J = 7.8$  Hz, 1H), 8.00 (d,  $J = 7.8$  Hz, 1H), 7.50-7.38 (m, 1H), 7.37-7.30 (m, 2H), 7.26-7.16 (m, 1H), 7.13 (d,  $J = 8.1$  Hz, 1H), 4.81 (s, 2H), 4.25 (q,  $J = 7.2$  Hz, 2H), 2.26 (bs, 1H), 1.35 (t,  $J = 7.2$  Hz, 3H);  $^{13}\text{C}$  NMR (75 MHz,  $\text{CDCl}_3$ )  $\delta$  140.1, 140.0, 138.6, 125.5, 122.6, 122.3, 120.33, 120.29, 118.7, 117.8, 108.4, 106.8, 65.9, 37.3, 13.7; IR (neat)  $\nu$  ( $\text{cm}^{-1}$ ) 3345, 3053, 2975, 2932, 2872, 1629, 1601, 1572, 1498, 1479, 1470, 1443, 1379, 1327, 1236, 1178, 1156, 1133, 1086, 1001; MS (70 eV, EI)  $m/z$  (%) 226 ( $\text{M}^+ + 1$ , 11.89), 225 ( $\text{M}^+$ , 72.38), 210 ( $\text{M}^+ - \text{CH}_3$ , 100); HRMS Calcd for  $\text{C}_{15}\text{H}_{15}\text{NO}$  ( $\text{M}^+$ ): 225.1154, Found: 225.1156.

**(17) (9-Ethyl-5-methyl-9H-carbazol-2-yl)methanol (3q)**

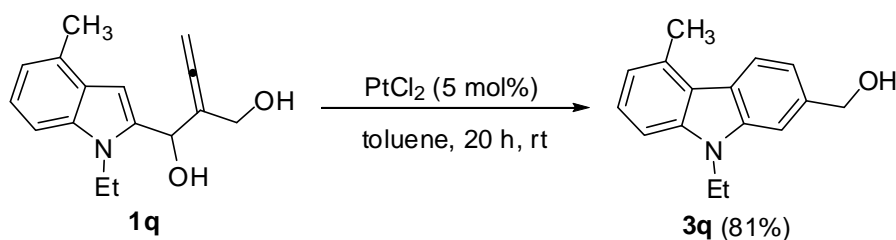

The reaction of  $\text{PtCl}_2$  (5.40 mg, 0.02 mmol) and **1q** (102.5 mg, 0.4 mmol) in toluene (2.0 mL) at rt for 20 h afforded **3q** (77.4 mg, 81%) (petroleum ether/ethyl acetate = 10/1~3/1): liquid;  $^1\text{H}$  NMR (300 MHz,  $\text{CDCl}_3$ )  $\delta$  8.18 (d,  $J = 7.8$  Hz, 1H), 7.52-7.40 (m, 2H), 7.30 (d,  $J = 8.1$  Hz, 1H), 7.23 (d,  $J = 8.1$  Hz, 1H), 7.18-7.05 (m, 1H), 4.90 (s, 2H), 4.32 (q,  $J = 7.2$  Hz, 2H), 2.94 (s, 4H), 1.43 (t,  $J = 7.2$  Hz, 3H);  $^{13}\text{C}$  NMR (75 MHz,  $\text{CDCl}_3$ )  $\delta$  140.1, 140.0, 137.9, 133.4, 125.3, 122.9, 122.6, 121.1, 120.4, 117.8, 106.5, 106.0, 65.9, 37.3, 20.8, 13.7; IR (neat)  $\nu$  ( $\text{cm}^{-1}$ ) 3334, 3049, 2974, 2933, 2872, 1624, 1597, 1489, 1469, 1447, 1379, 1322, 1274, 1253, 1222, 1187, 1165,

1152, 1138, 1105, 1080, 1012; MS (70 ev, EI)  $m/z$  (%) 240 ( $M^{+}+1$ , 12.90), 239 ( $M^{+}$ , 73.21), 224 ( $M^{+}-CH_3$ , 100); HRMS Calcd for  $C_{16}H_{17}NO$  ( $M^{+}$ ): 239.1310, Found: 239.1315.

**(18) (9-Ethyl-8-methyl-9H-carbazol-2-yl)methanol (3r)**

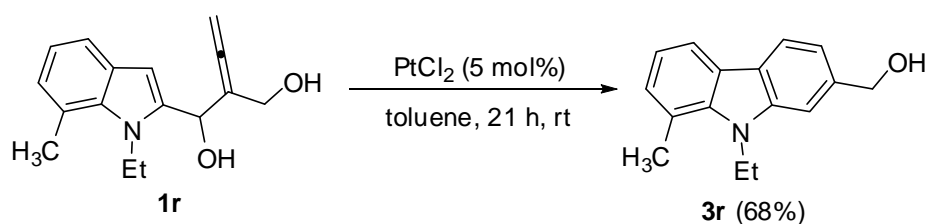

The reaction of  $PtCl_2$  (5.5 mg, 0.02 mmol) and **1r** (102.0 mg, 0.4 mmol) in toluene (2.0 mL) at rt for 21 h afforded **3r** (64.8 mg, 68%) (petroleum ether/ethyl acetate = 10/1~3/1): liquid;  $^1H$  NMR (300 MHz,  $CDCl_3$ )  $\delta$  8.04 (d,  $J$  = 7.8 Hz, 1H), 7.97 (d,  $J$  = 7.5 Hz, 1H), 7.40 (s, 2H), 7.25-7.10 (m, 3H), 4.87 (s, 1H), 4.52 (q,  $J$  = 7.0 Hz, 2H), 2.82 (s, 3H), 2.26 (bs, 1H), 1.41 (t,  $J$  = 7.0 Hz, 3H);  $^{13}C$  NMR (75 MHz,  $CDCl_3$ )  $\delta$  140.7, 138.8, 138.5, 128.8, 123.4, 122.6, 120.01, 119.95, 118.9, 118.1, 118.0, 107.0, 66.0, 39.2, 20.0, 15.6 ; IR (neat)  $\nu$  ( $cm^{-1}$ ) 3346, 3049, 2975, 2934, 2873, 1623, 1597, 1489, 1469, 1447, 1379, 1322, 1274, 1252, 1222, 1187, 1165, 1152, 1138, 1105, 1080, 1012; MS (70 ev, EI)  $m/z$  (%) 240 ( $M^{+}+1$ , 12.25), 239 ( $M^{+}$ , 67.62), 224 ( $M^{+}-CH_3$ , 100); HRMS Calcd for  $C_{16}H_{17}NO$  ( $M^{+}$ ): 239.1310, Found: 239.1311.

**(19) 9-Ethyl-9H-carbazole (3s)**

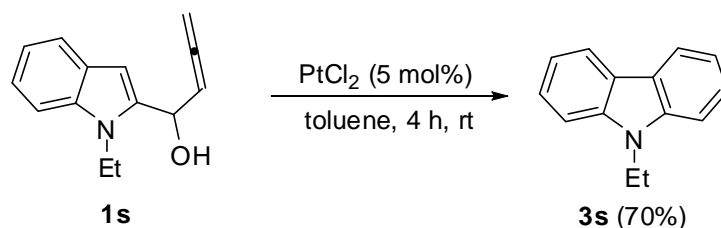

The reaction of  $\text{PtCl}_2$  (5.3 mg, 0.02 mmol) and **1s** (85.7 mg, 0.40 mmol) in toluene (2 mL) at rt for 4 h afforded **3s** (55.1 mg, 70%) (petroleum ether/ethyl acetate = 80/1): liquid;  $^1\text{H}$  NMR (300 MHz,  $\text{CDCl}_3$ )  $\delta$  8.10 (d,  $J = 7.8$  Hz, 2H), 7.52-7.36 (m, 4H), 7.23 (td,  $J = 7.2$  and 1.0 Hz, 2H), 4.36 (q,  $J = 7.2$  Hz, 2H), 1.42 (t,  $J = 7.2$  Hz, 3H);  $^{13}\text{C}$  NMR (75 MHz,  $\text{CDCl}_3$ )  $\delta$  139.9, 125.6, 122.9, 120.4, 118.7, 108.4, 37.4, 13.8; IR (neat)  $\nu$  ( $\text{cm}^{-1}$ ) 3423, 3051, 2975, 2925, 2877, 1627, 1598, 1484, 1469, 1454, 1381, 1345, 1327, 1231, 1153, 1130, 1120, 1086, 1053; MS (70 eV, EI)  $m/z$  (%) 196 ( $\text{M}^+ + 1$ , 9.34), 195 ( $\text{M}^+$ , 57.45), 180 ( $\text{M}^+ - \text{CH}_3$ , 100); HRMS Calcd for  $\text{C}_{14}\text{H}_{13}\text{N}$  ( $\text{M}^+$ ): 195.1048, Found: 195.1044.

## References

- [1] J. S. Cowie, P. D. Landor, S. R. Landor, *J. Chem. Soc., Perkin Trans. I* **1973**, 720.
- [2] D. N. Hickman, K. J. Hodgetts, P. S. Mackman, T. W. Wallace, J. M. Wardleworth, *Tetrahedron* **1996**, 52, 2235.
- [3] B. Alcaide, P. Almendros, C. Aragoncillo, M. C. Redondo, *Eur. J. Org. Chem.* **2005**, 98.
- [4] C. Park, P. H. Lee, *Org. Lett.* **2008**, 10, 3359.
- [5] J. Kuang, S. Ma, *J. Org. Chem.* **2009**, 74, 1763.

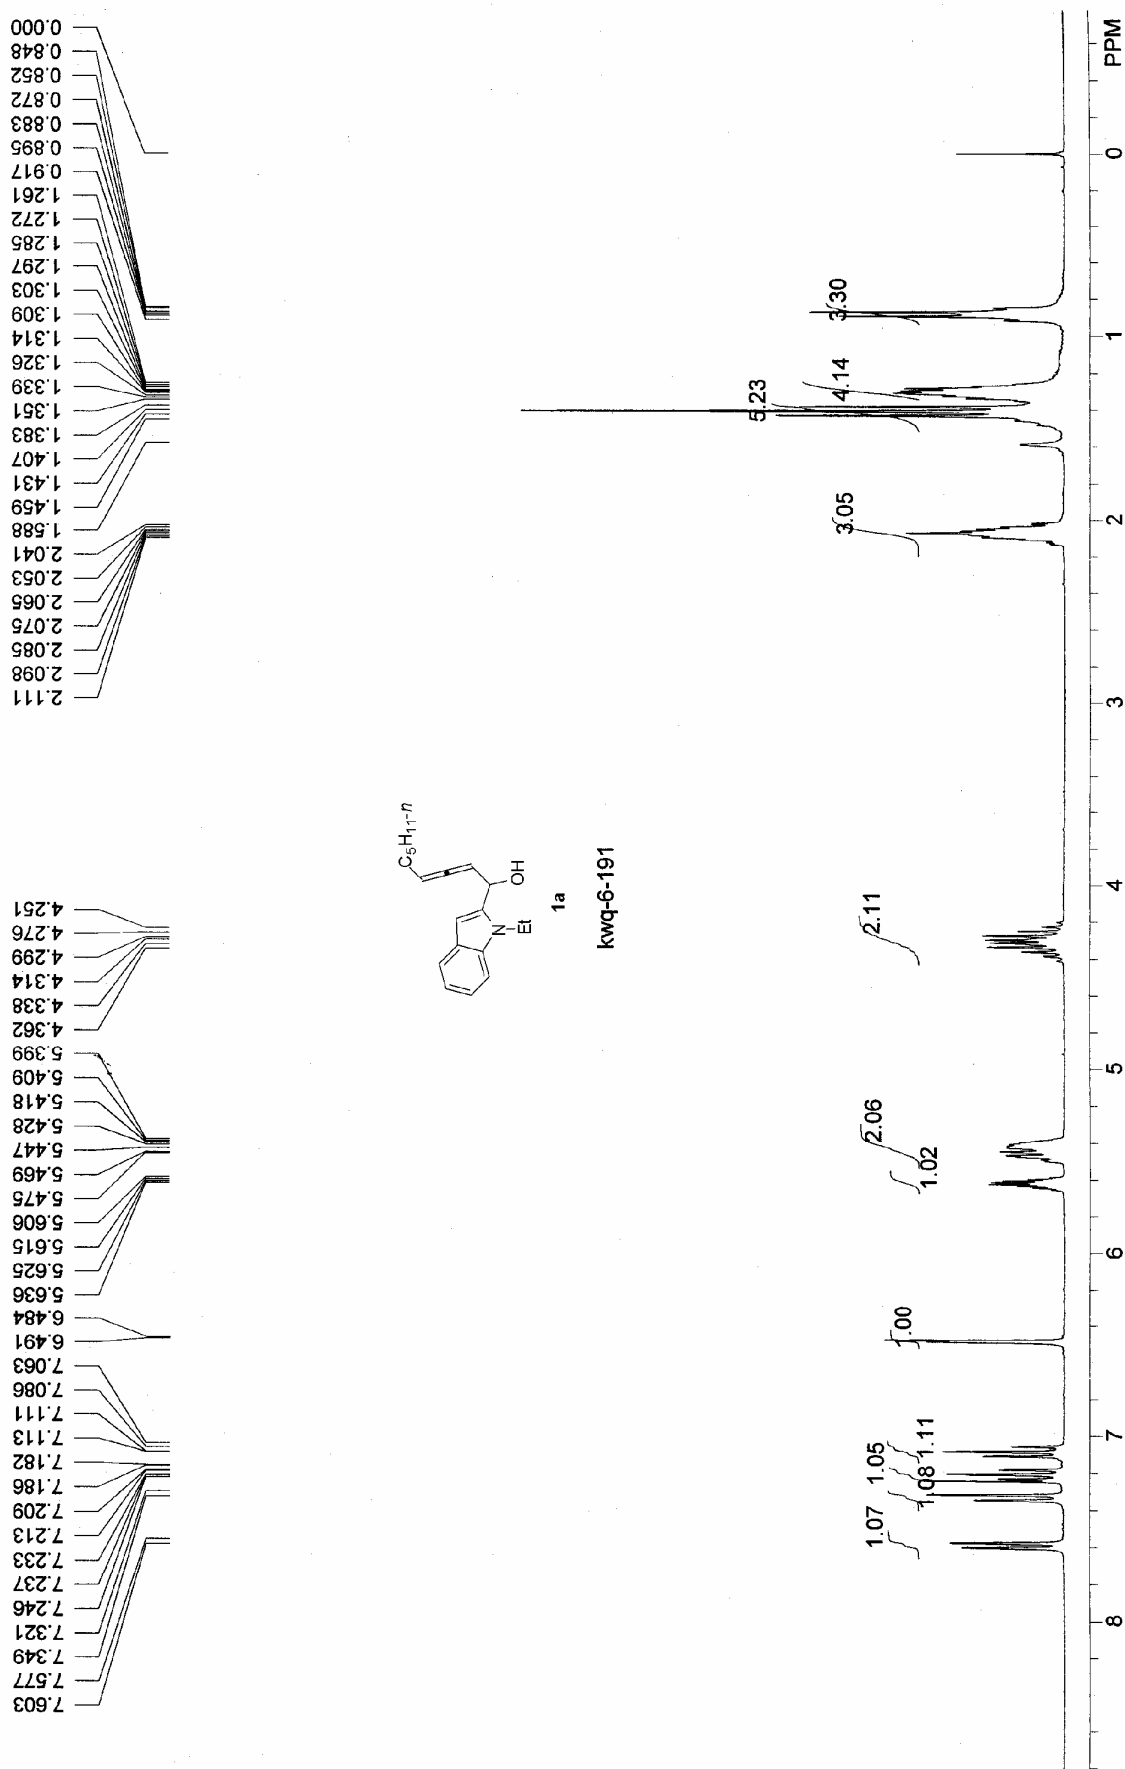

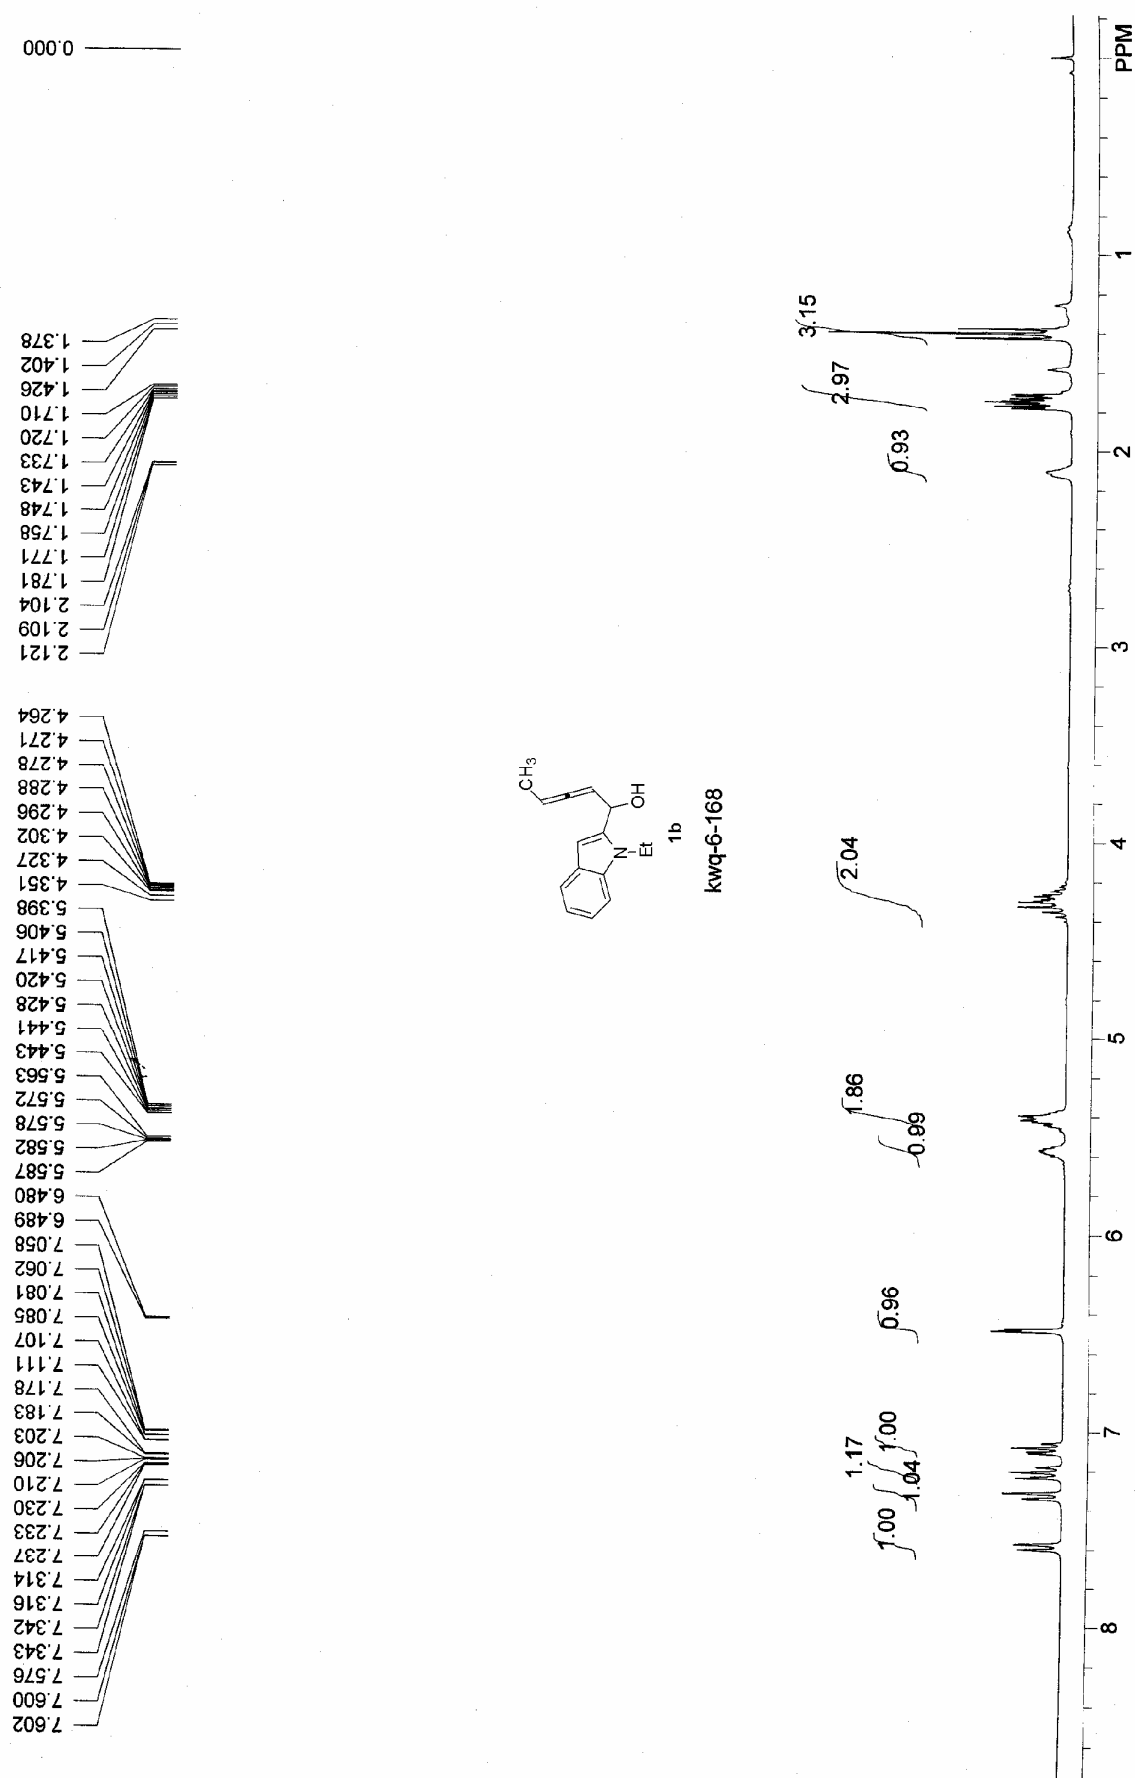

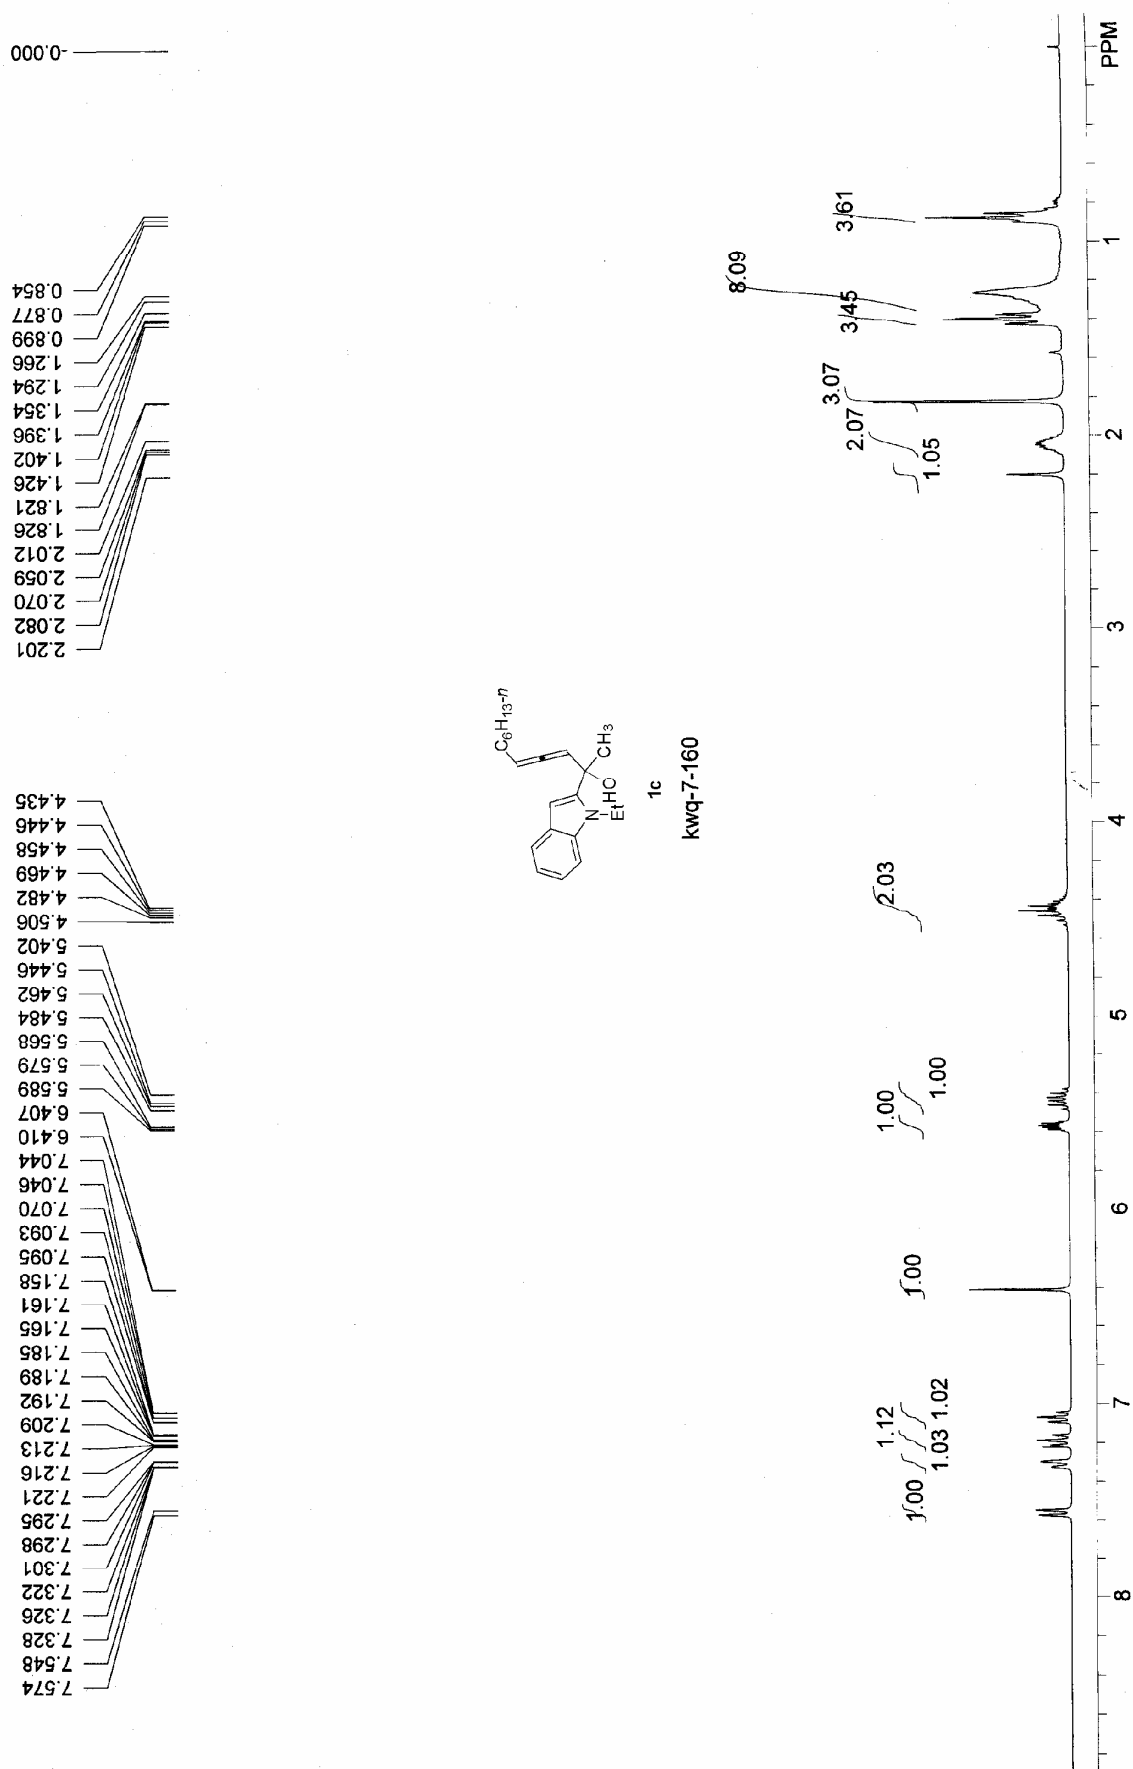

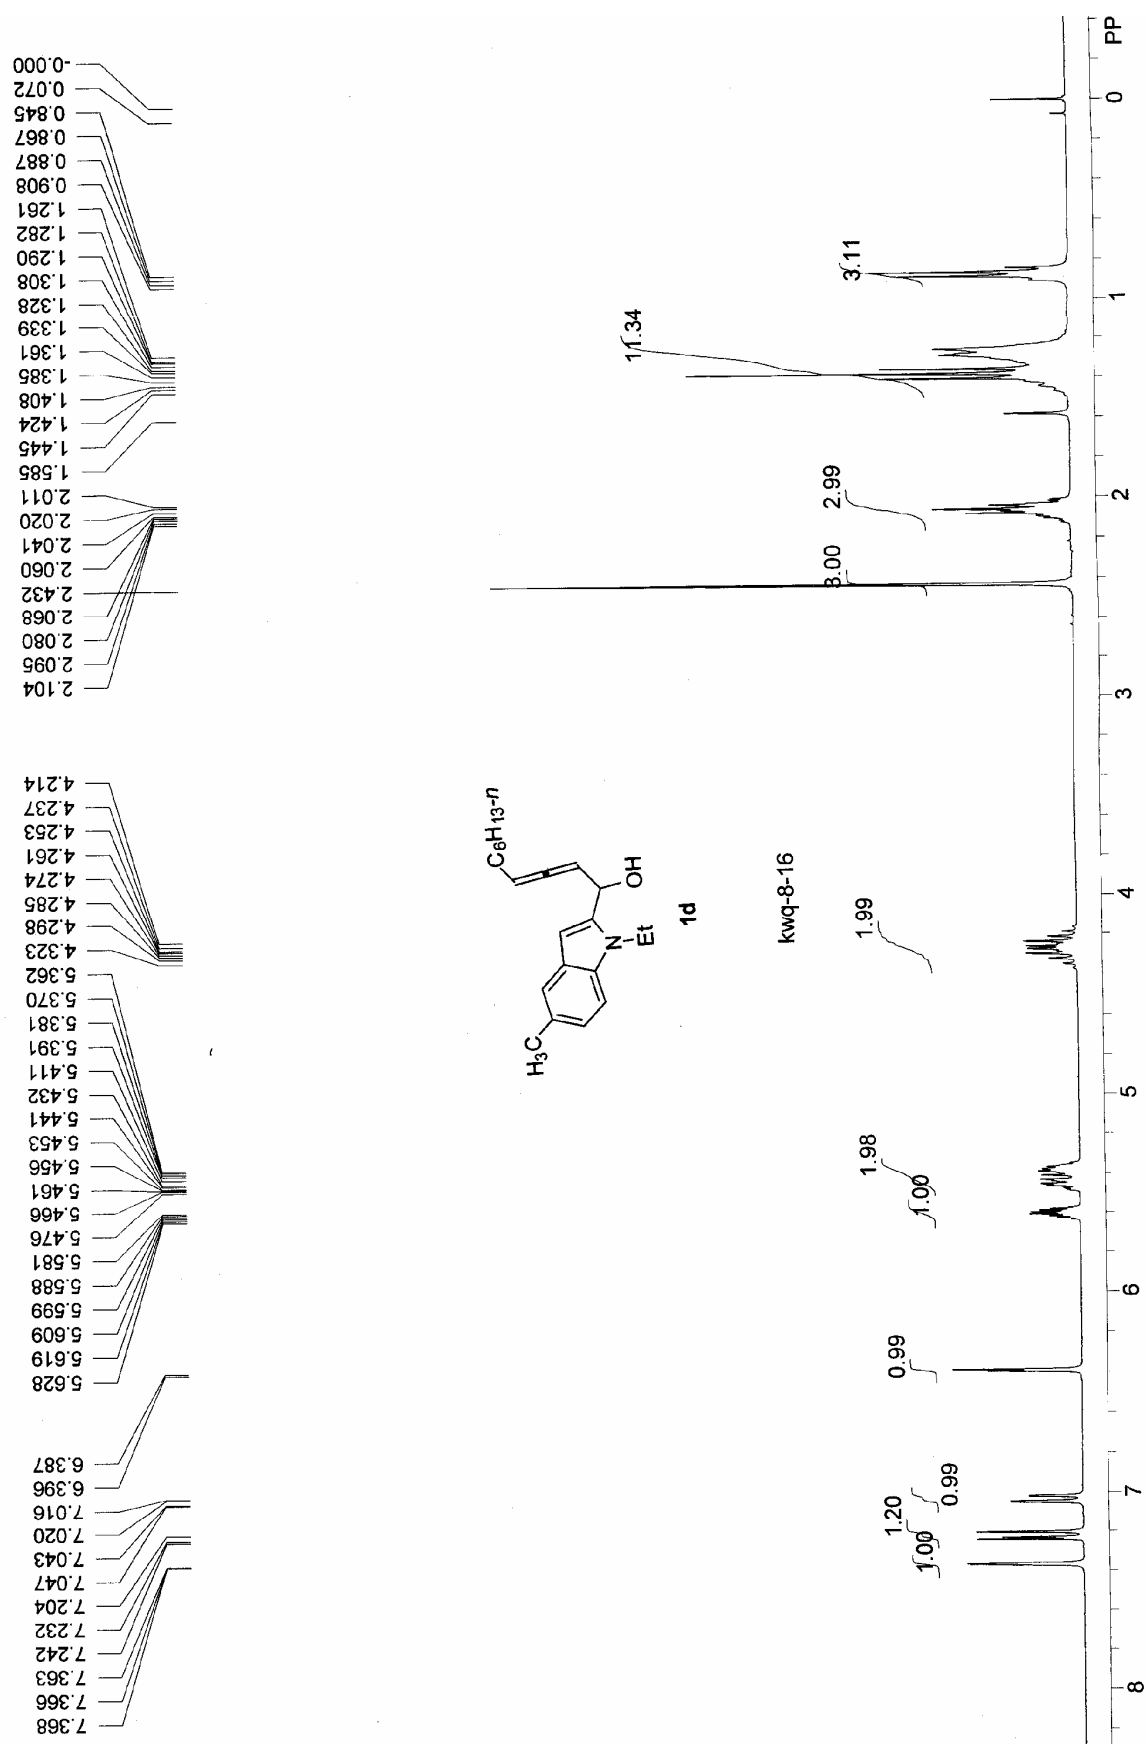

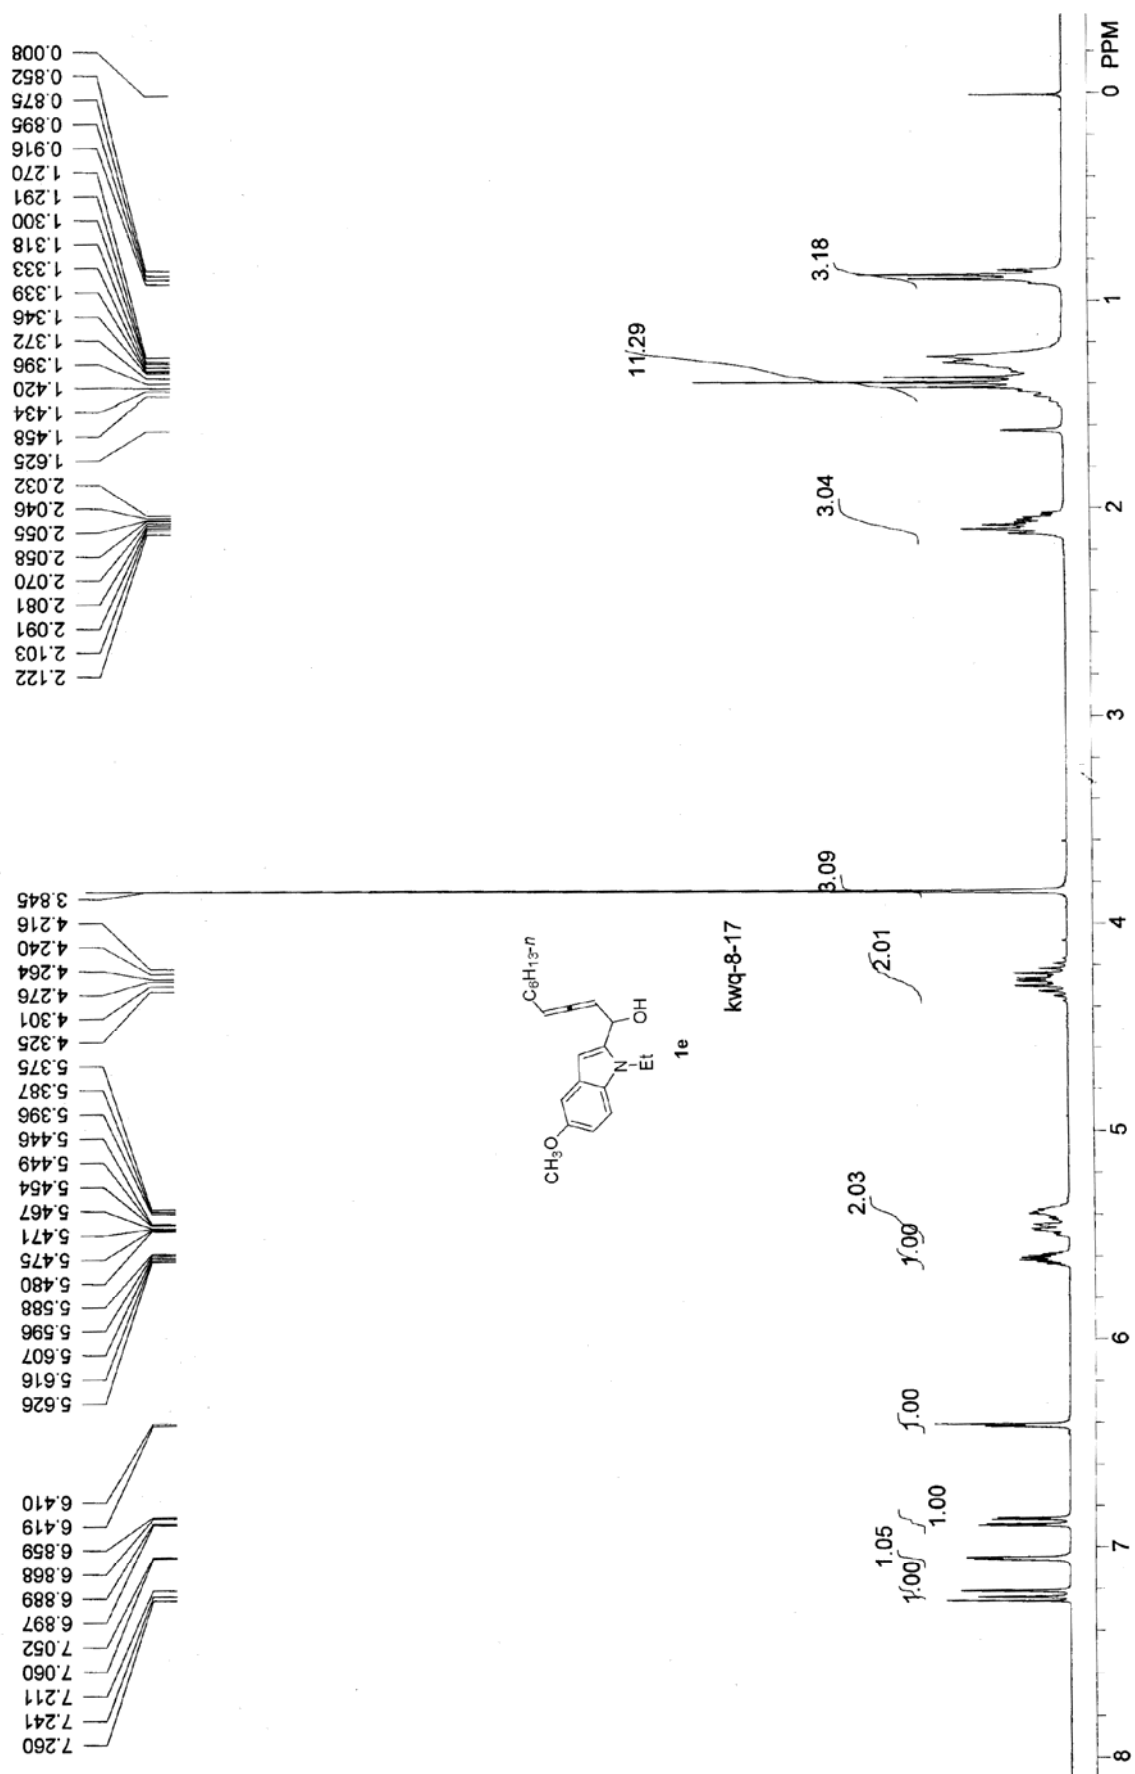

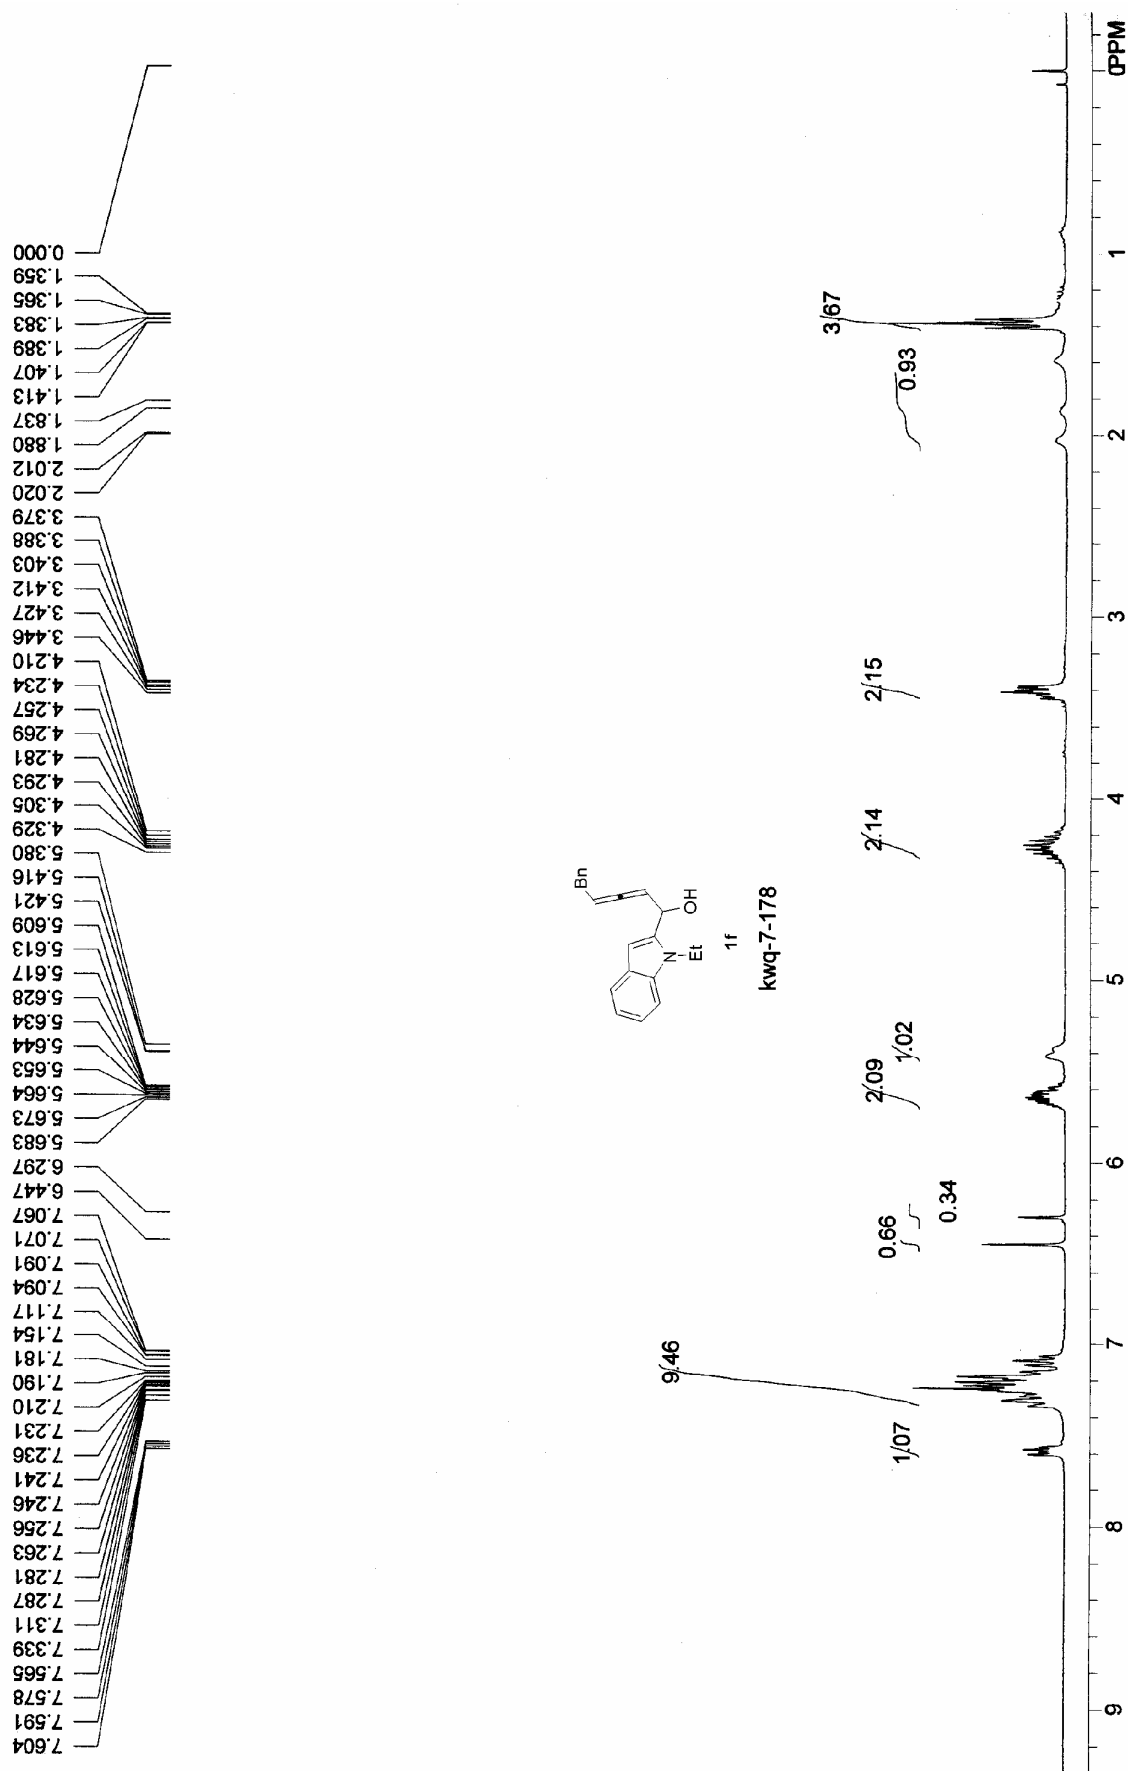

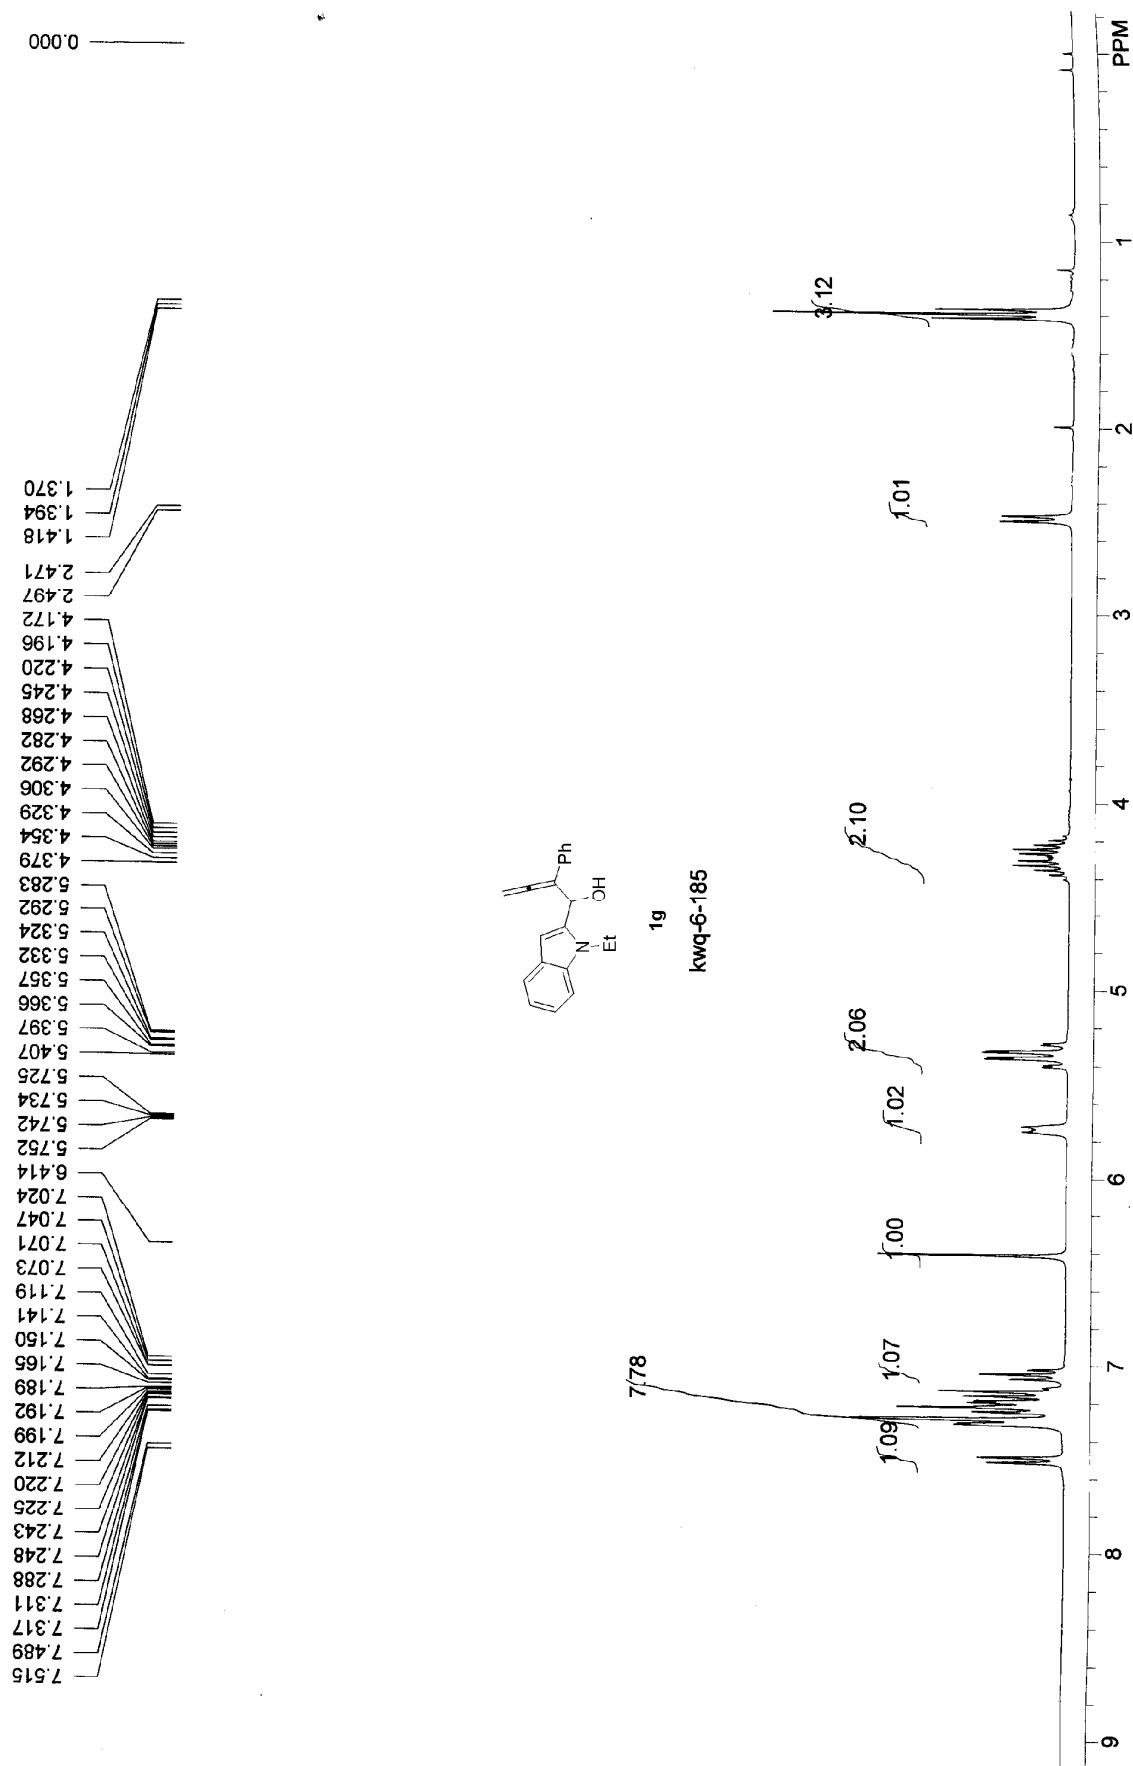

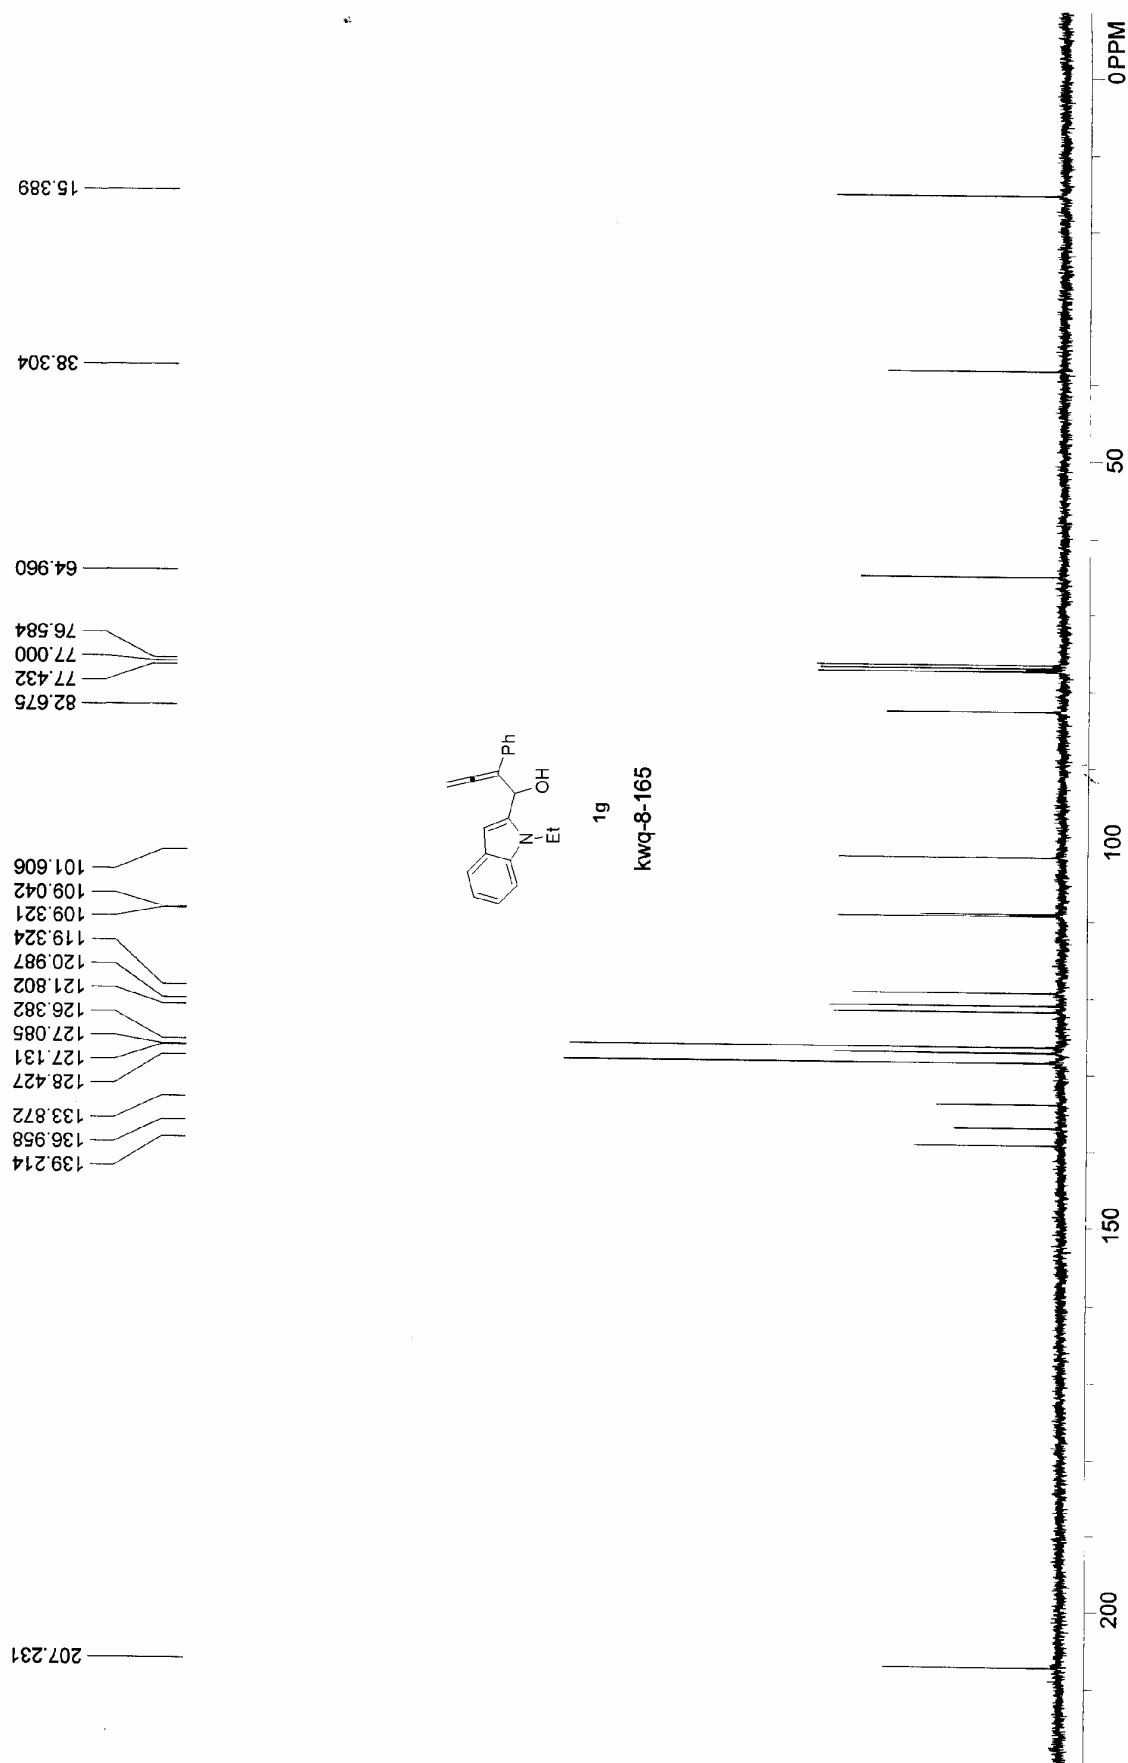

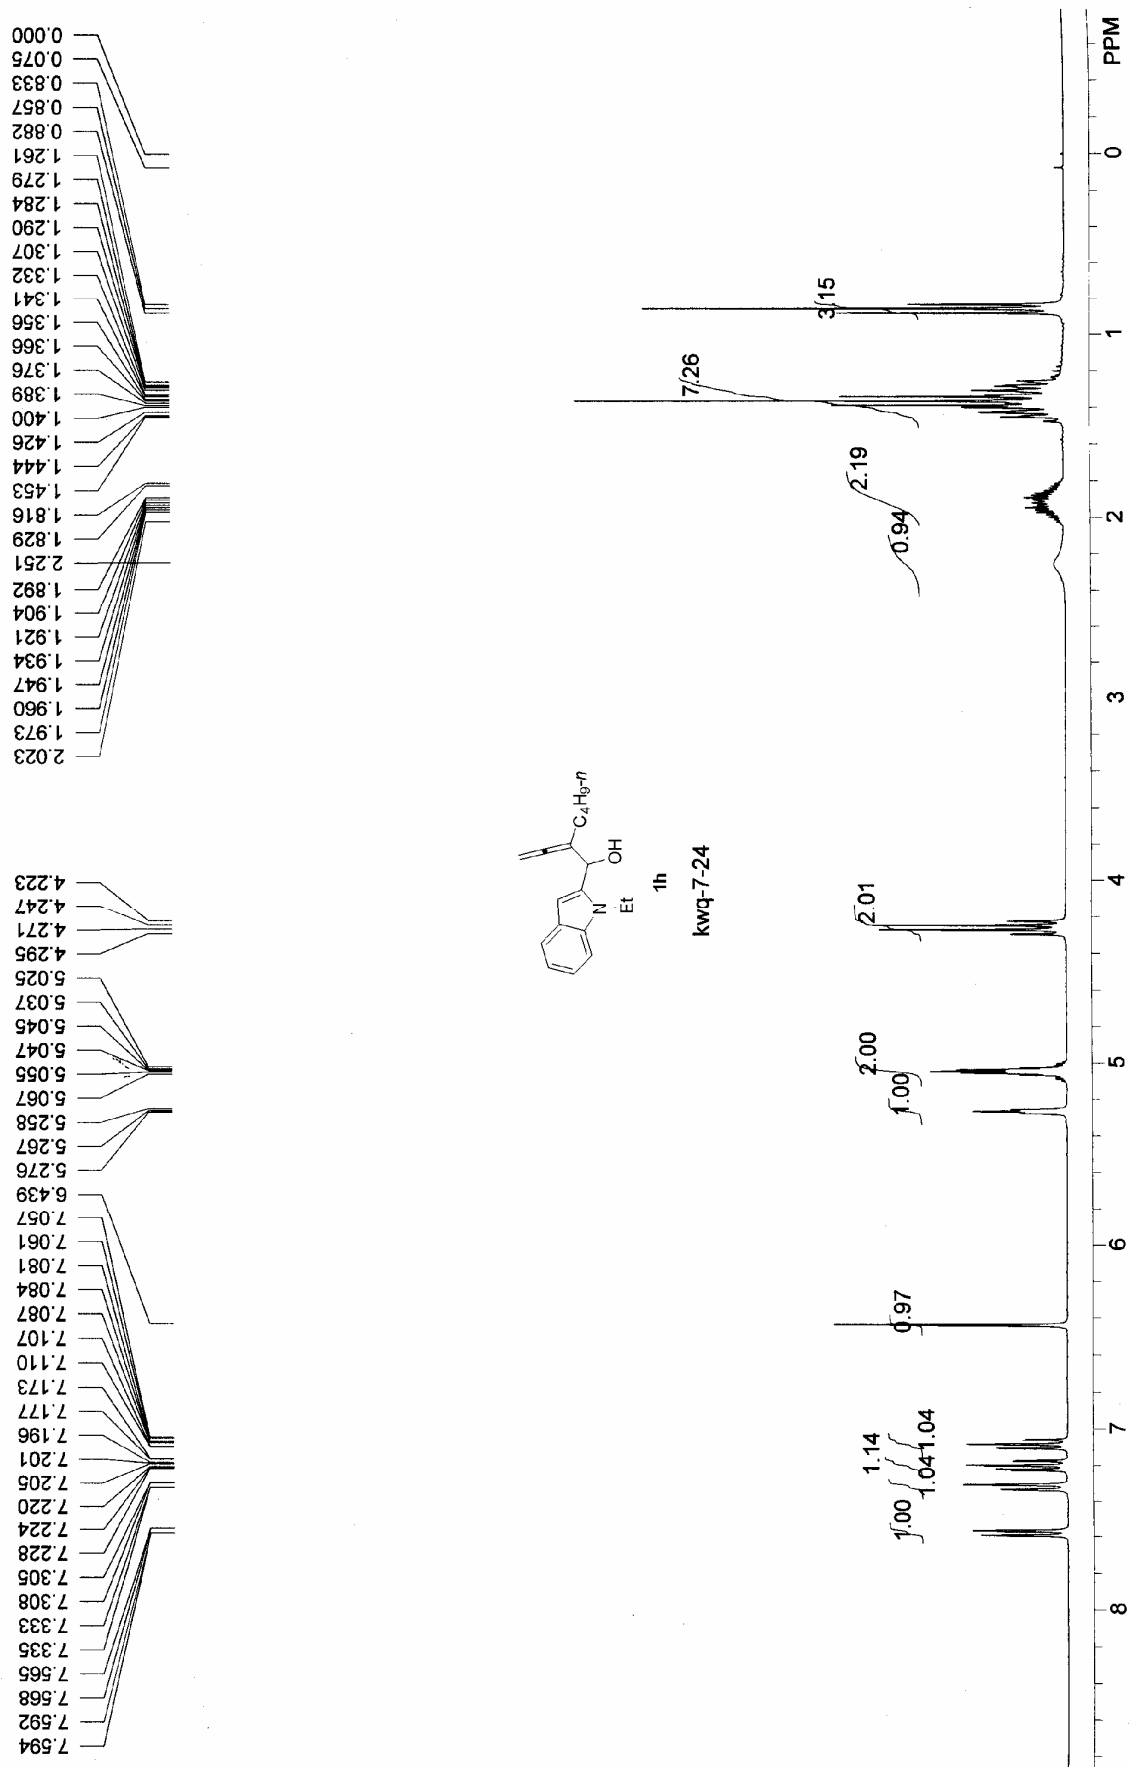

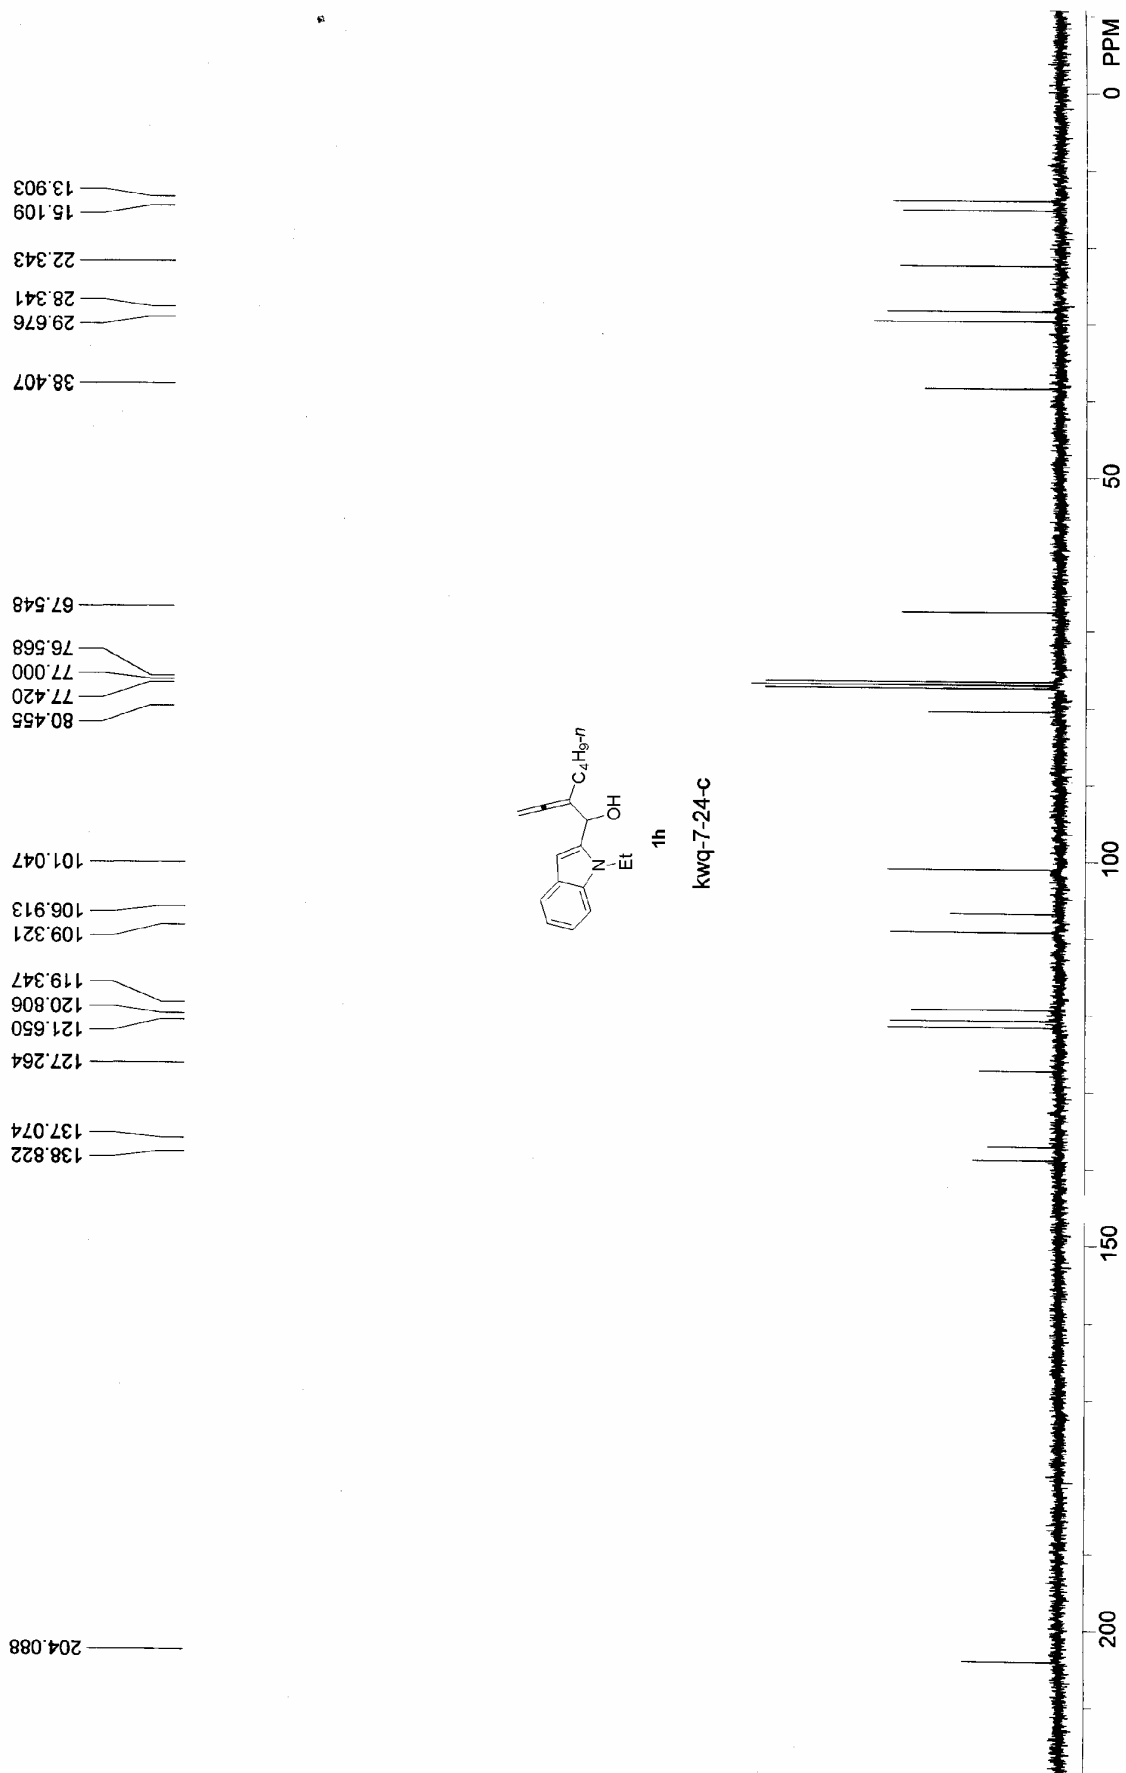

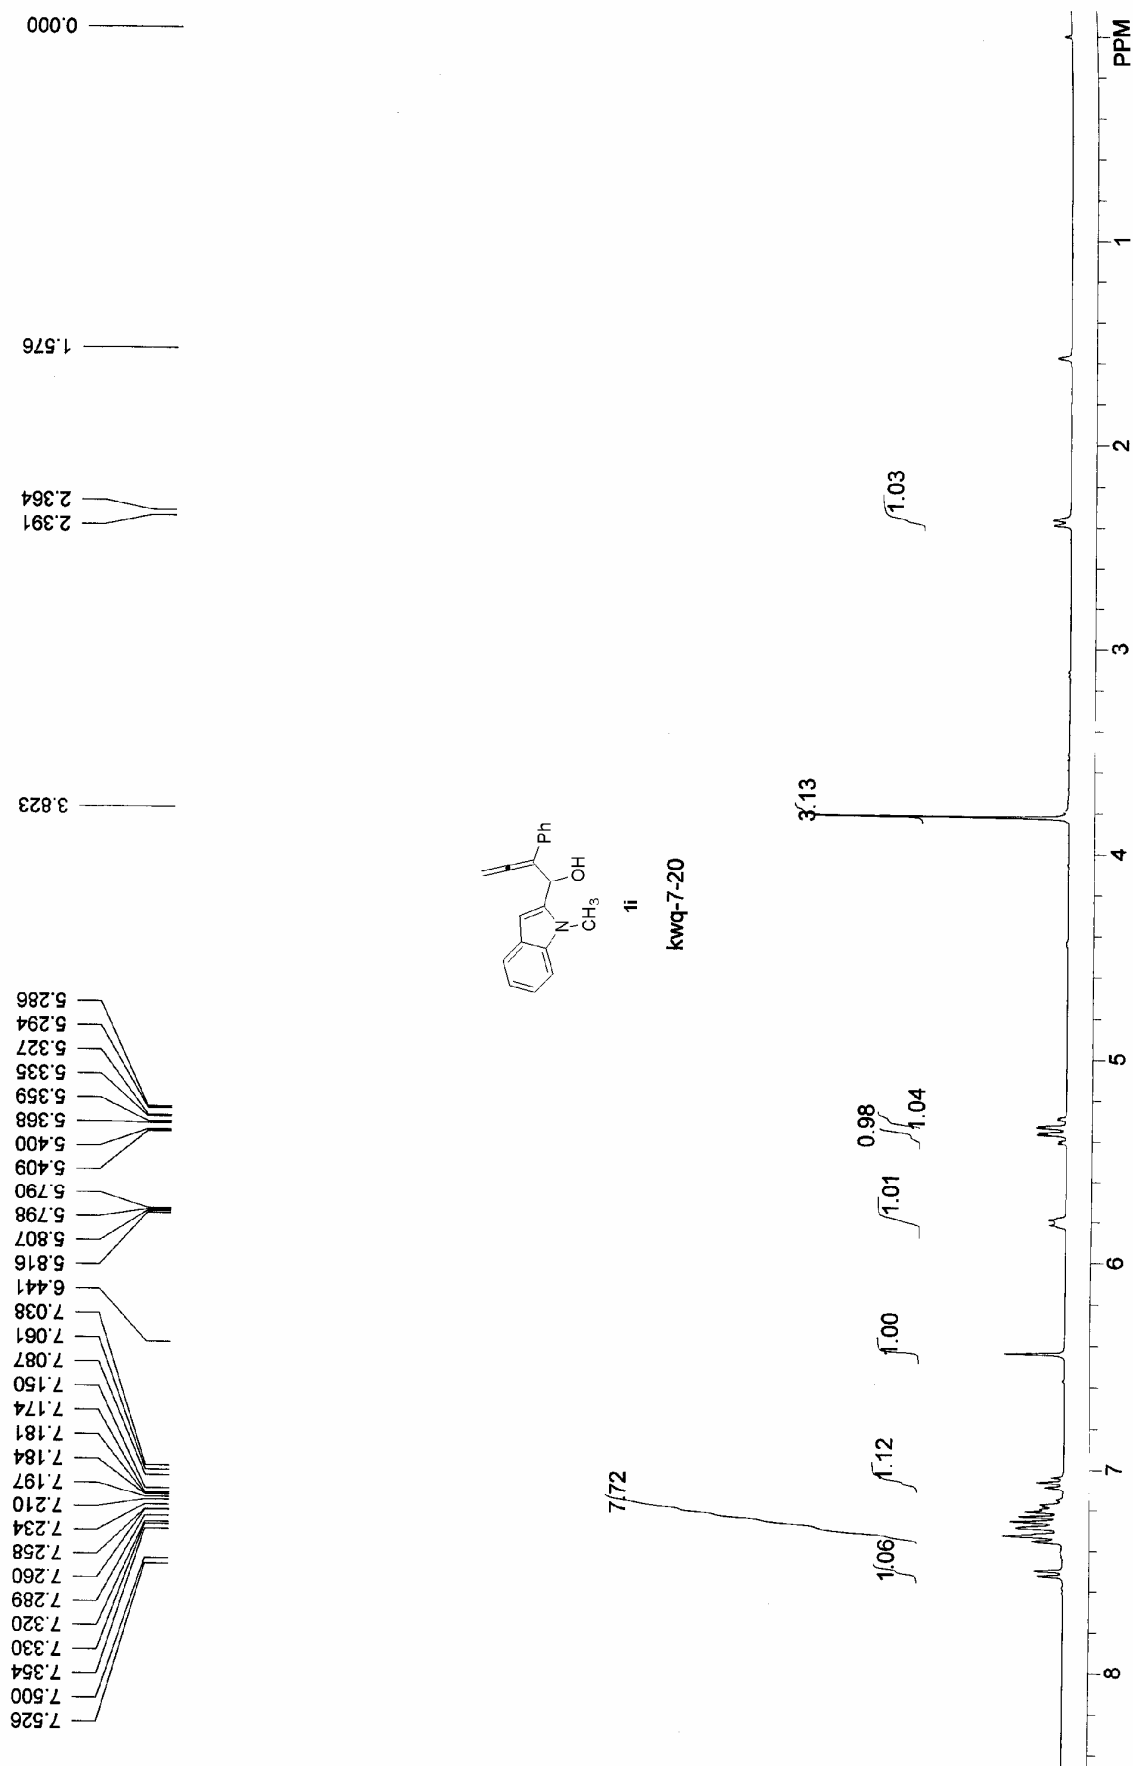

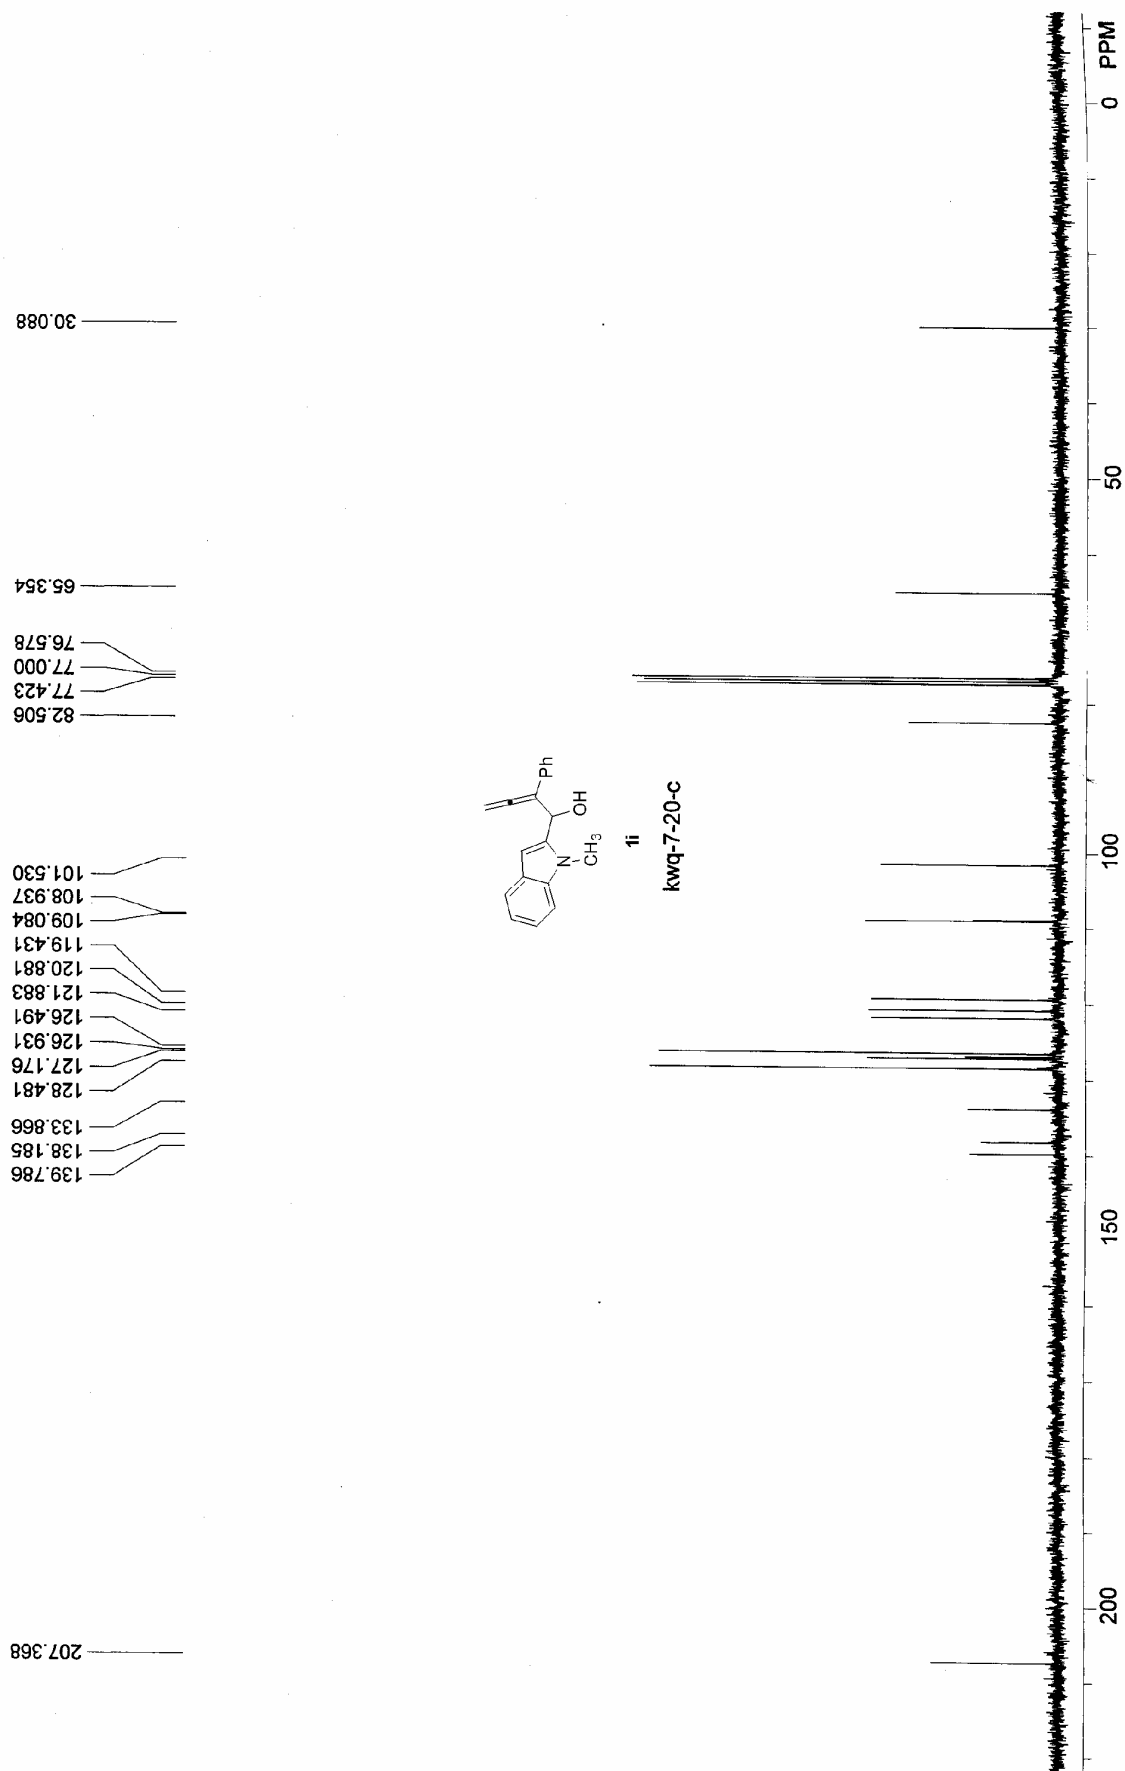

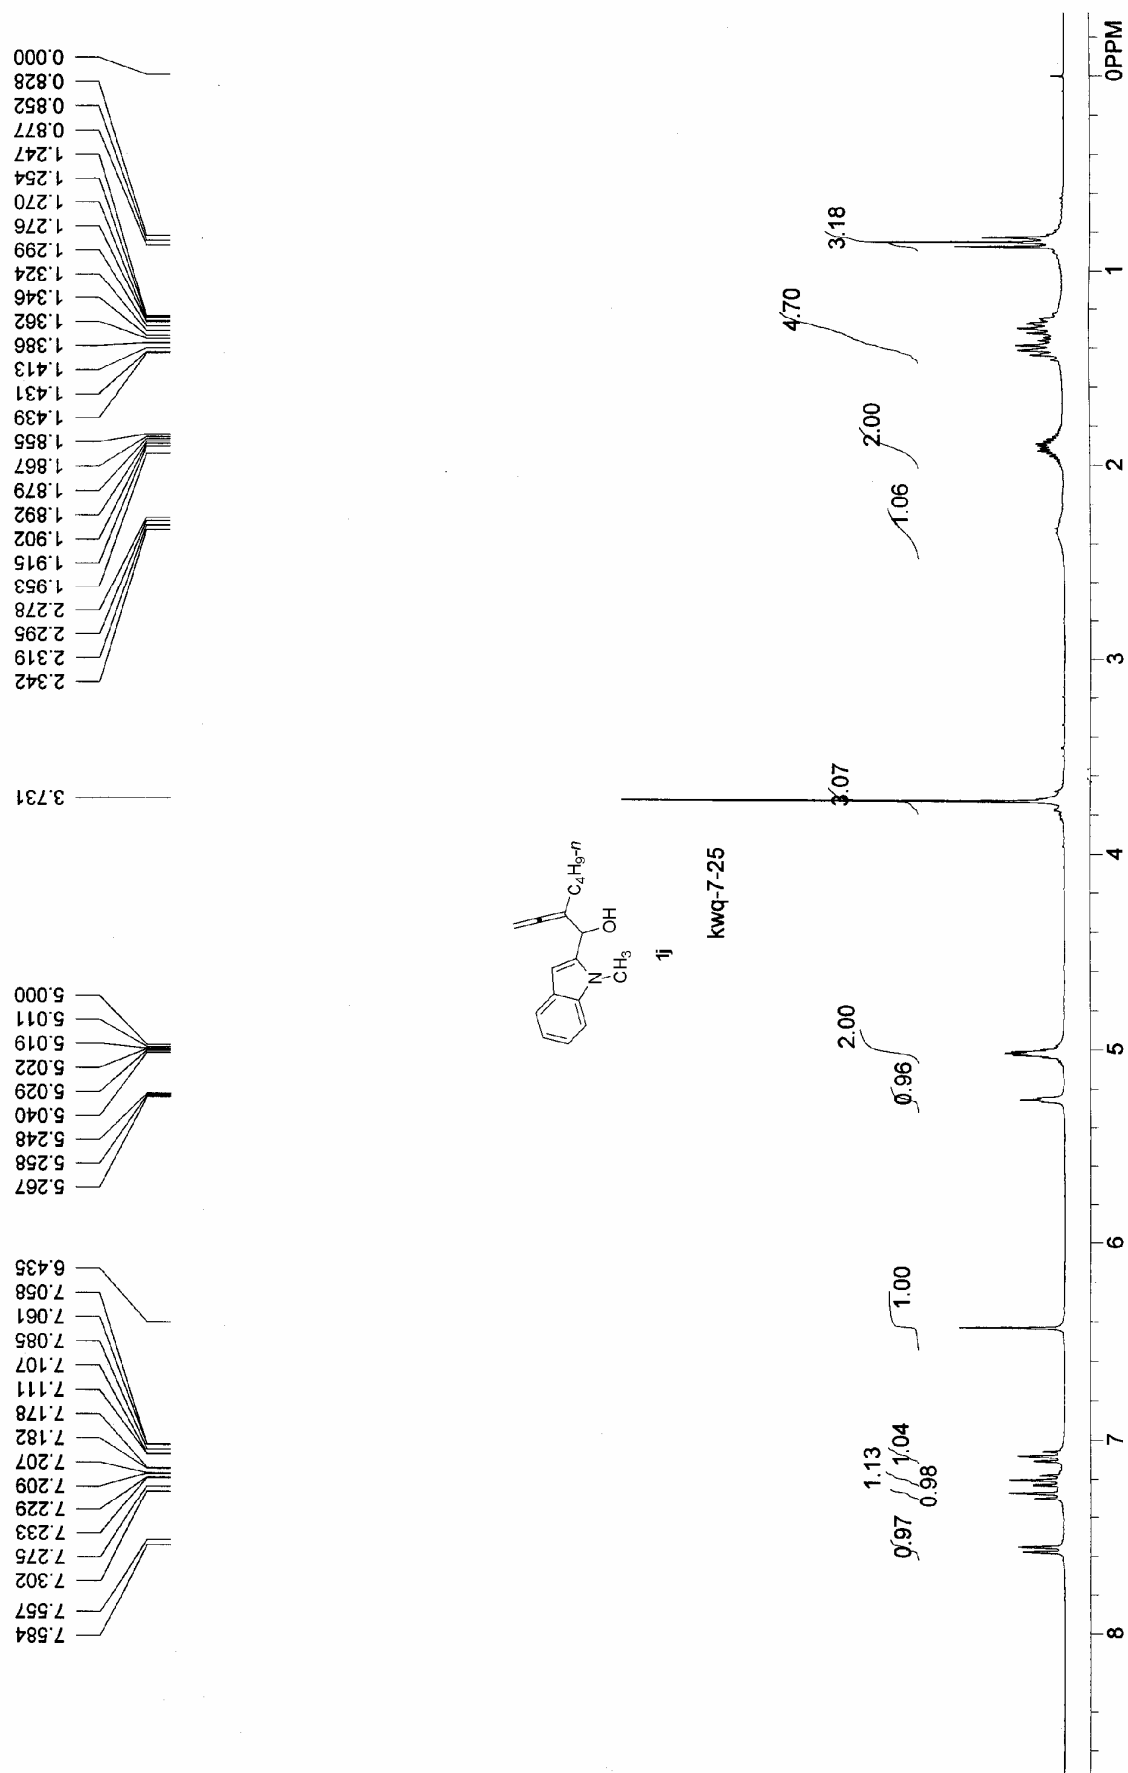

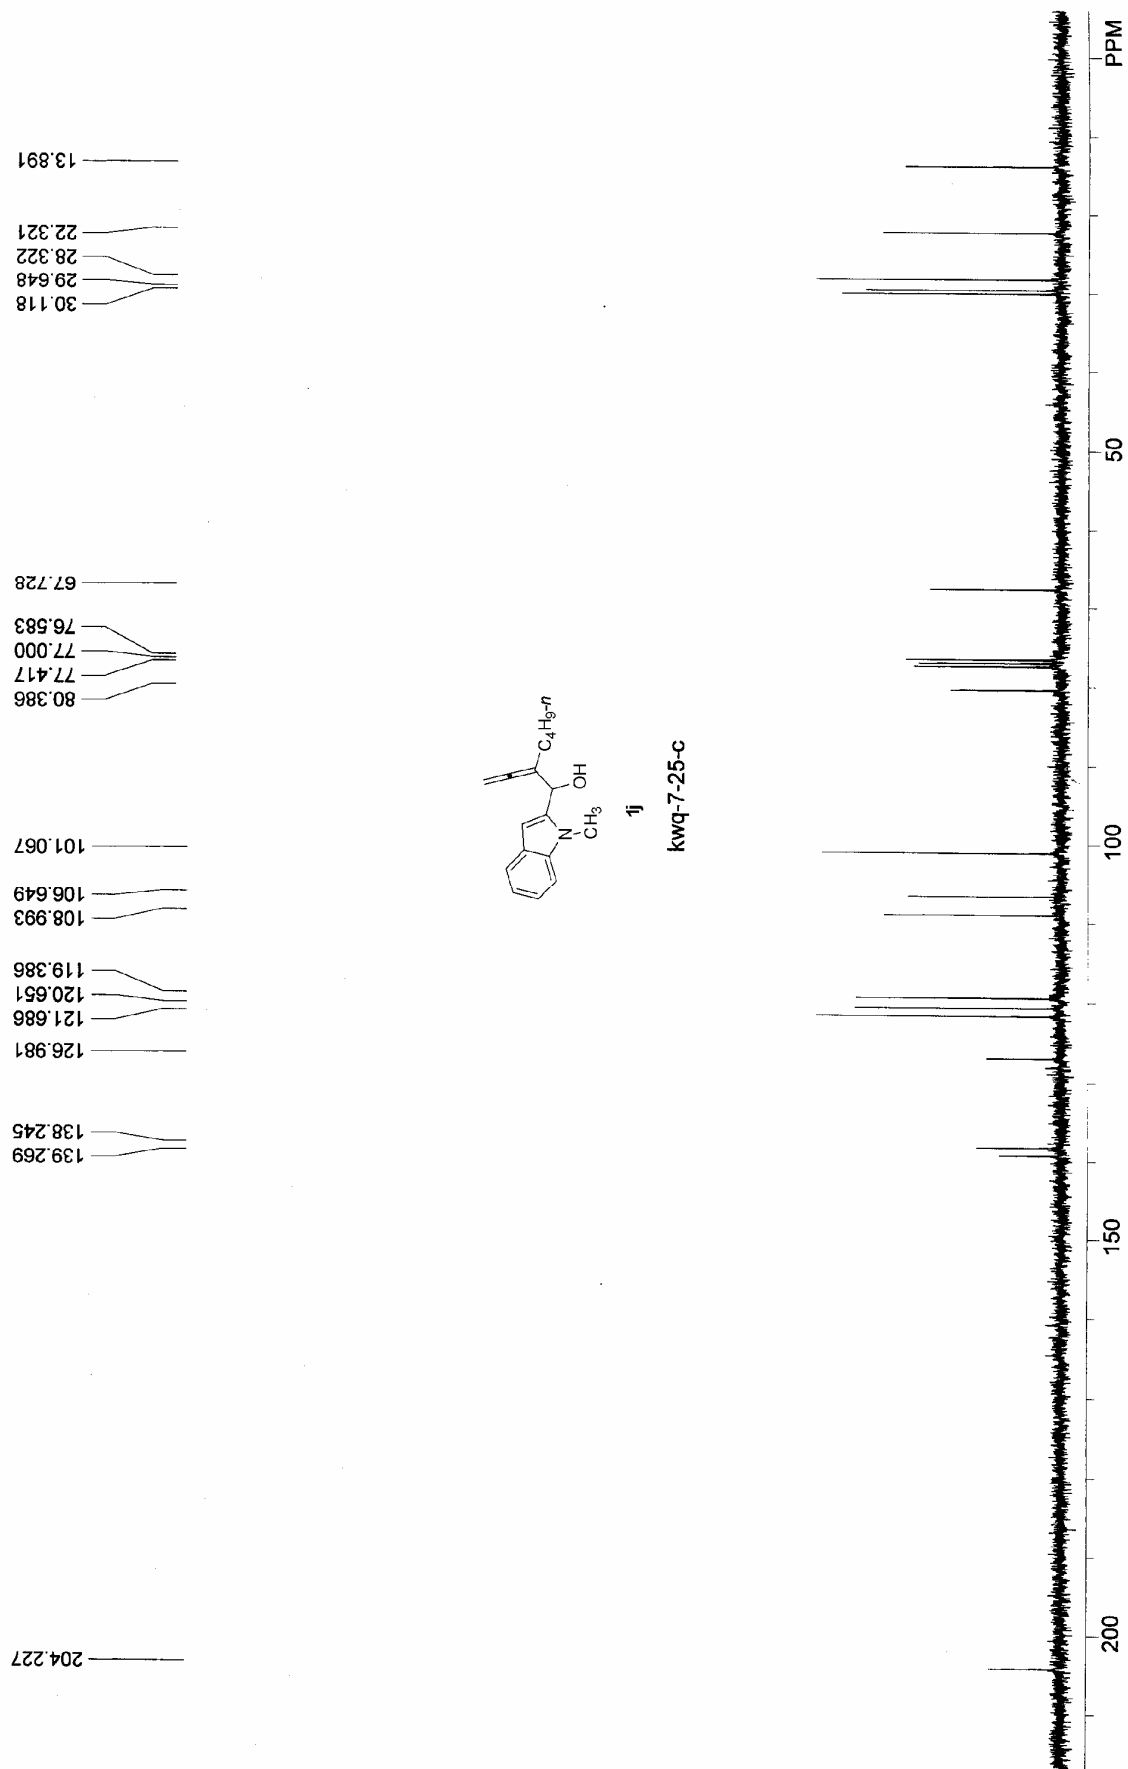

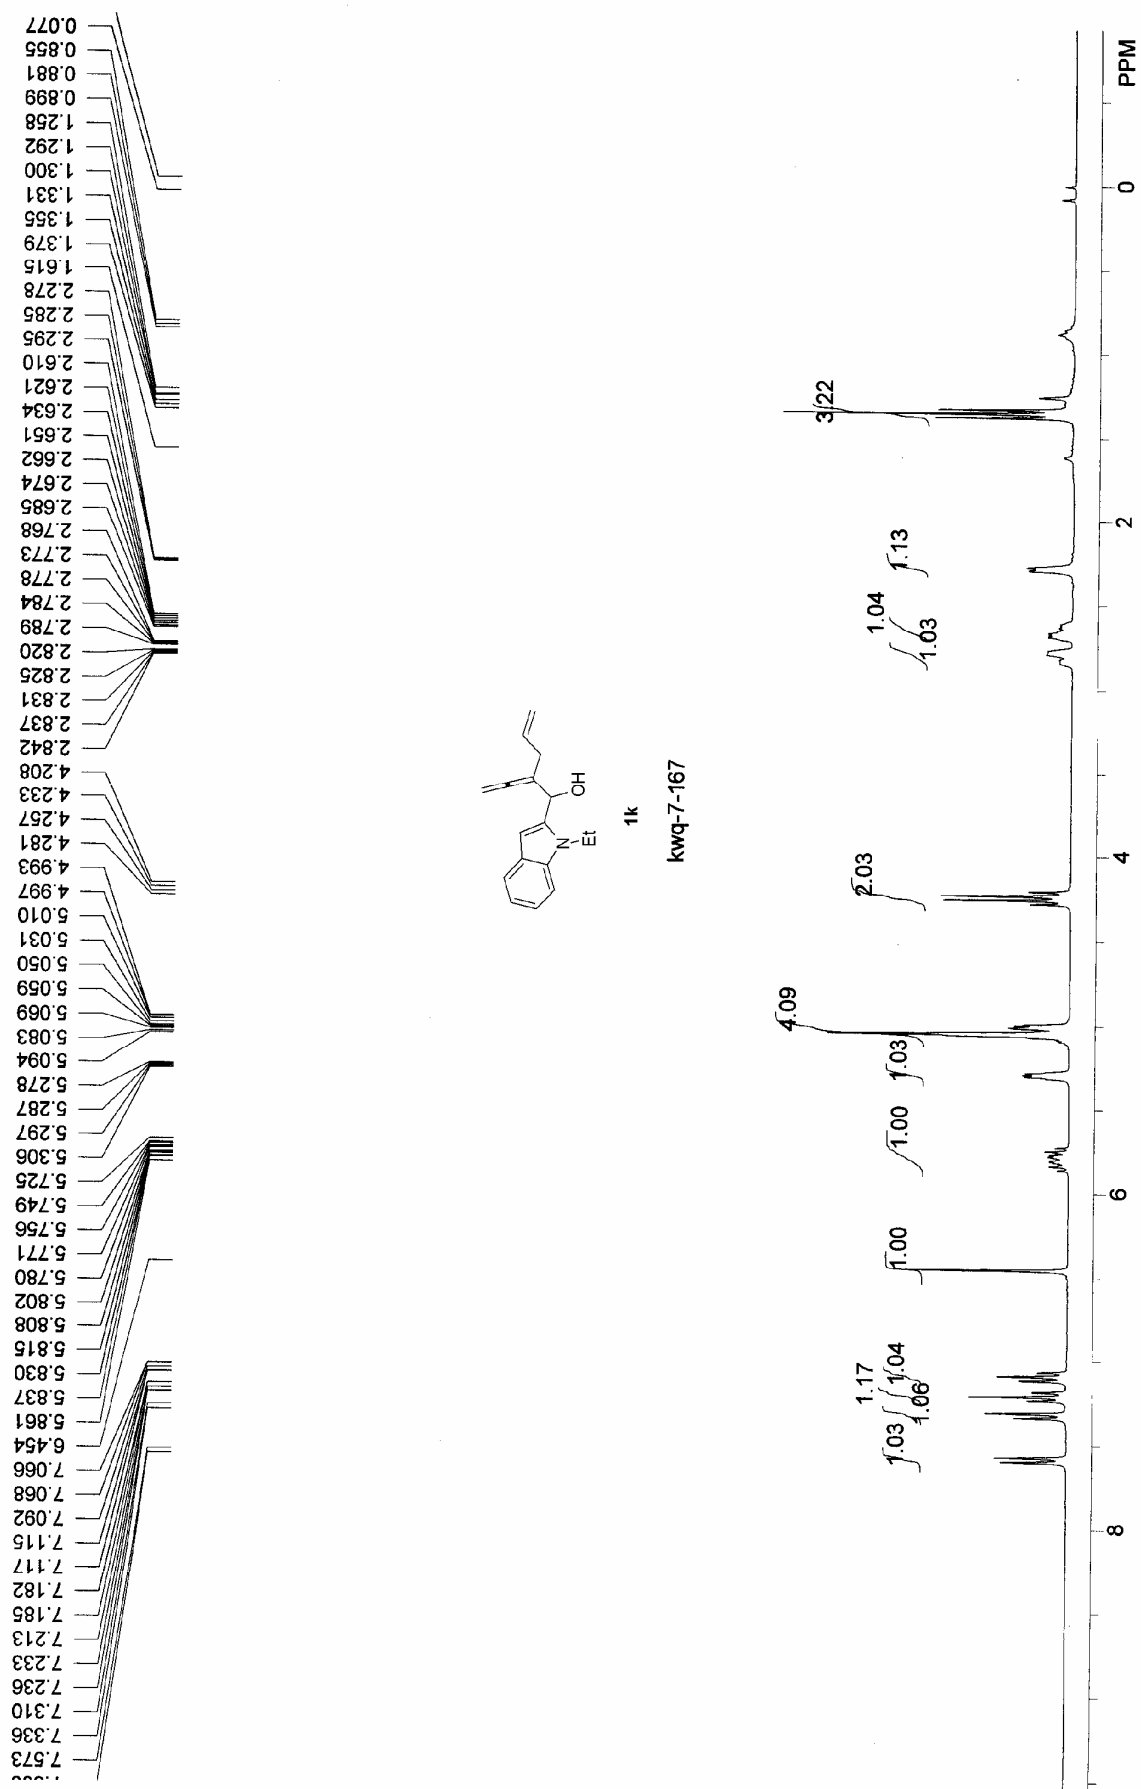

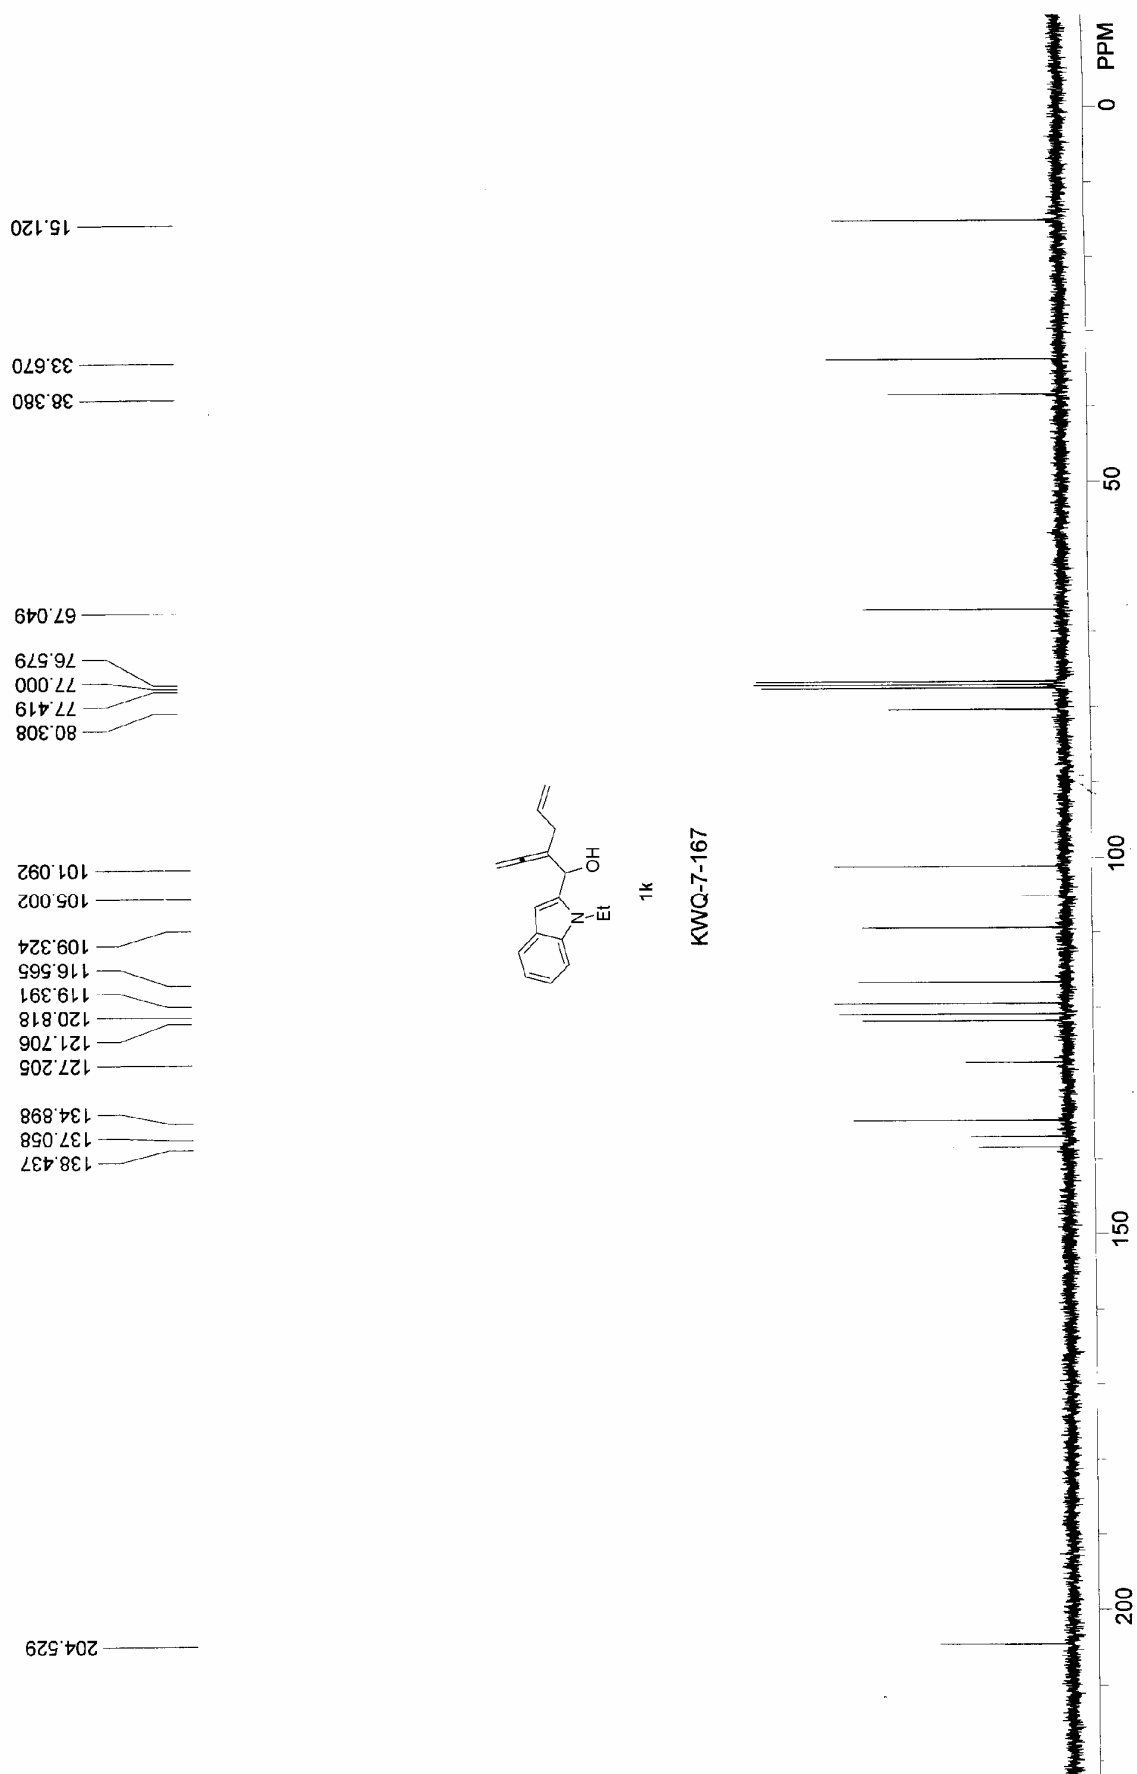

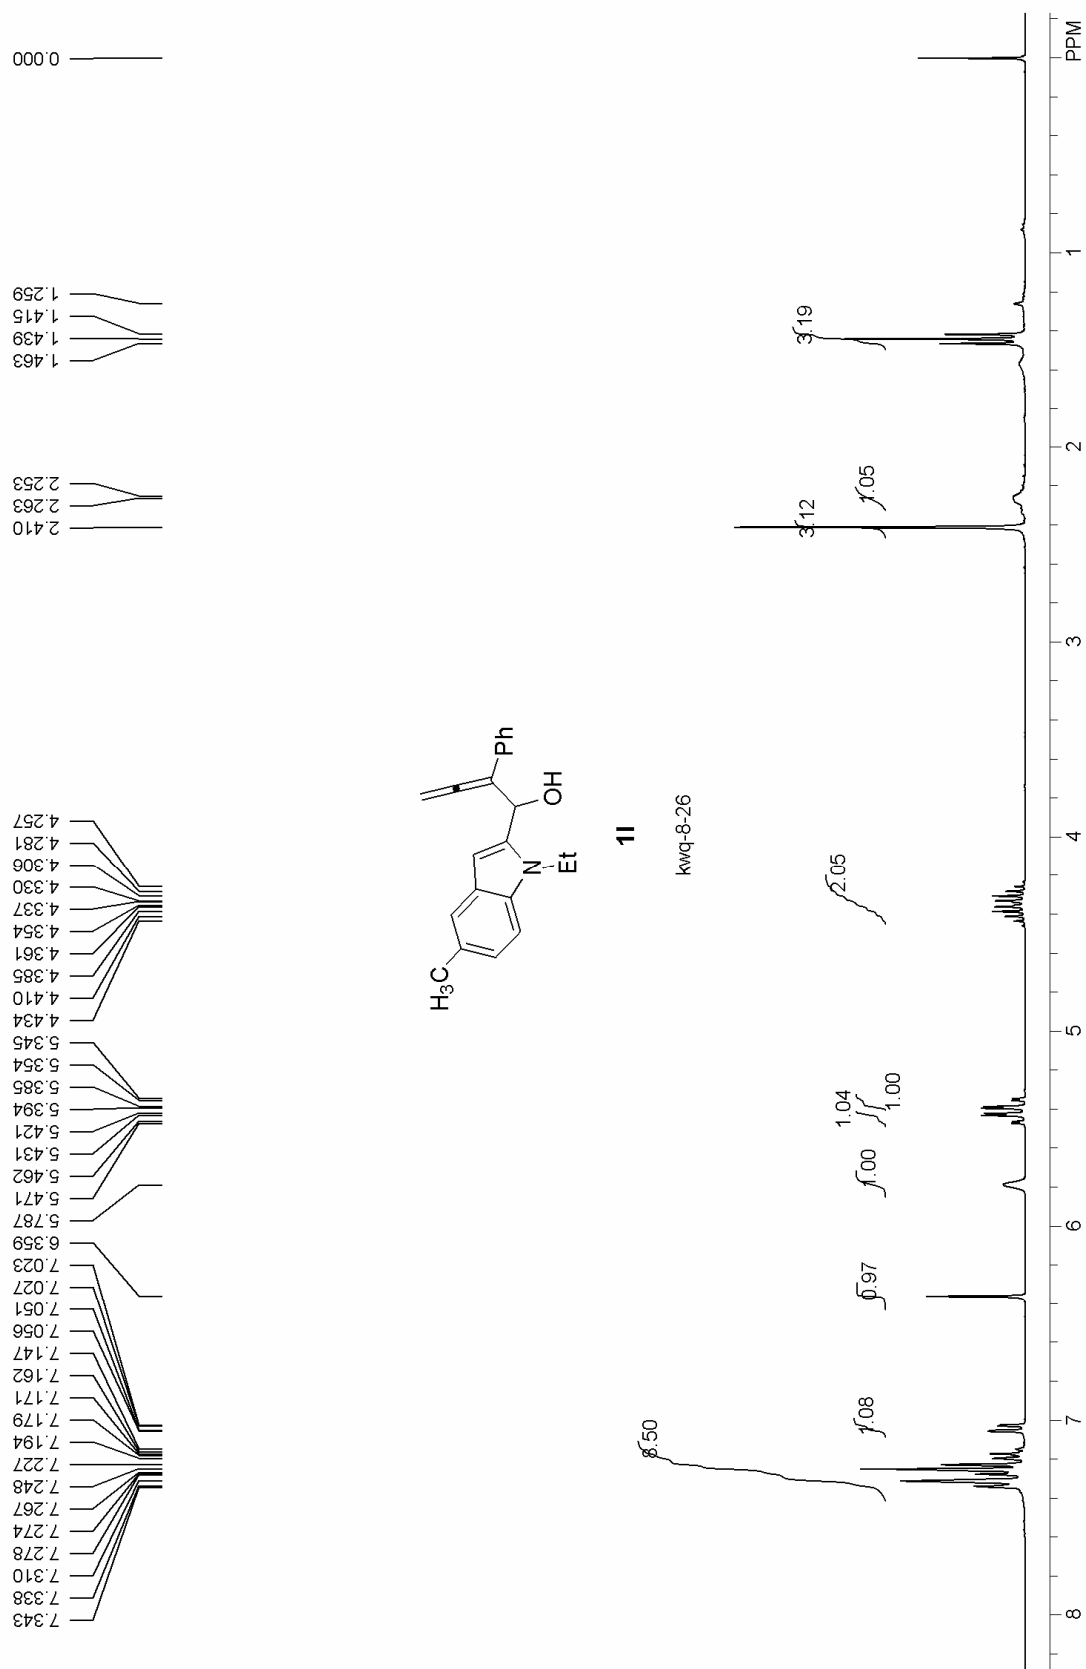

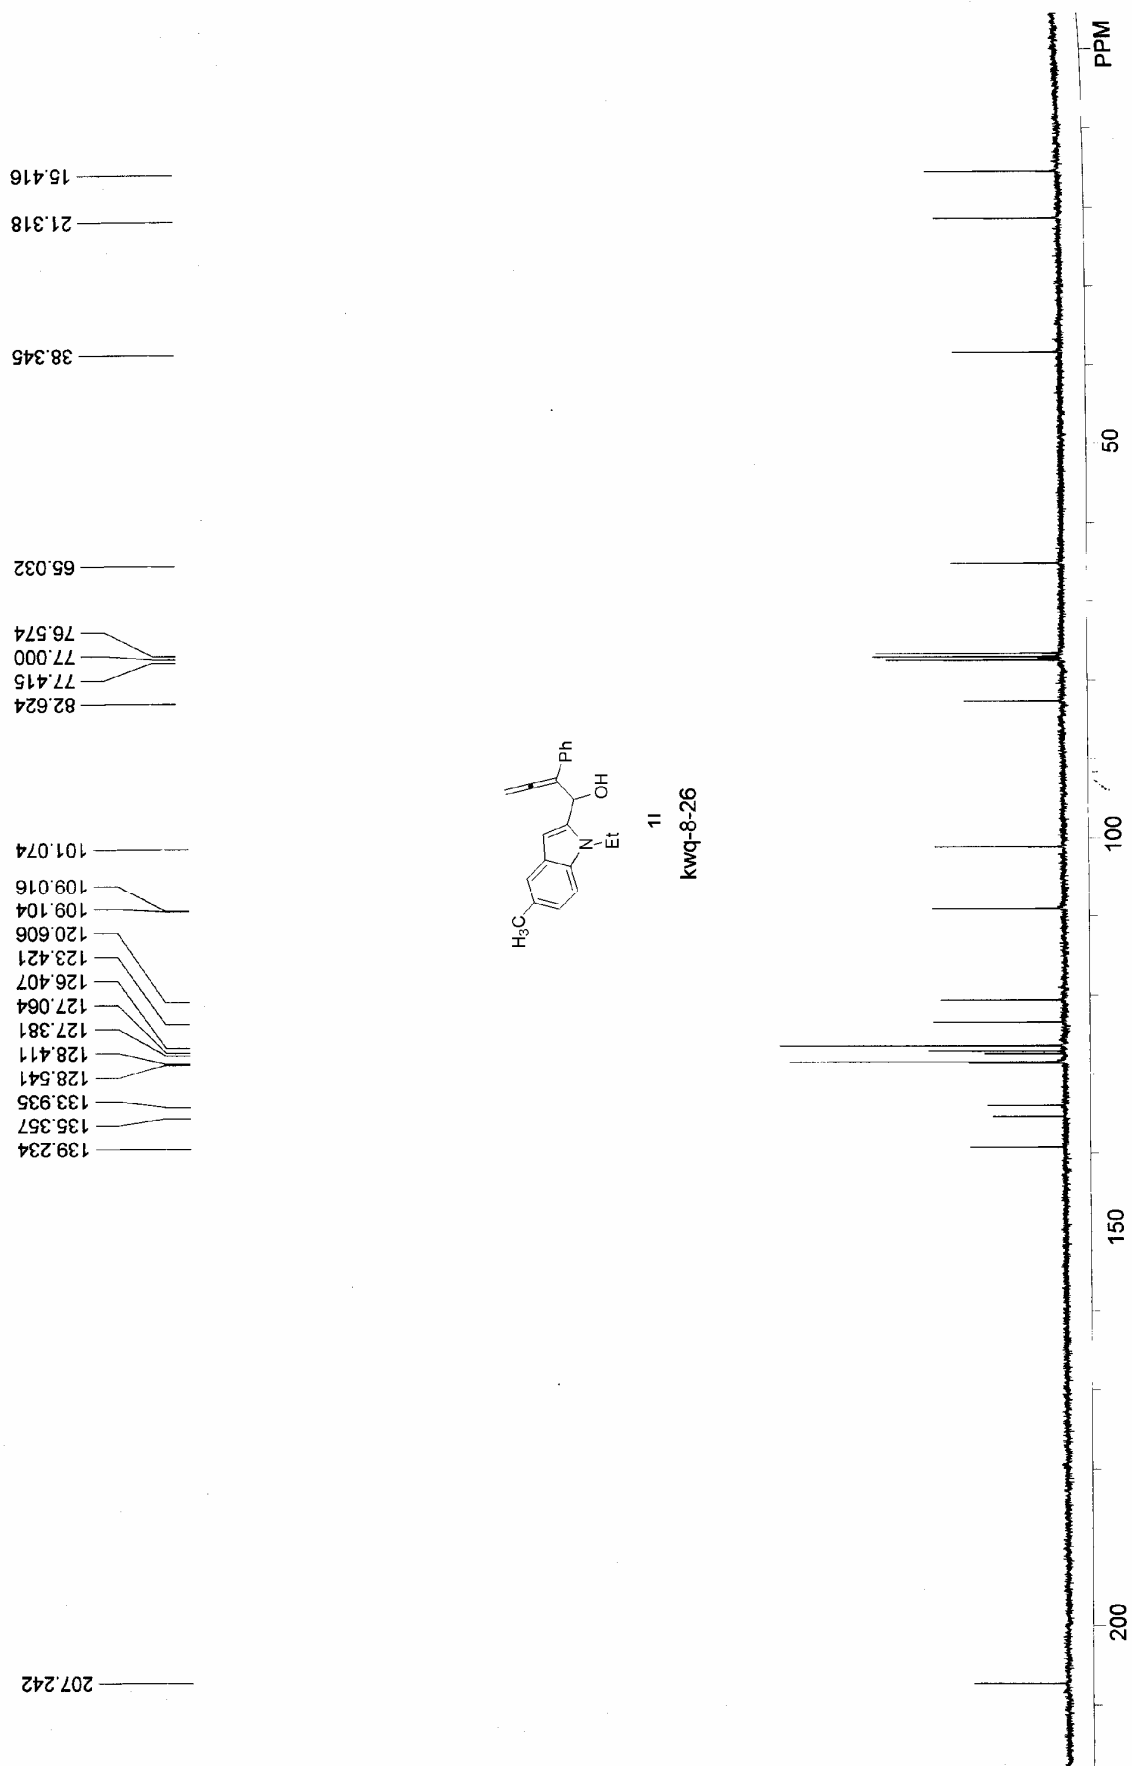

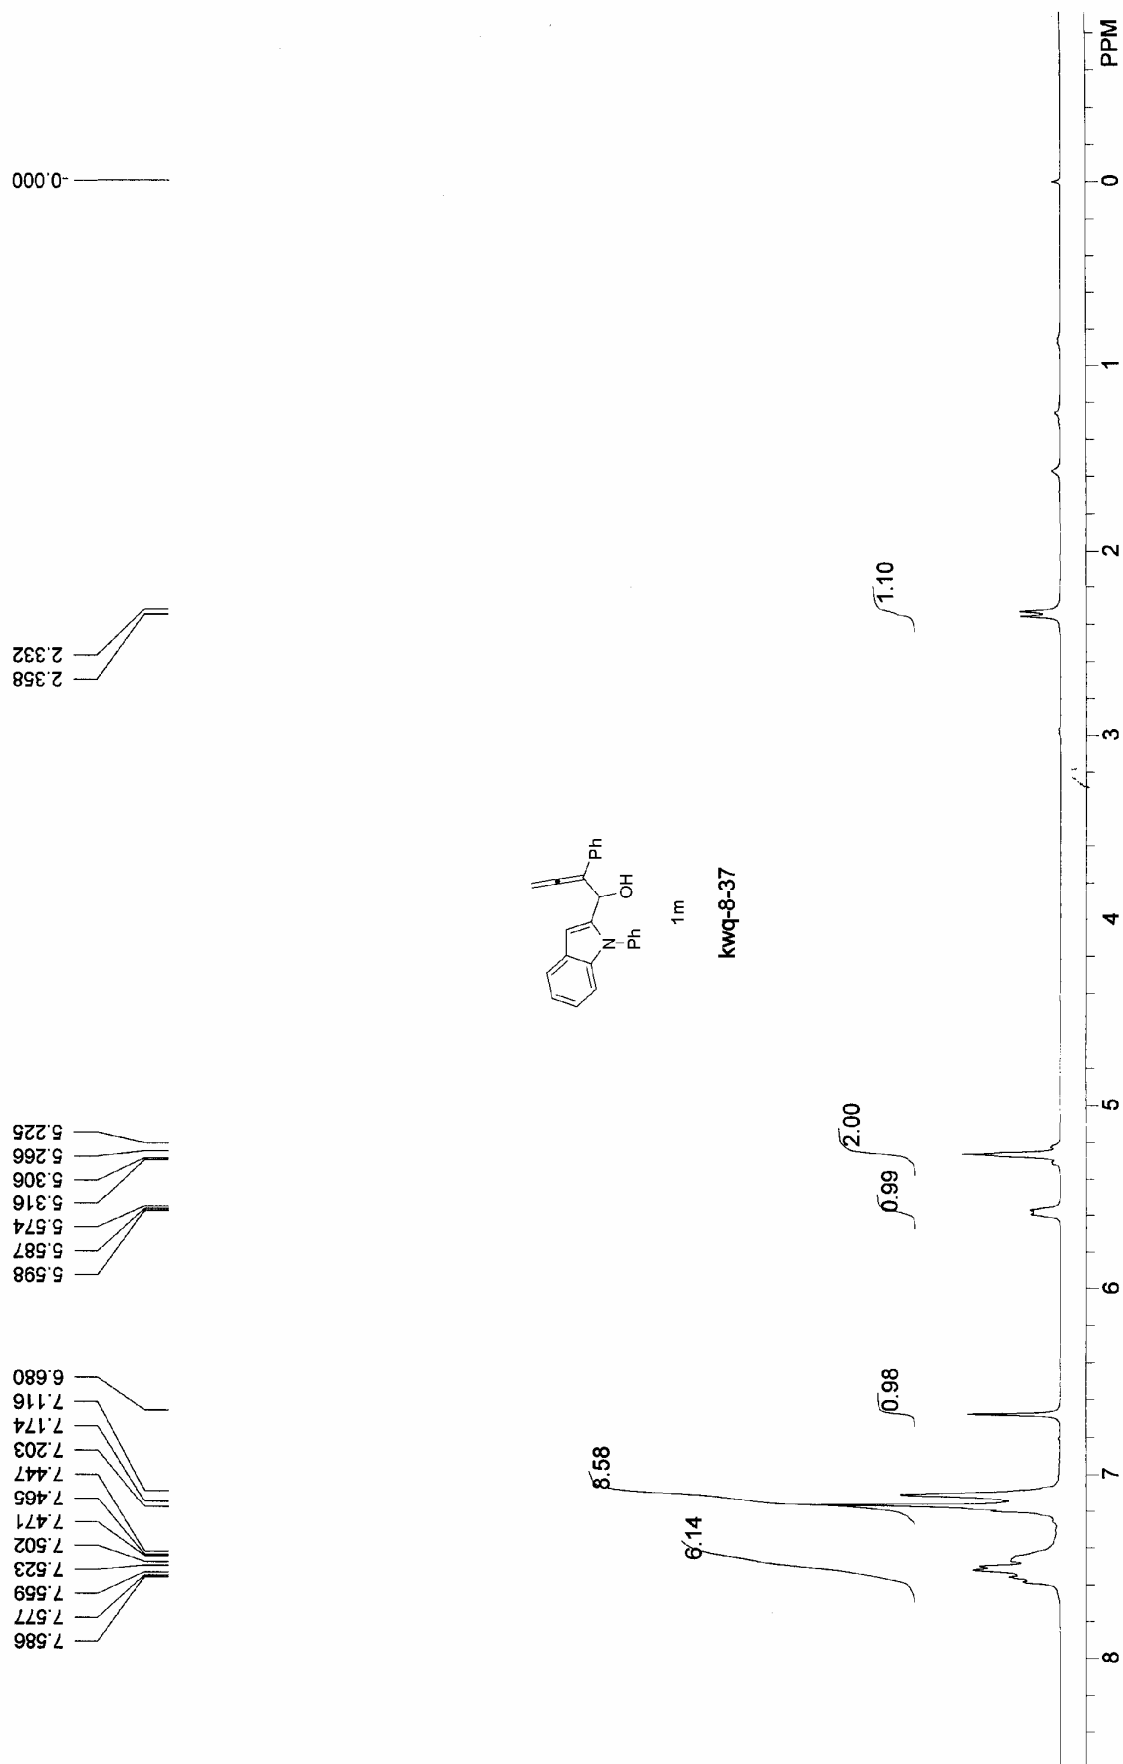

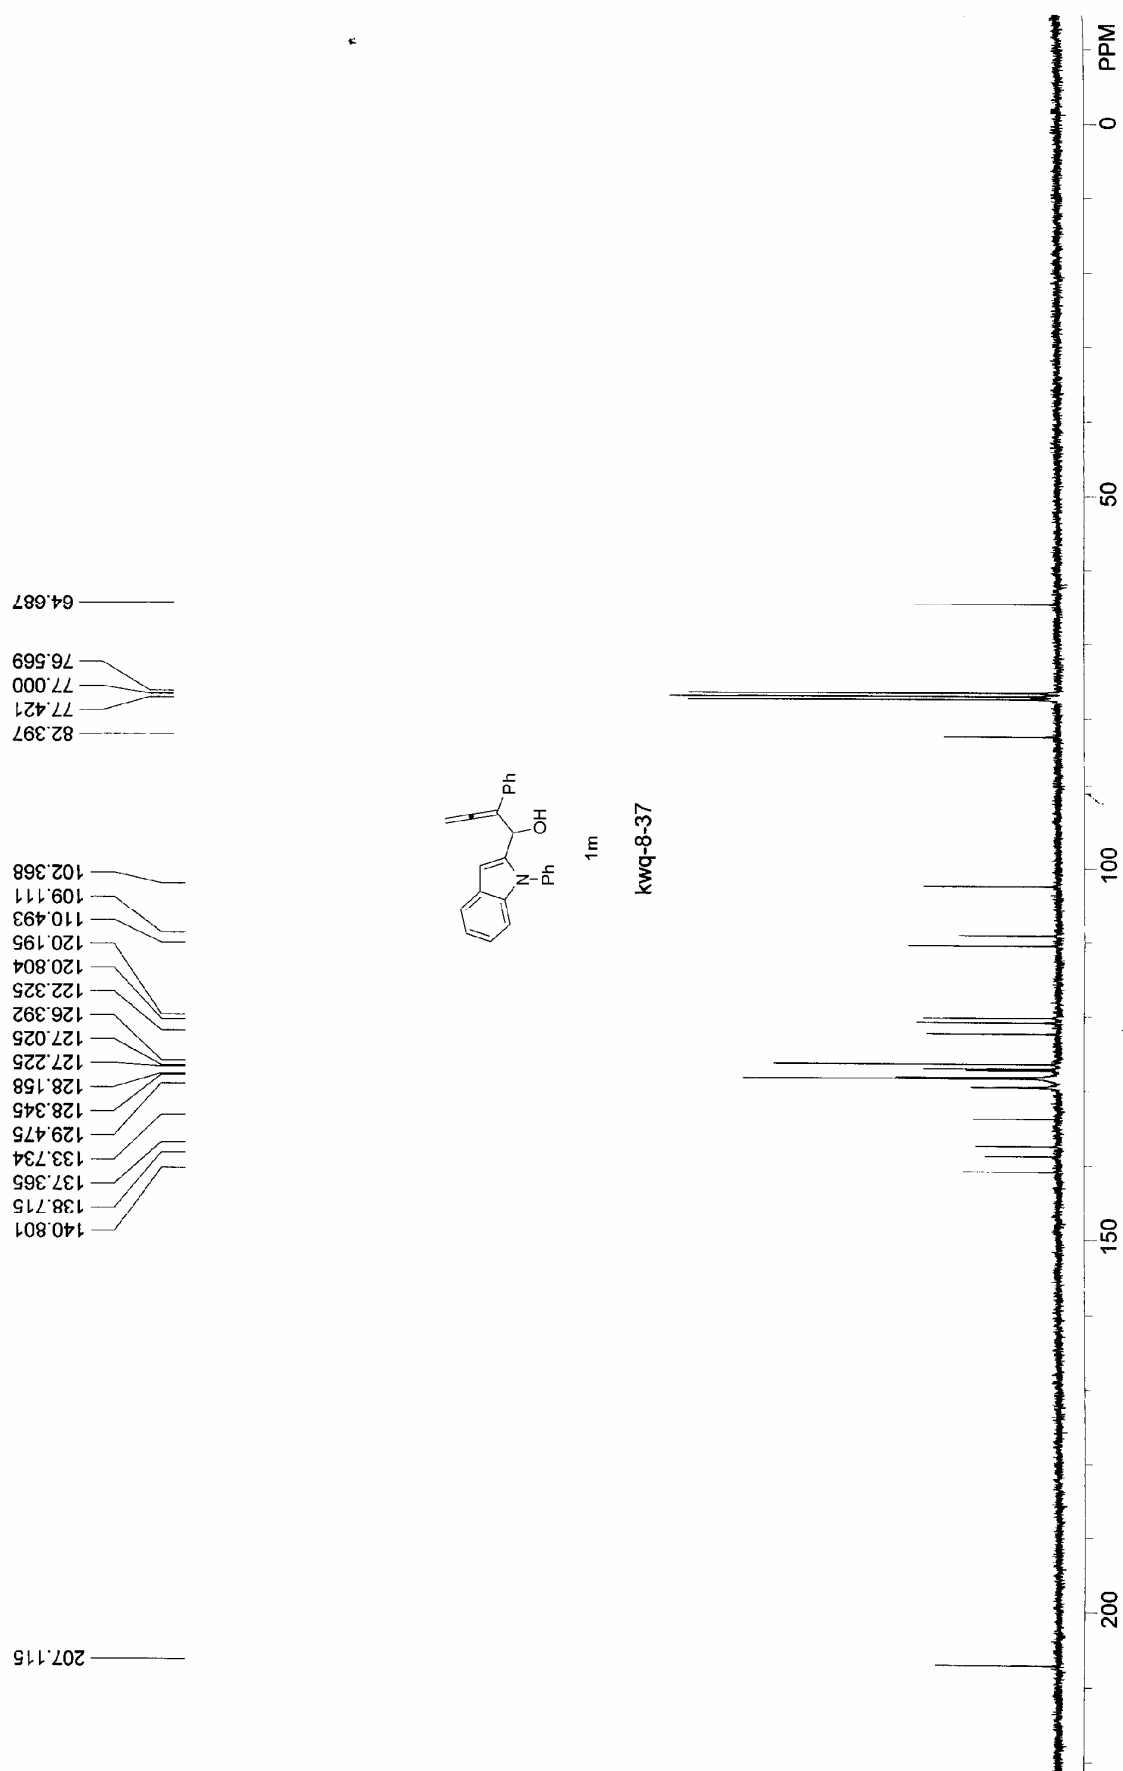

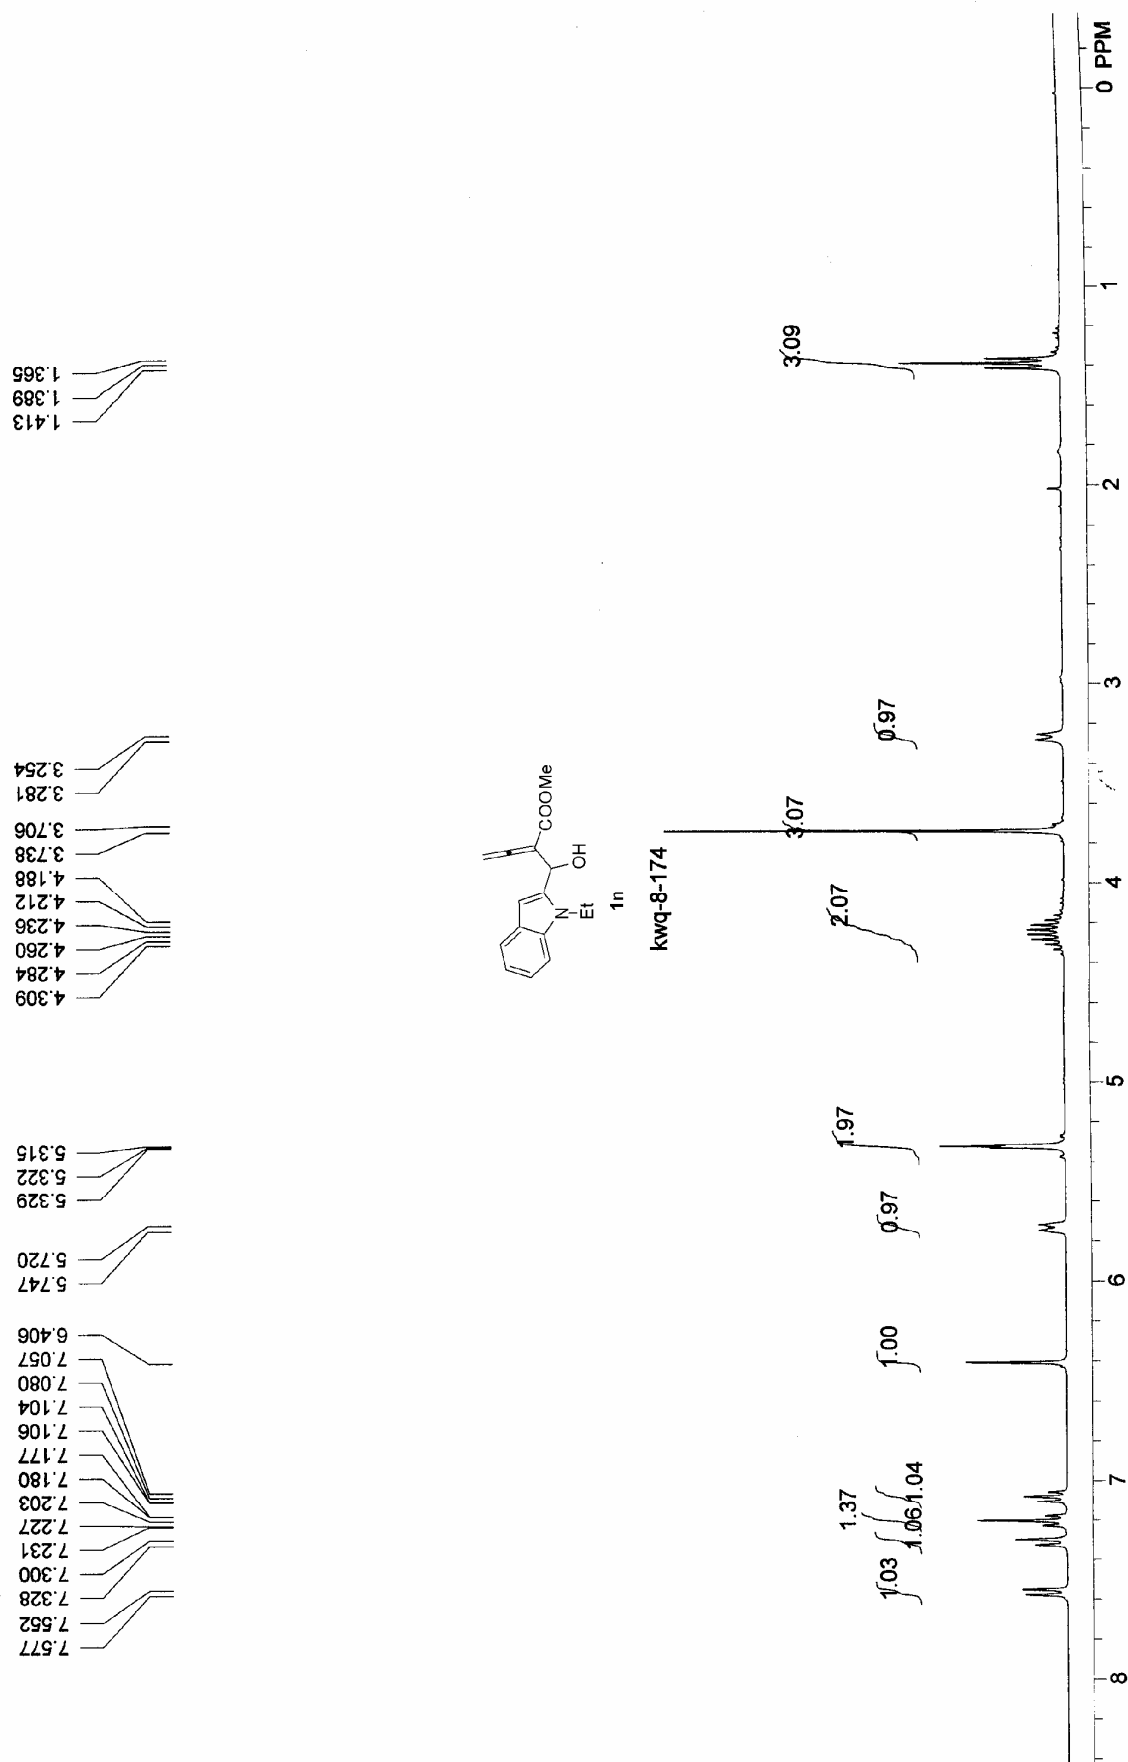

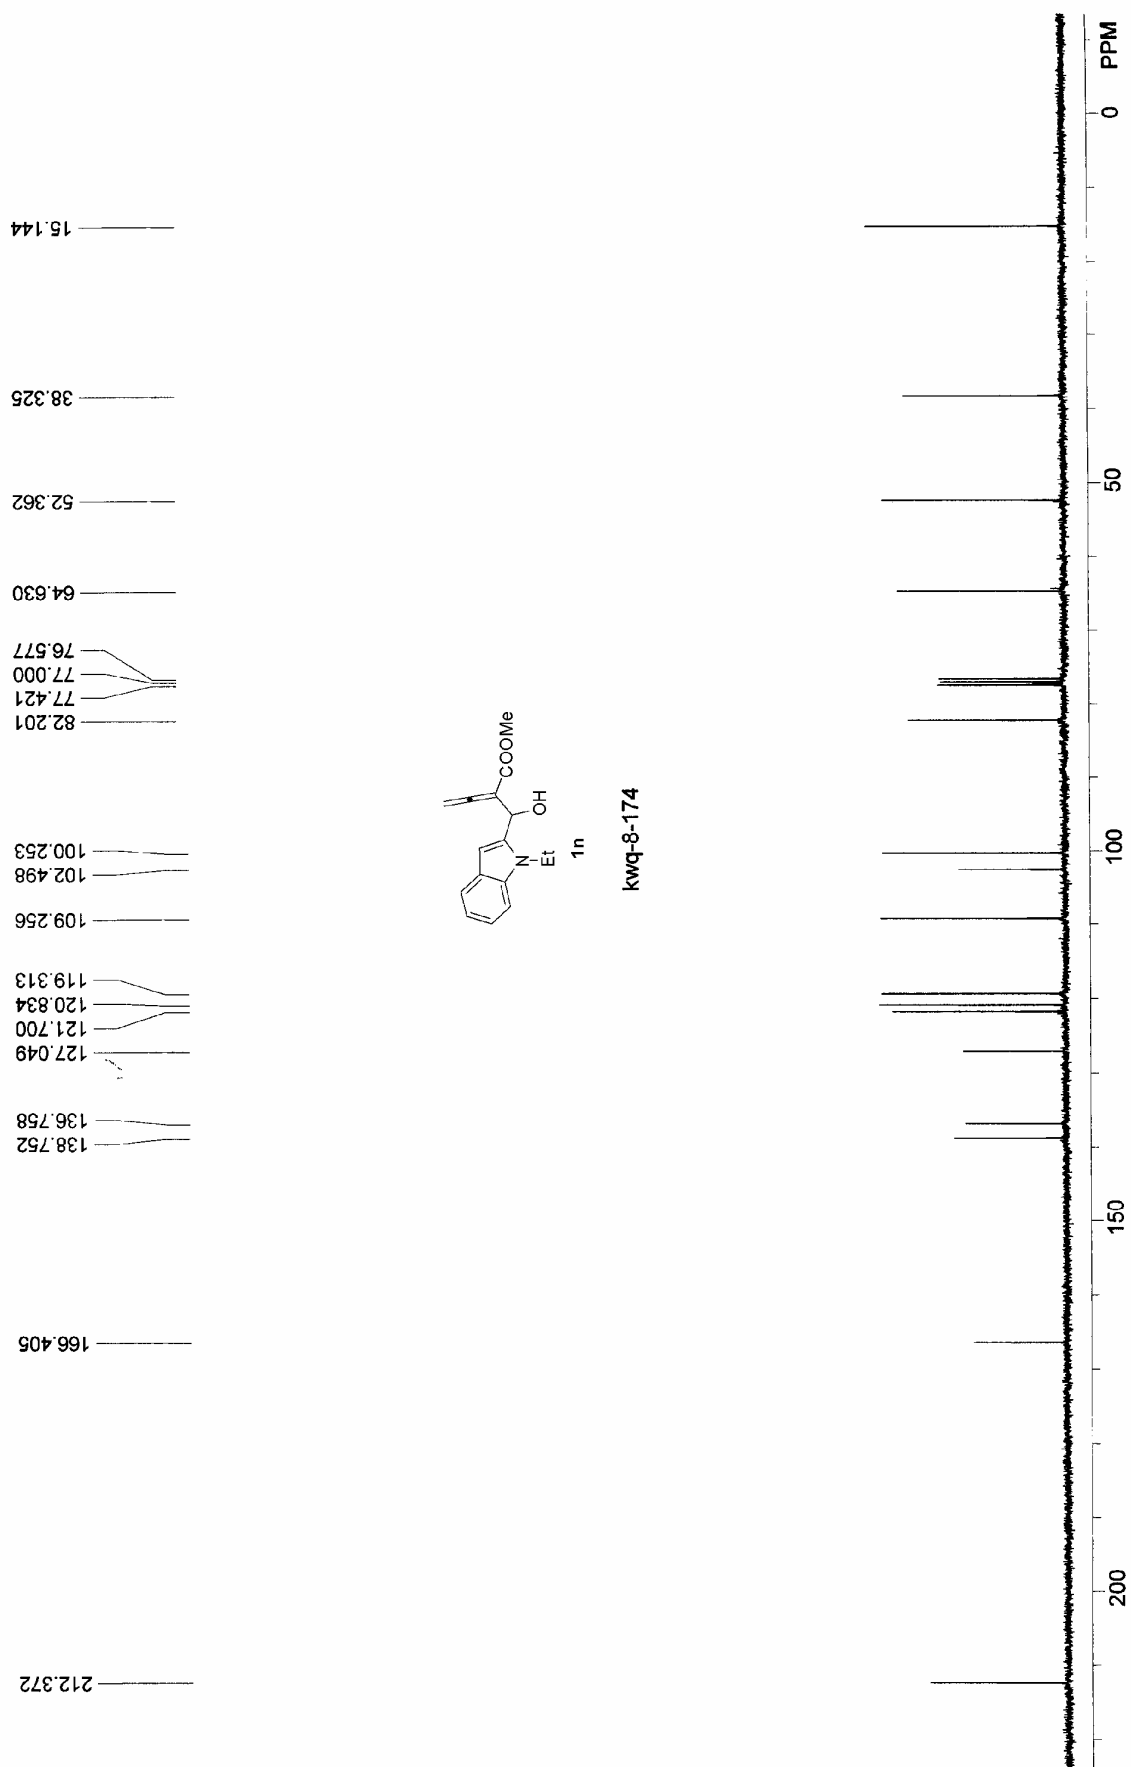

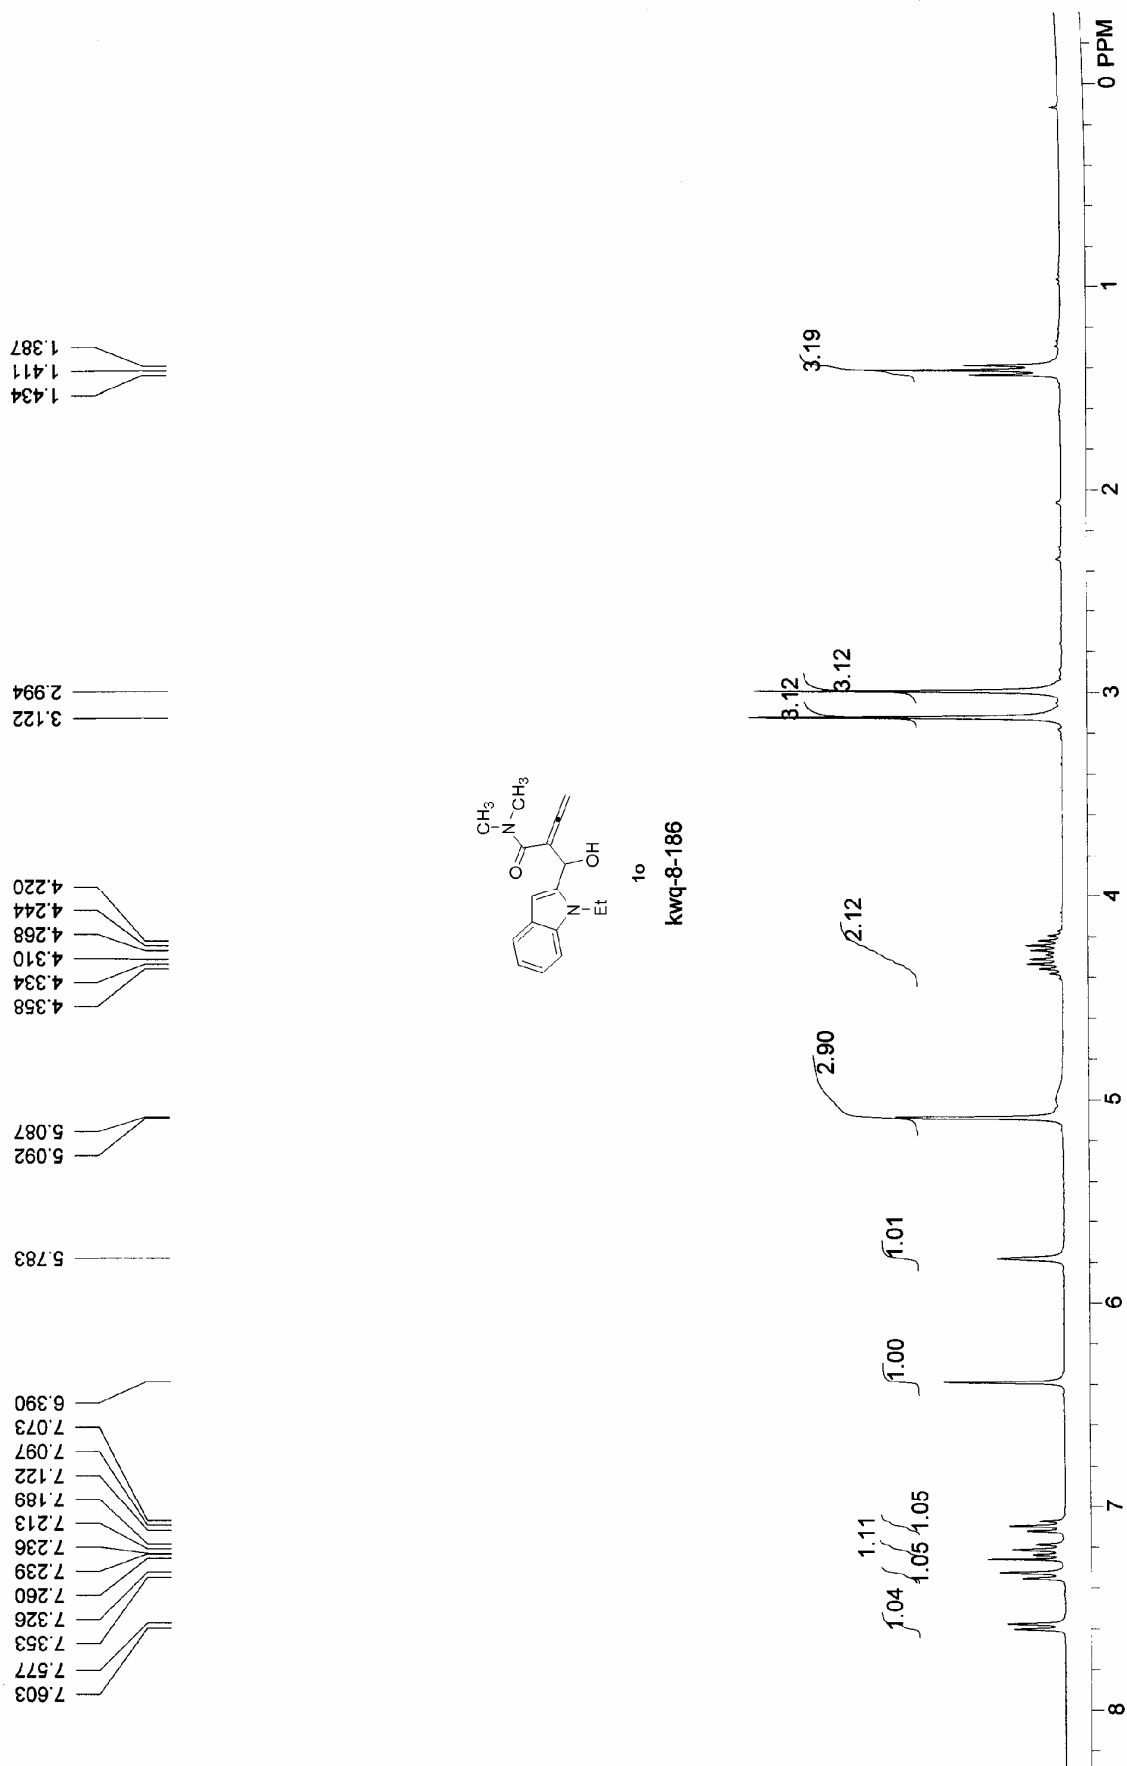

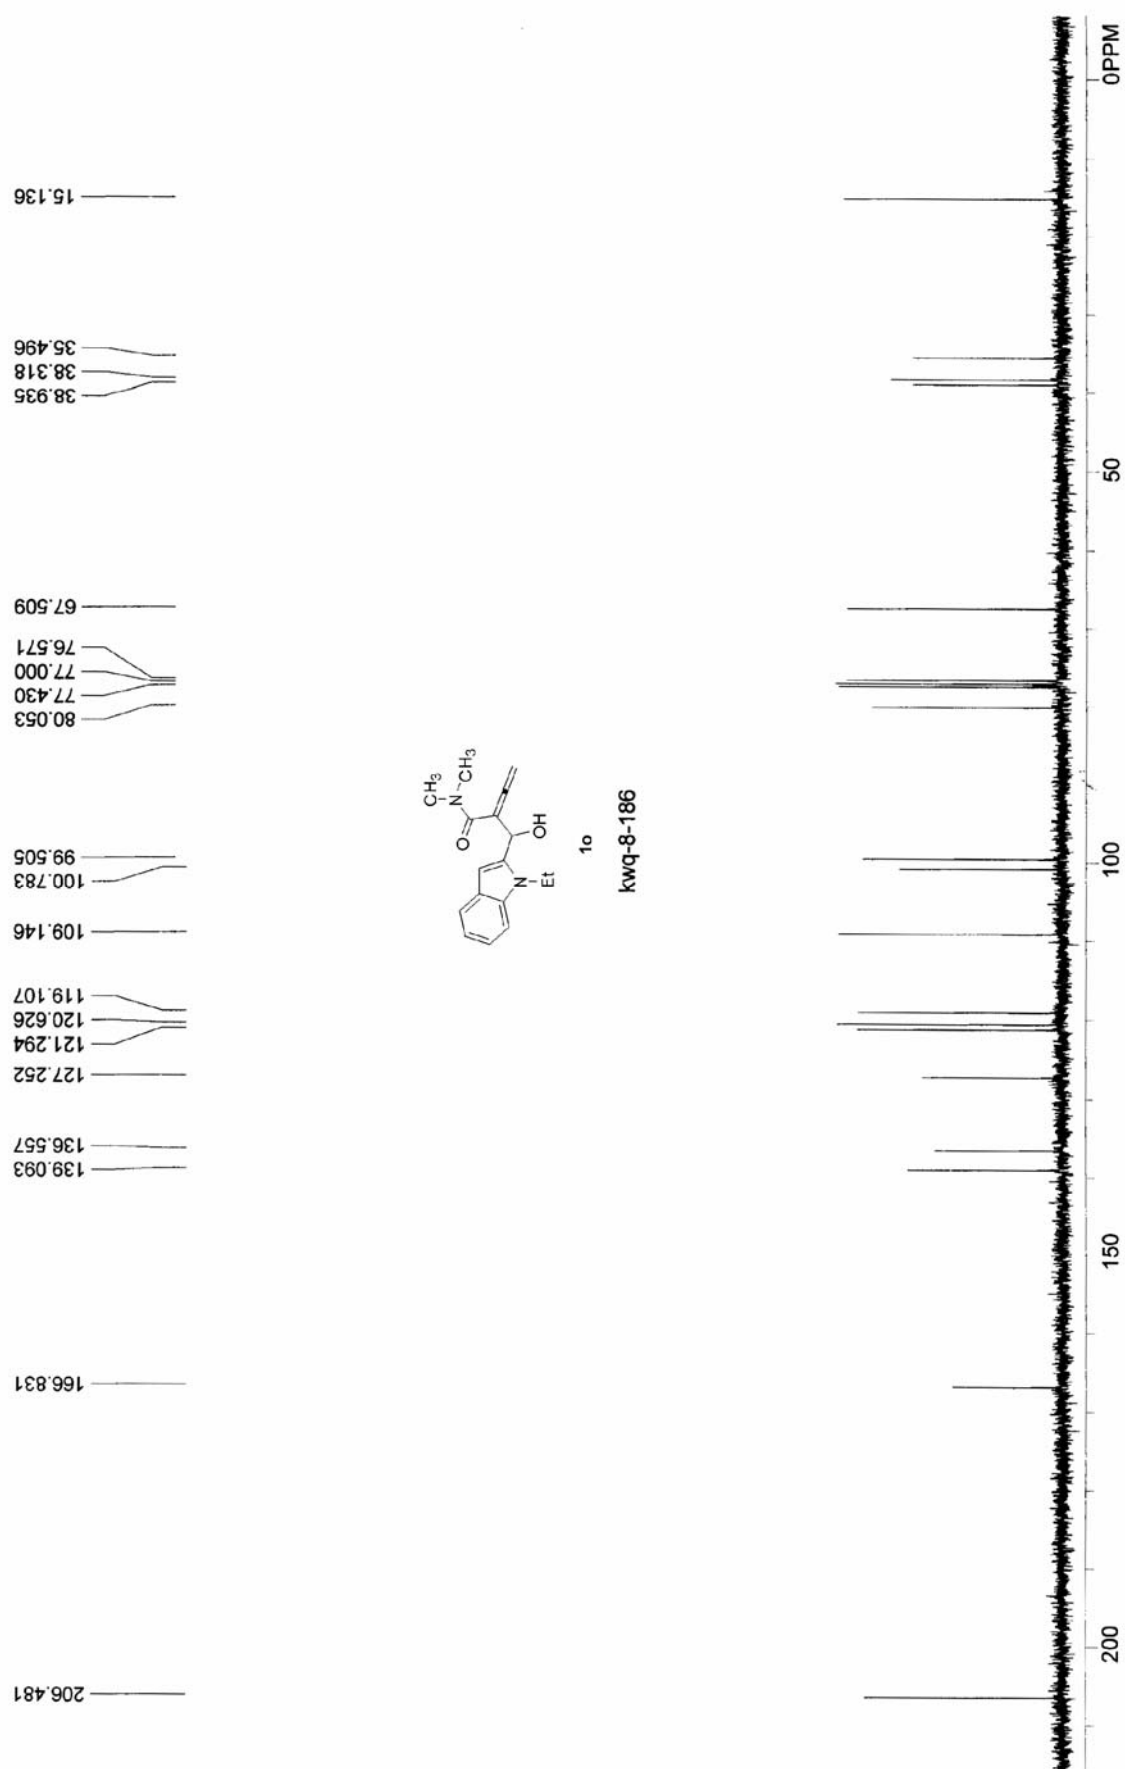

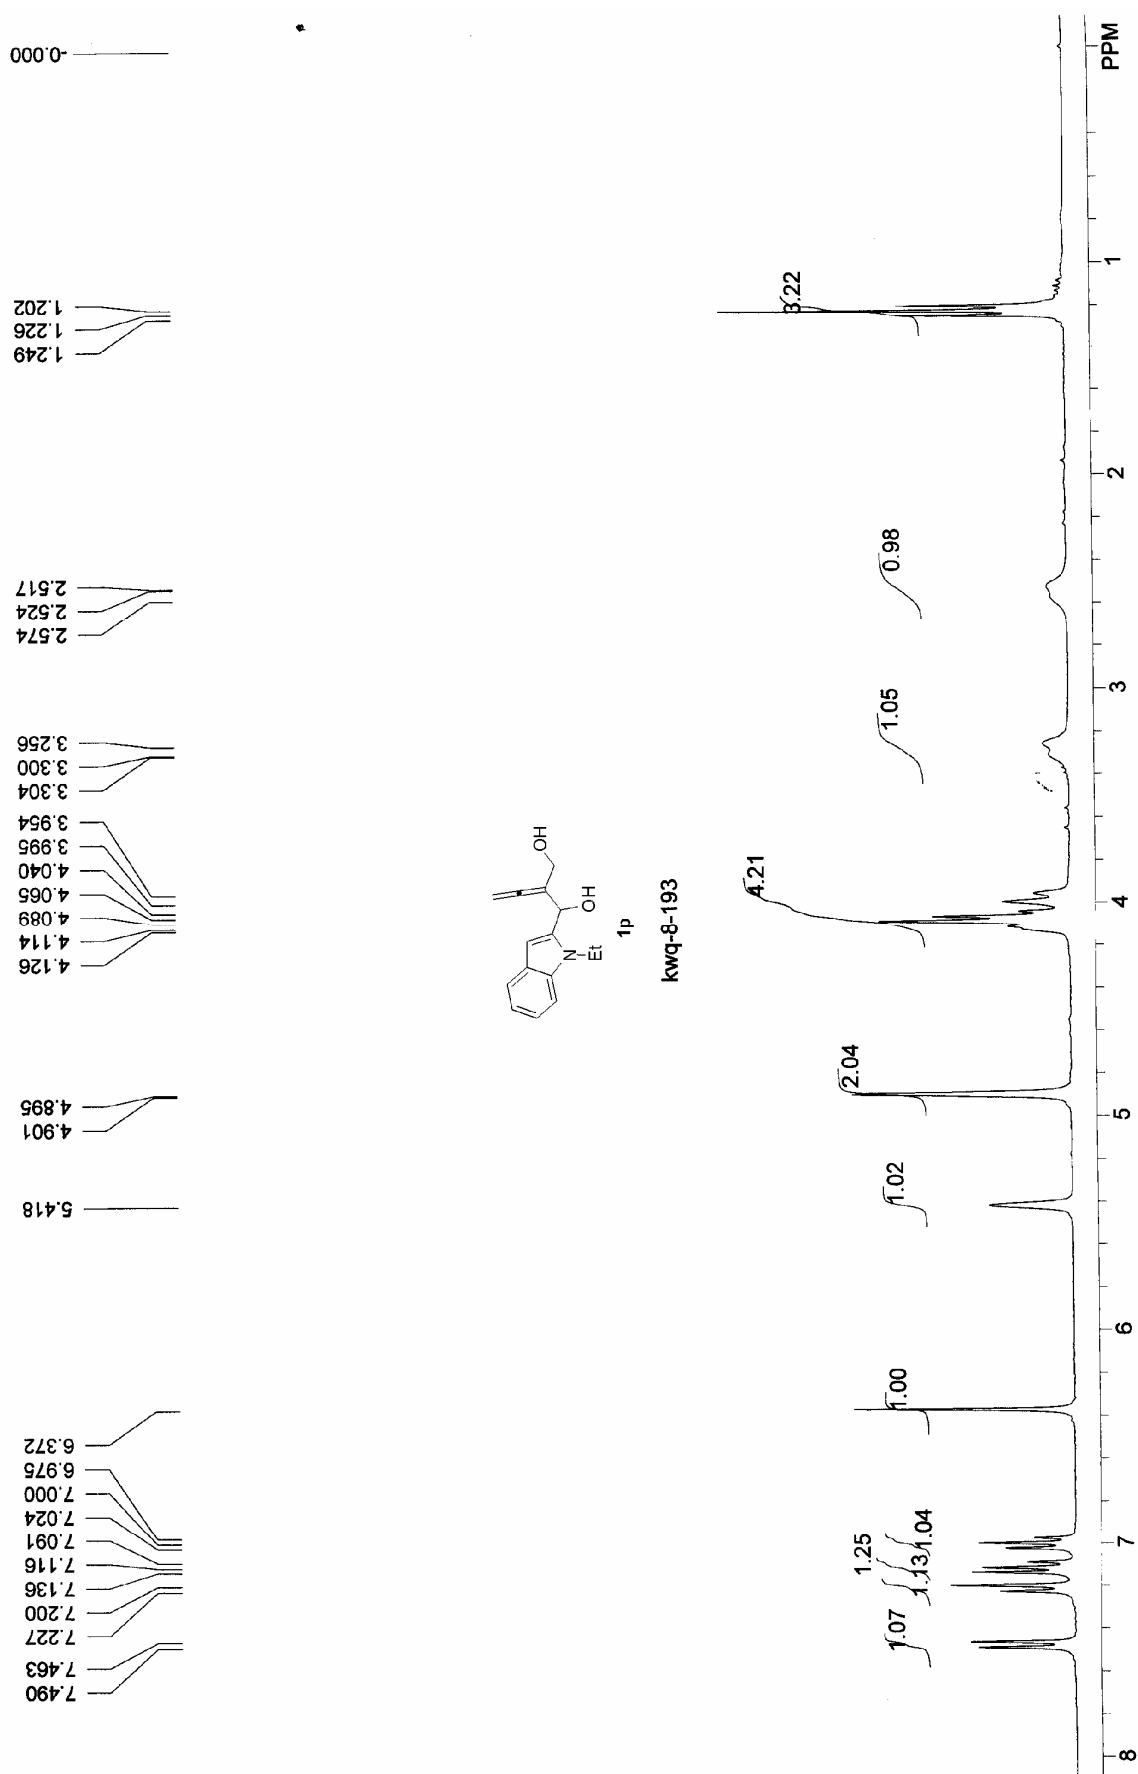

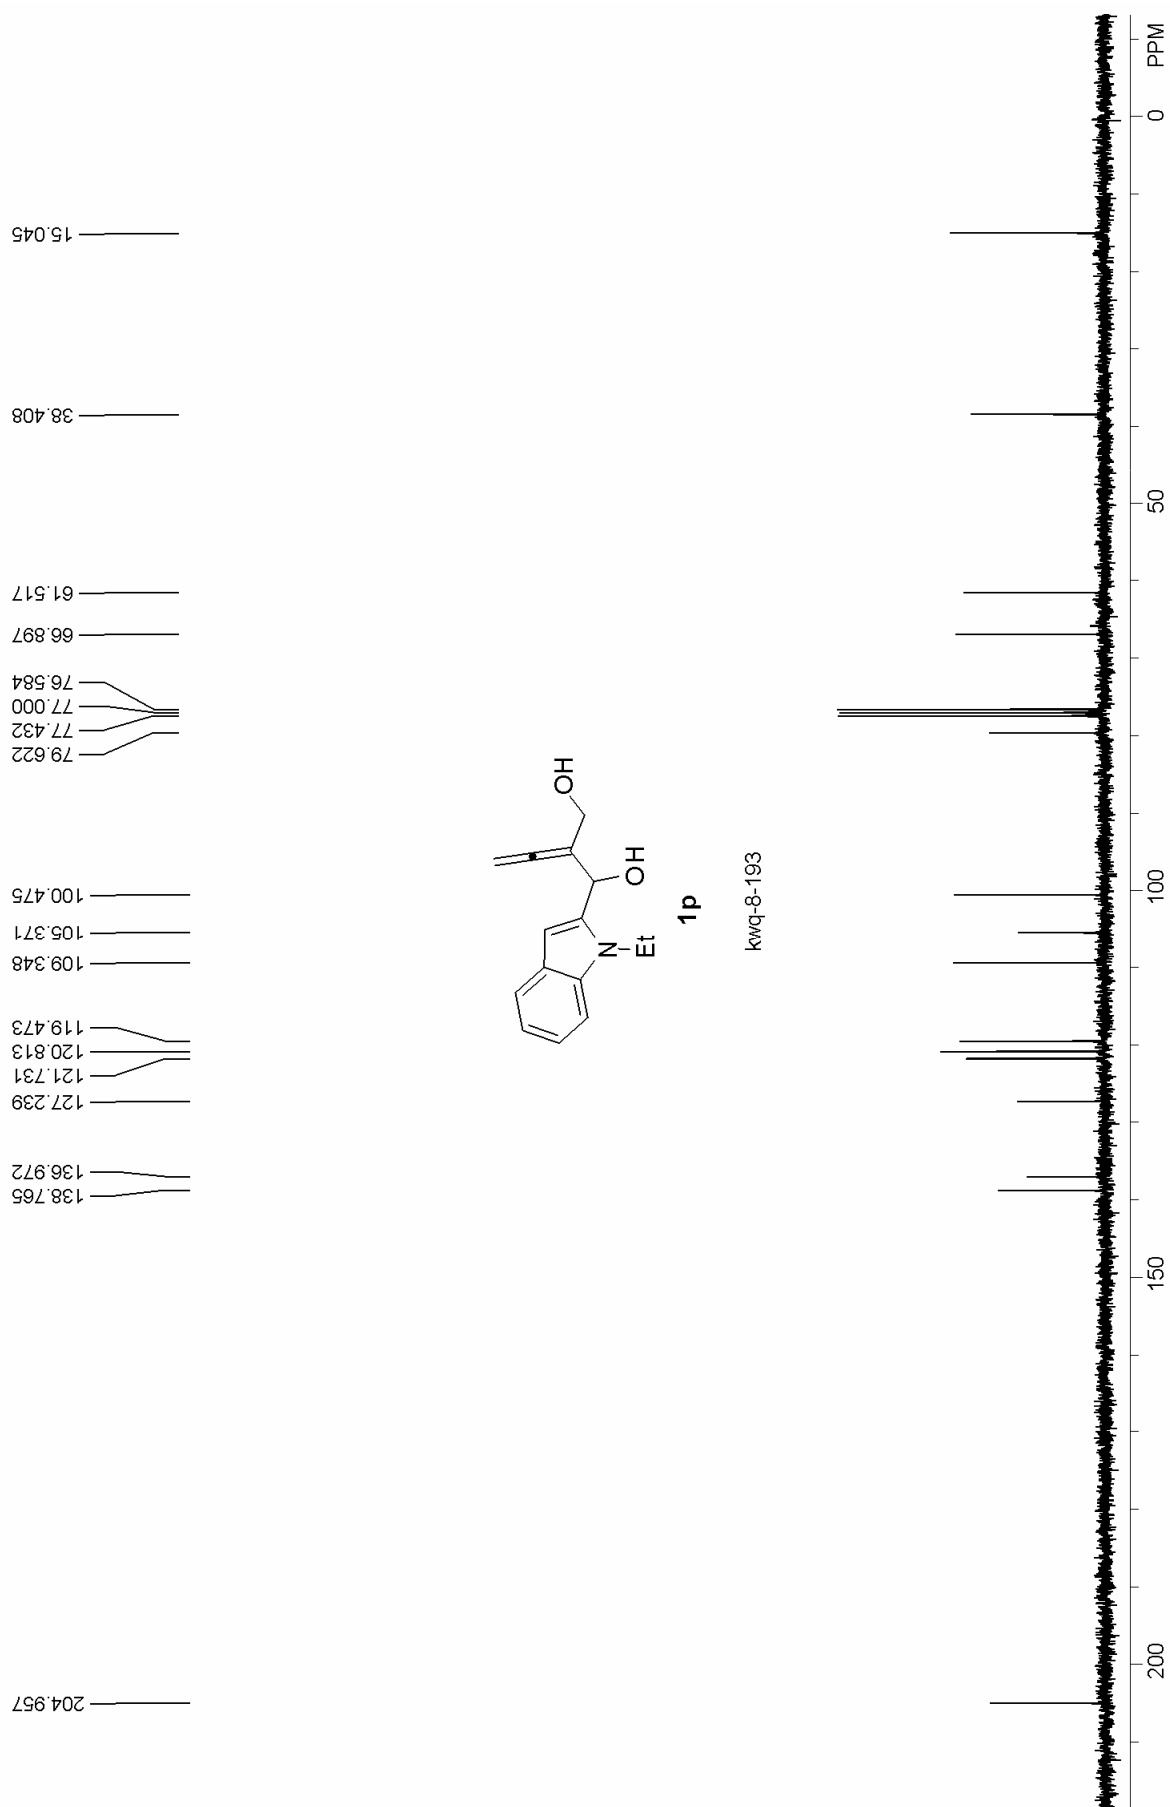

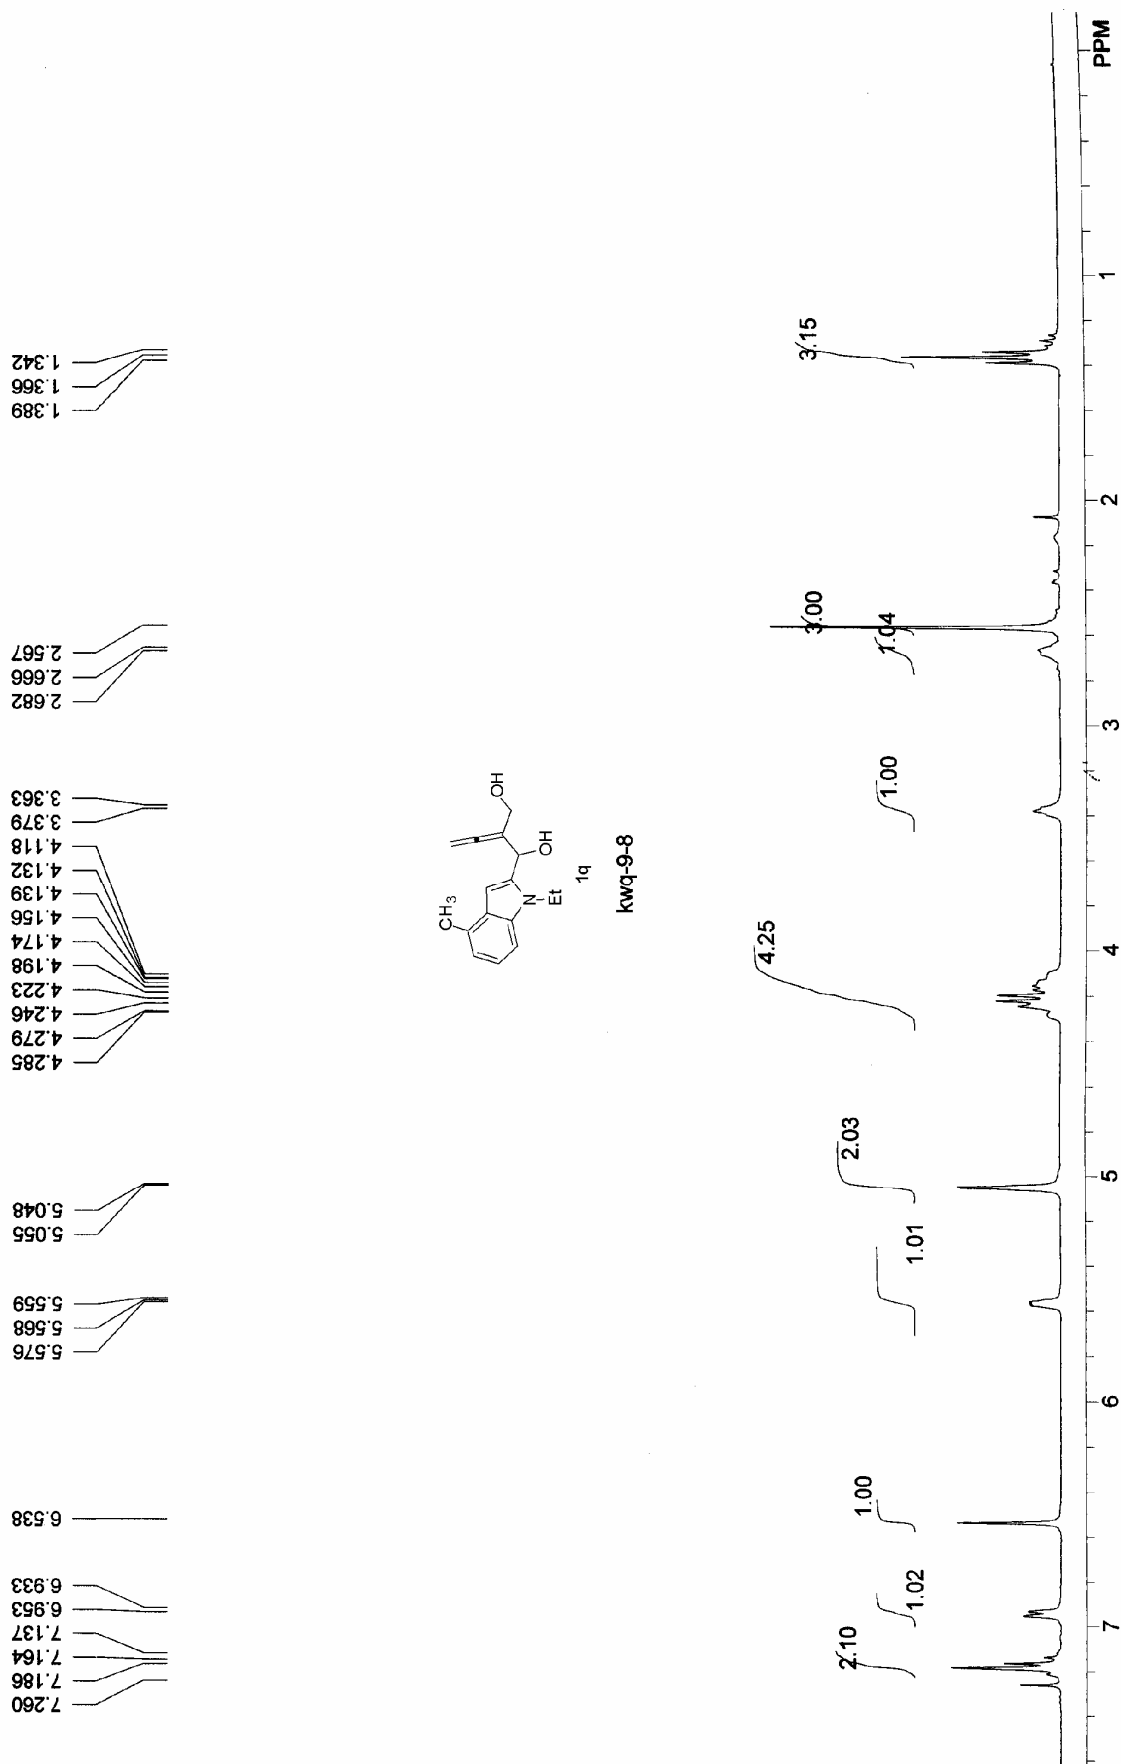

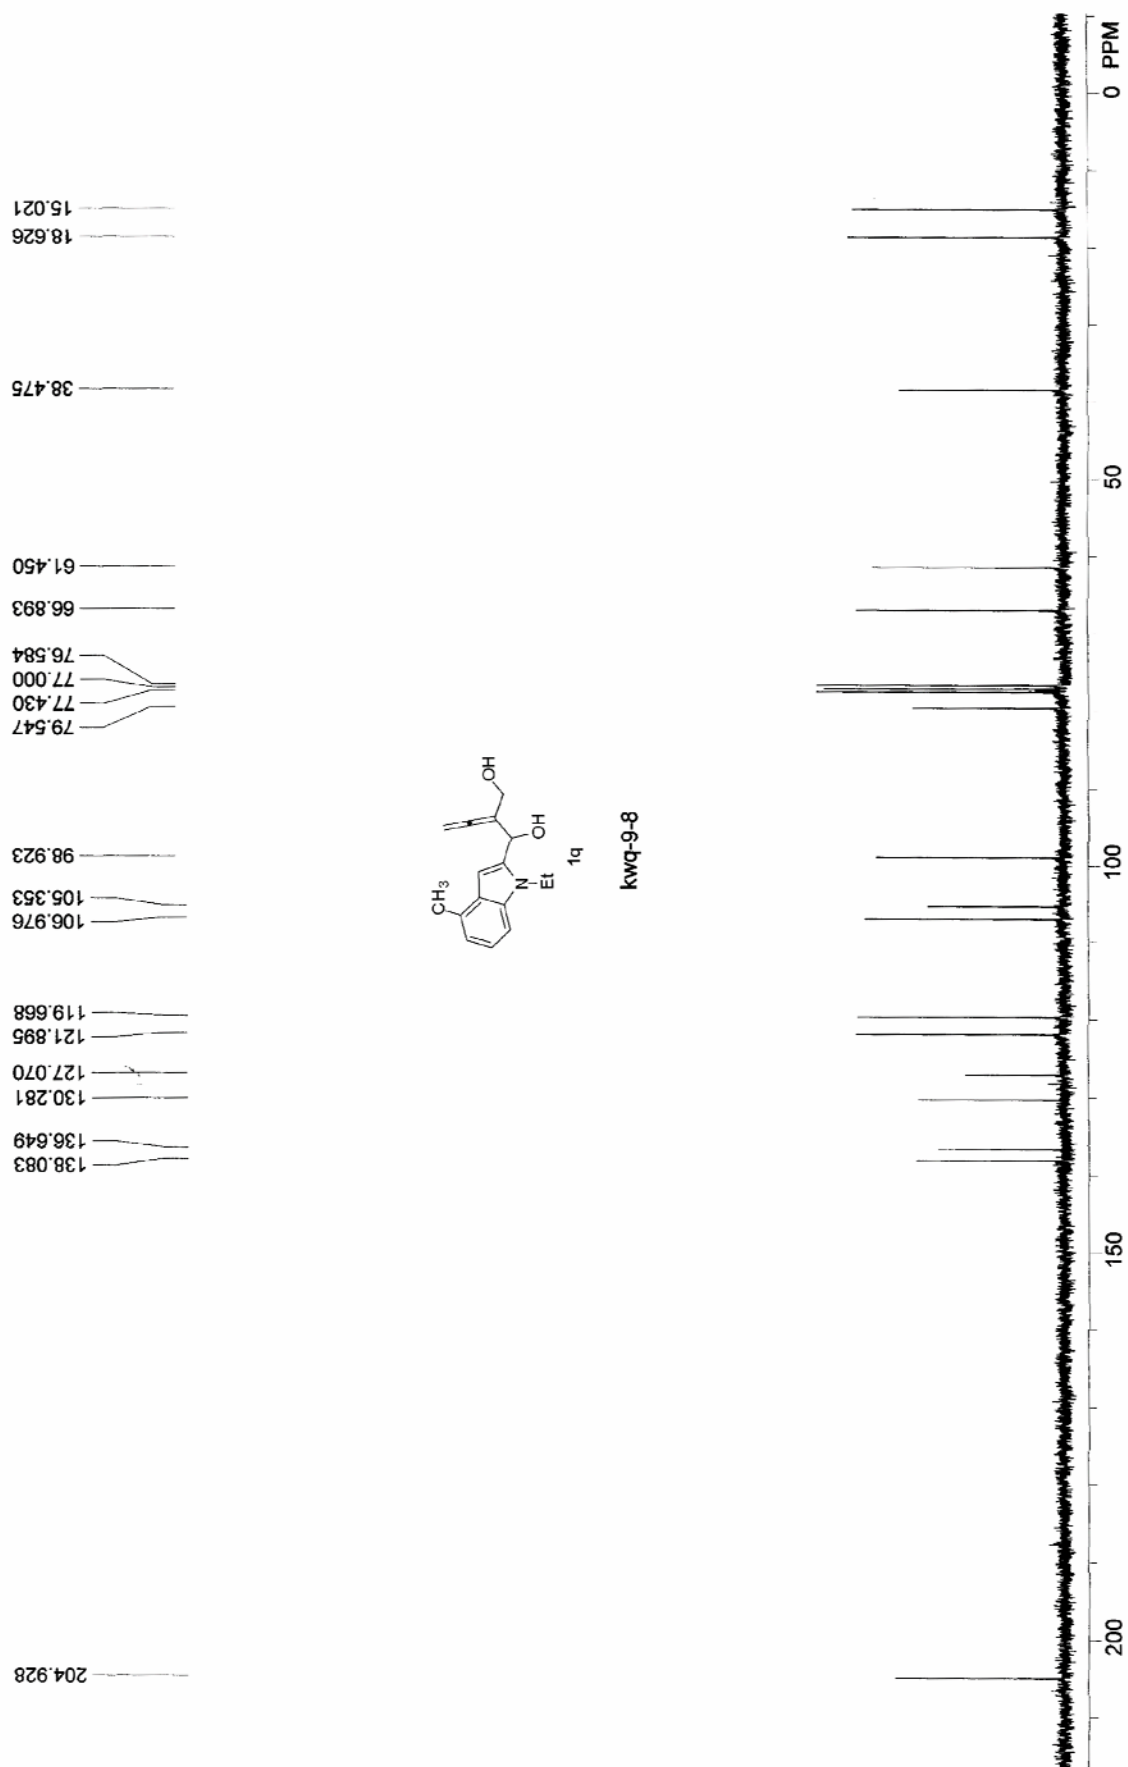

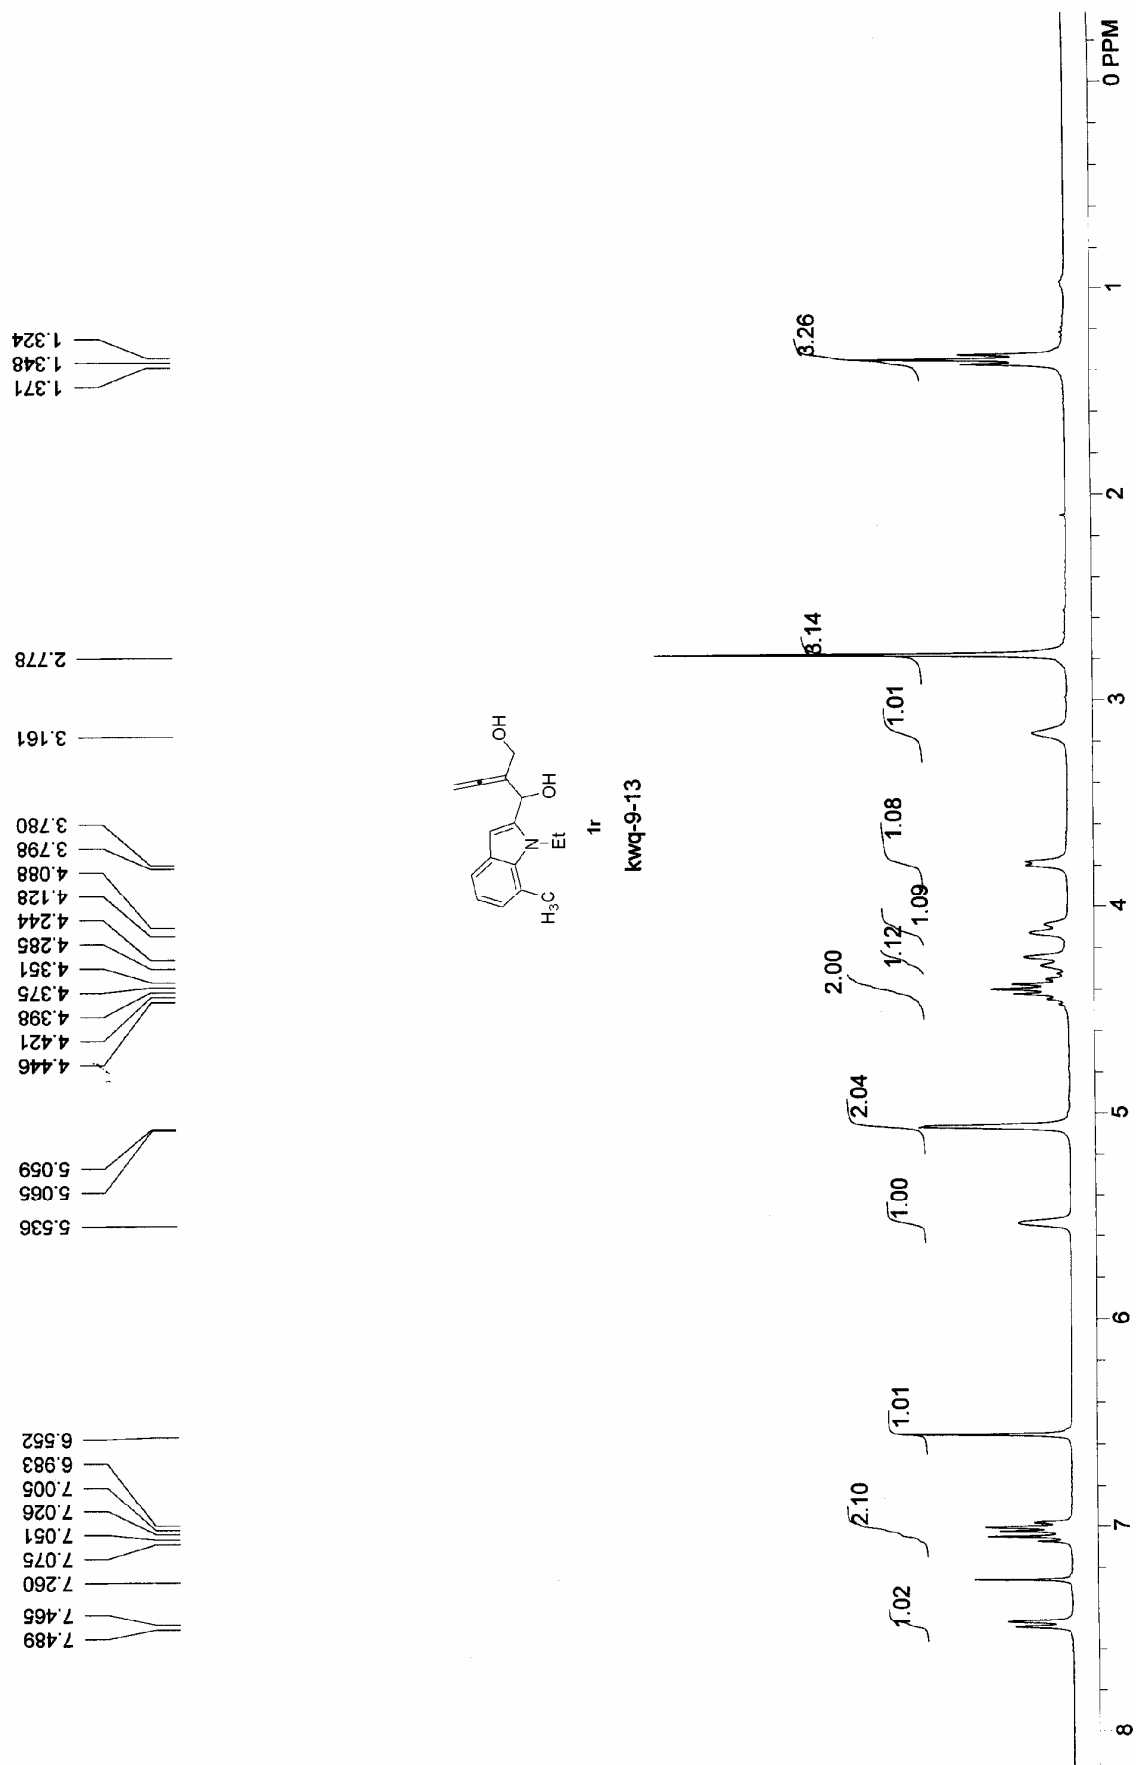

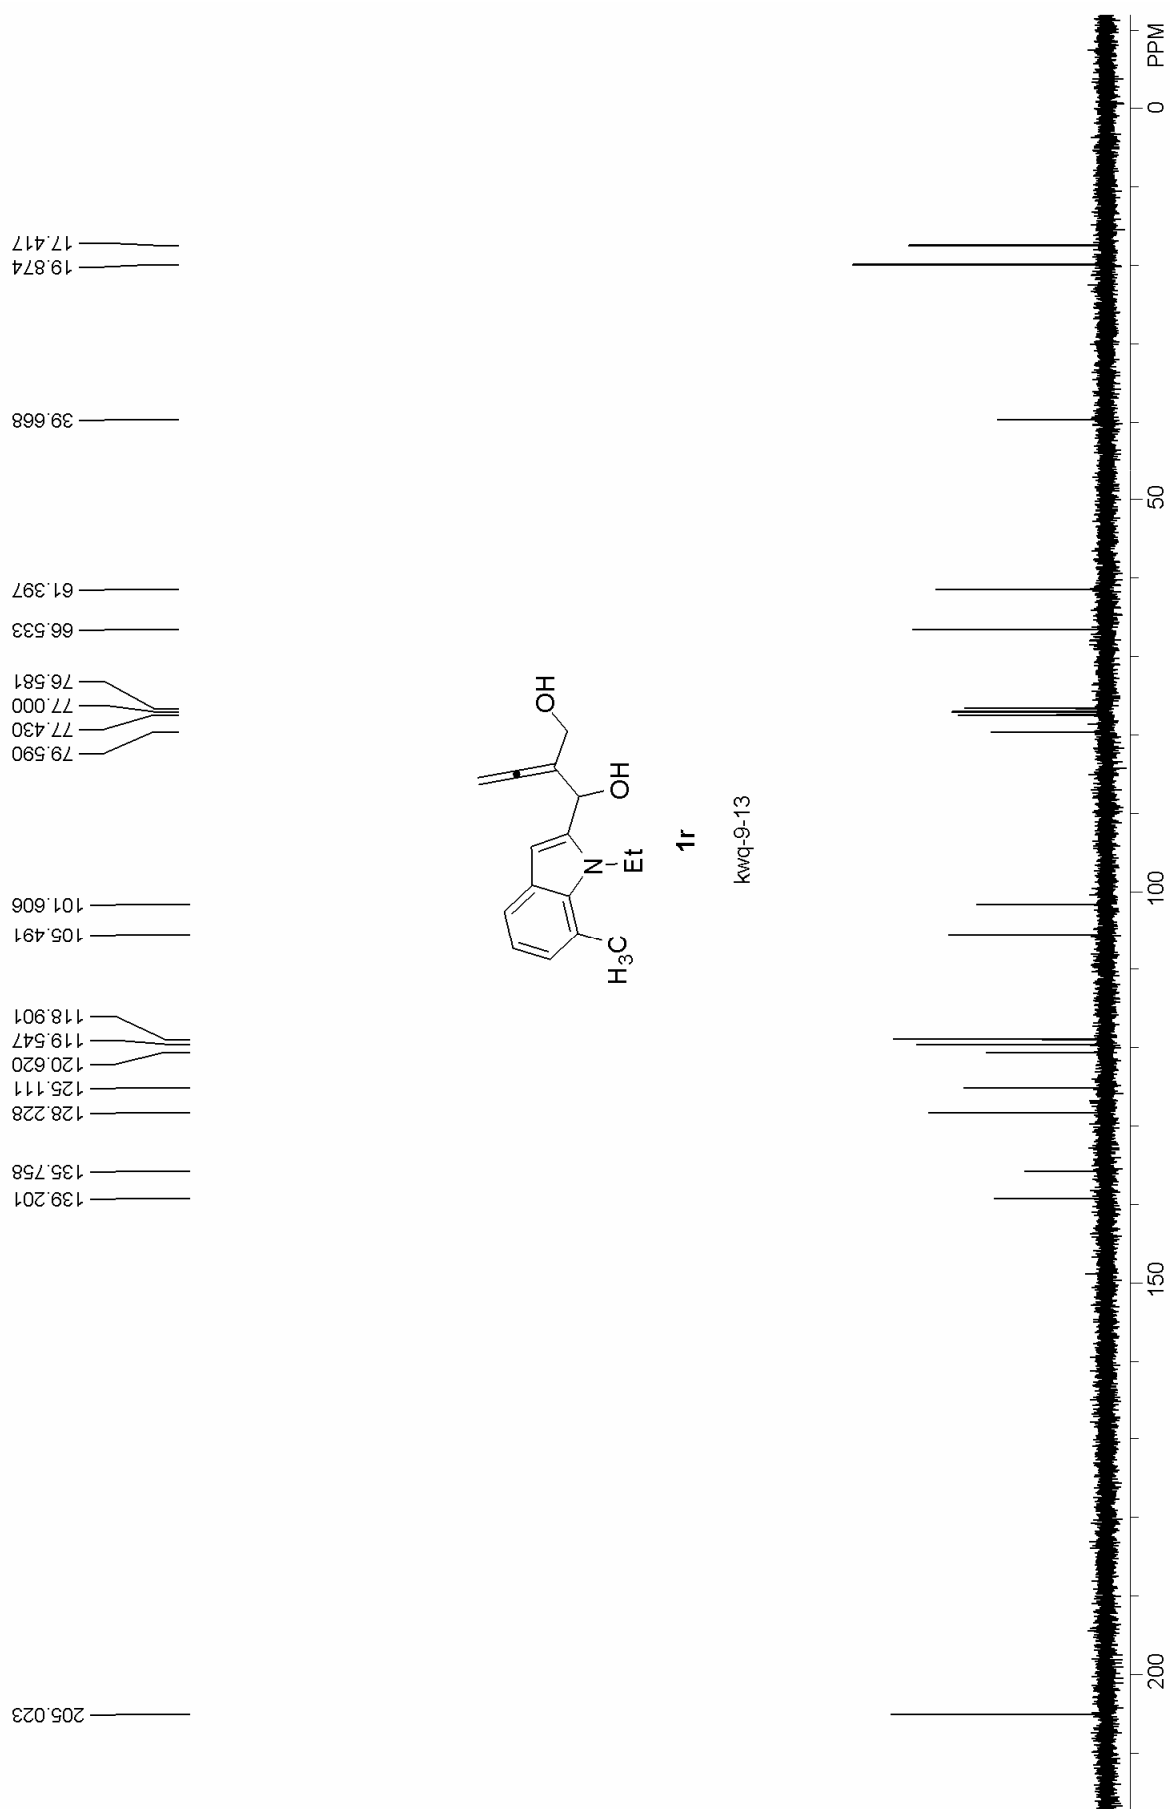

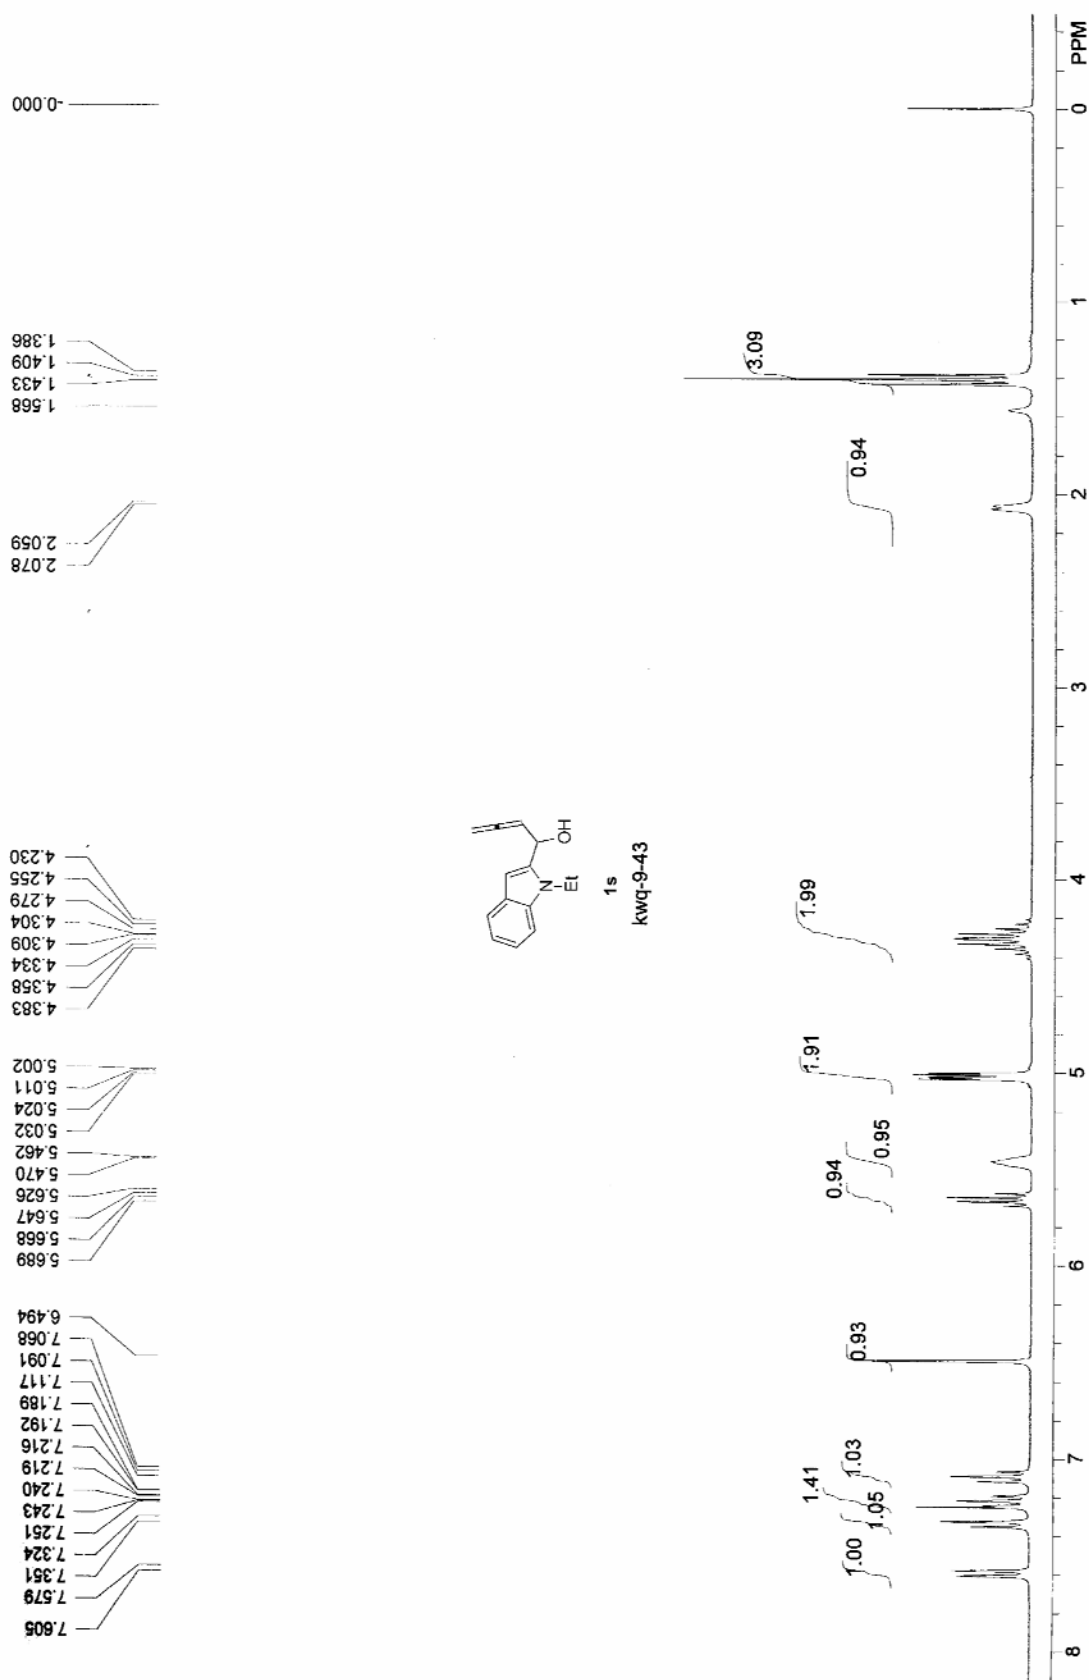

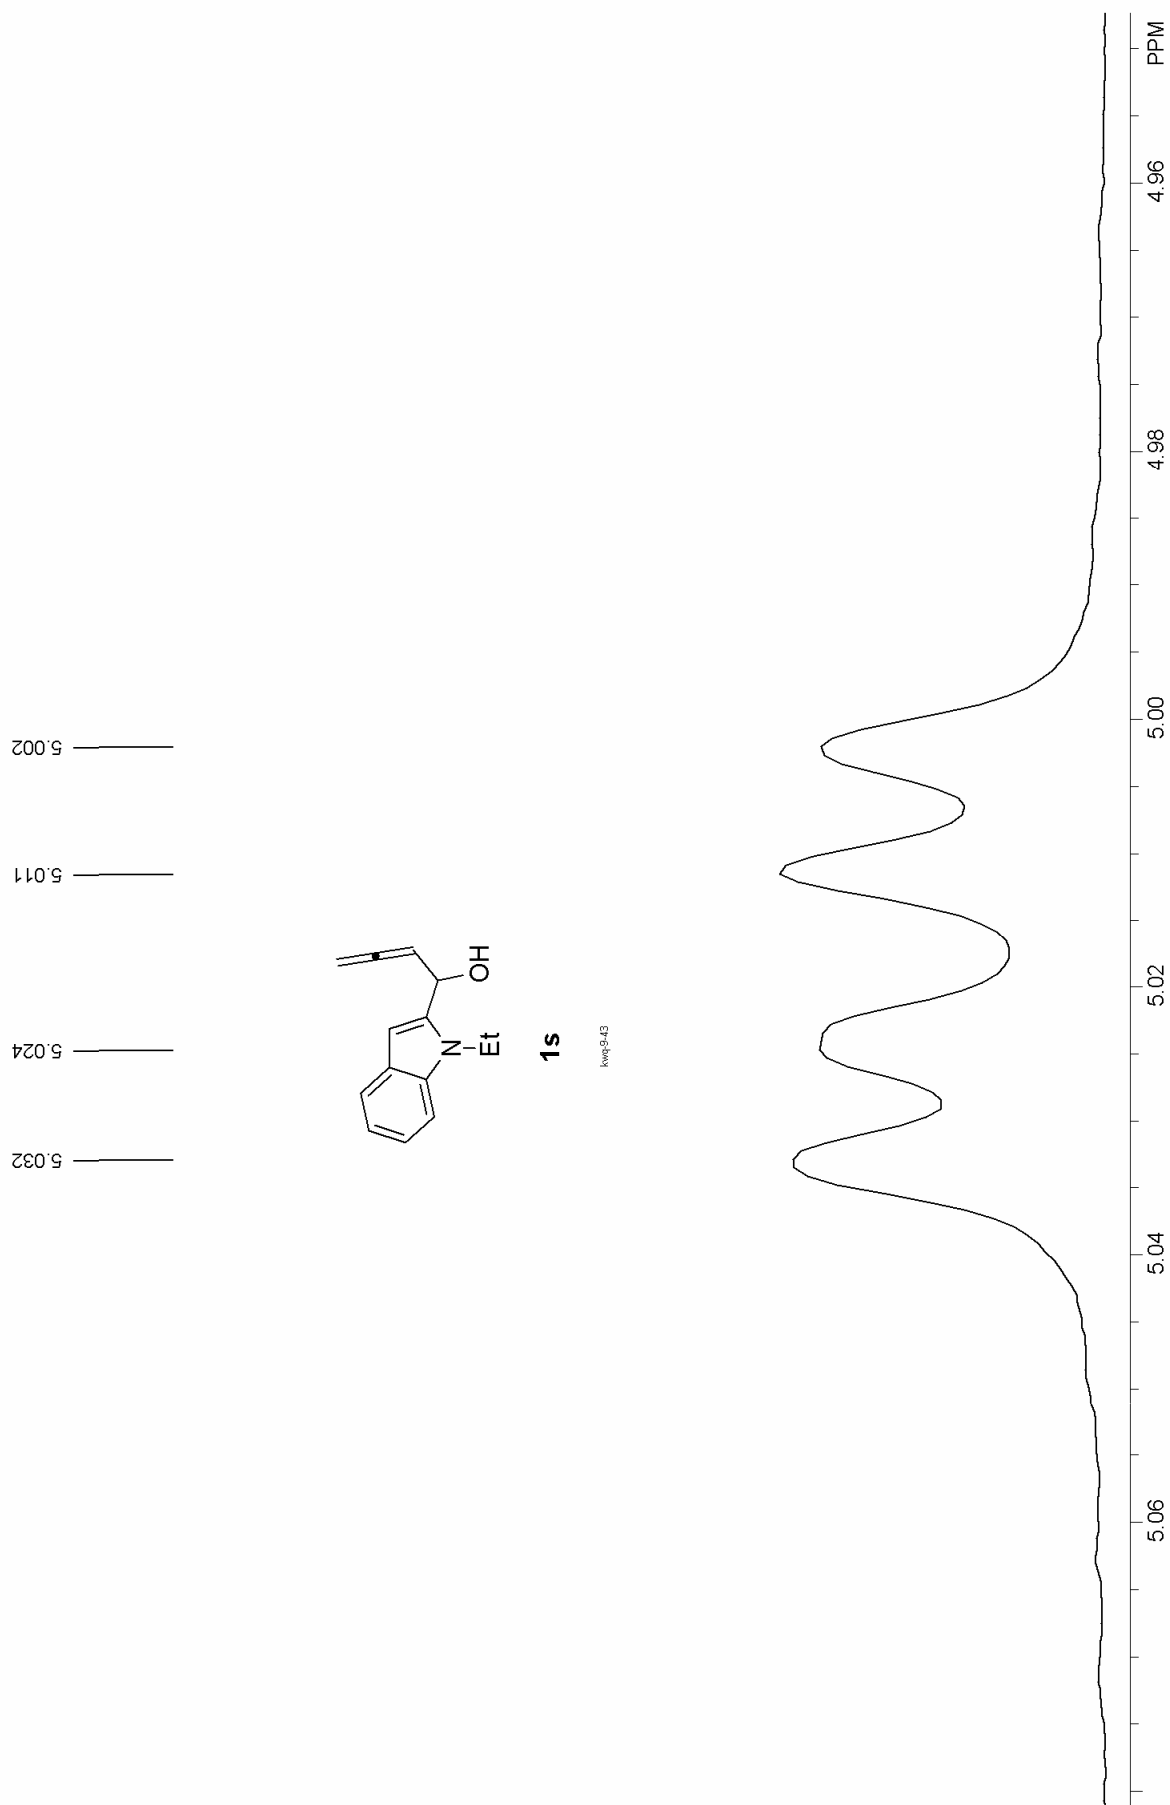

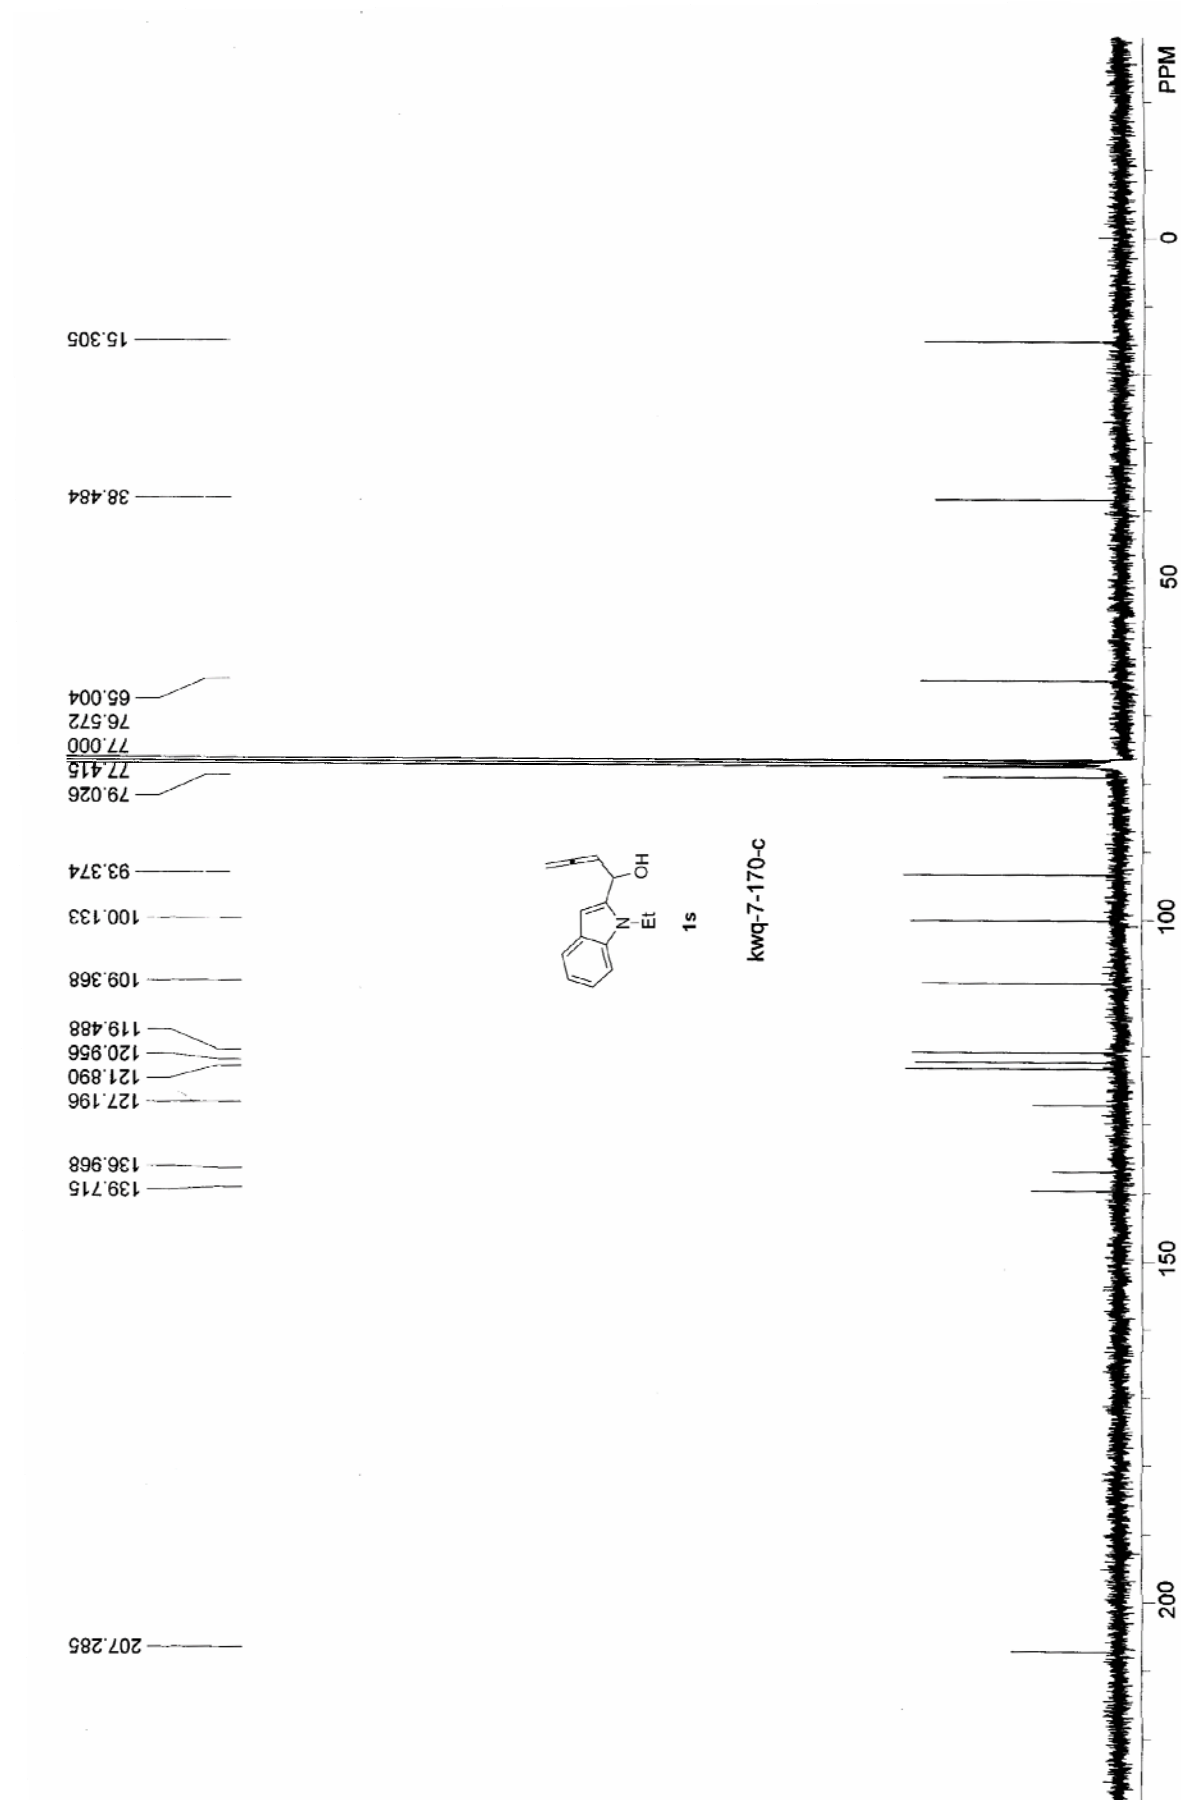

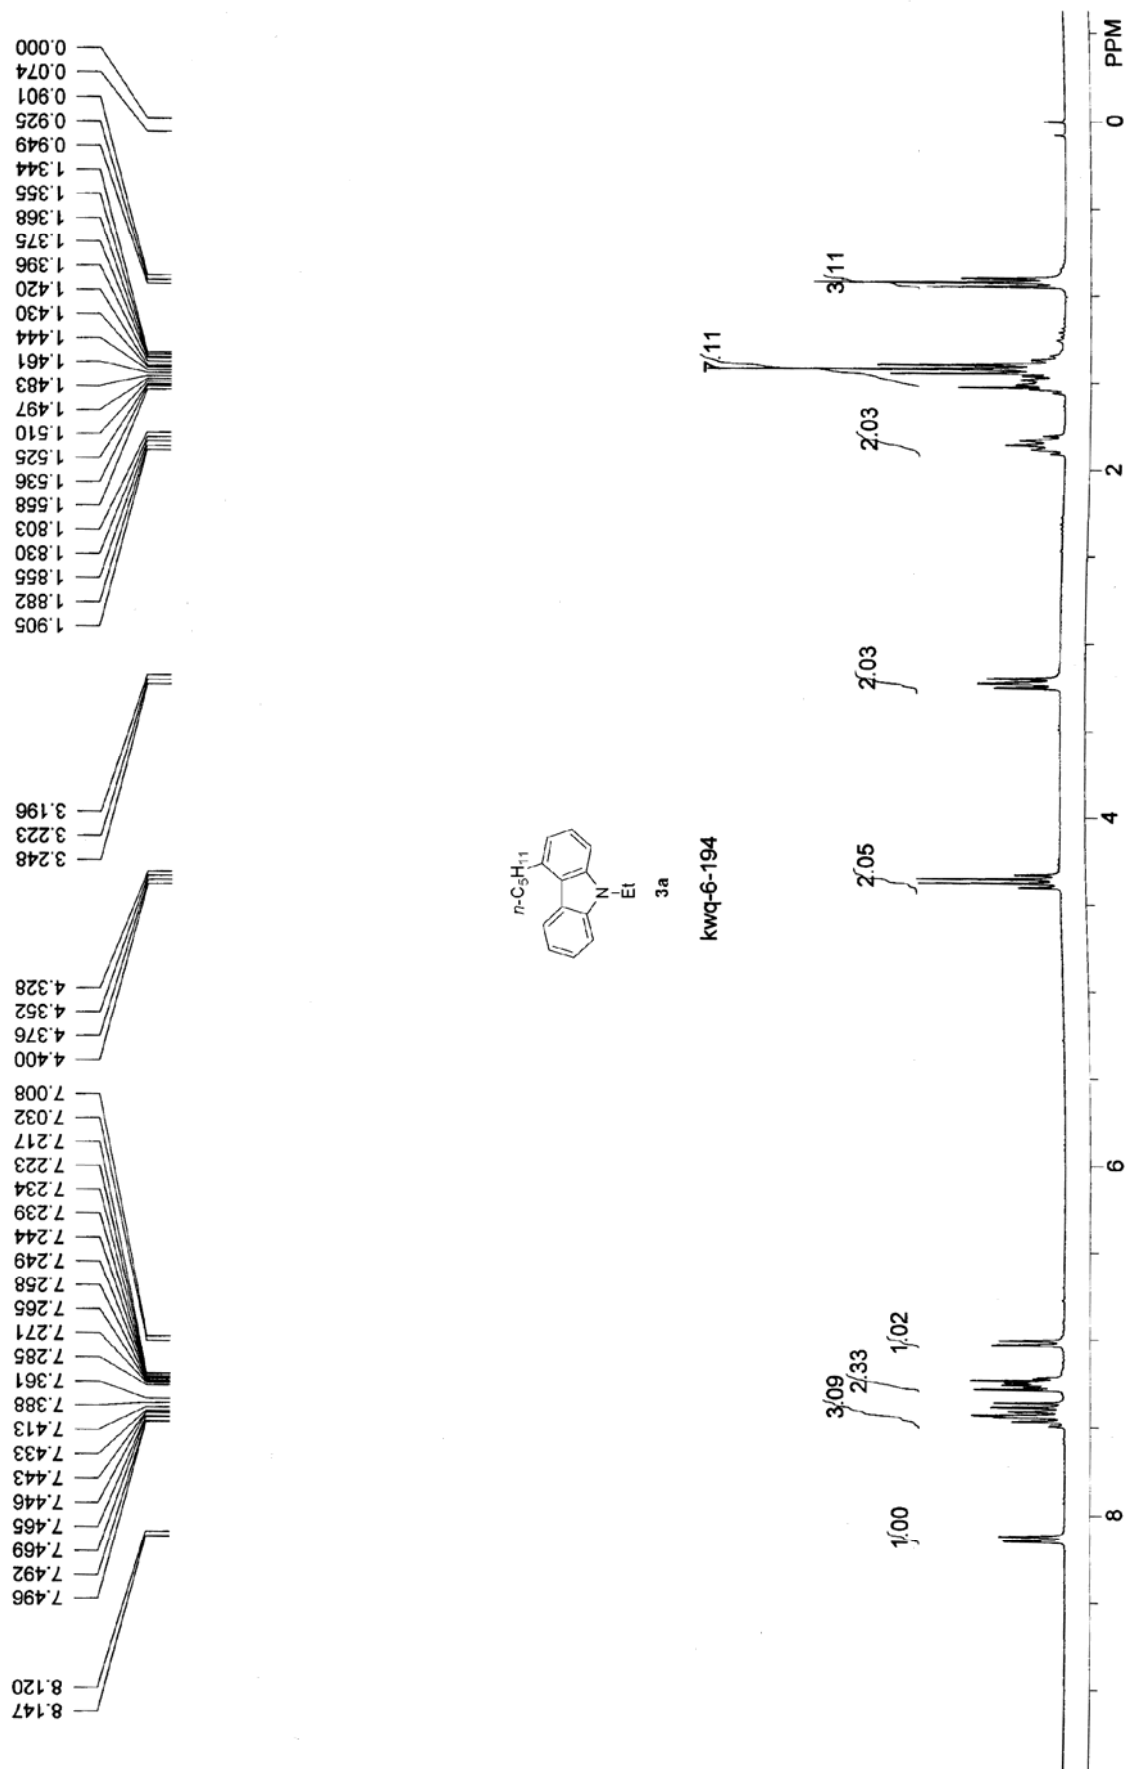

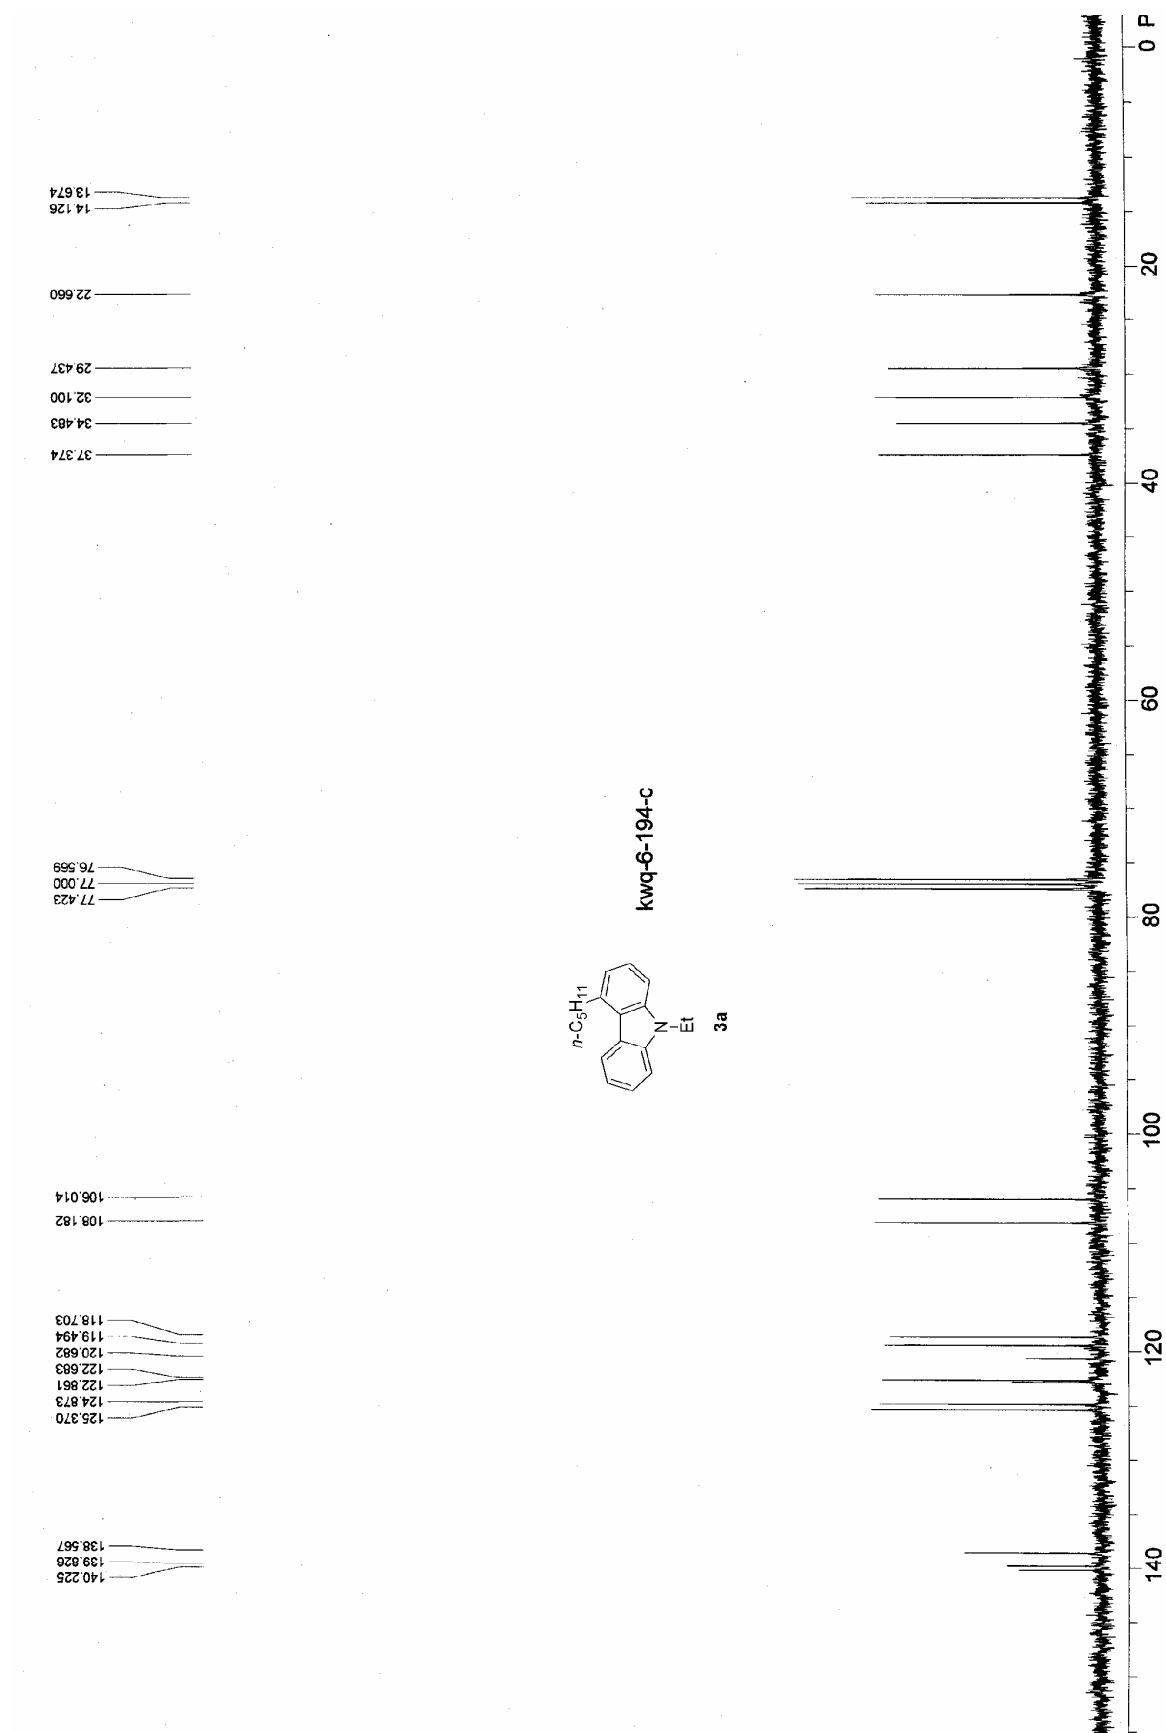

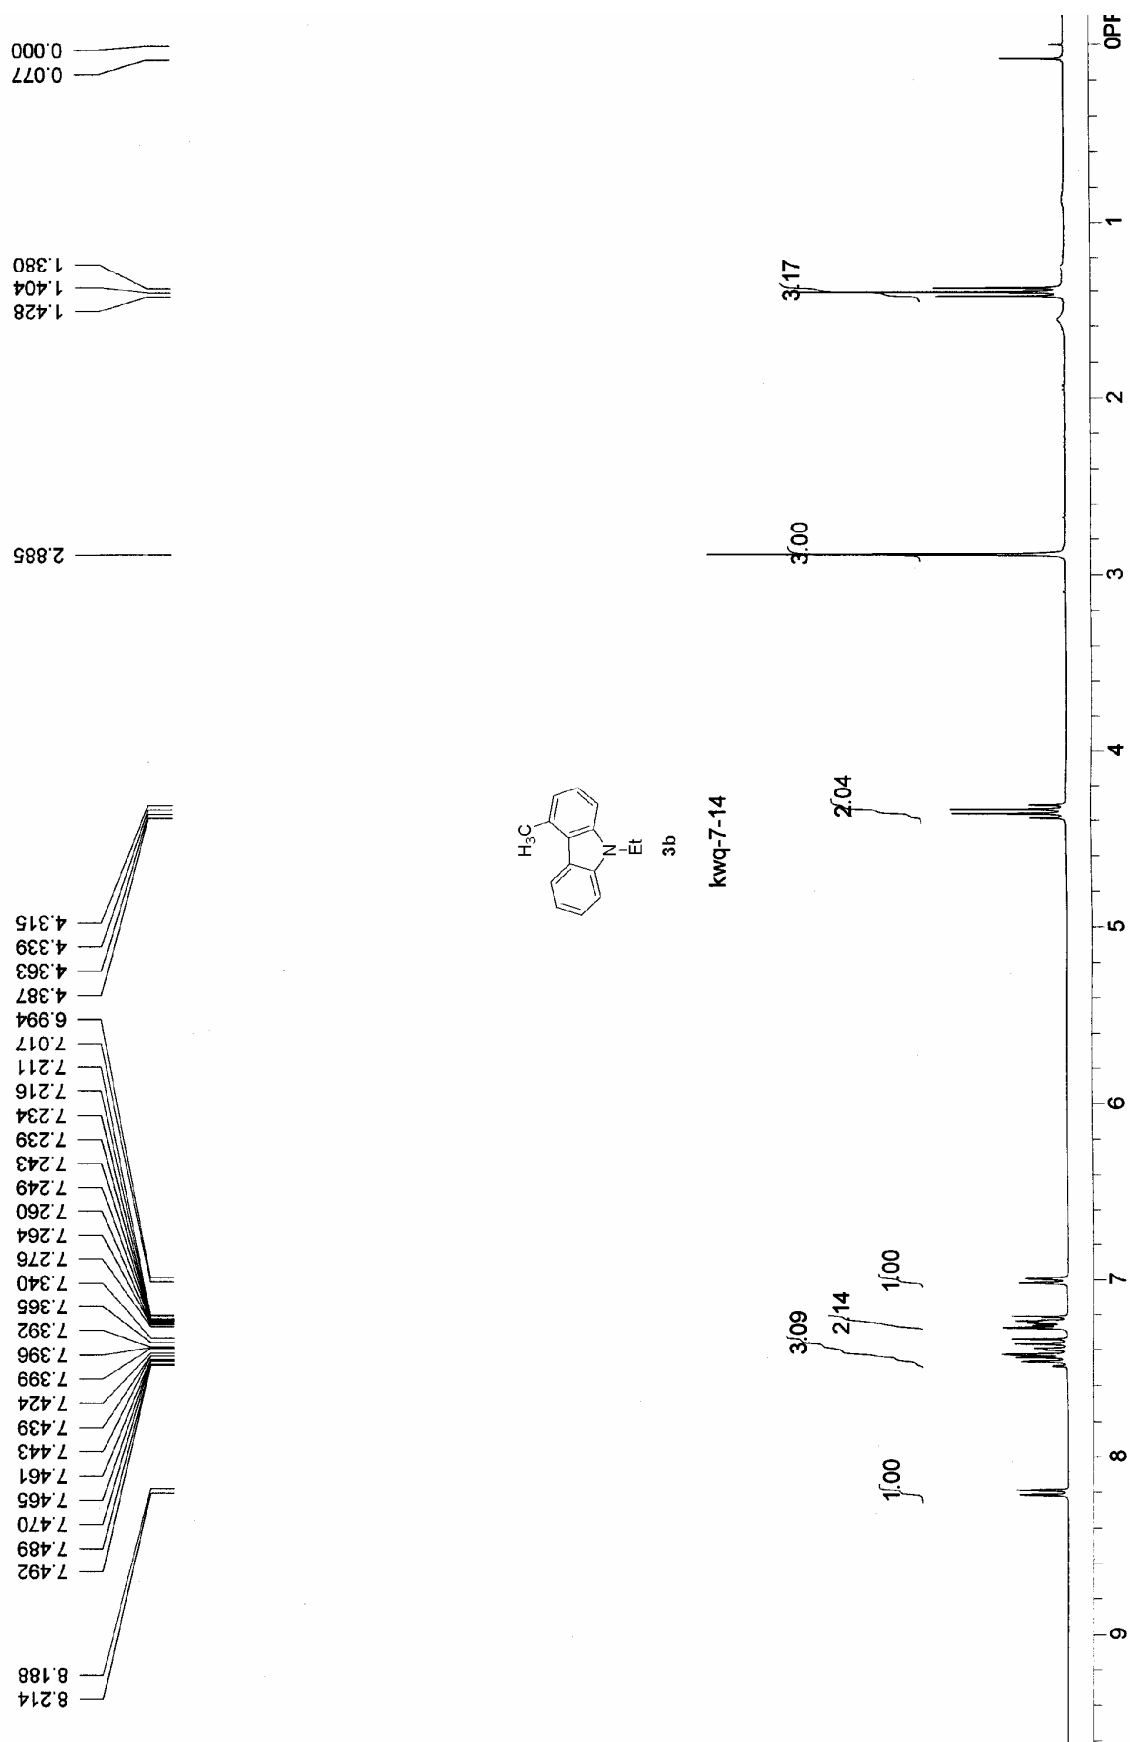

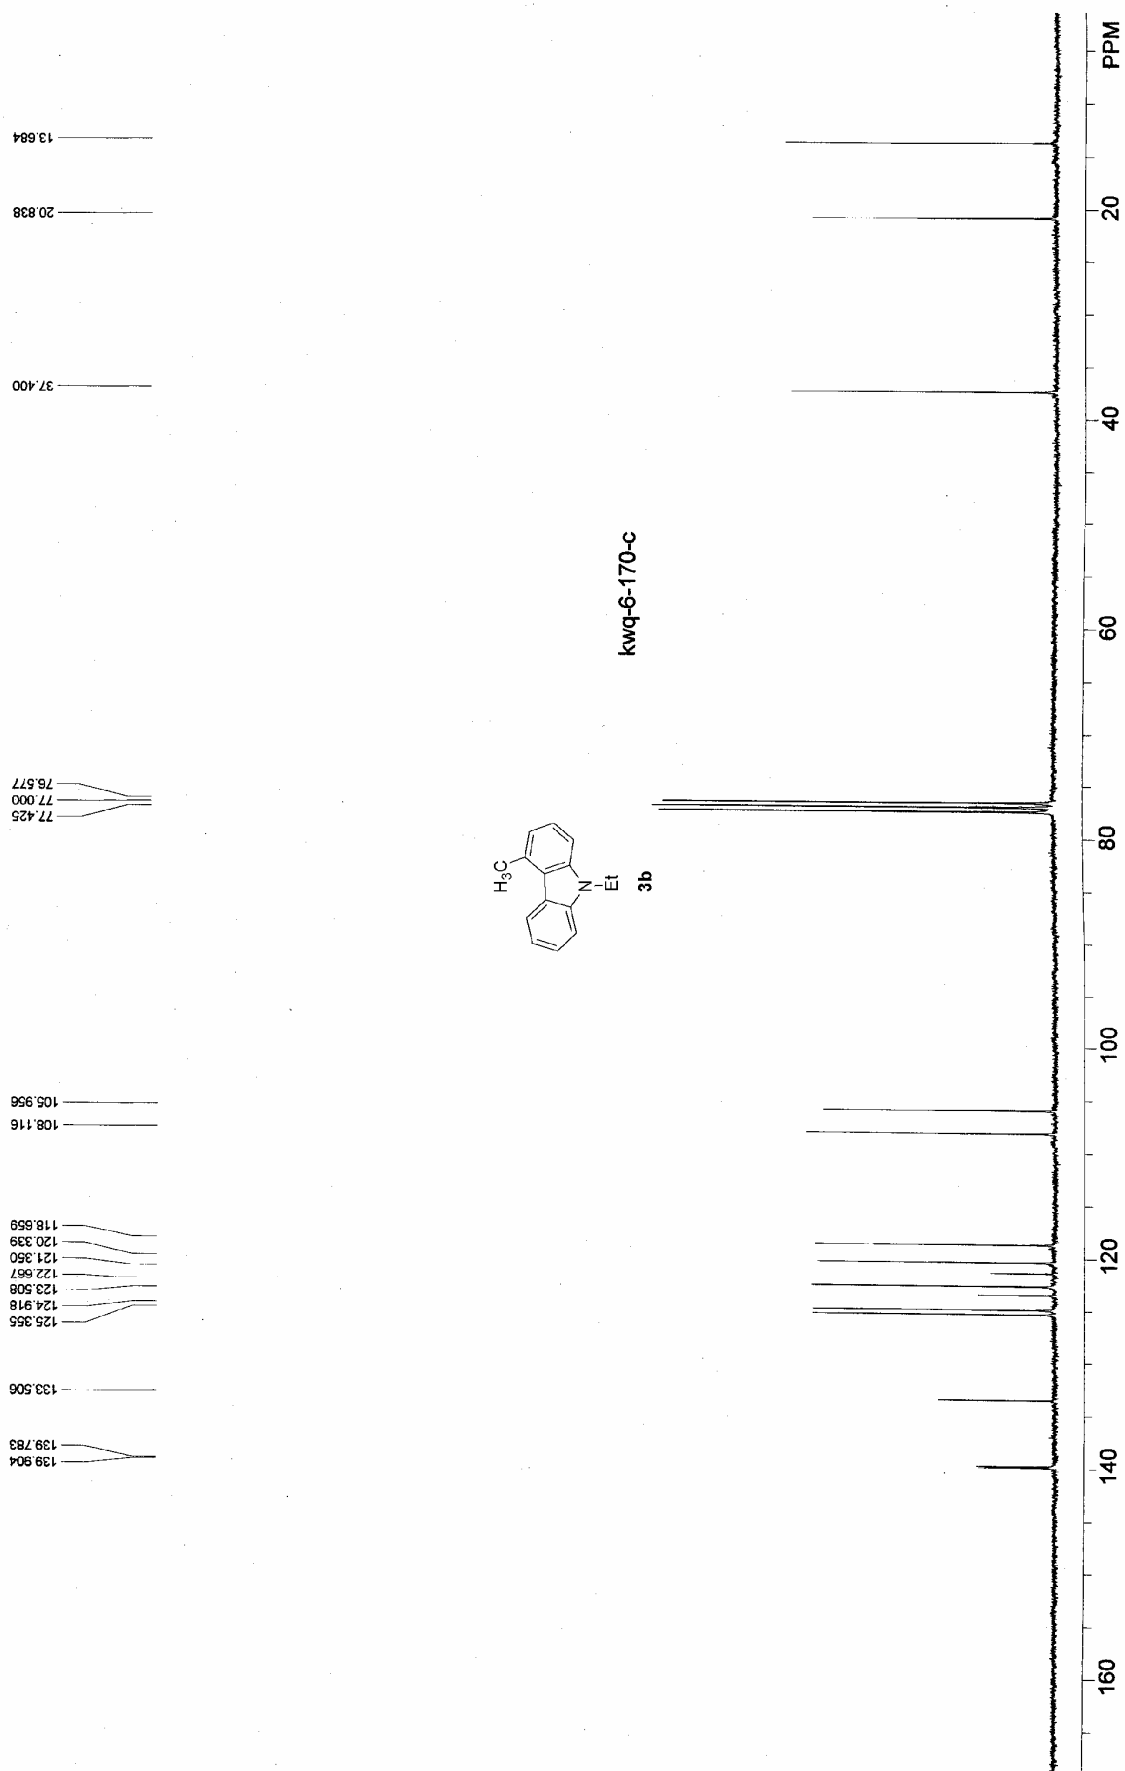

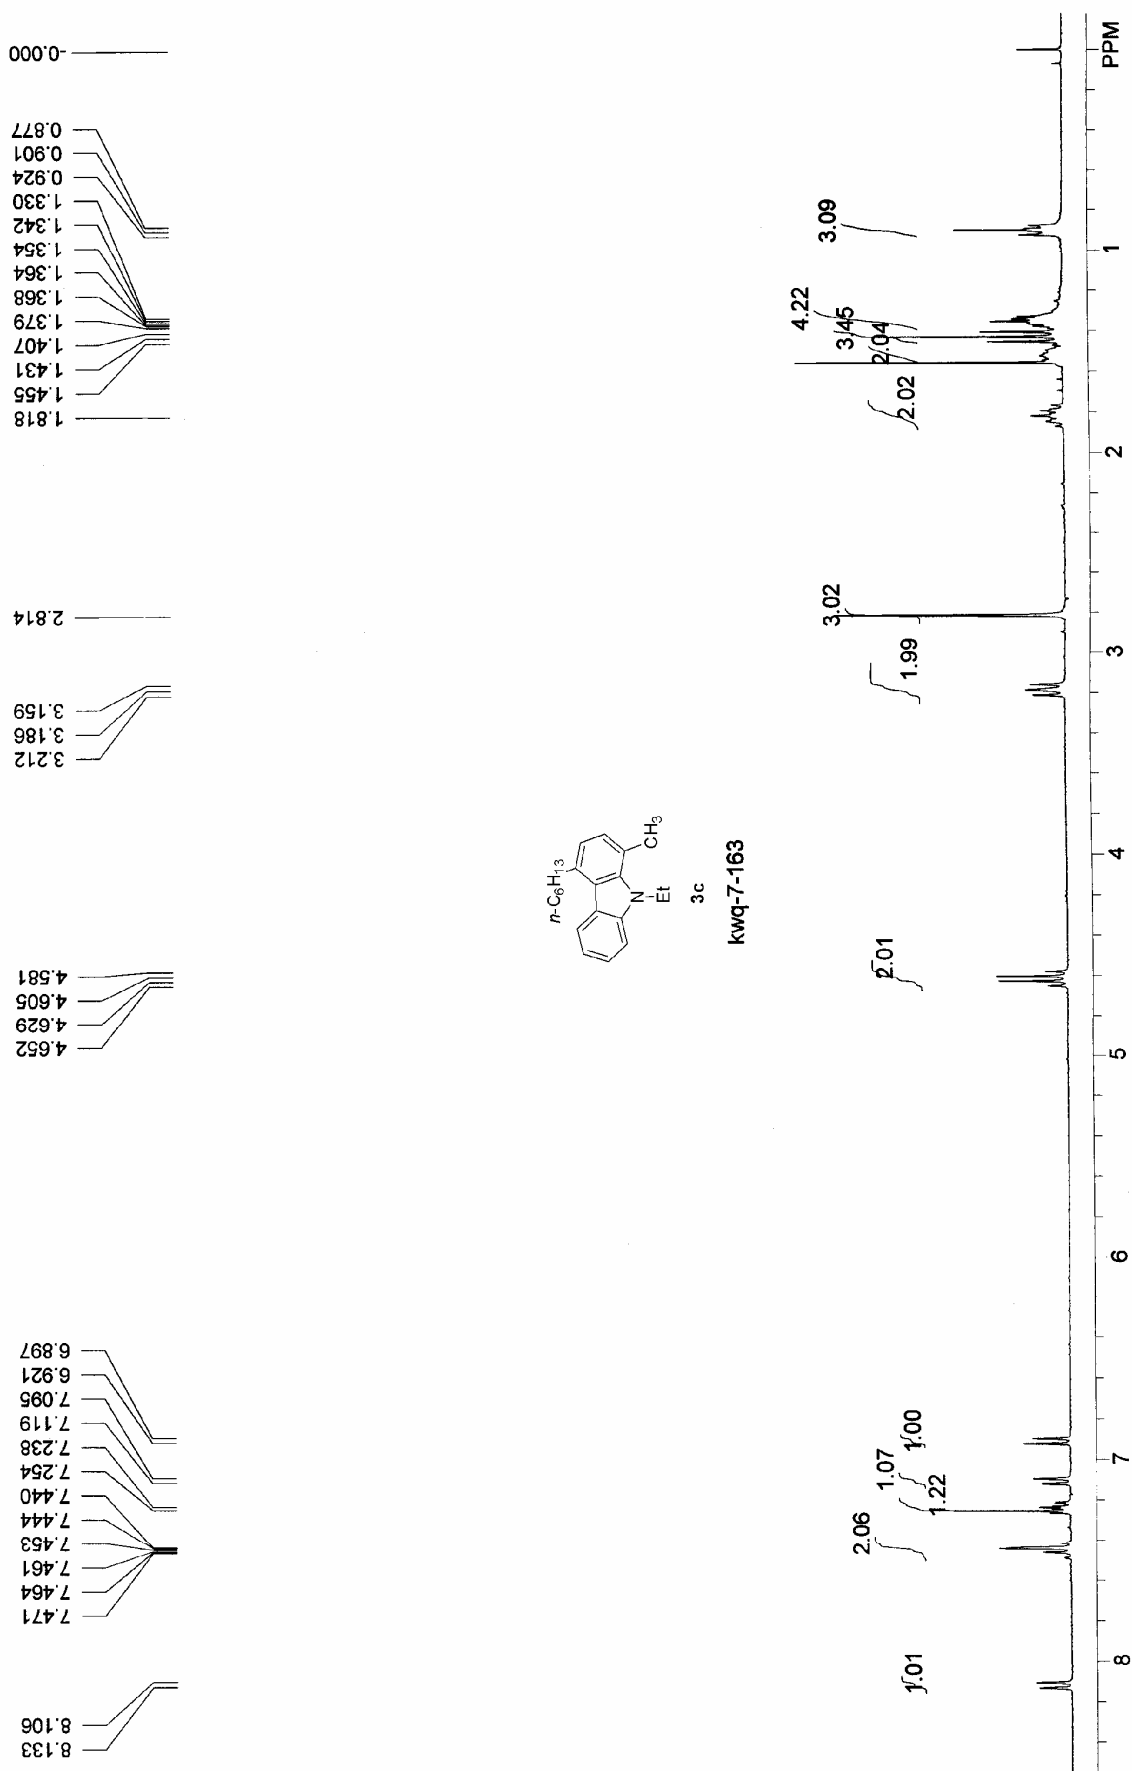

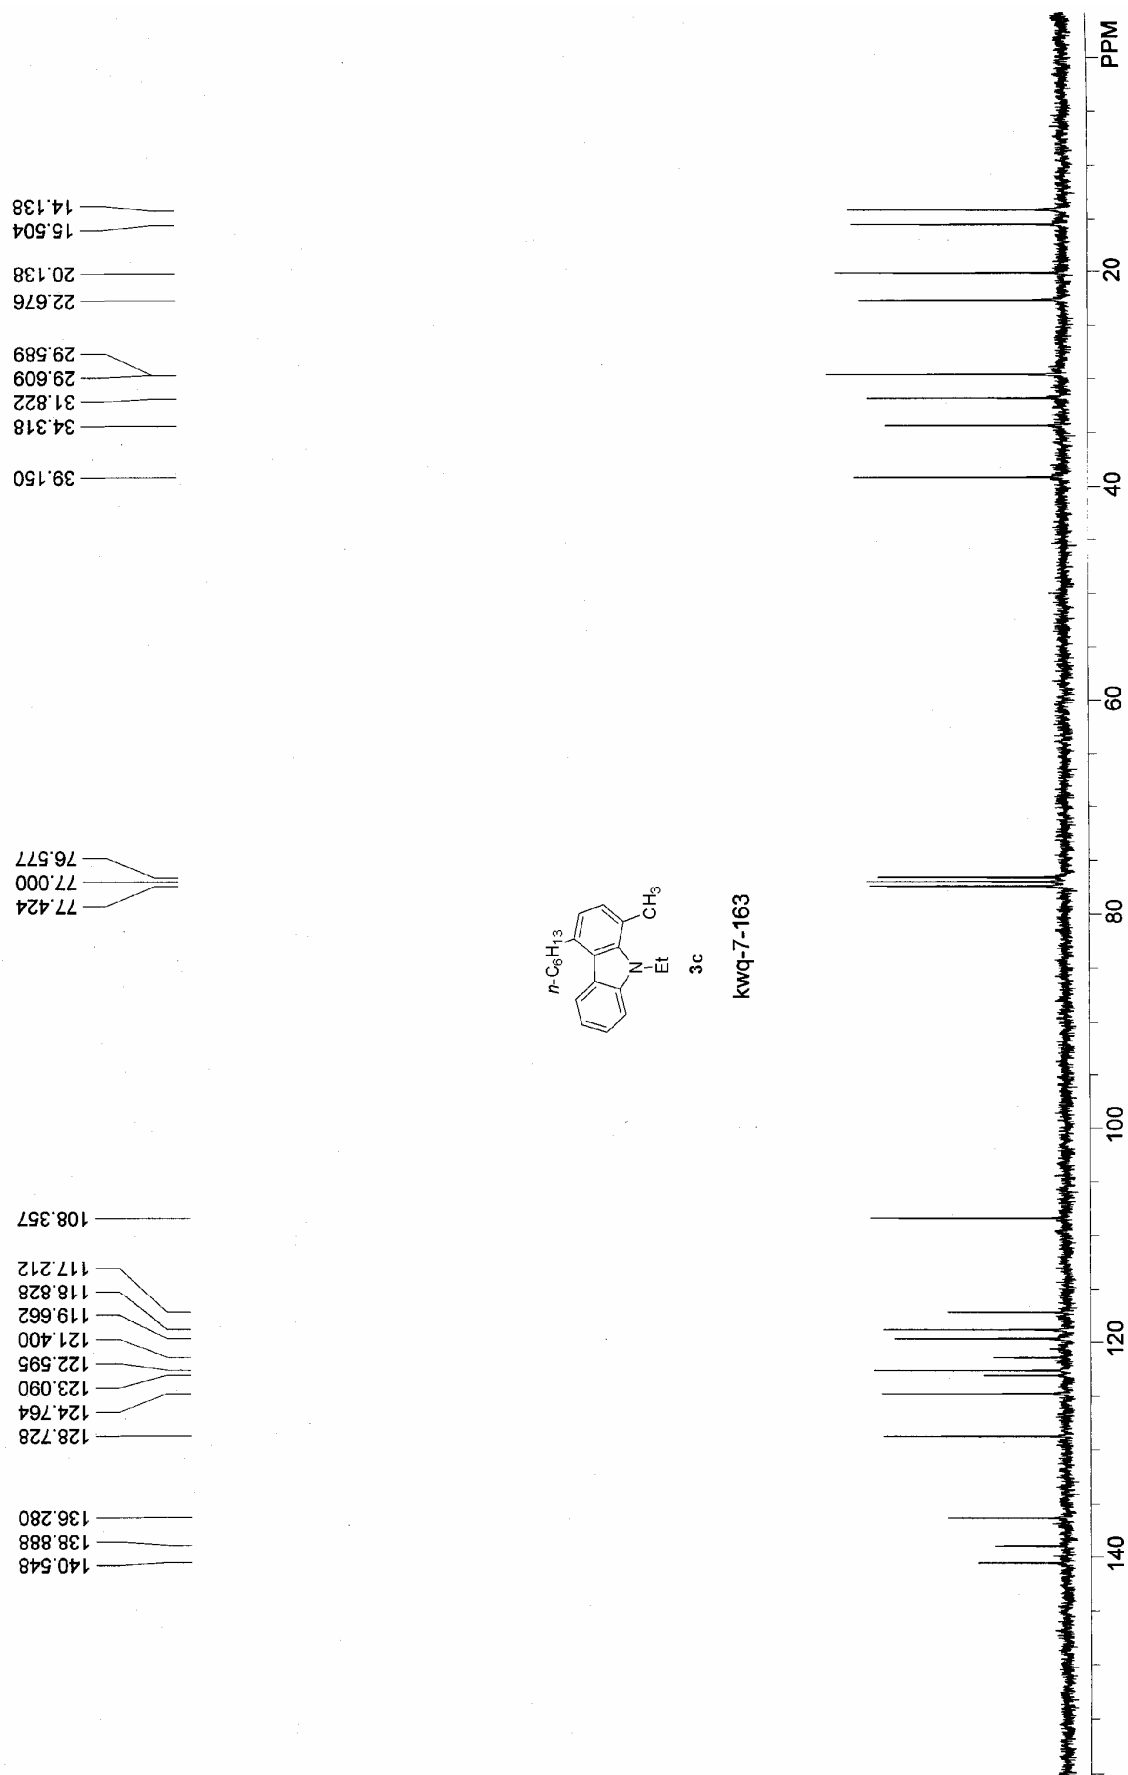

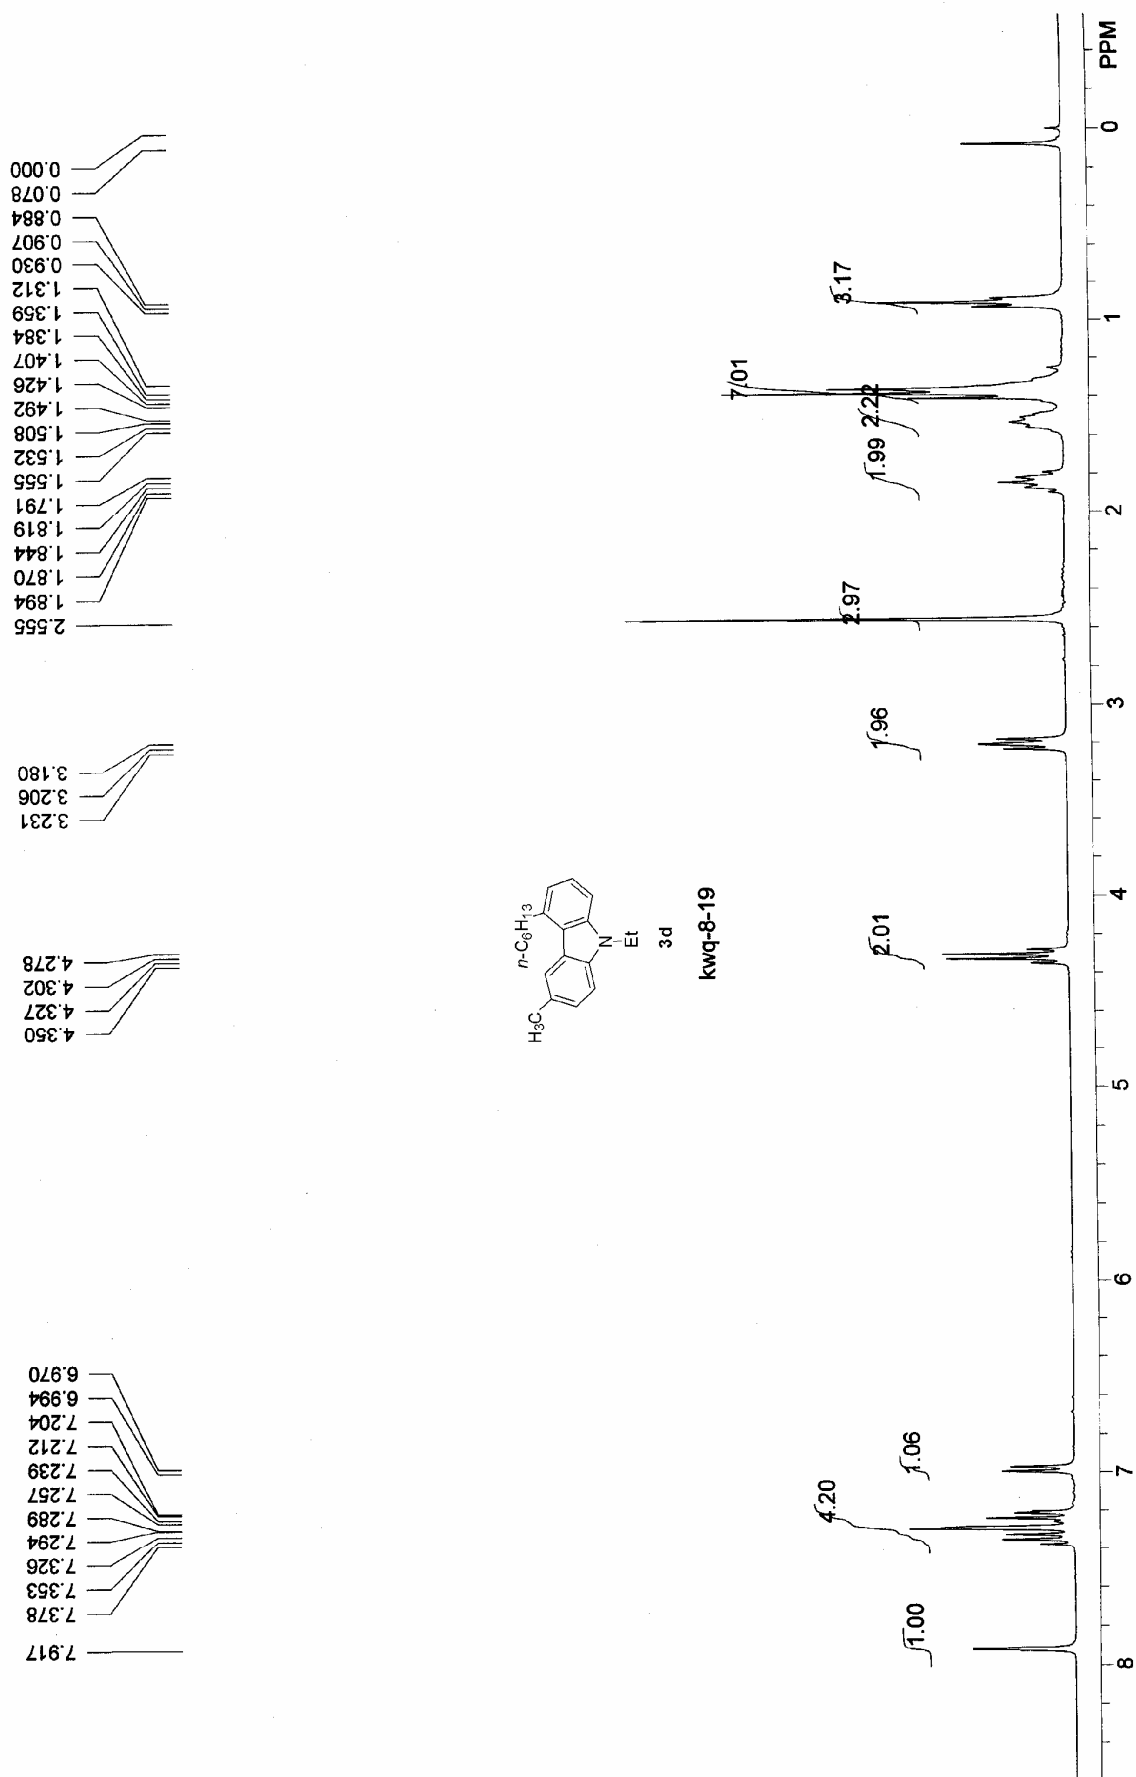

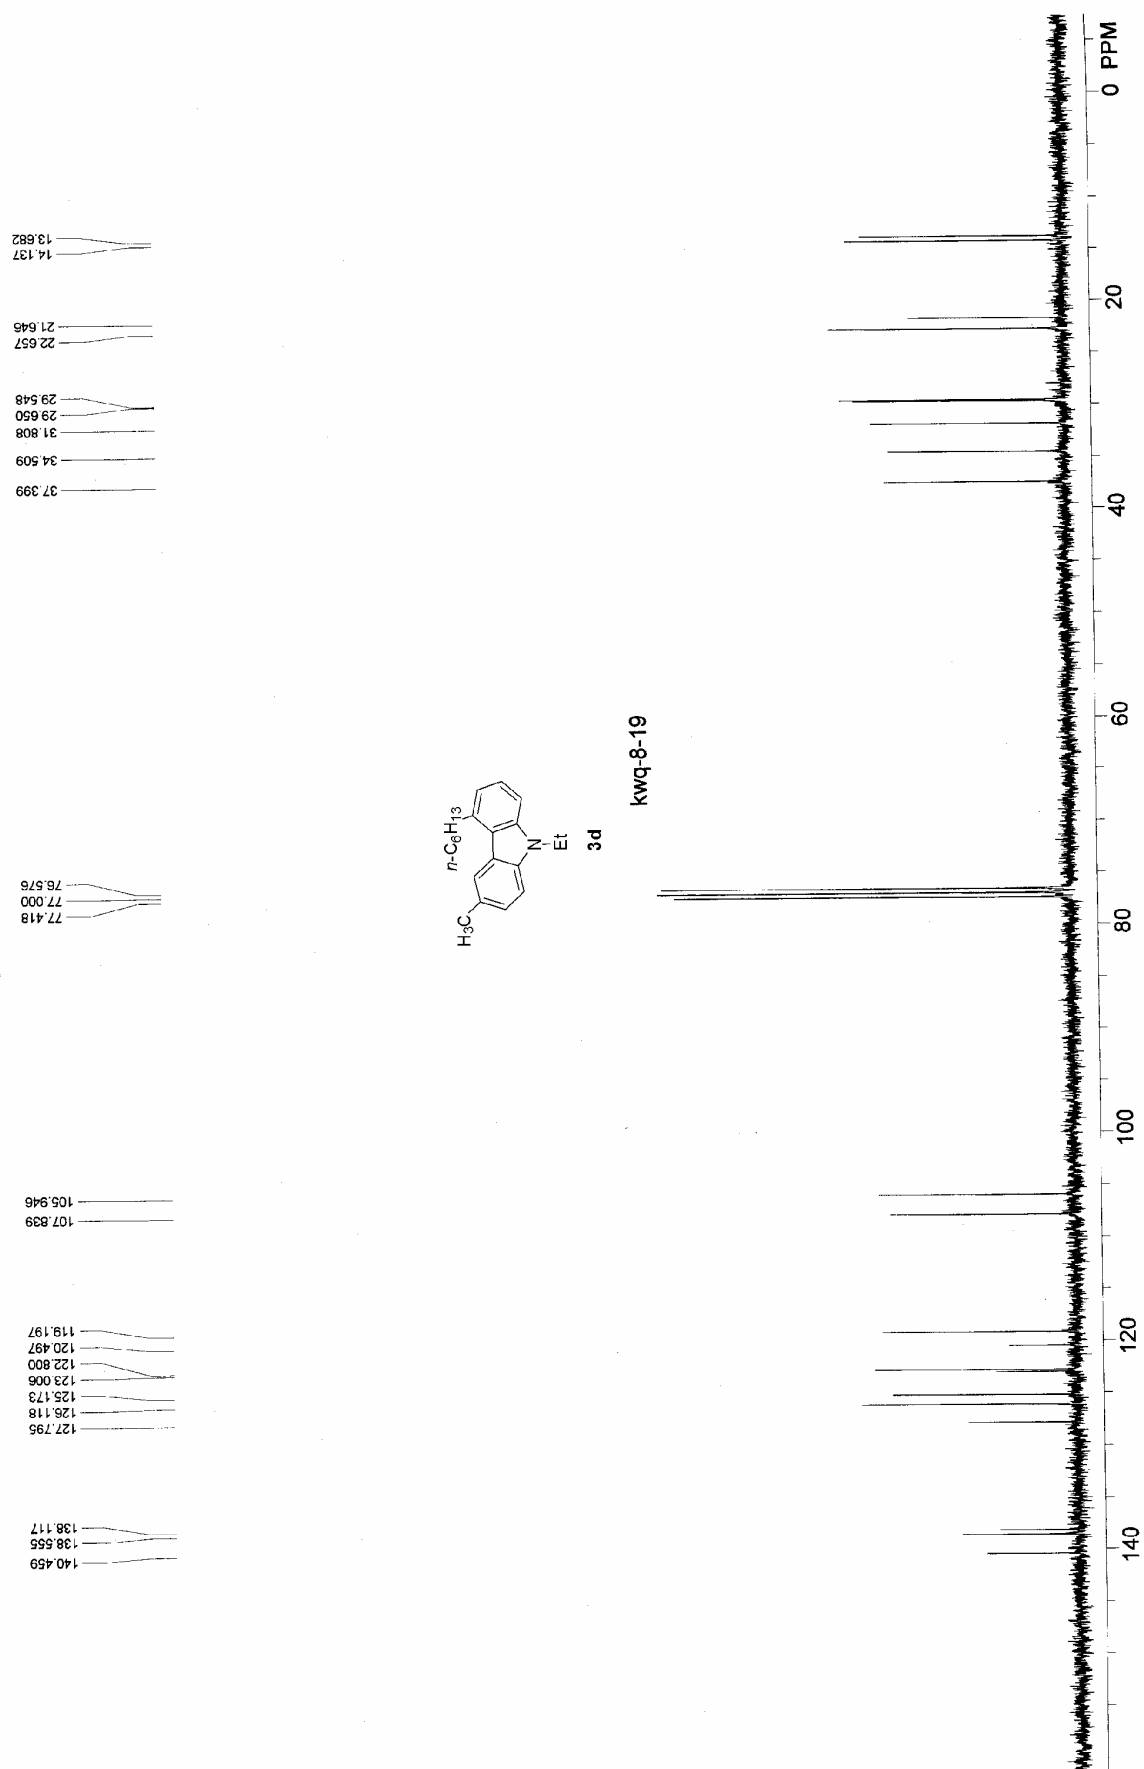

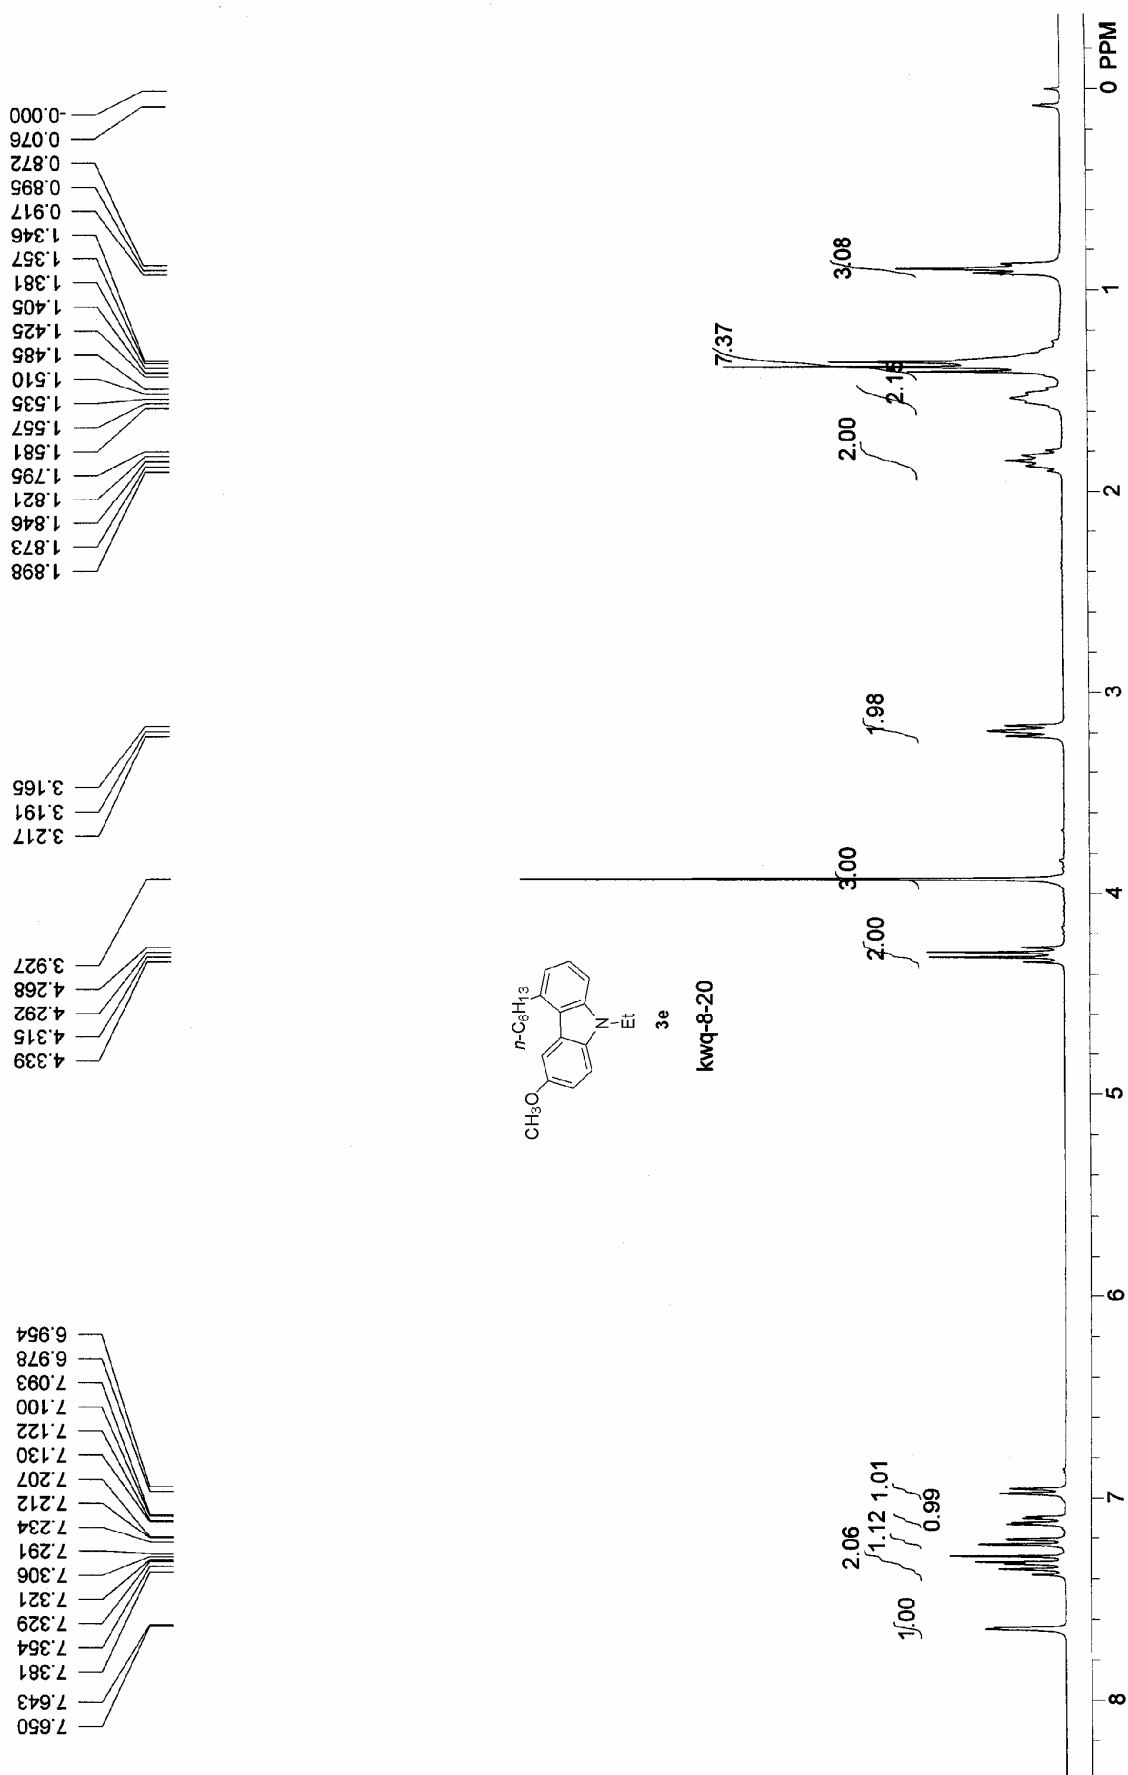

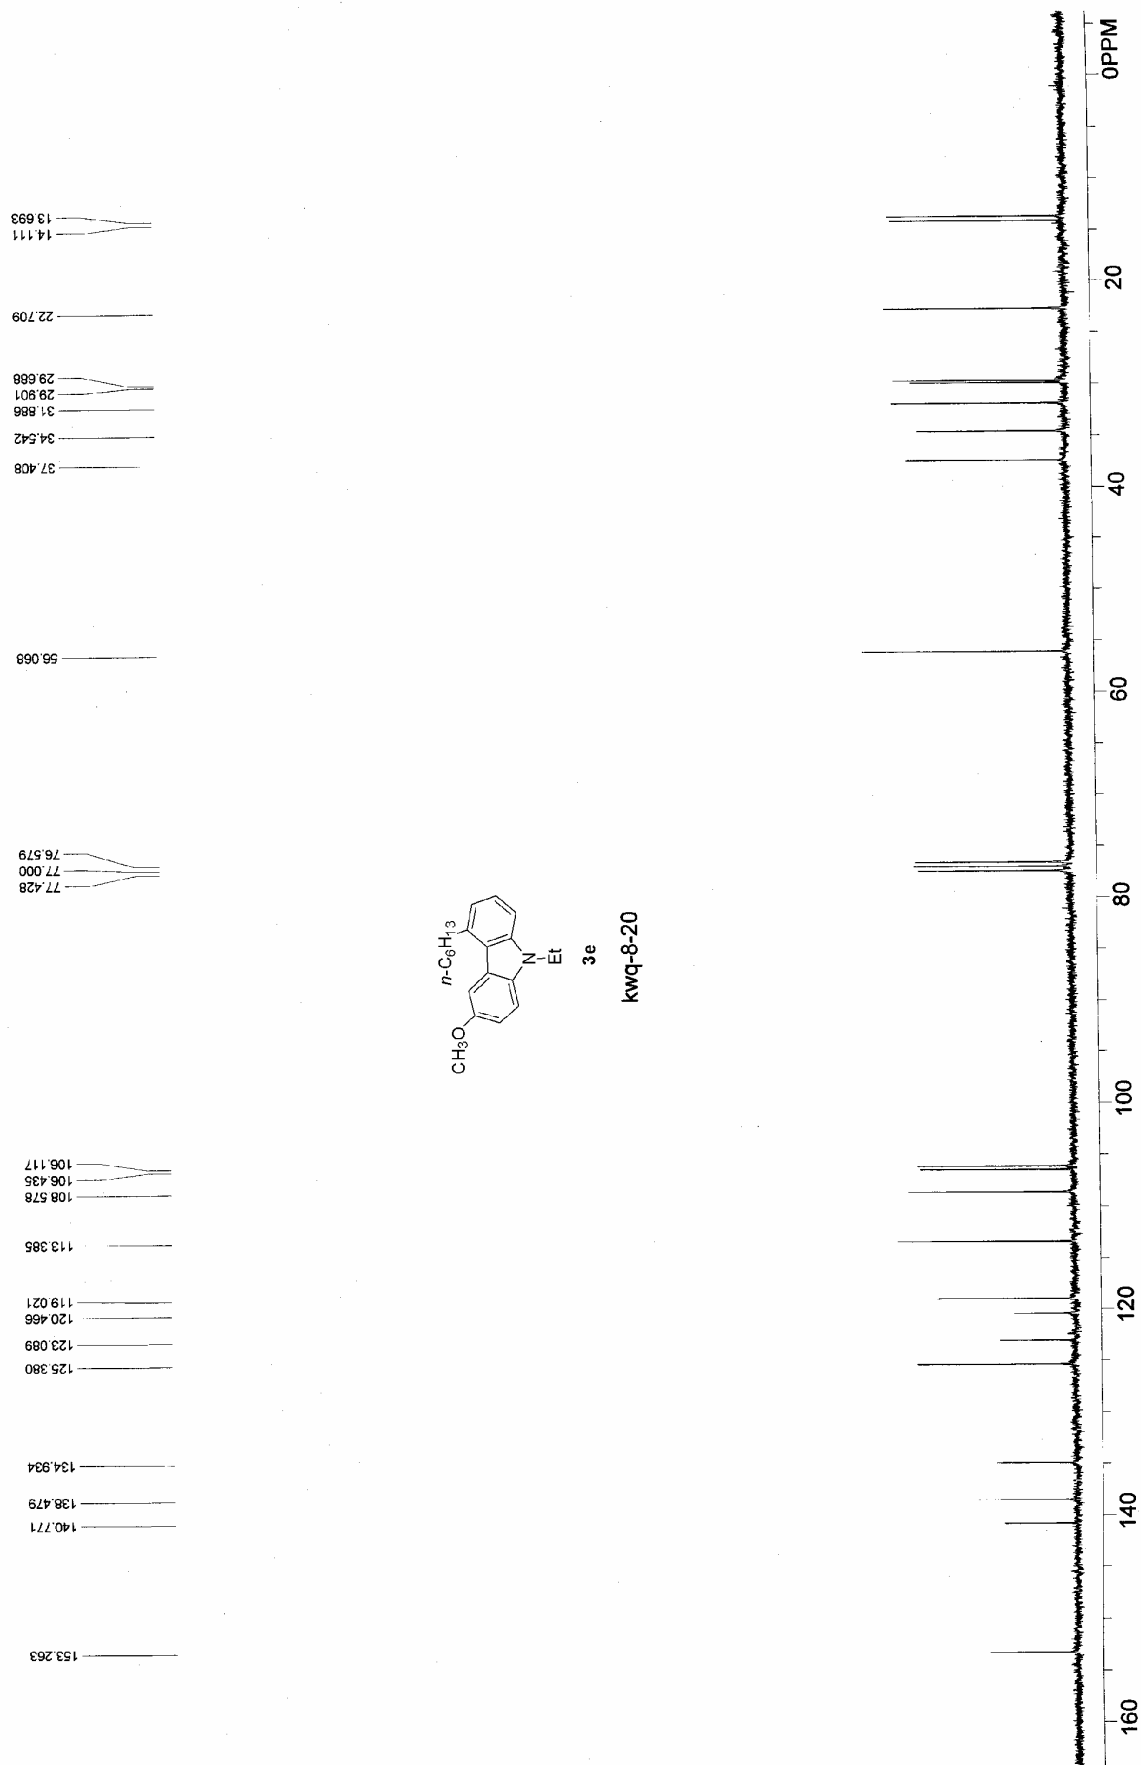

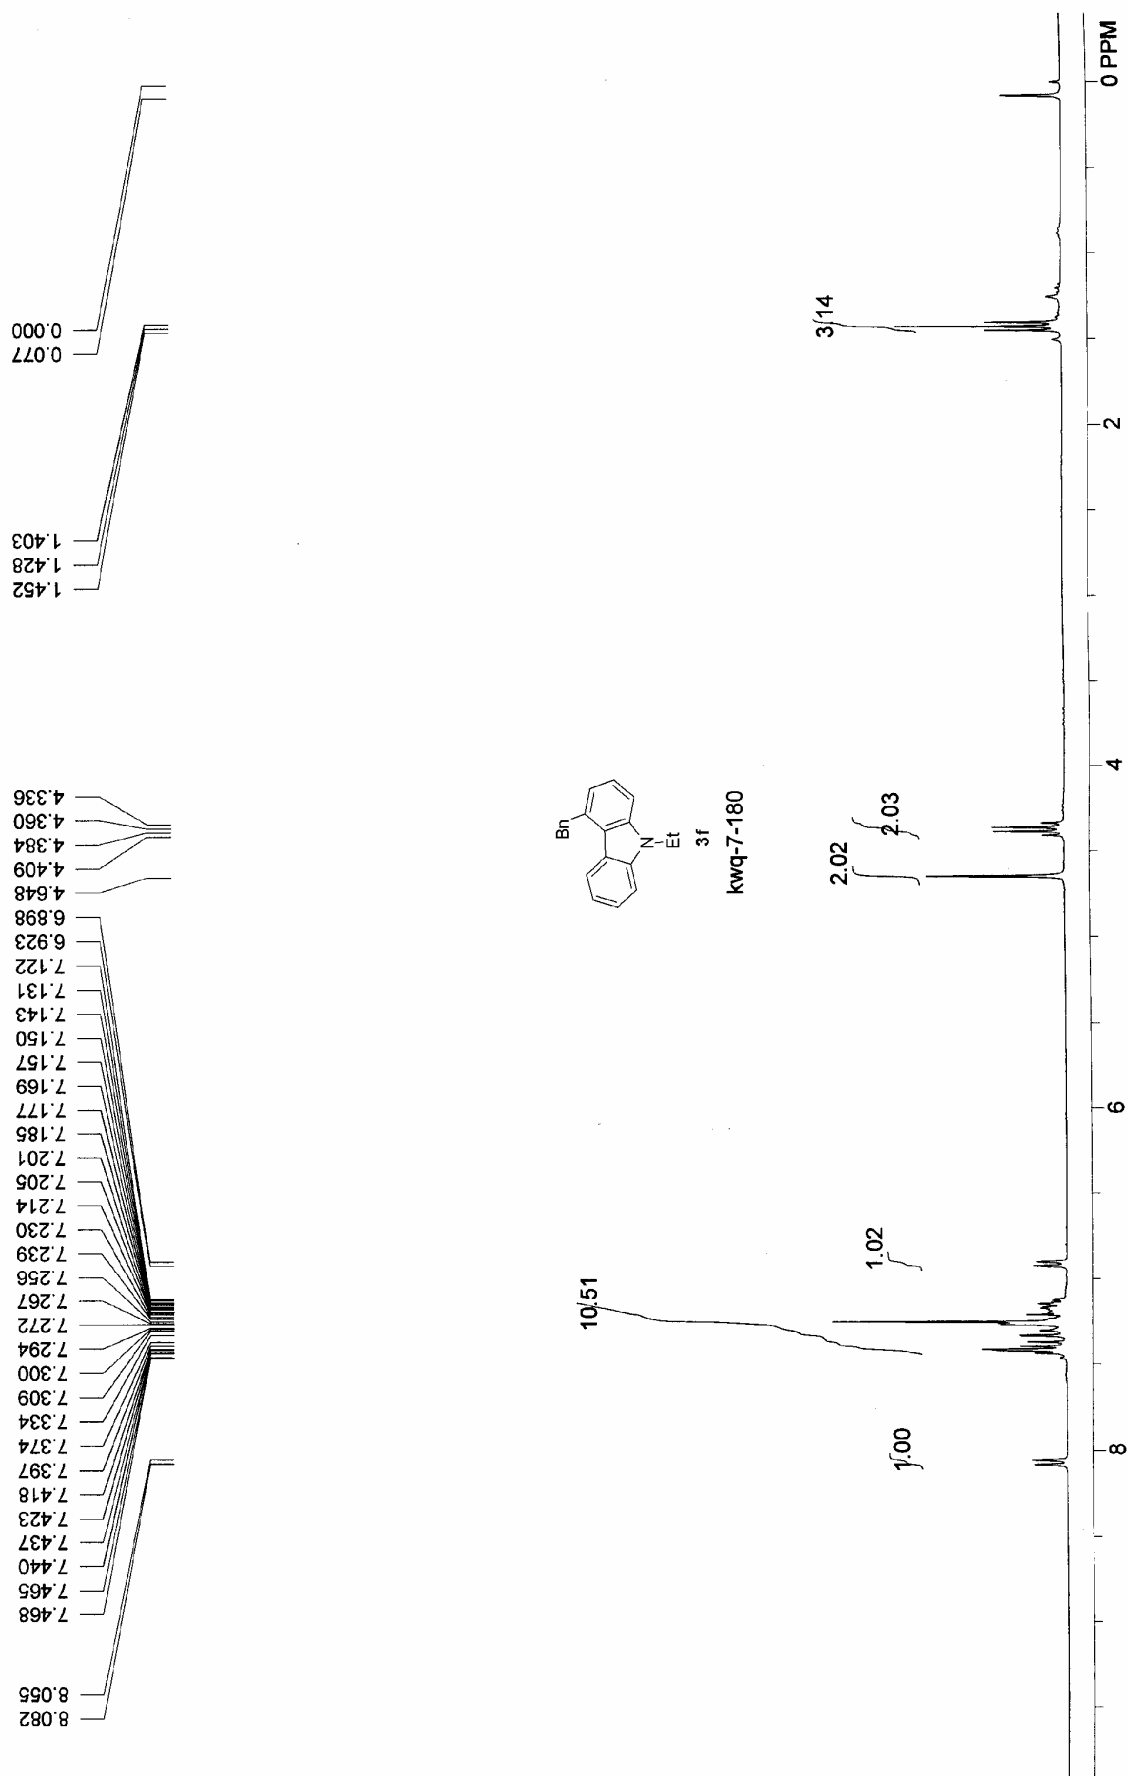

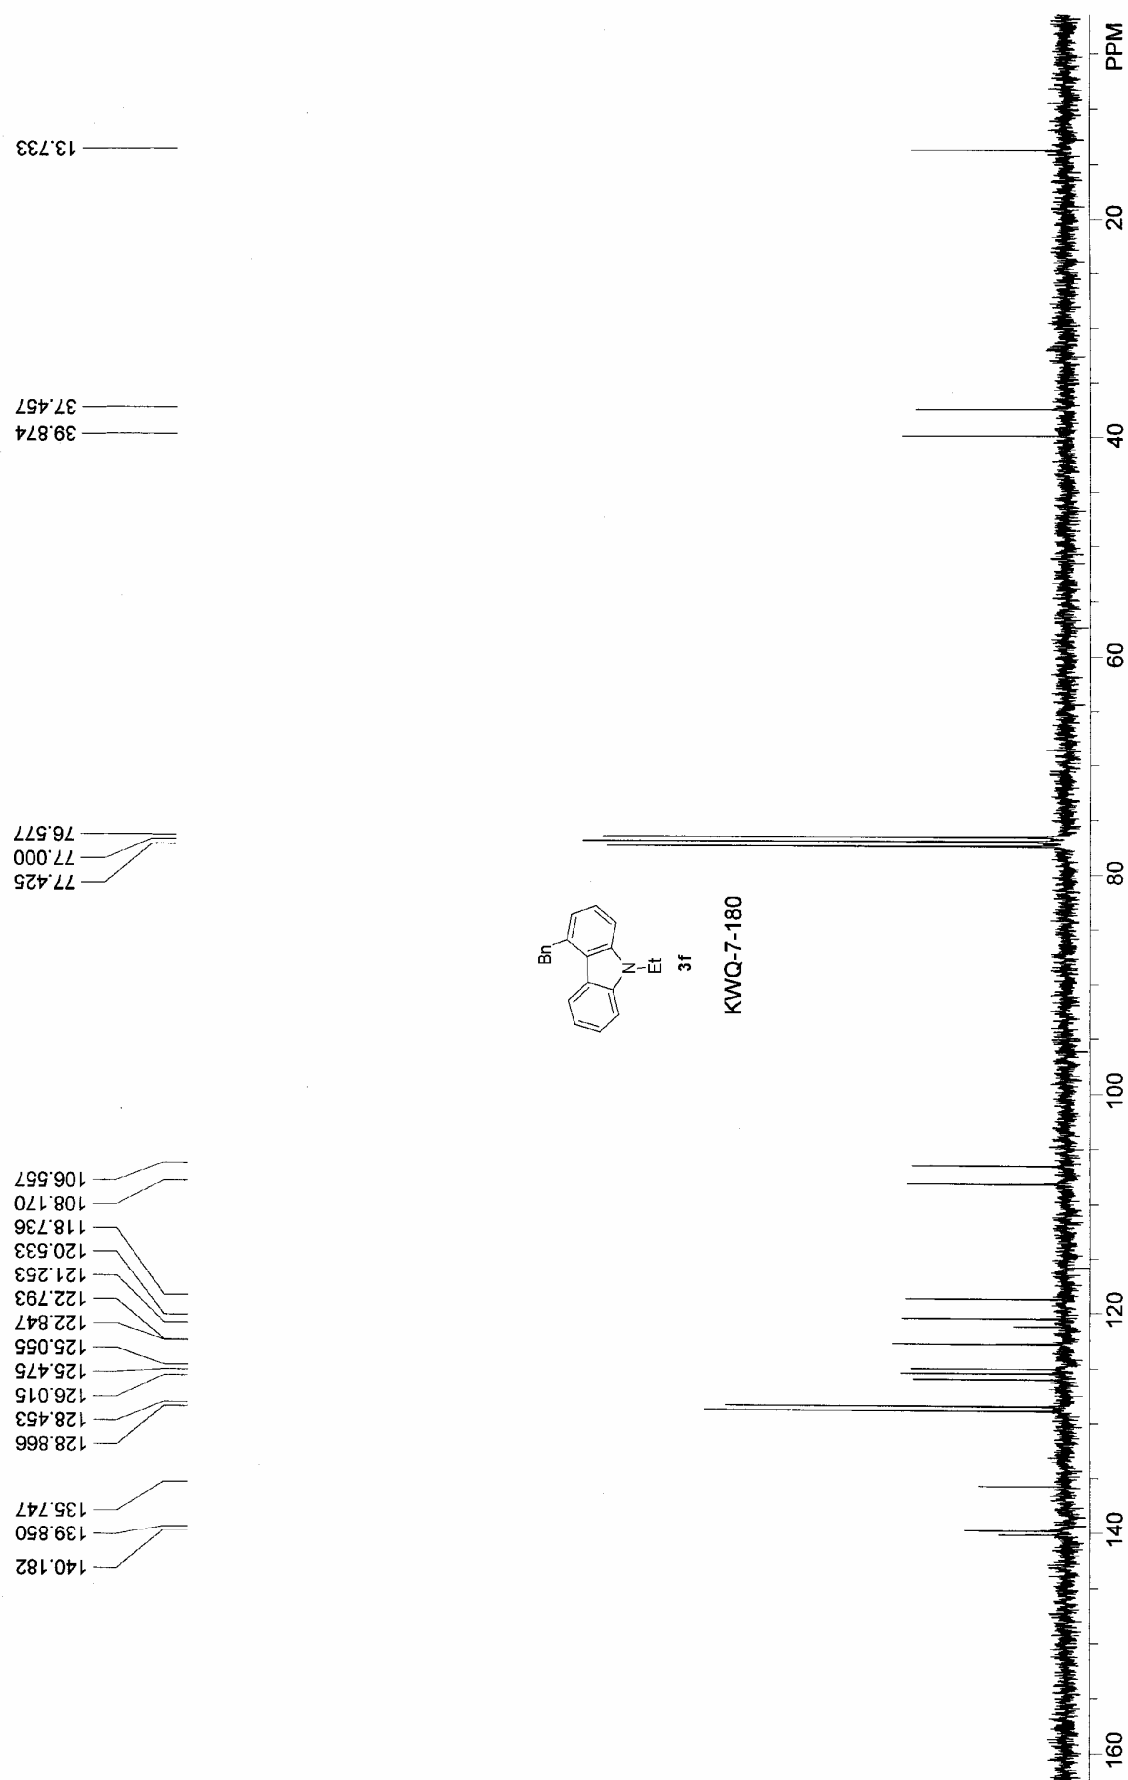

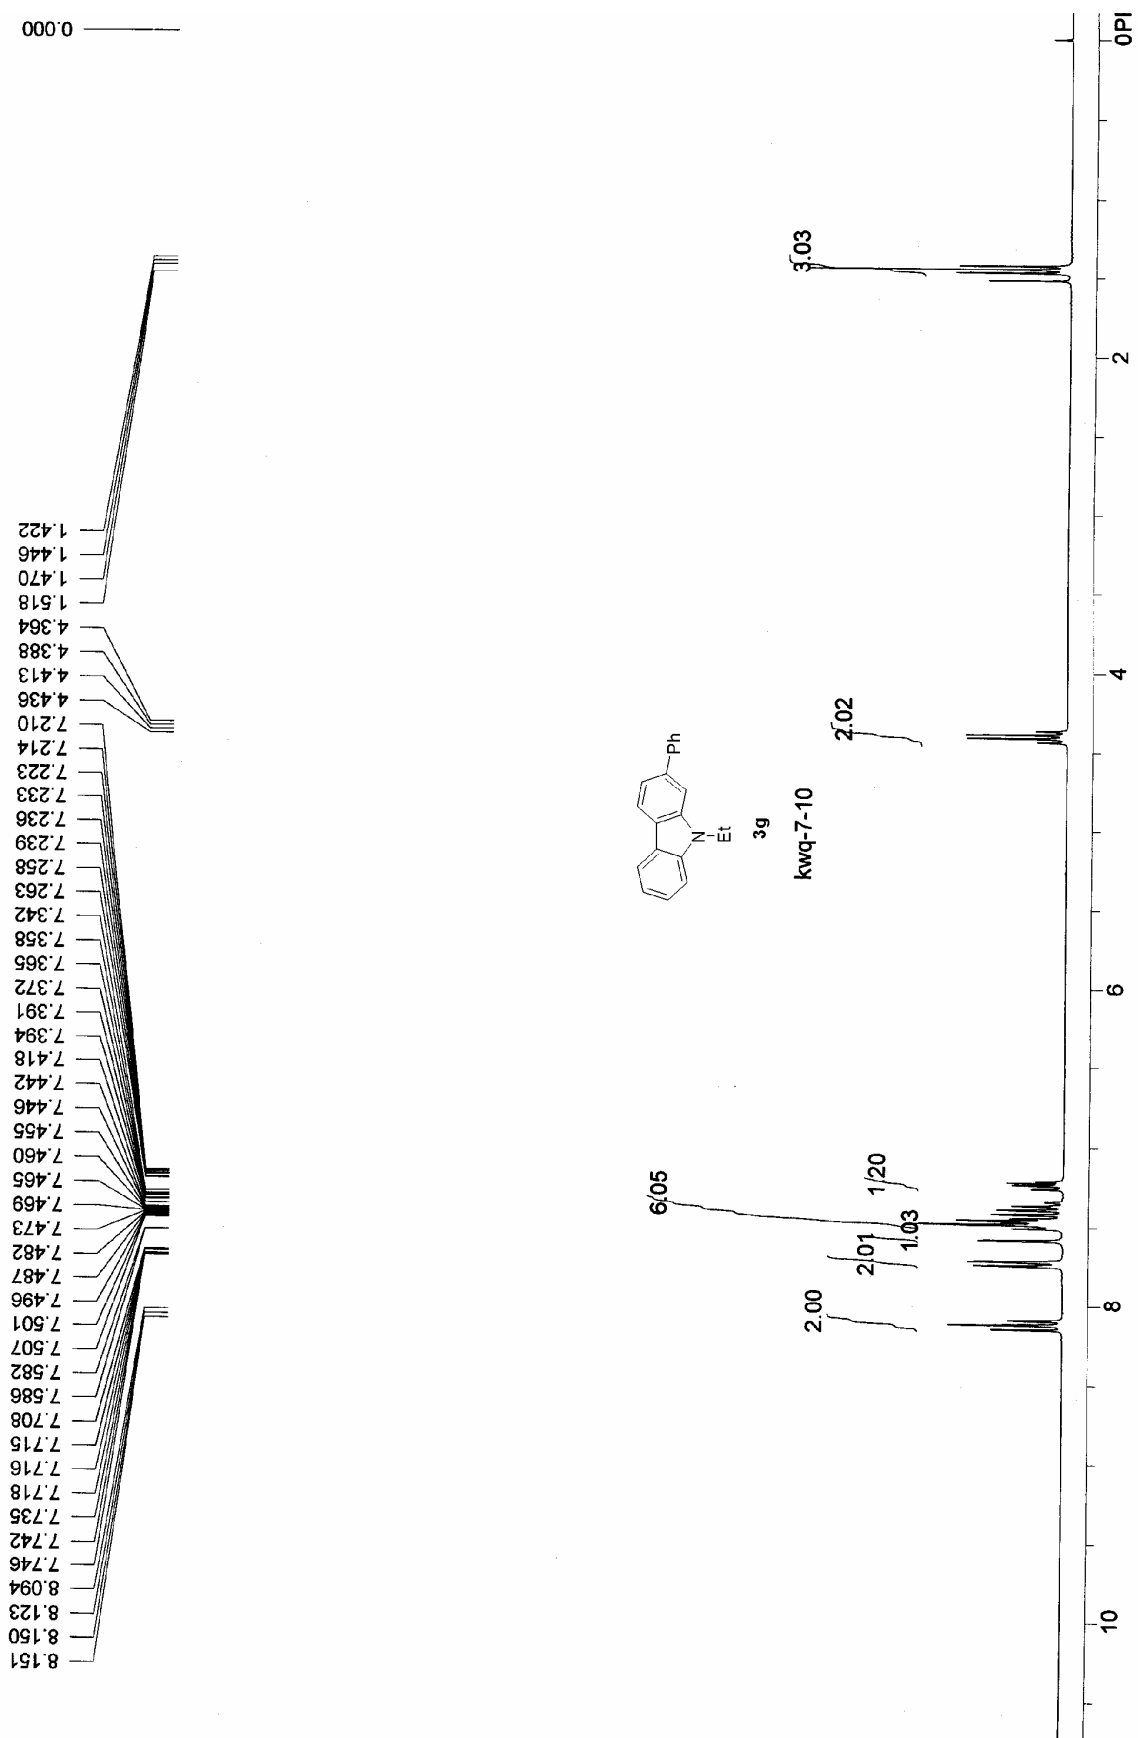

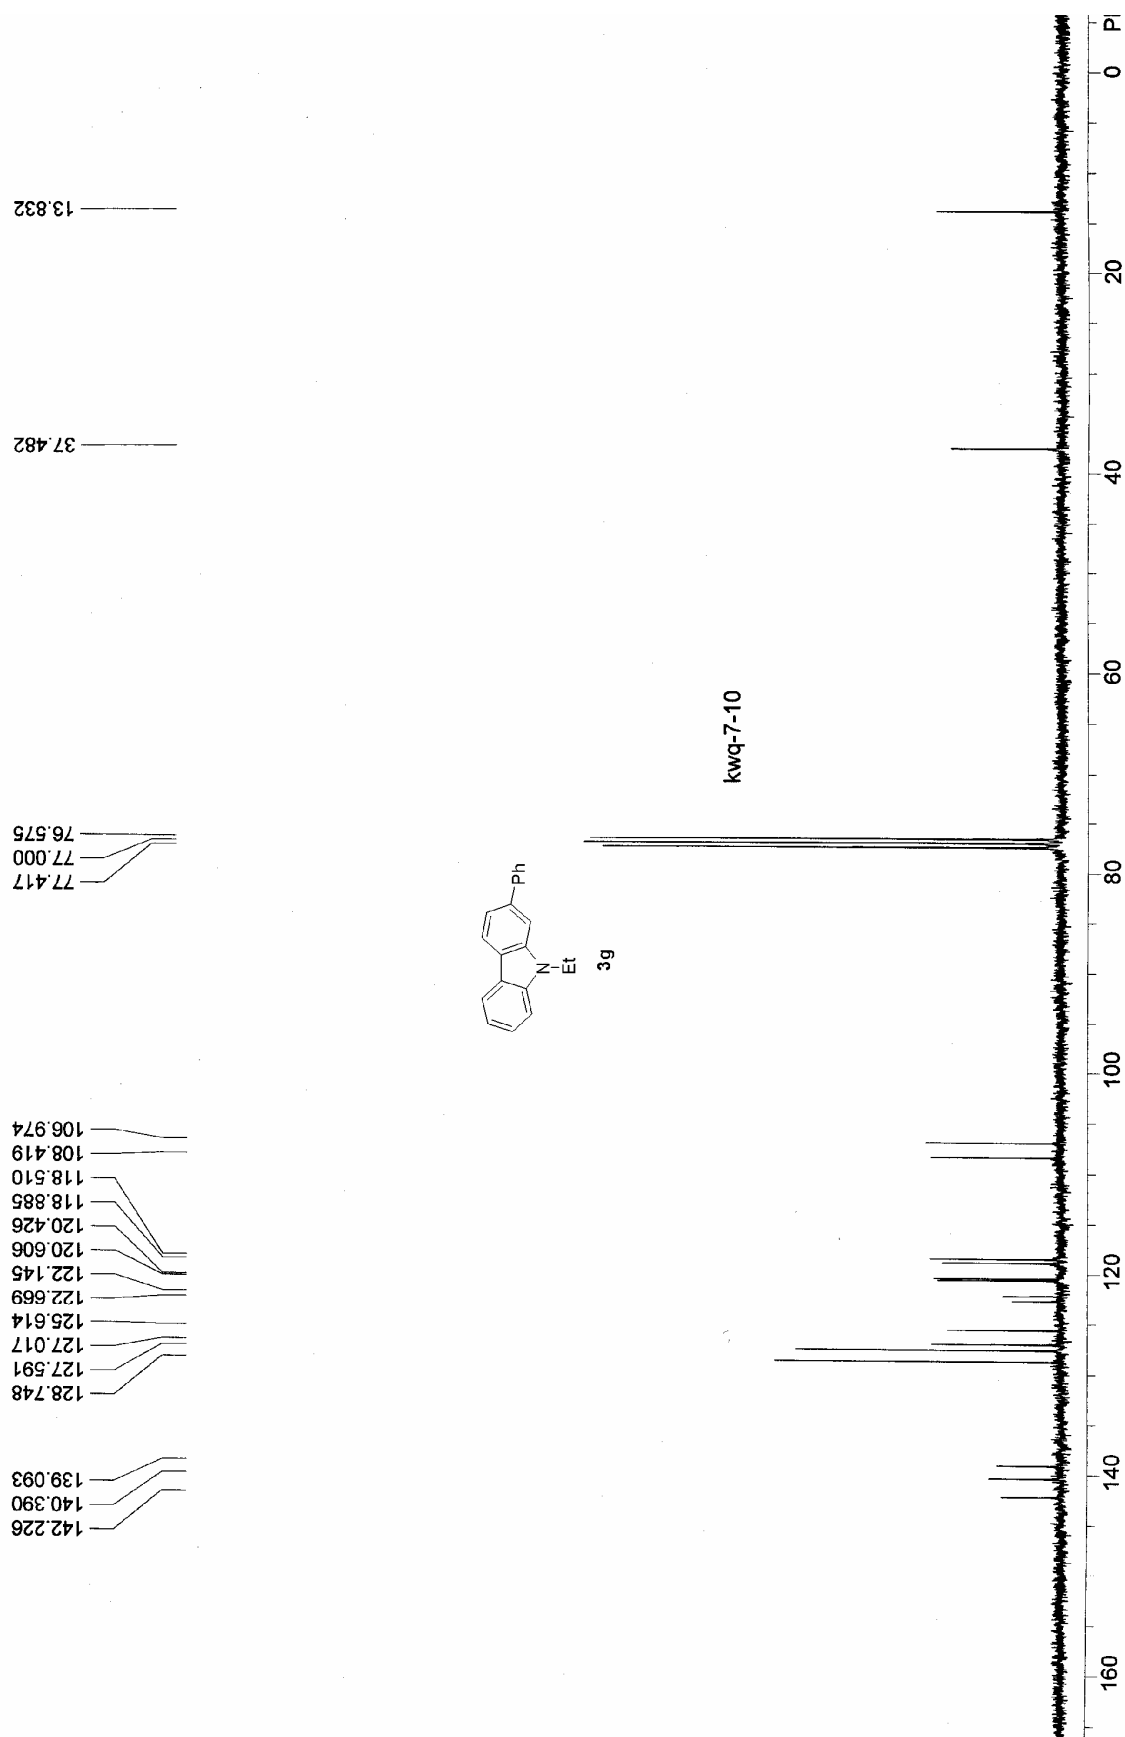

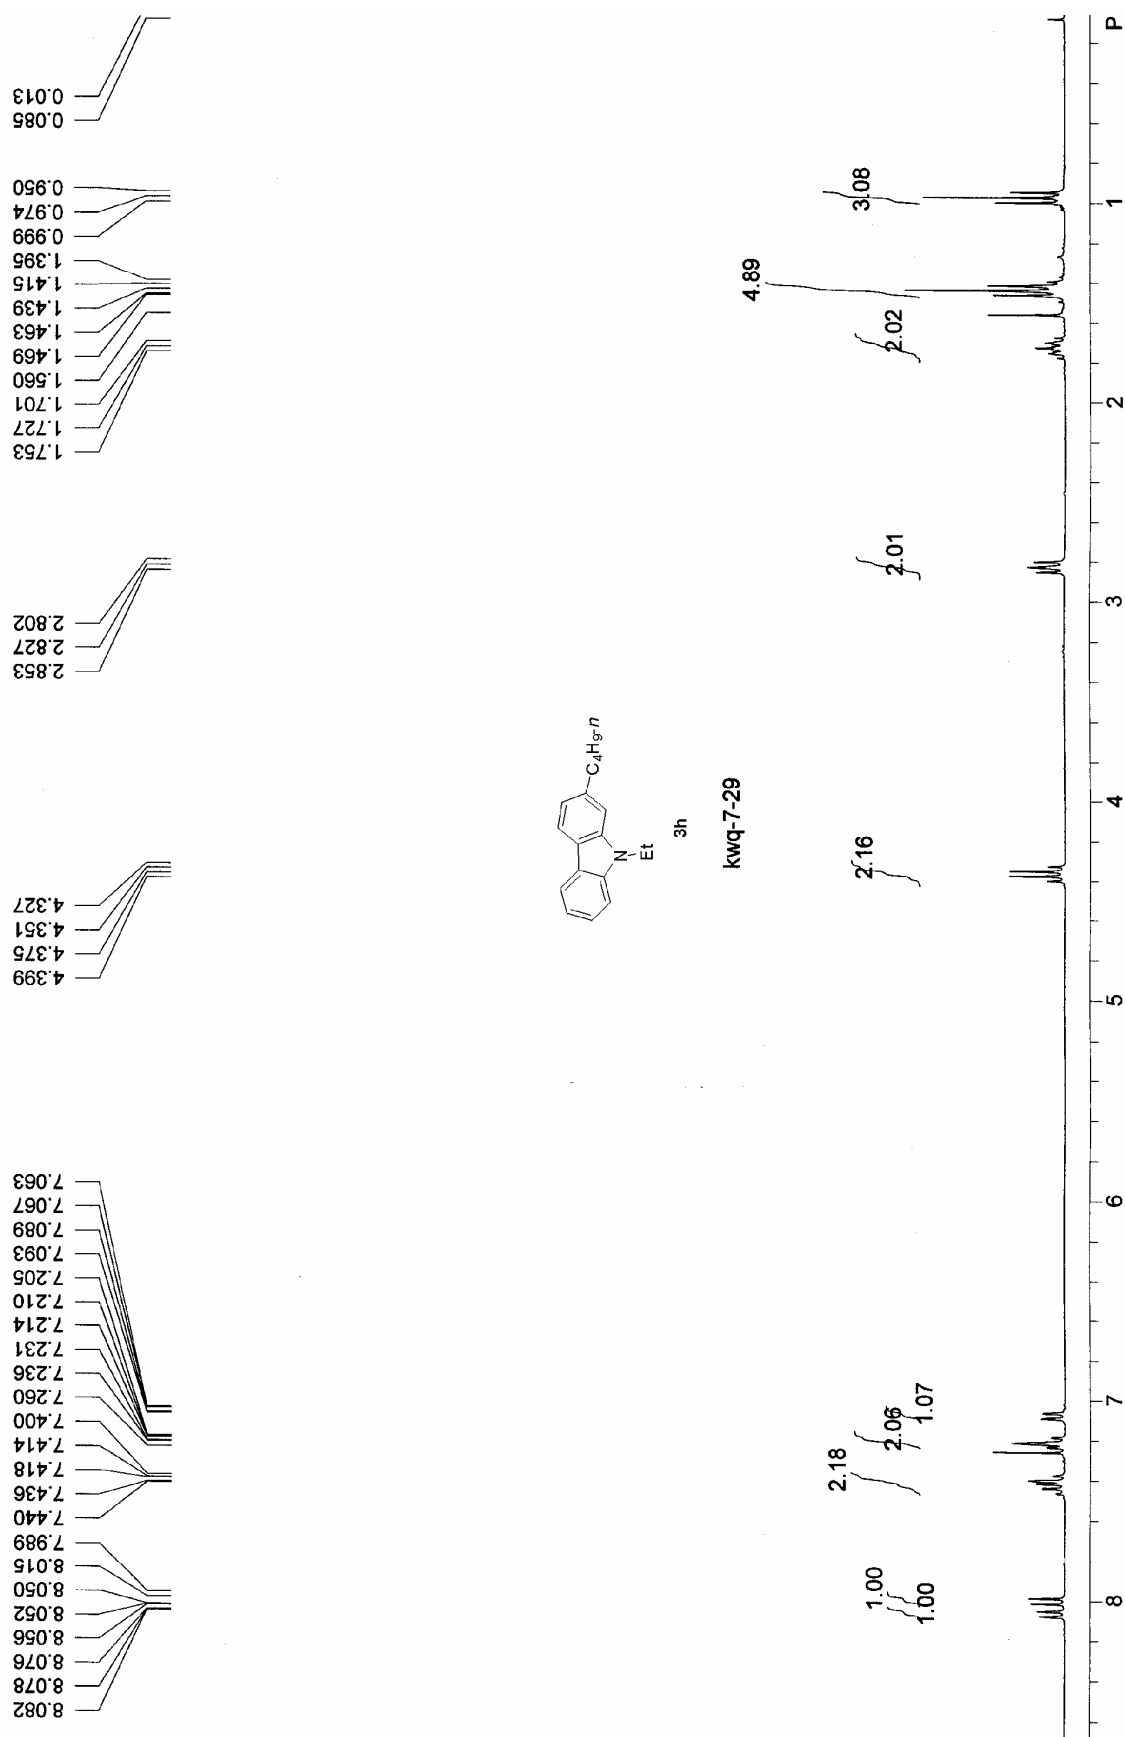

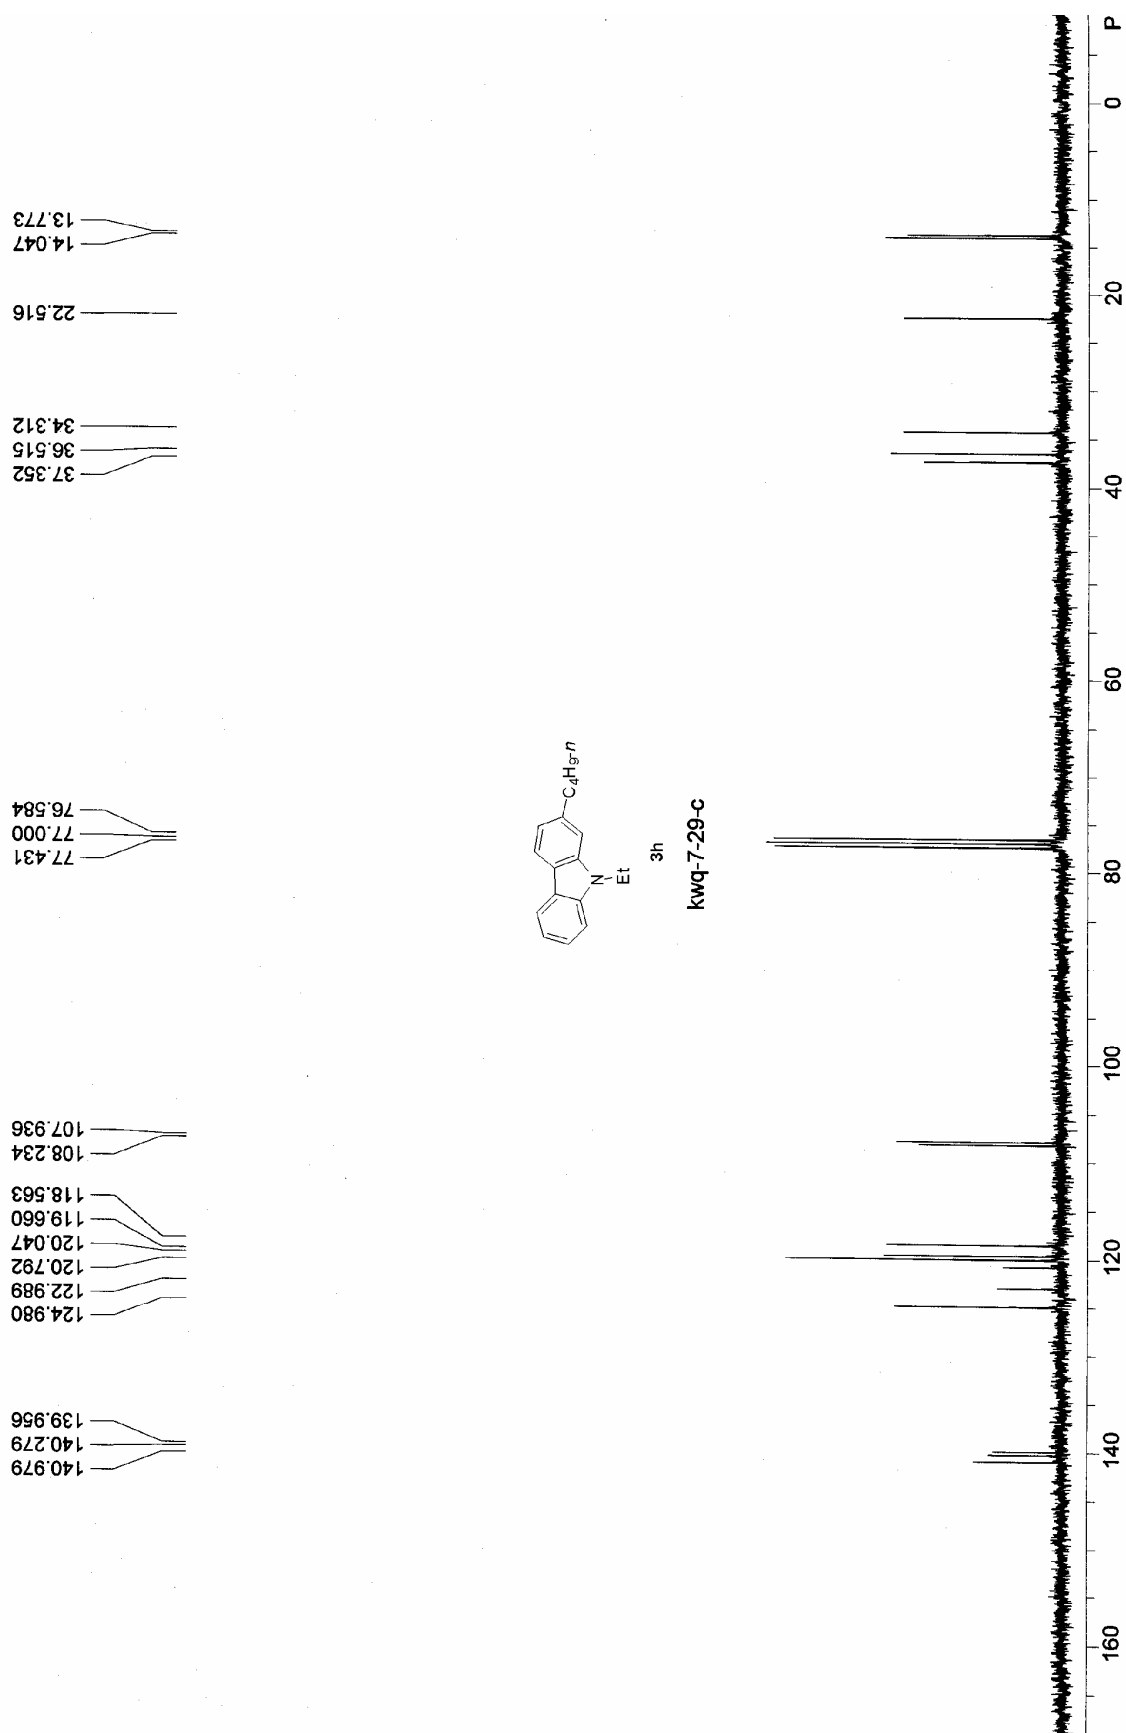

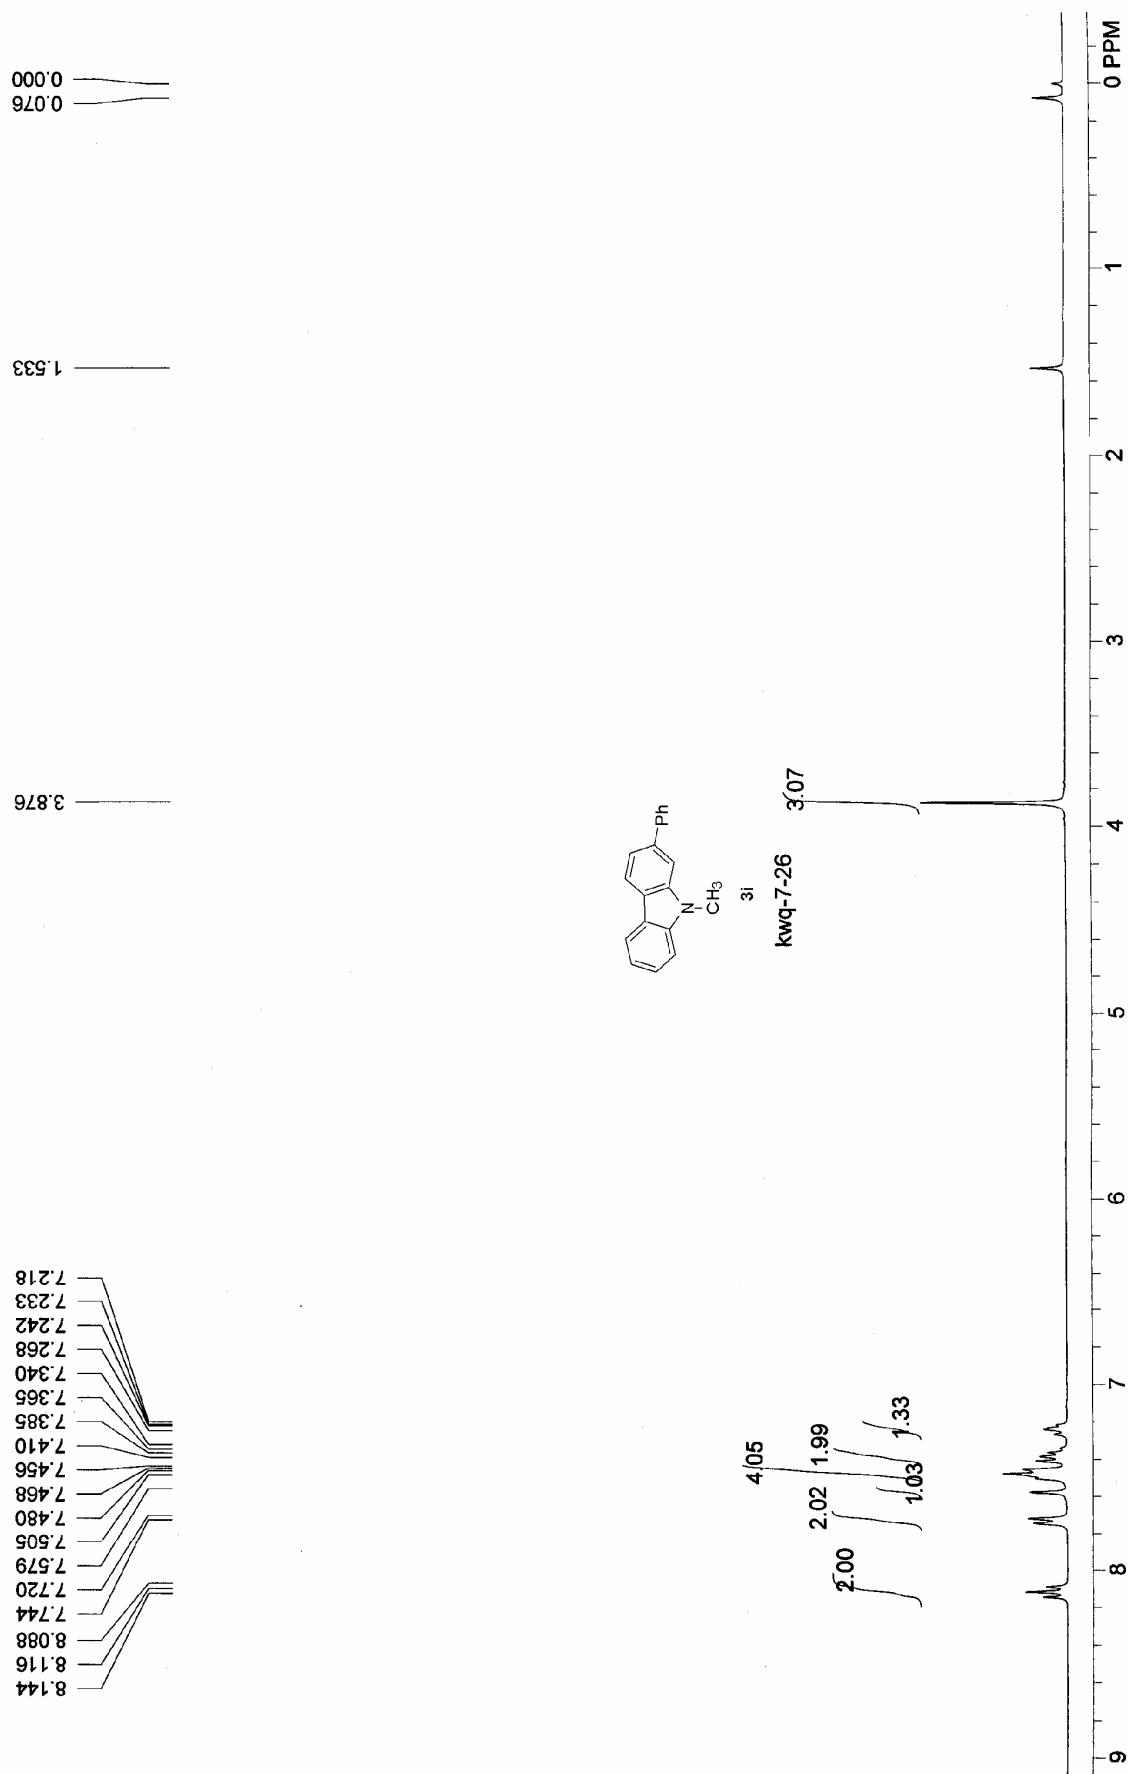

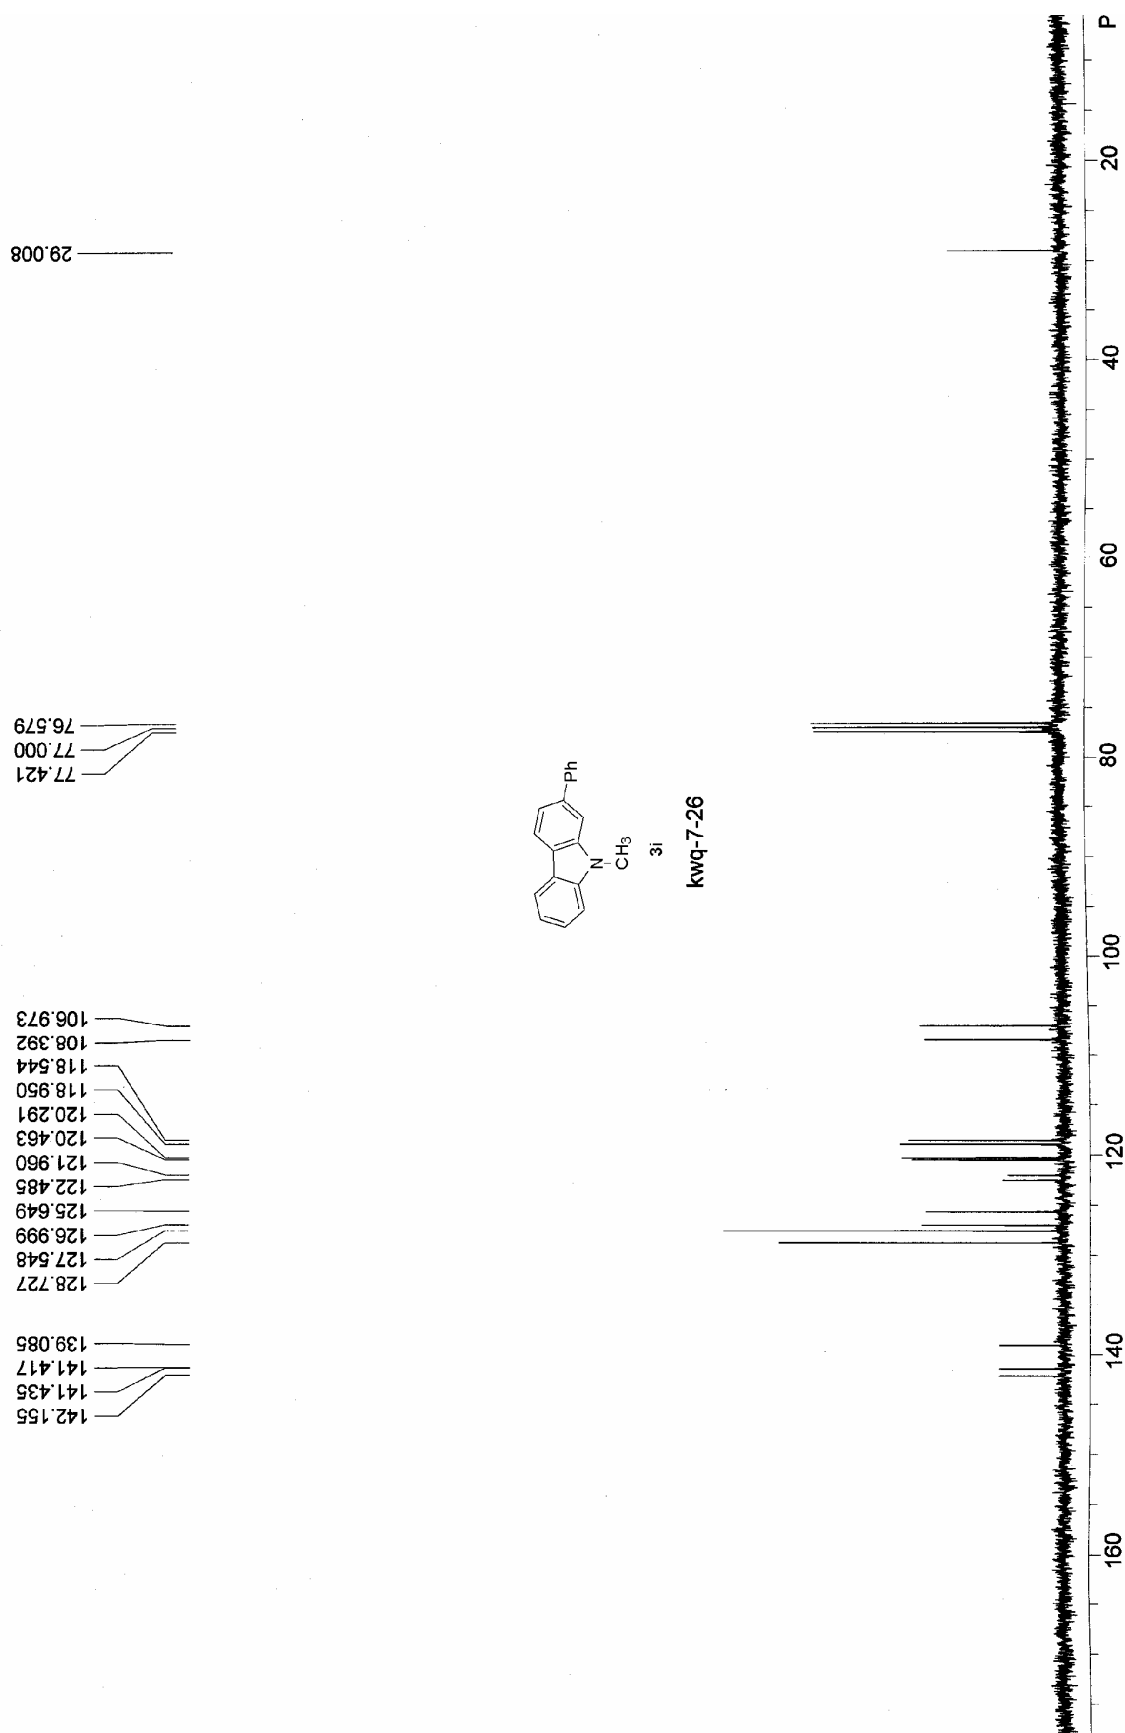

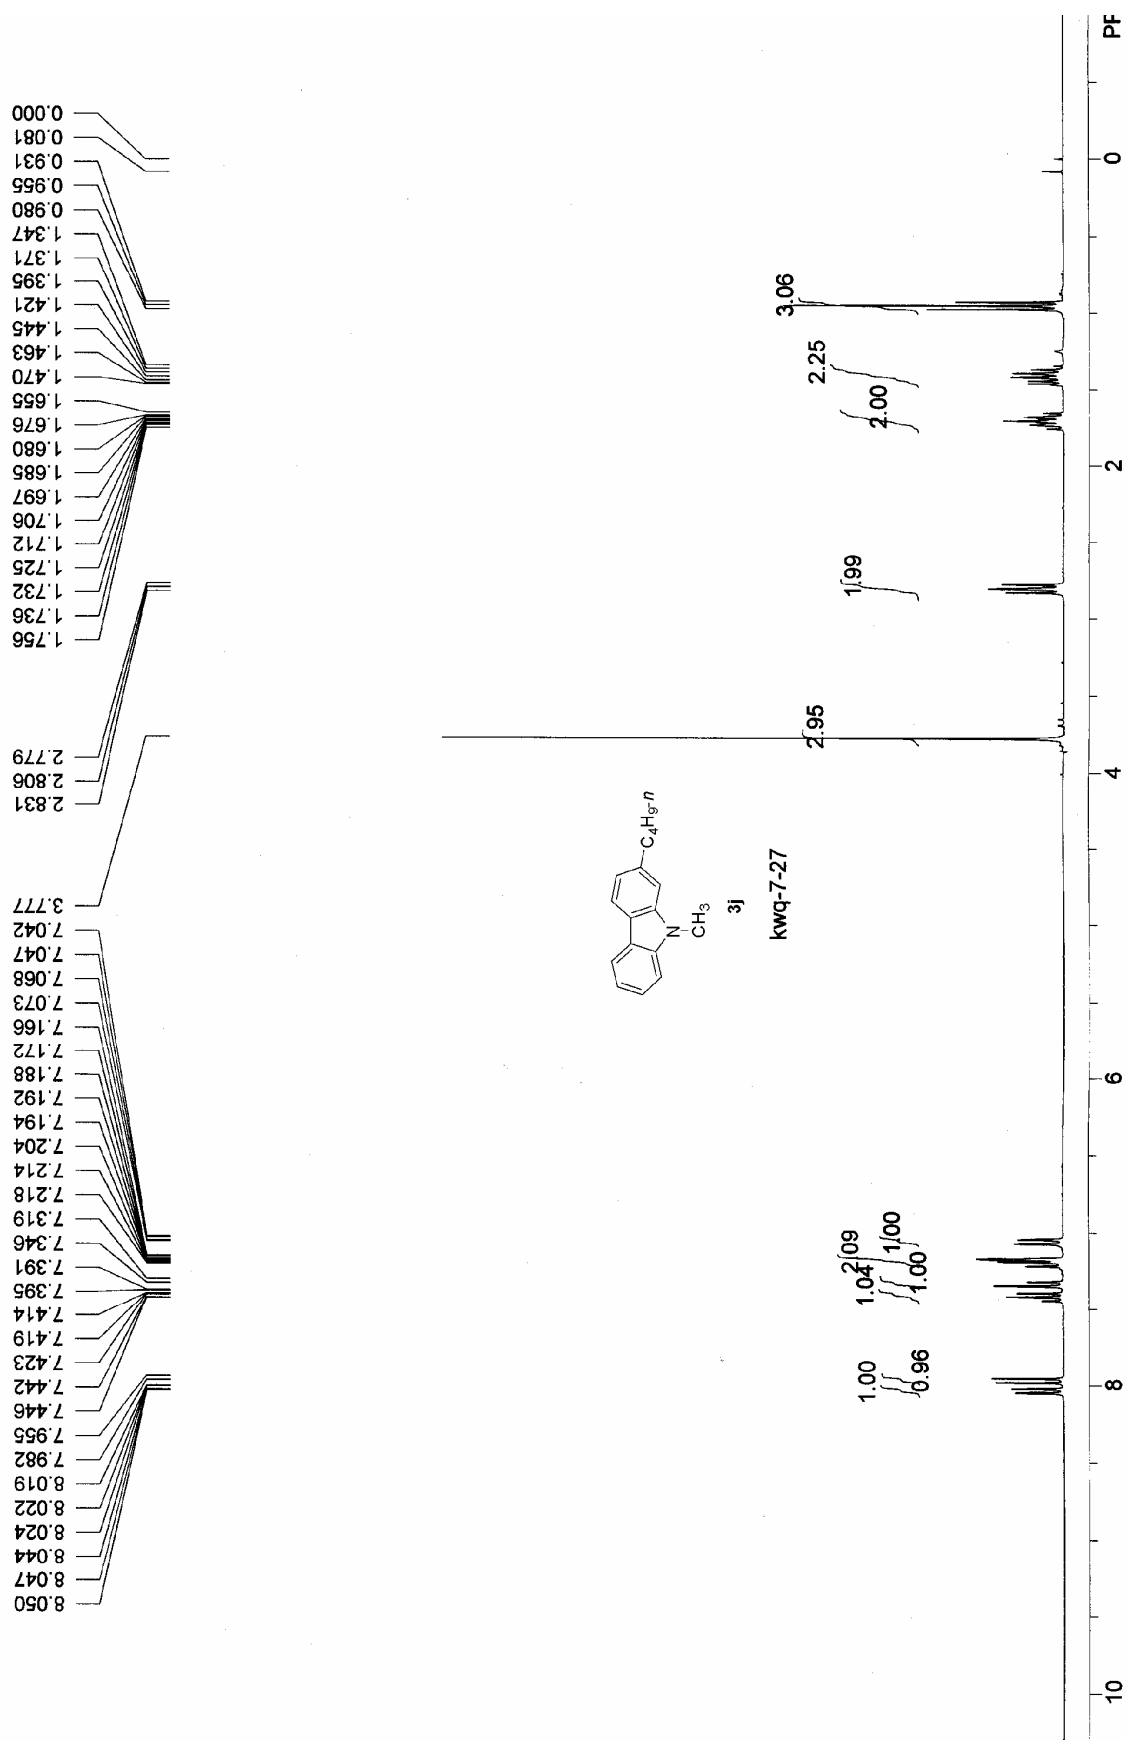

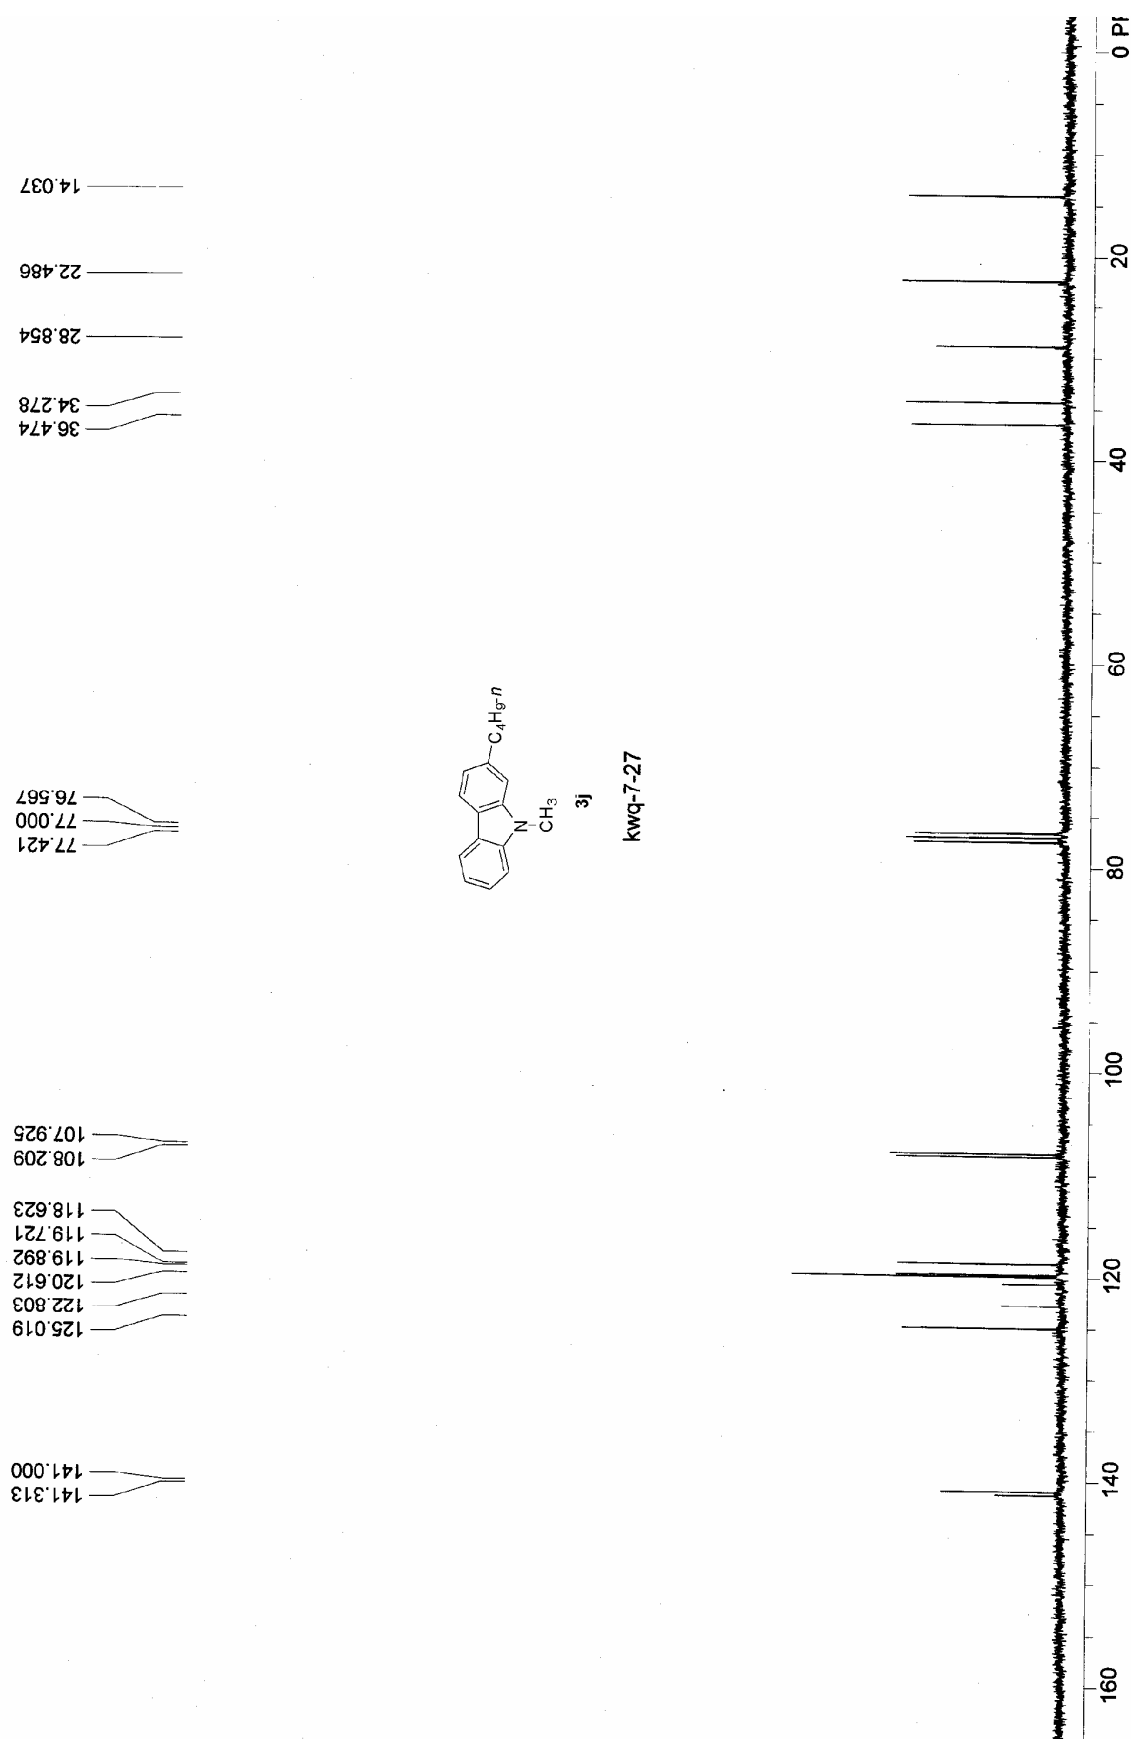

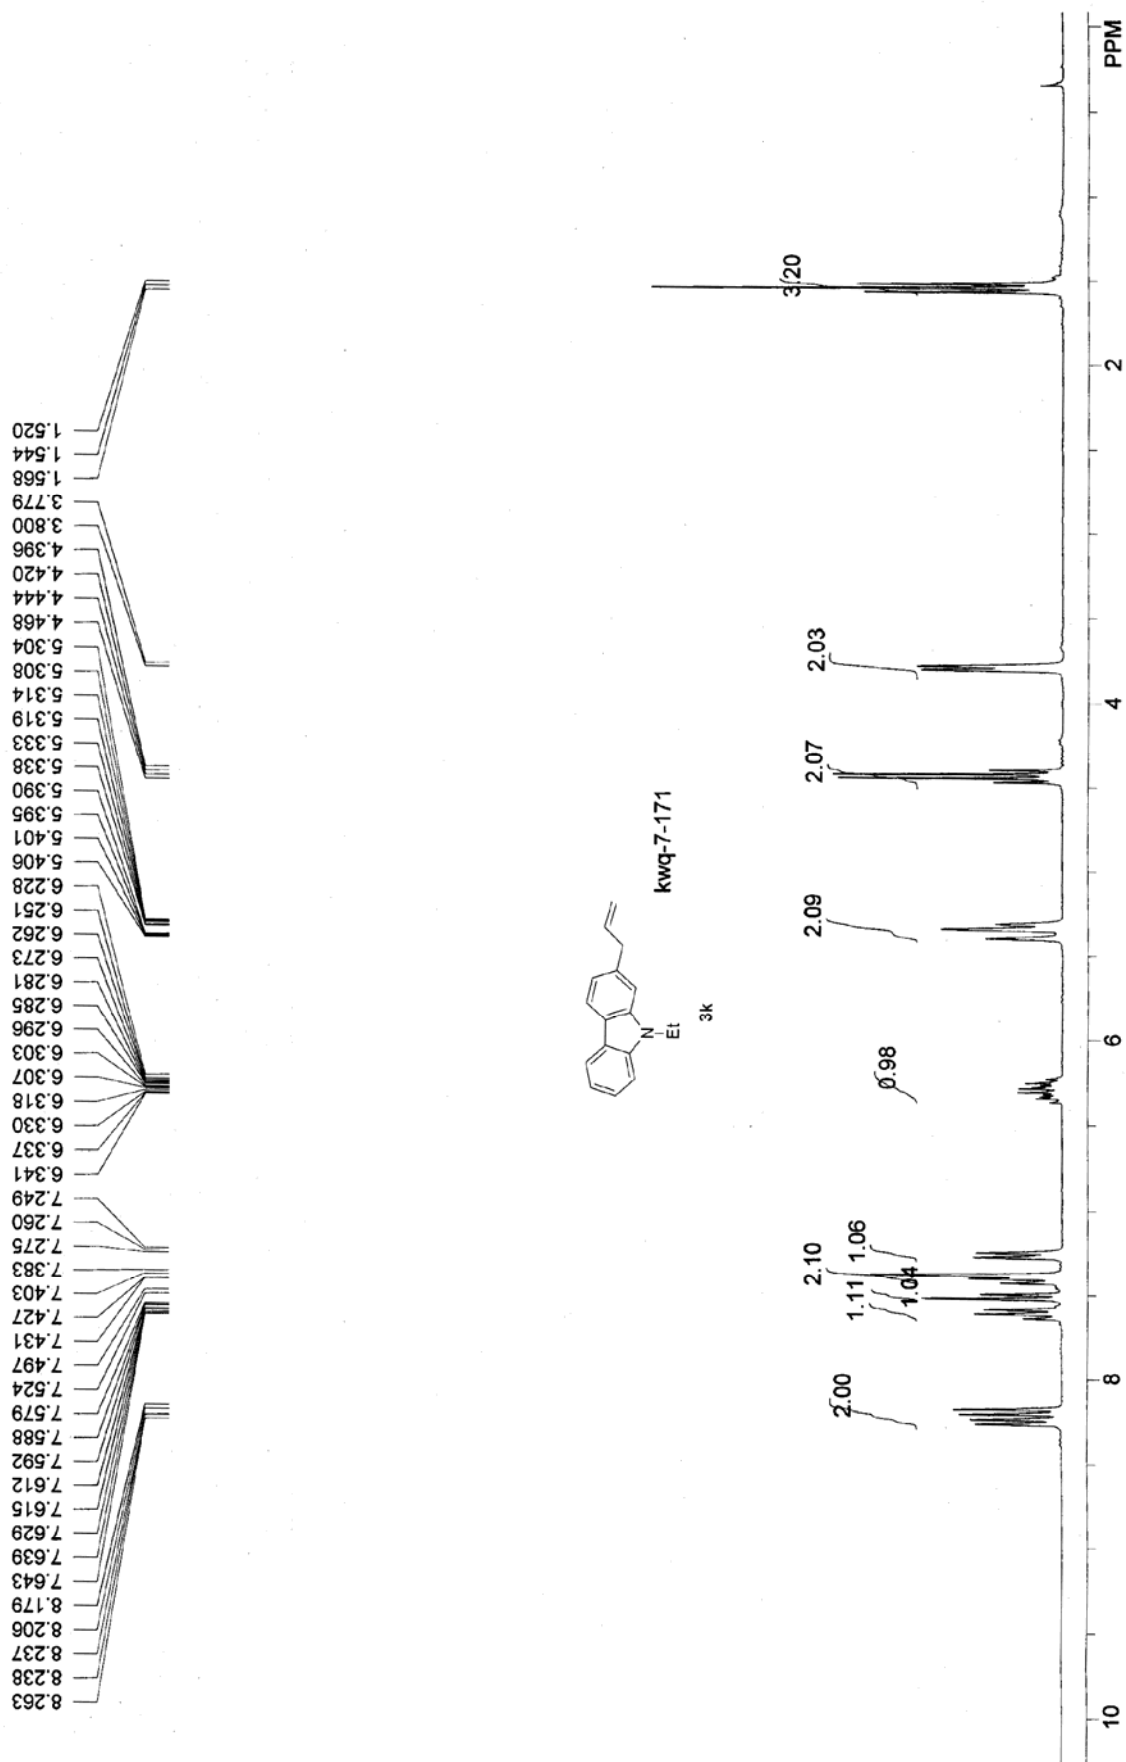

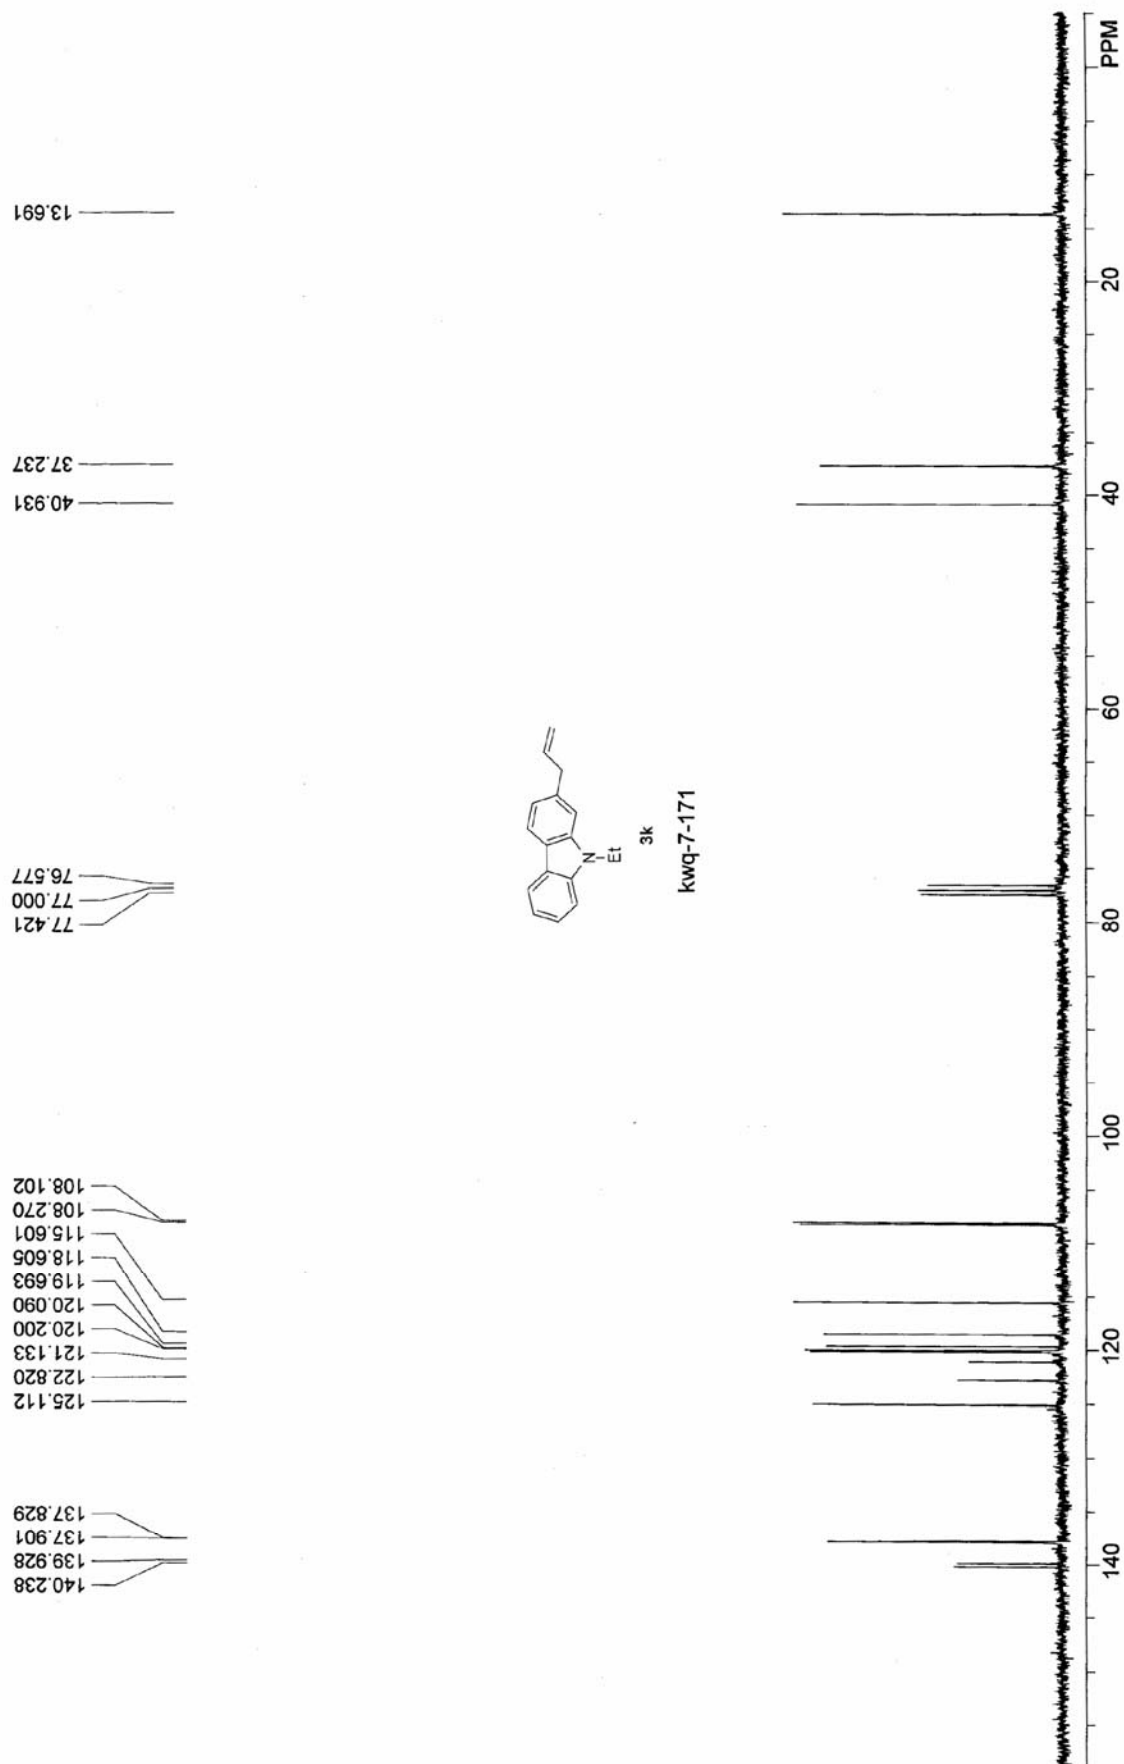

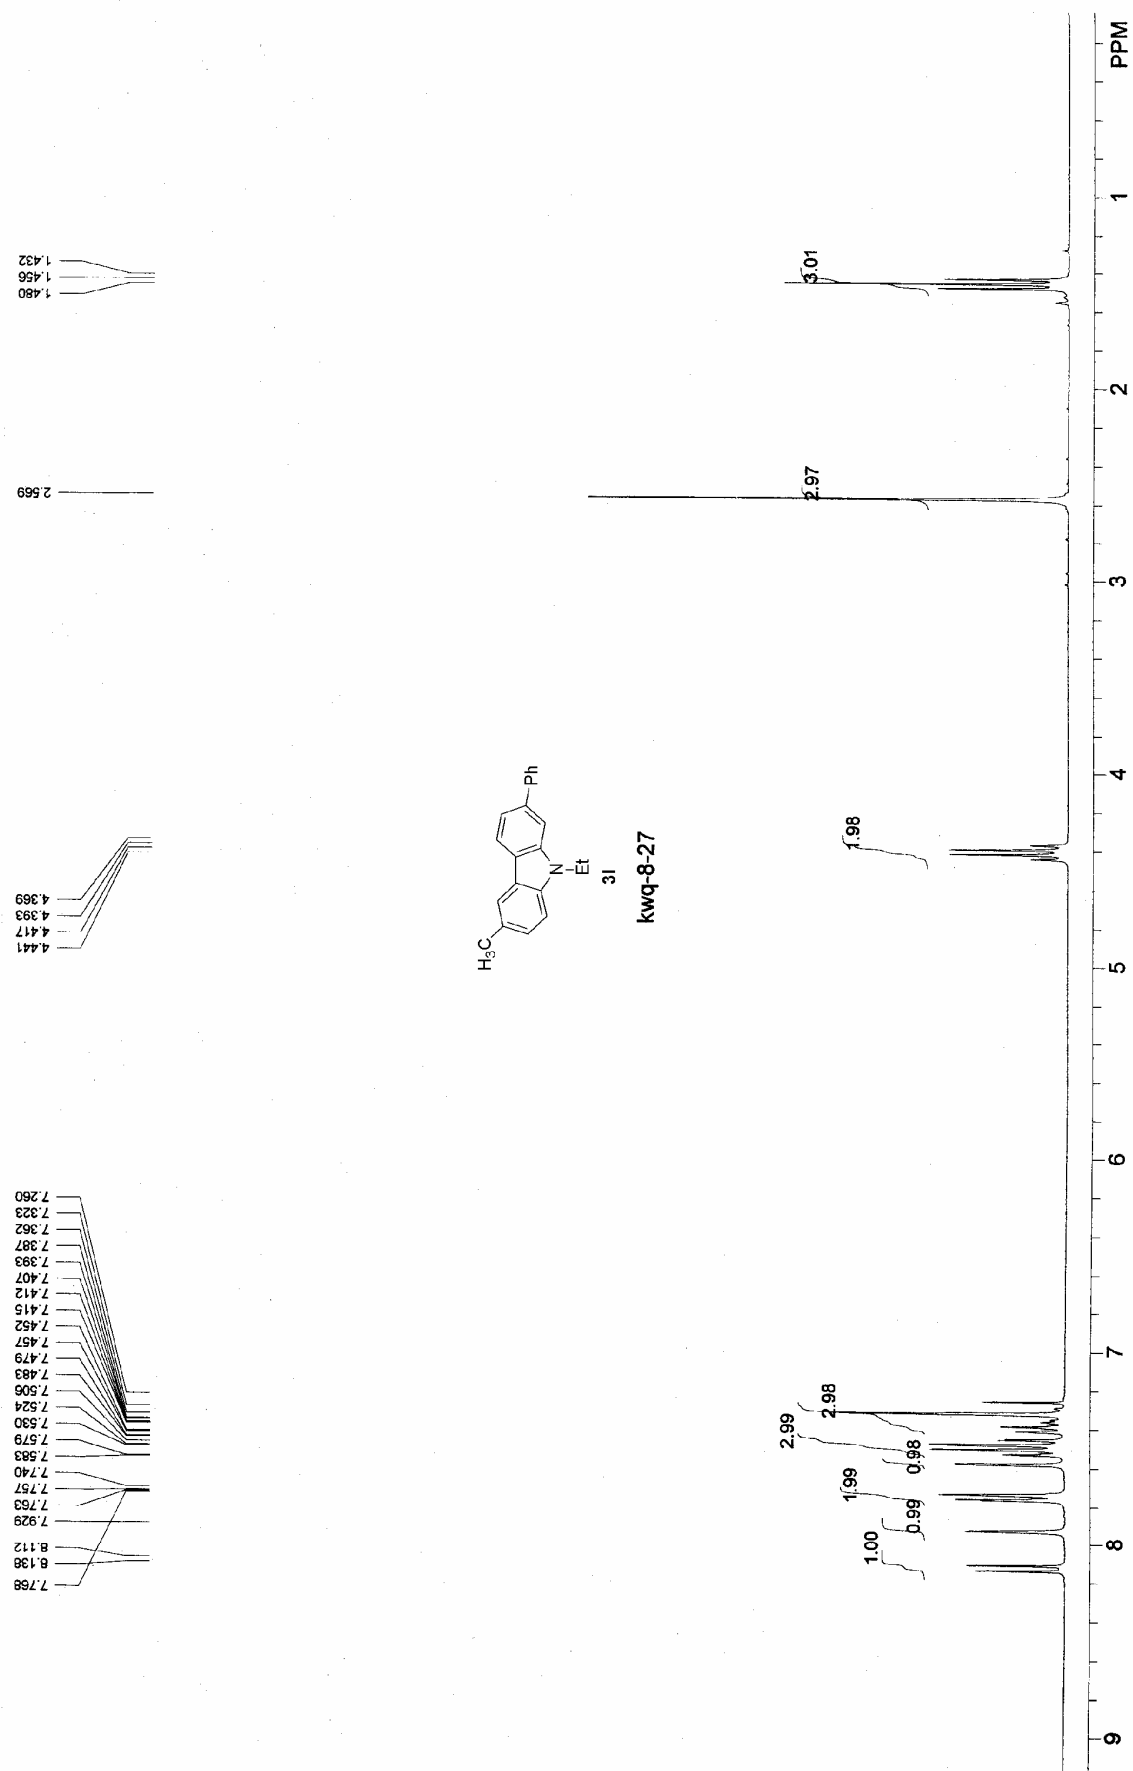

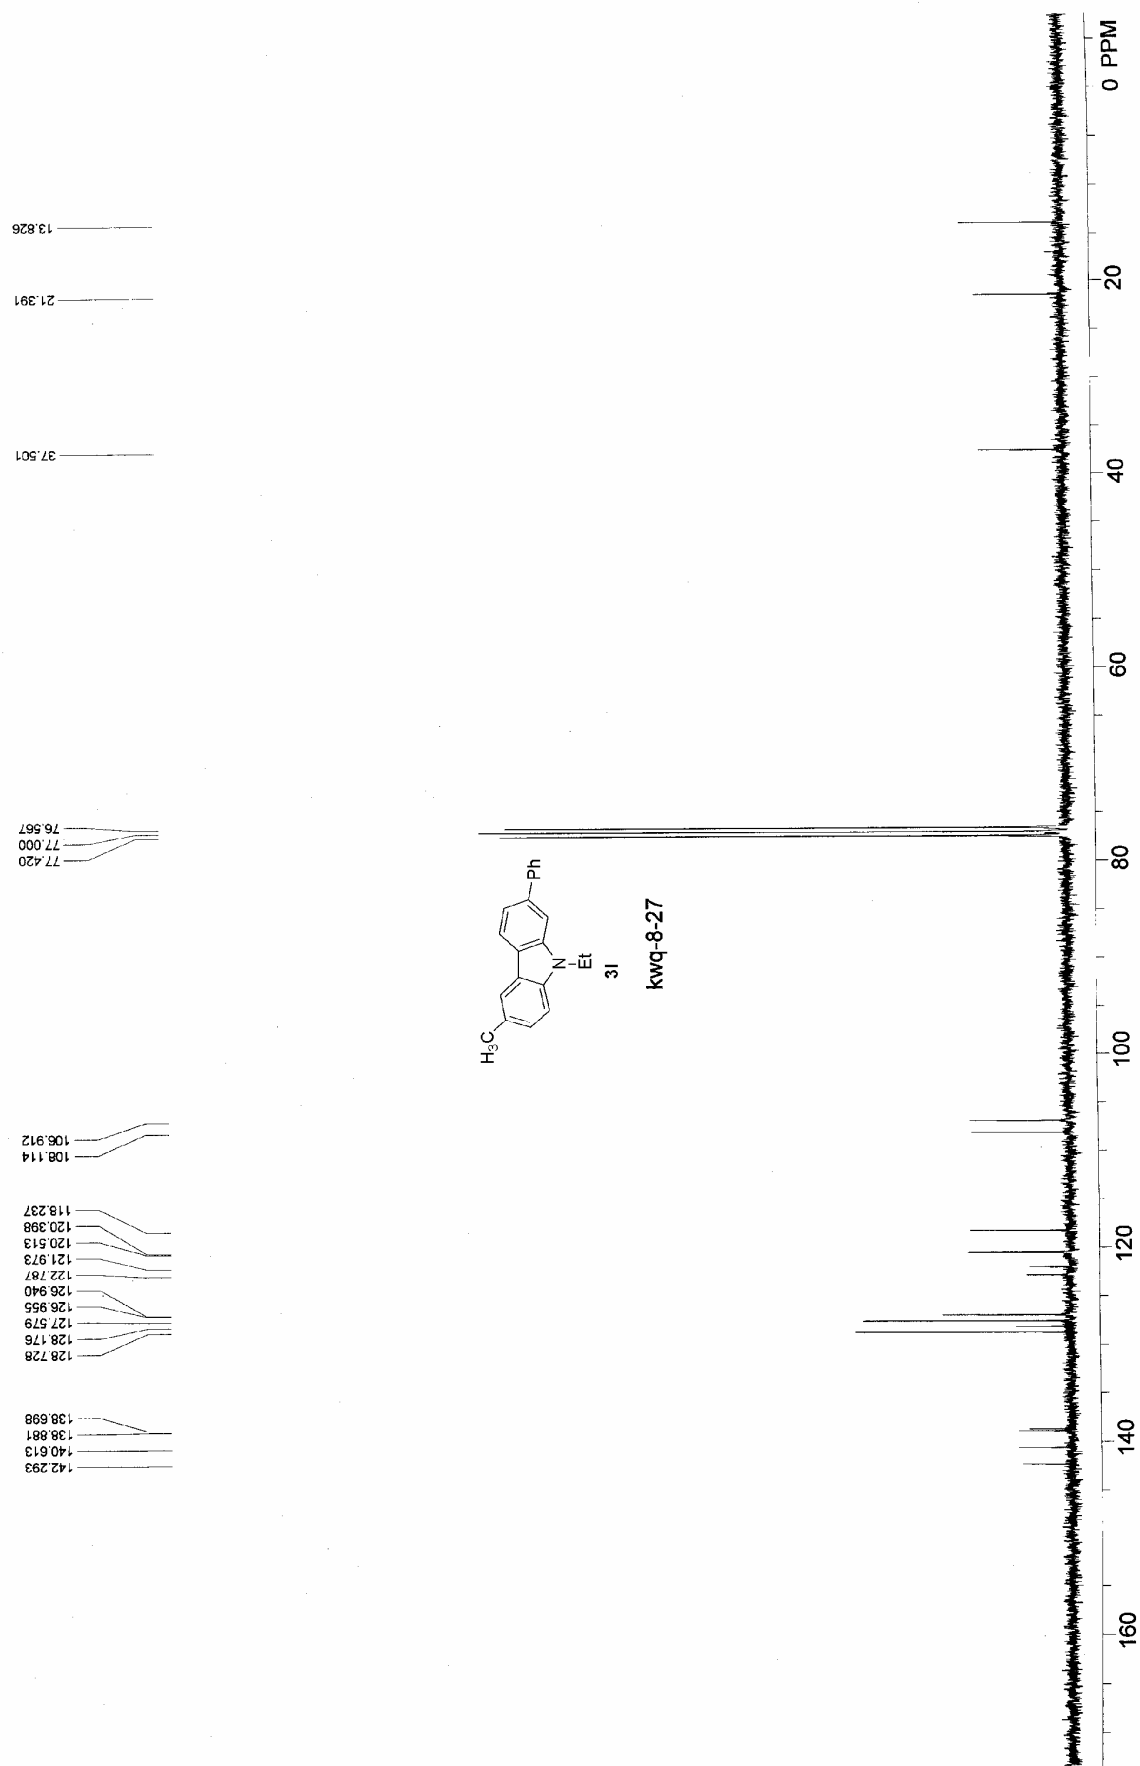

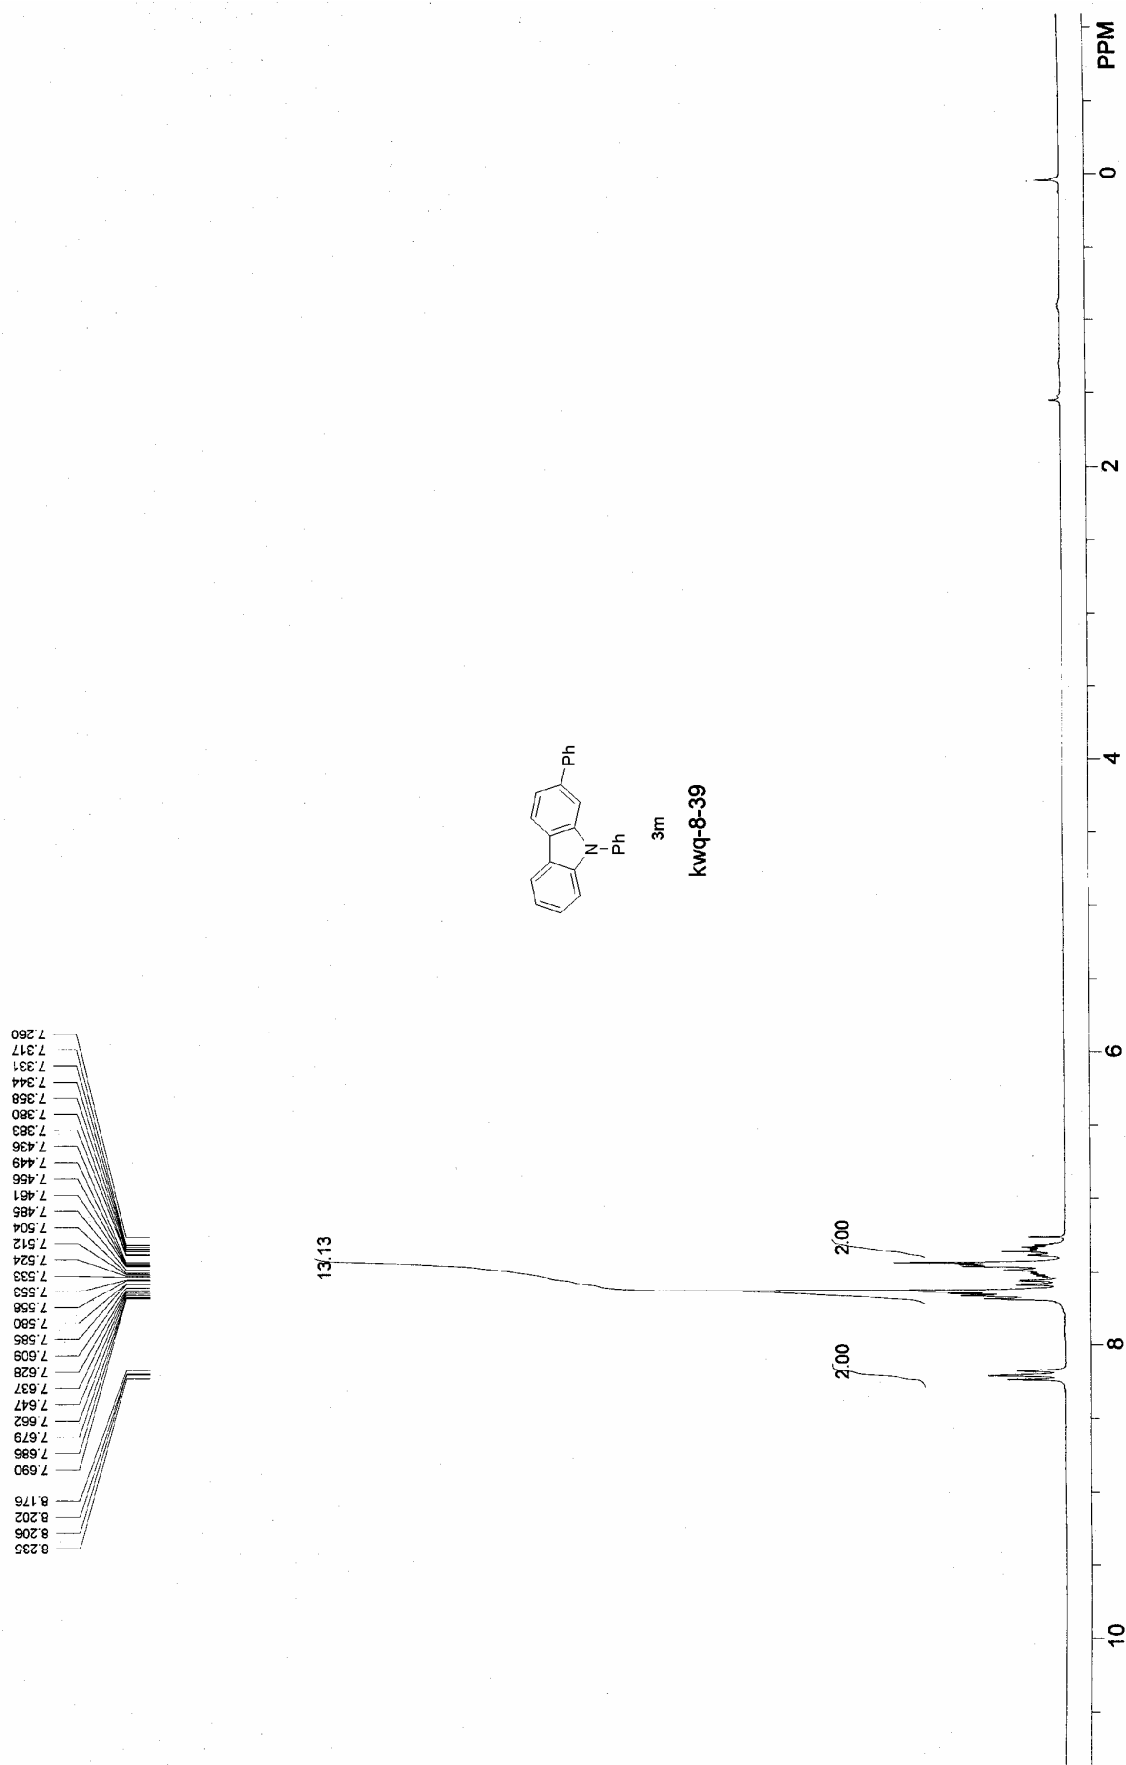

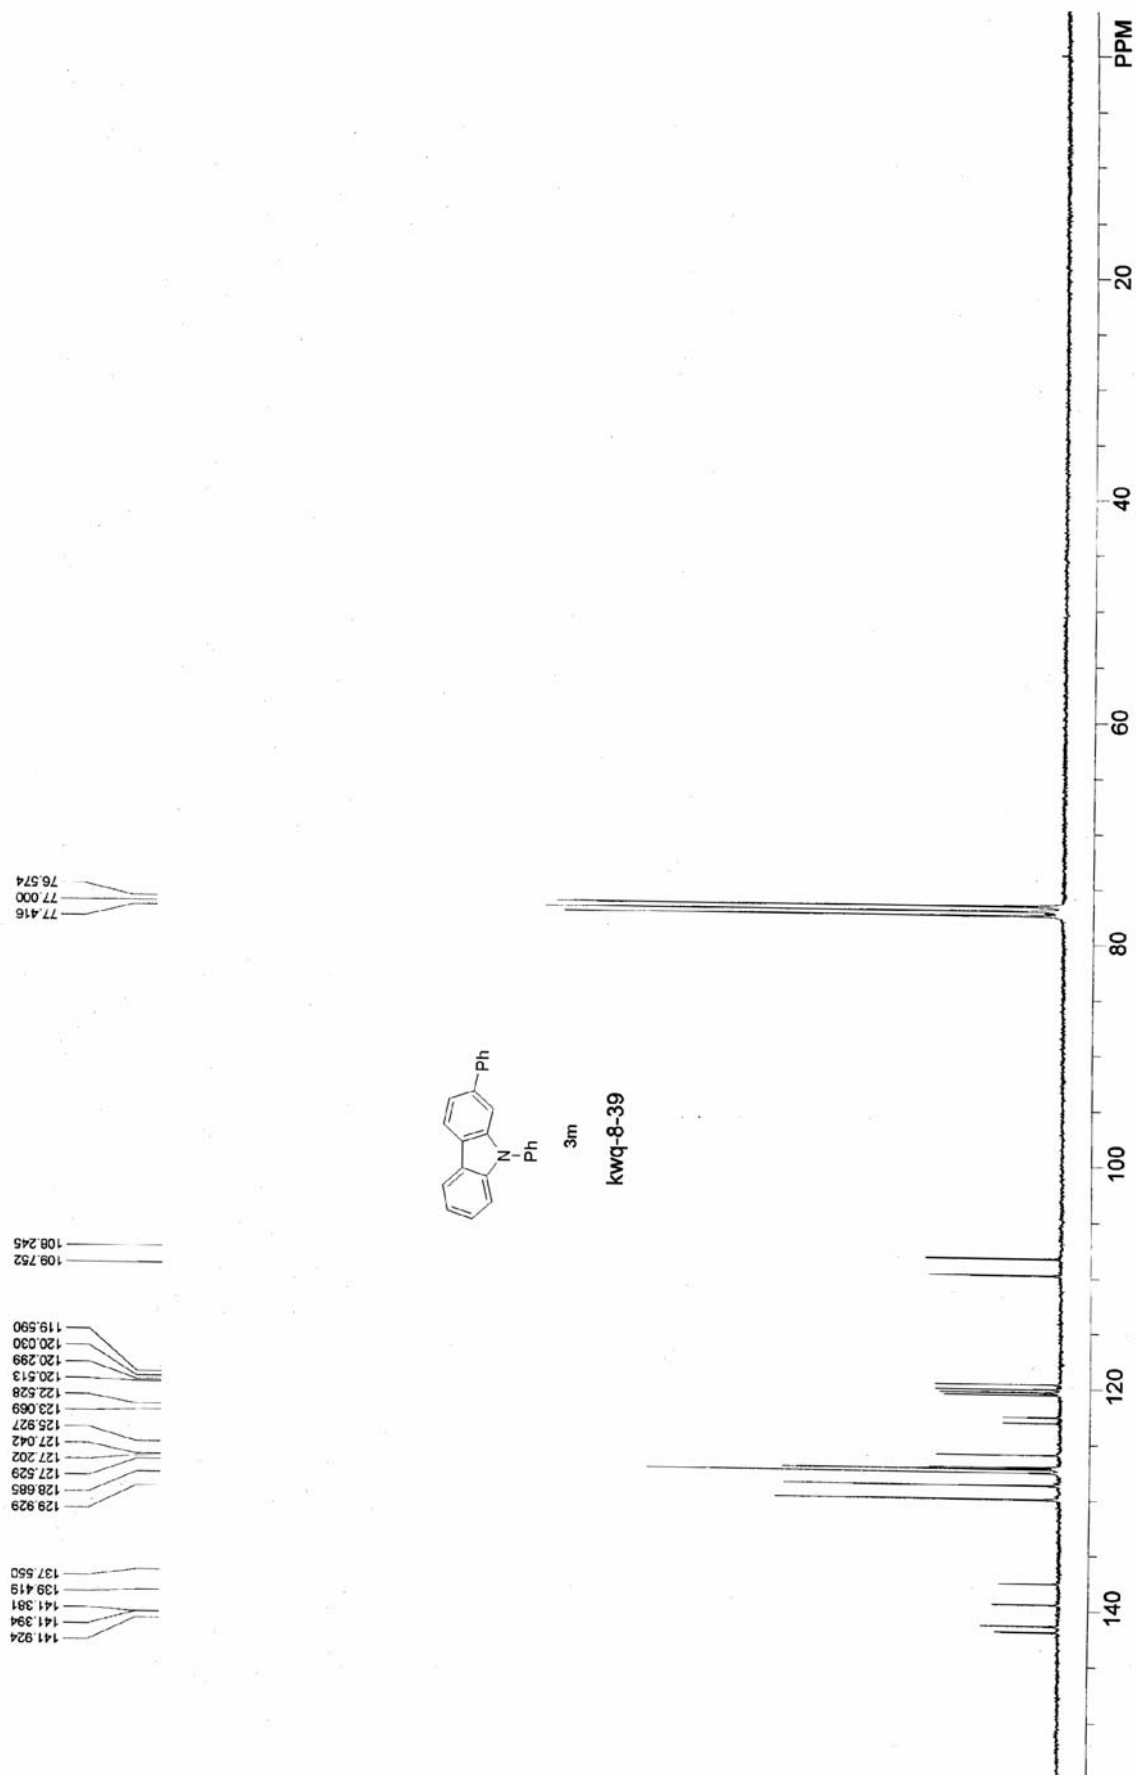

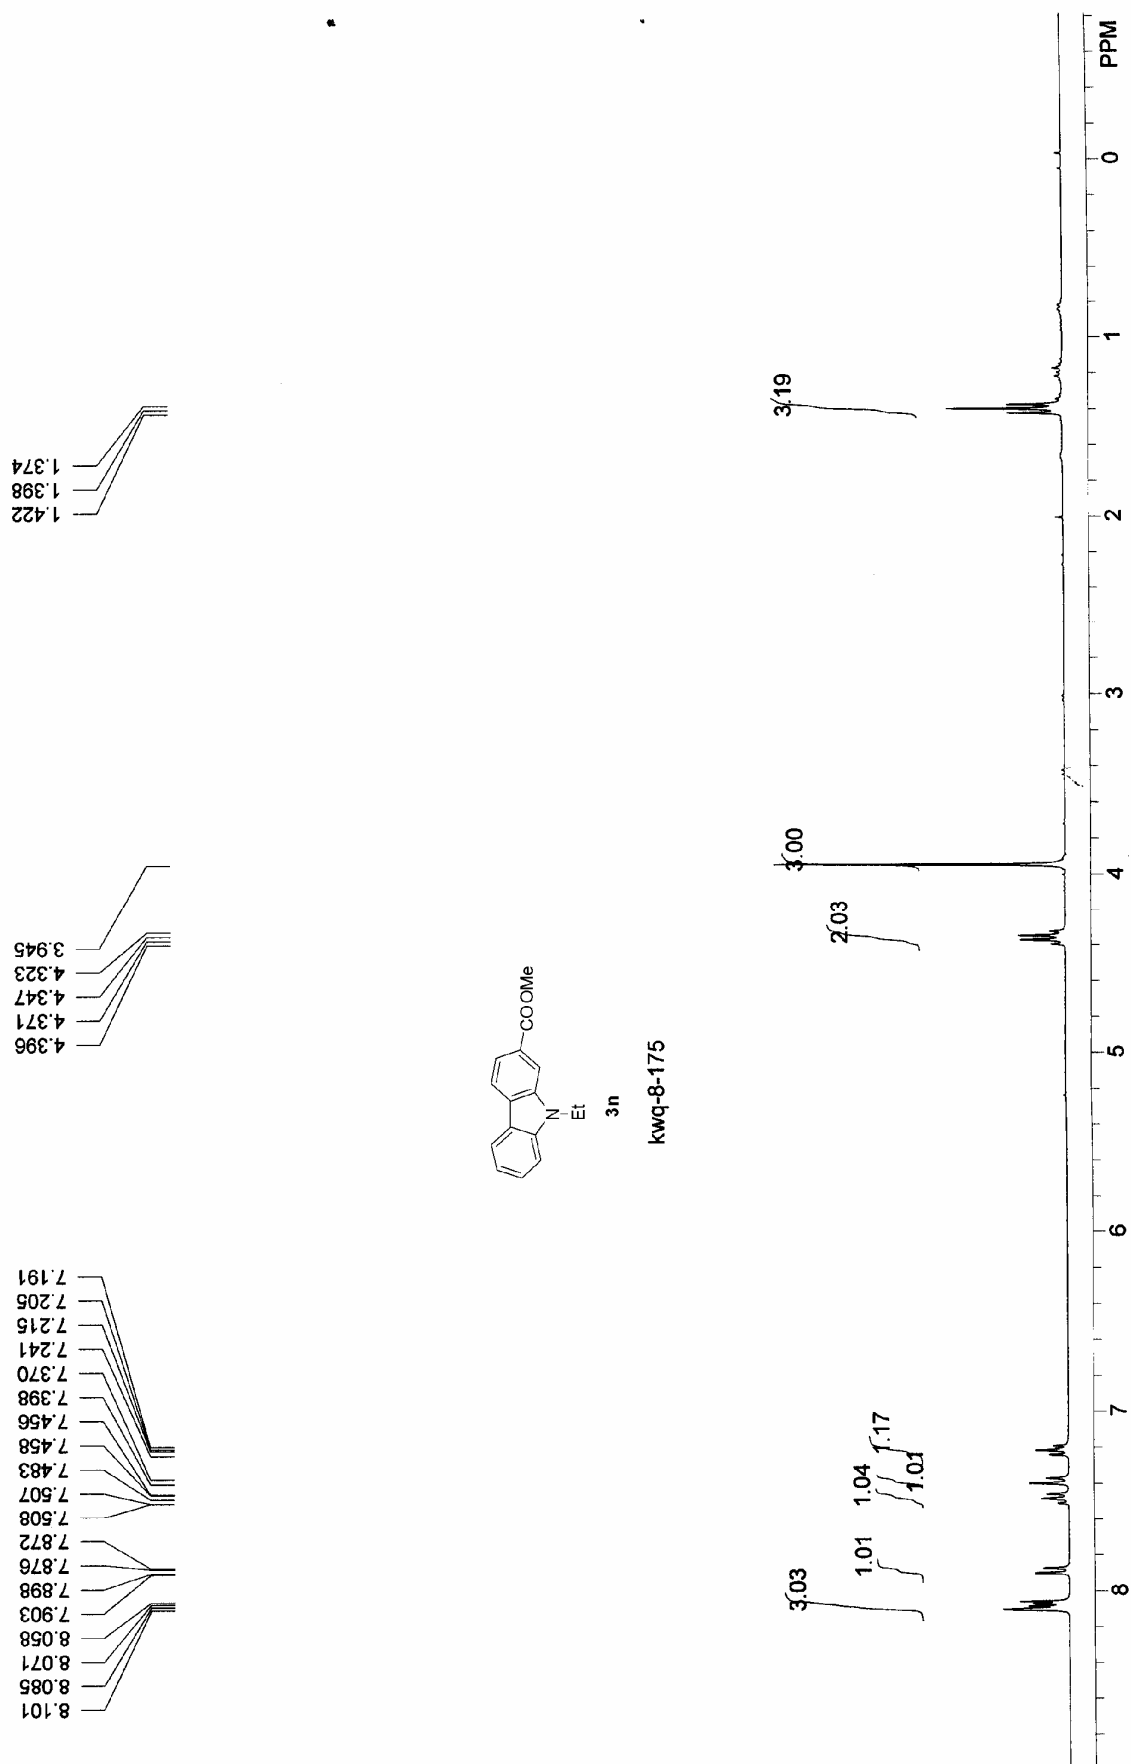

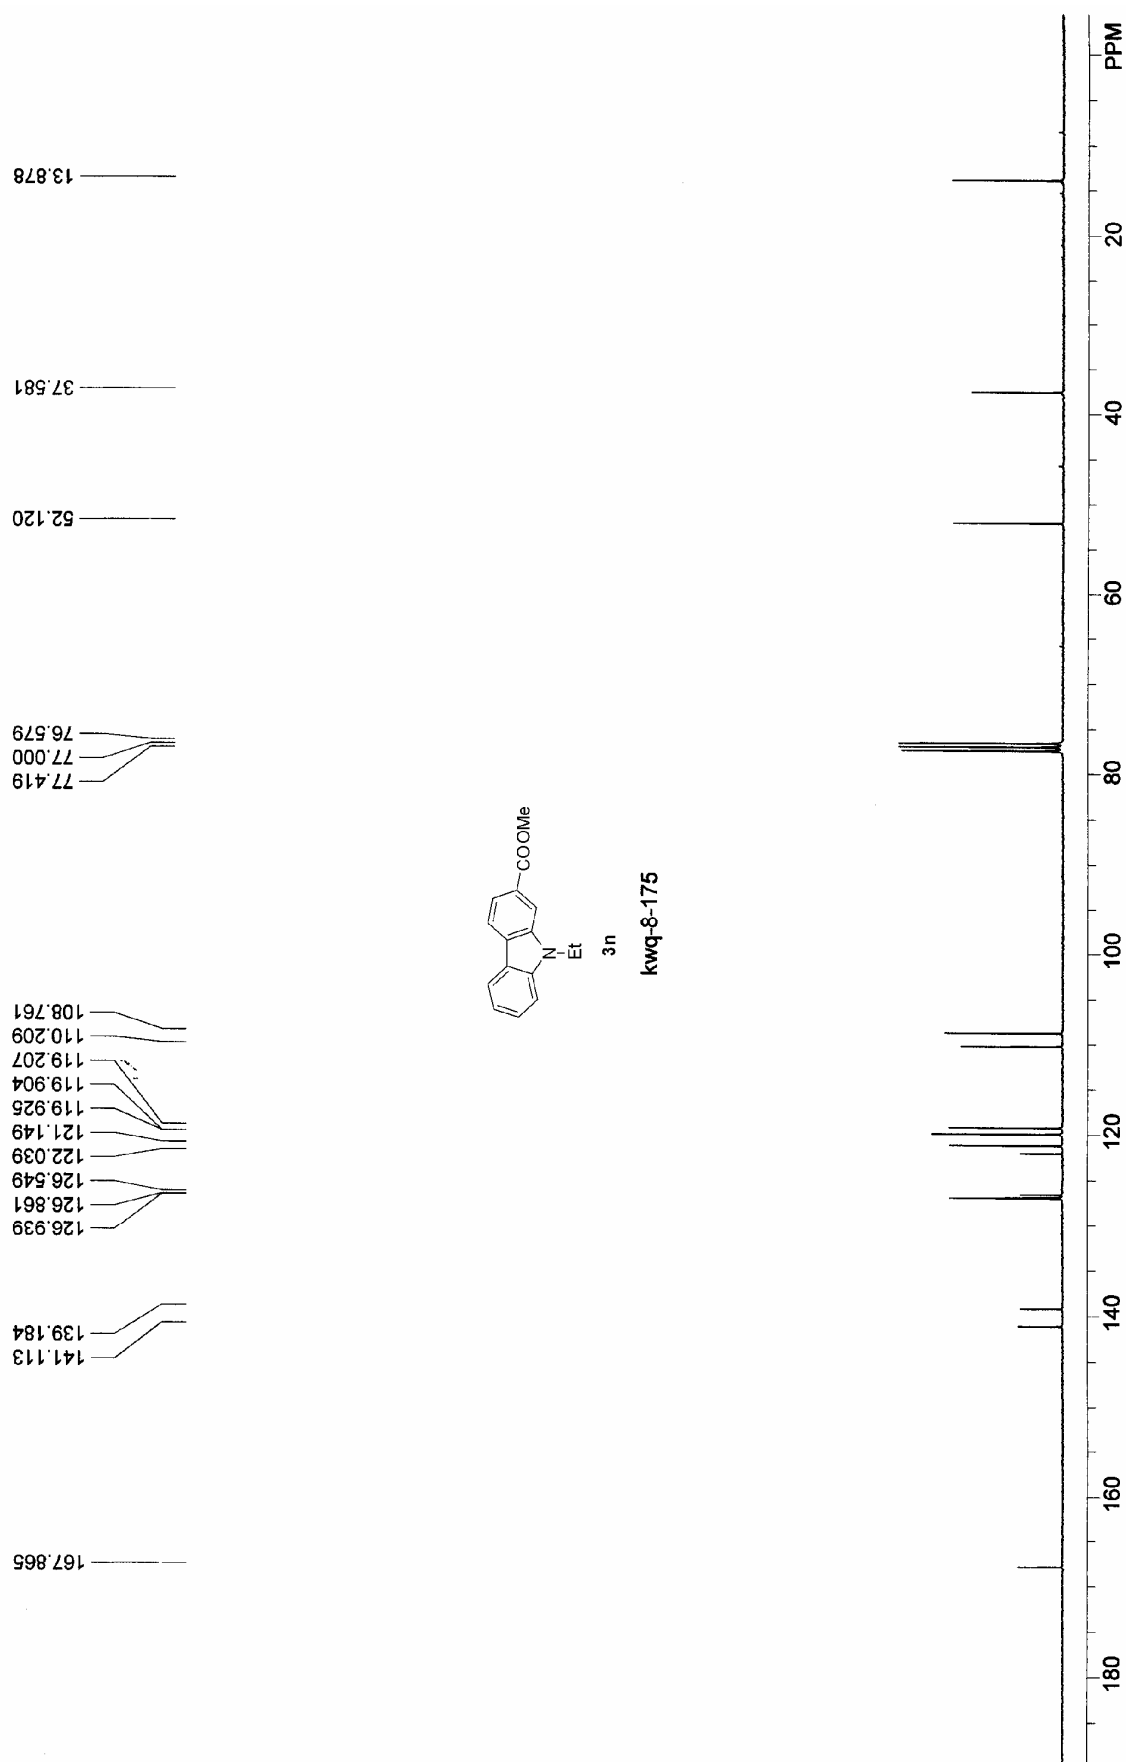

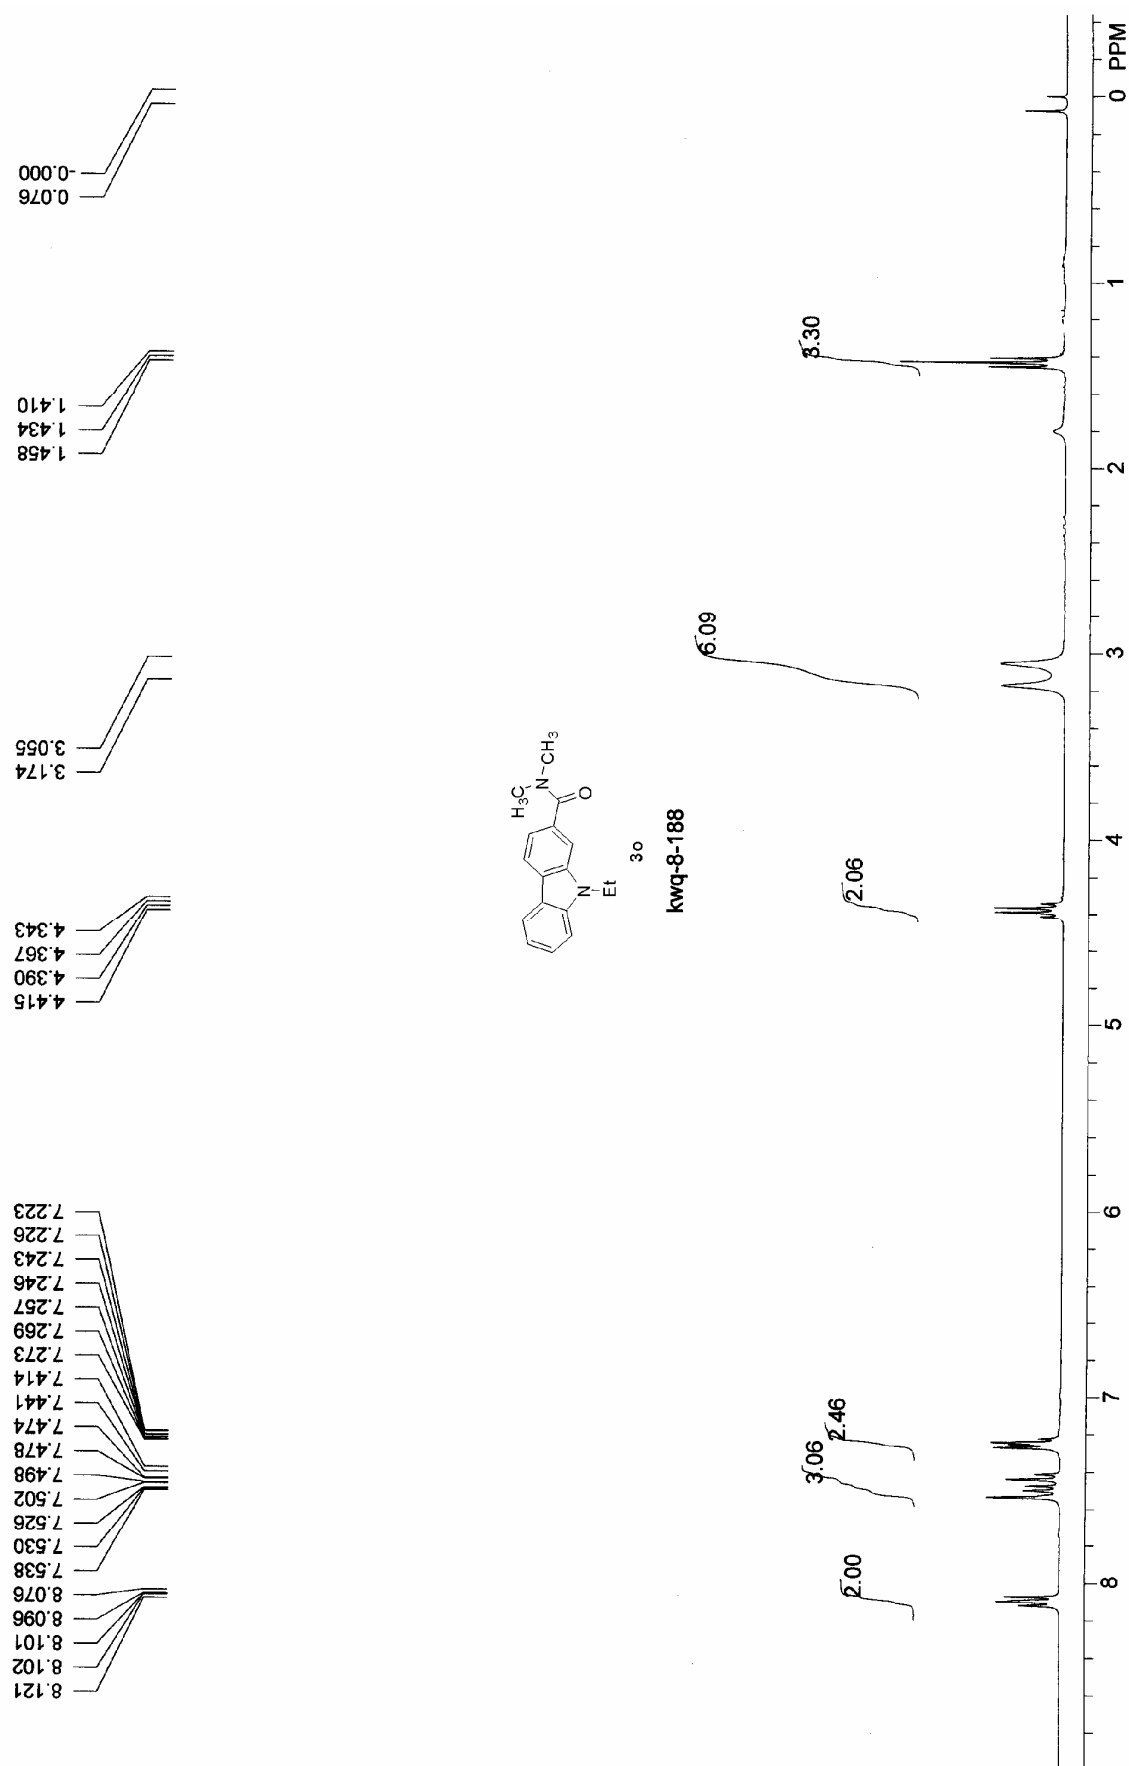

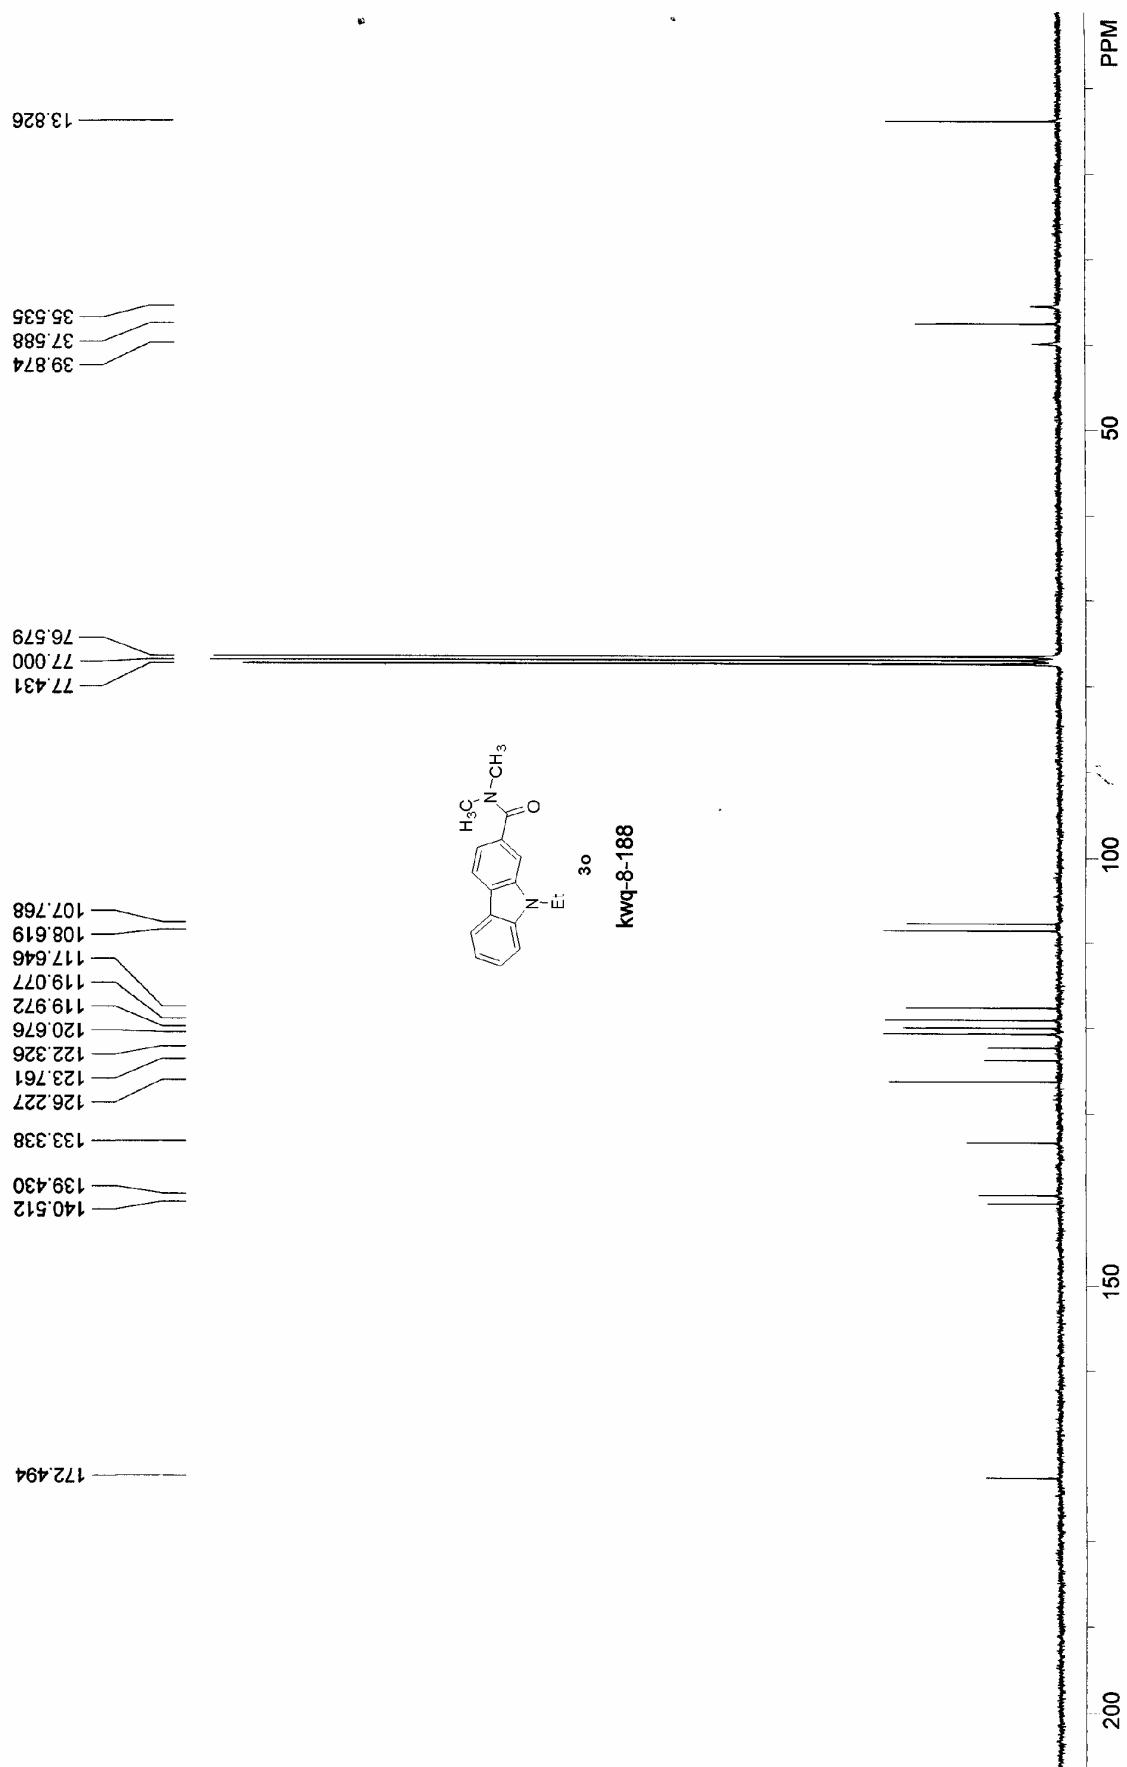

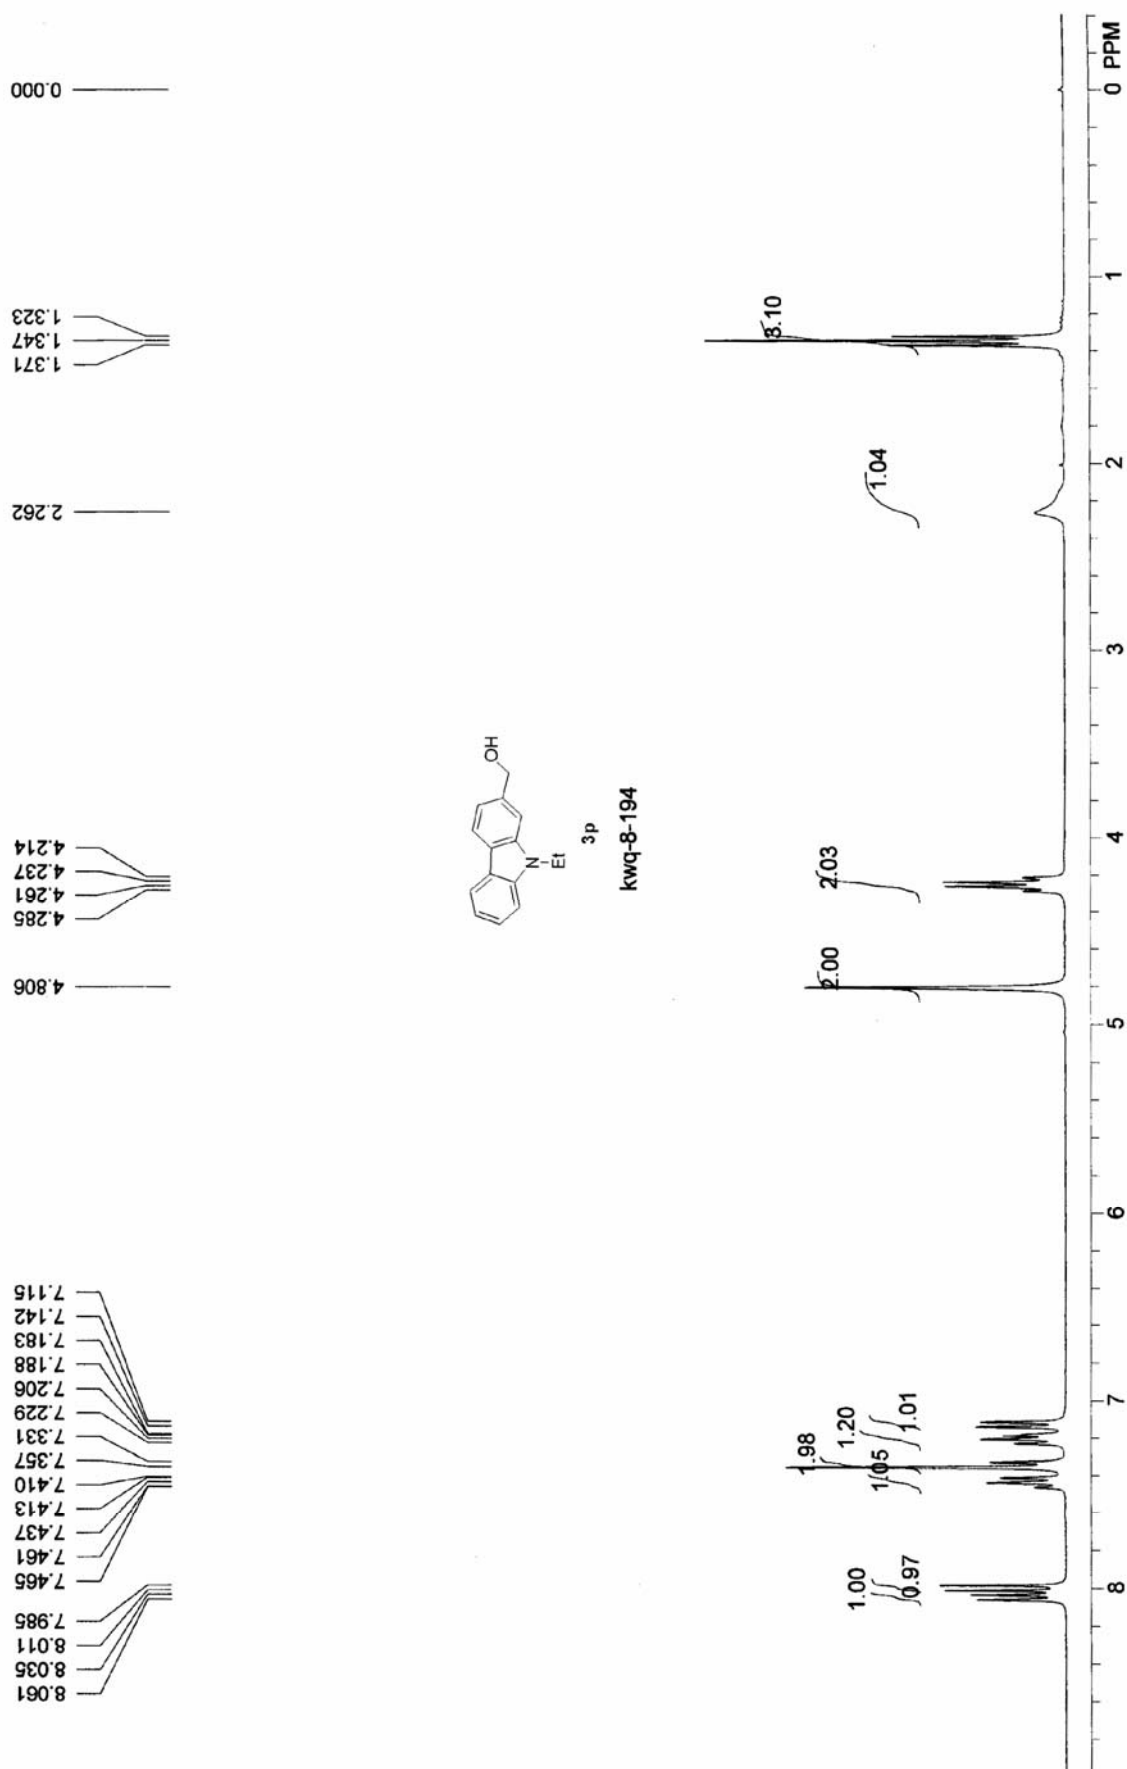

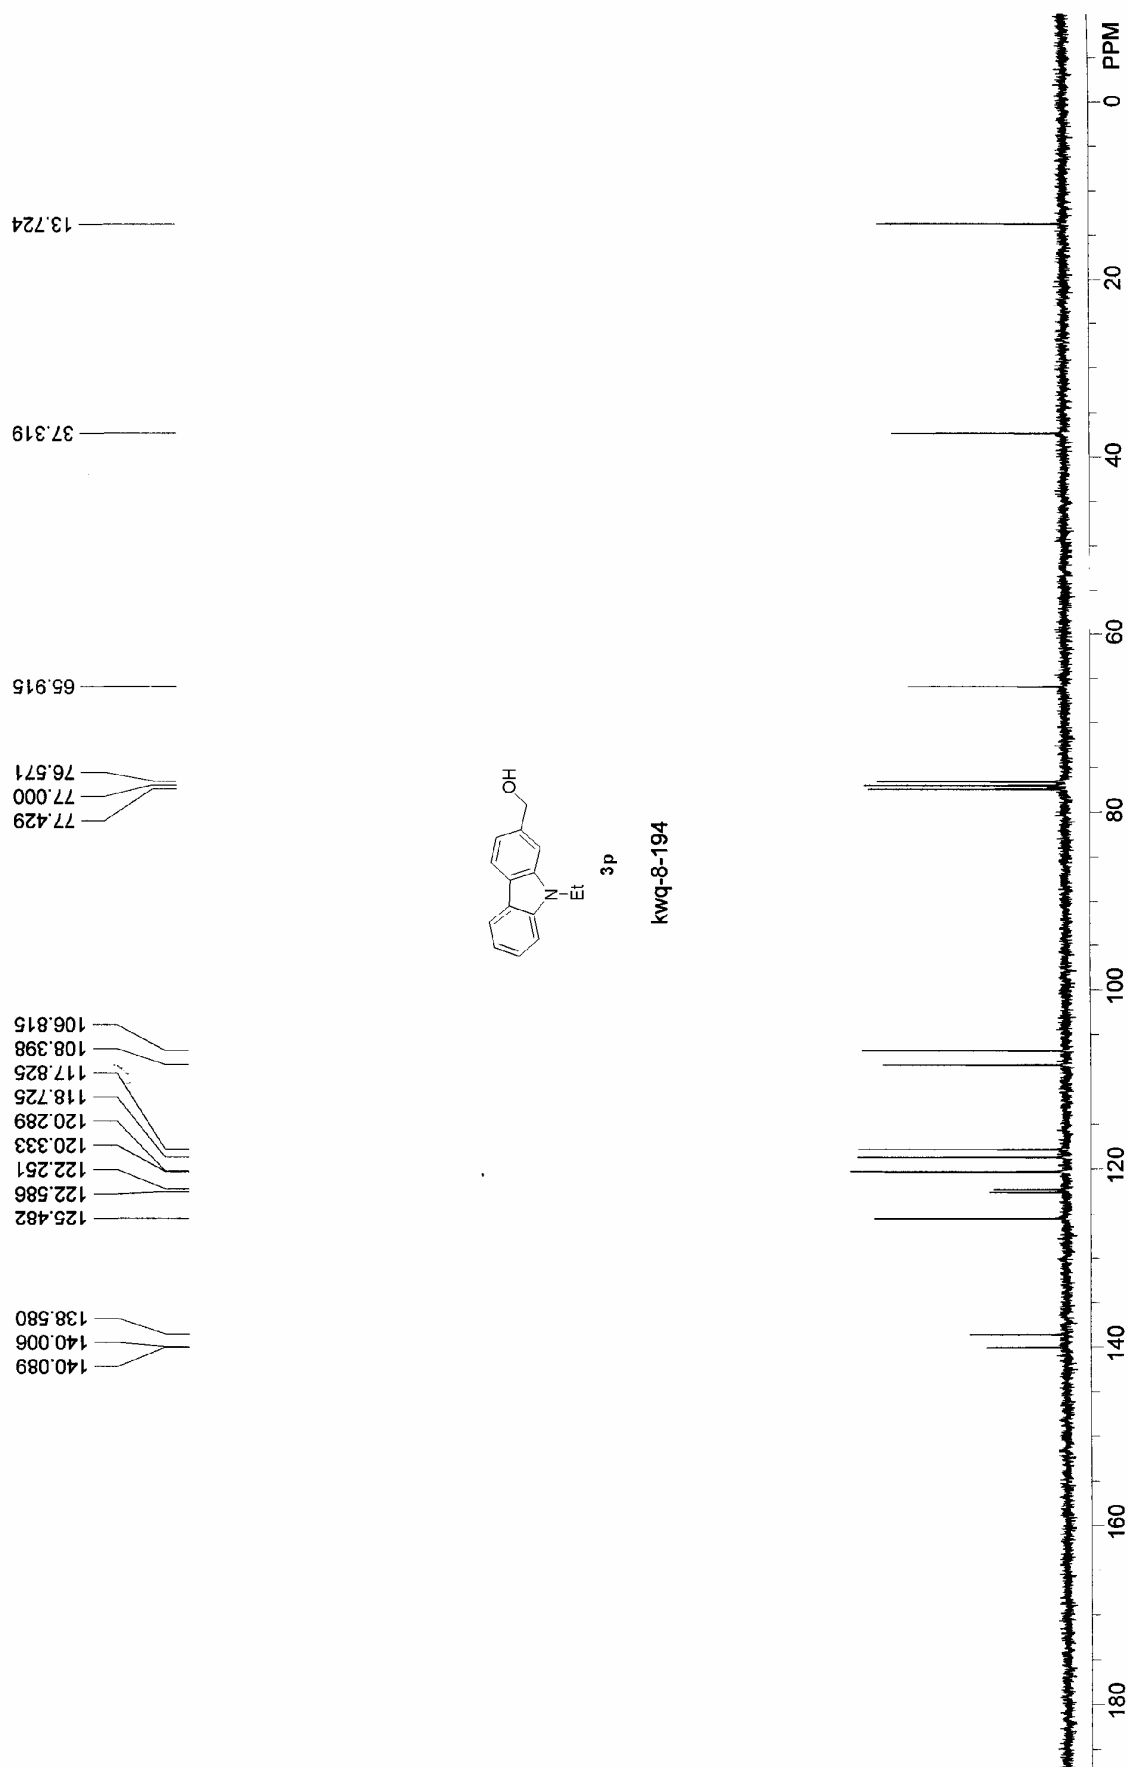

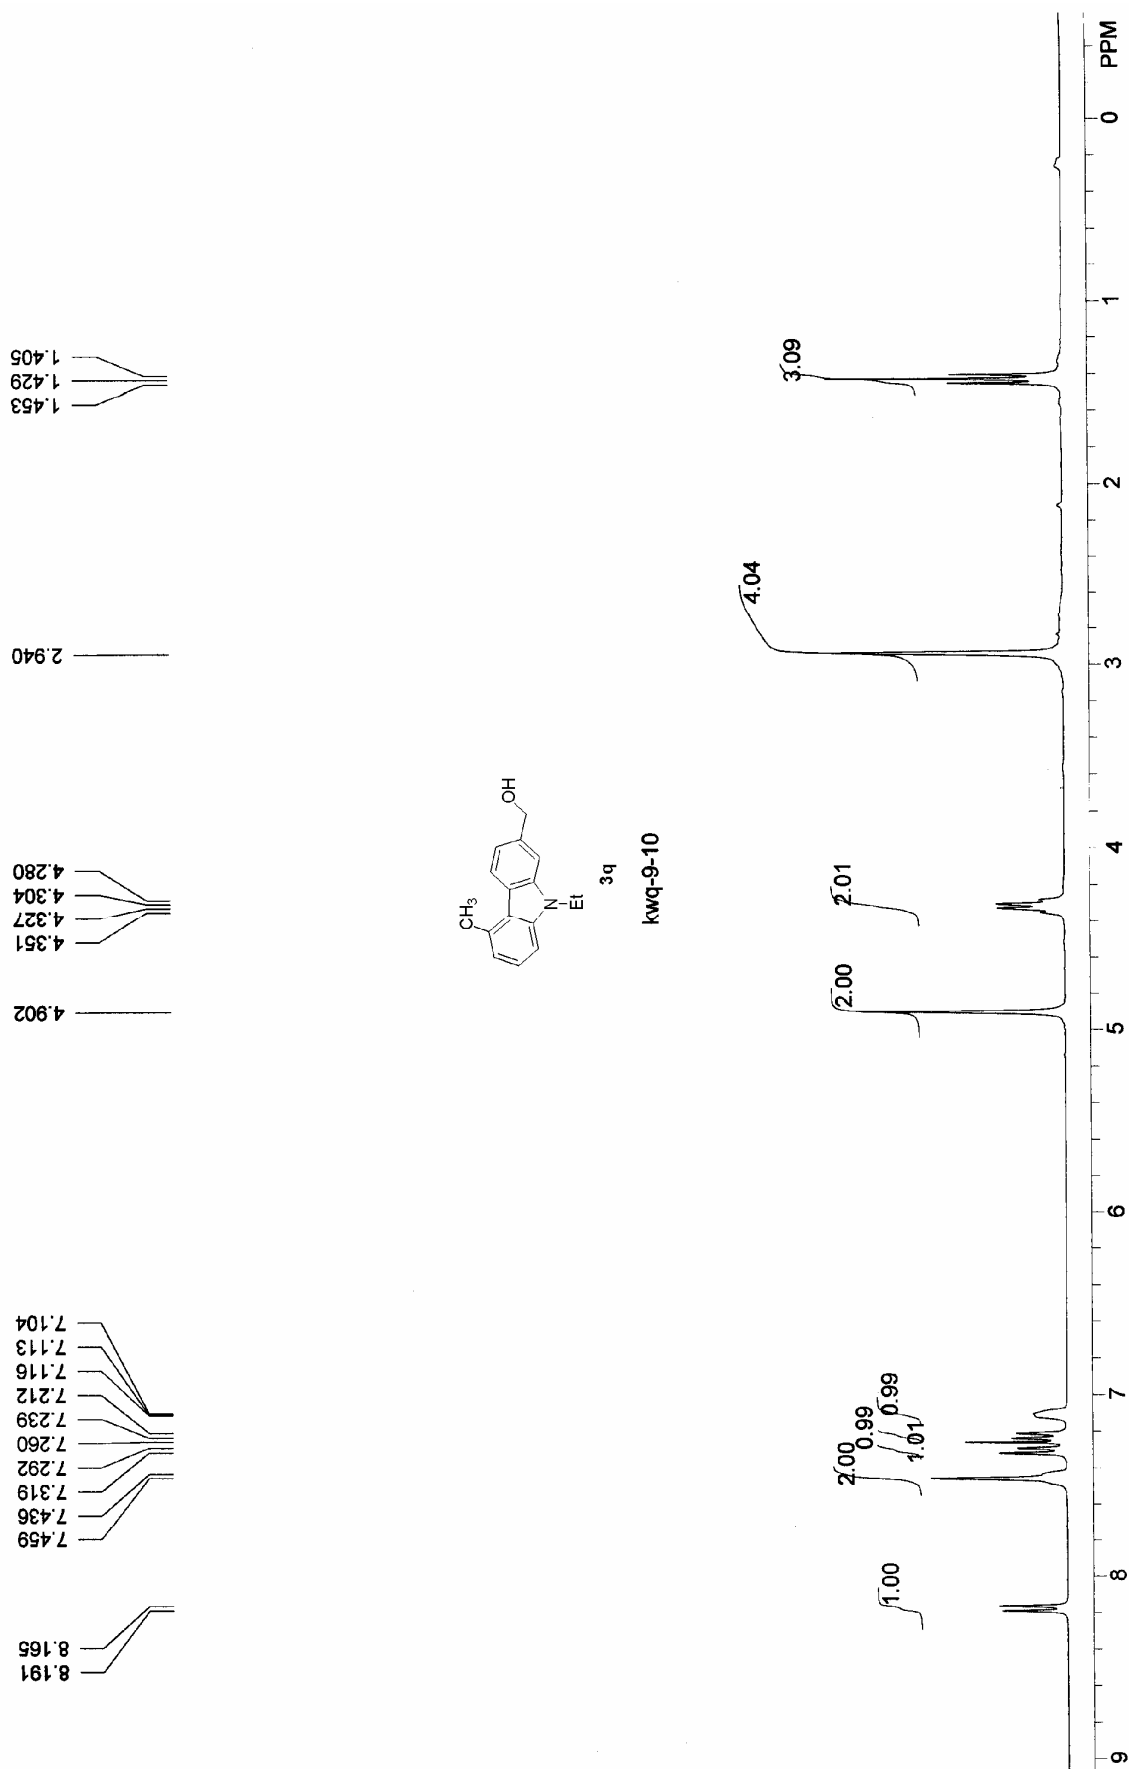

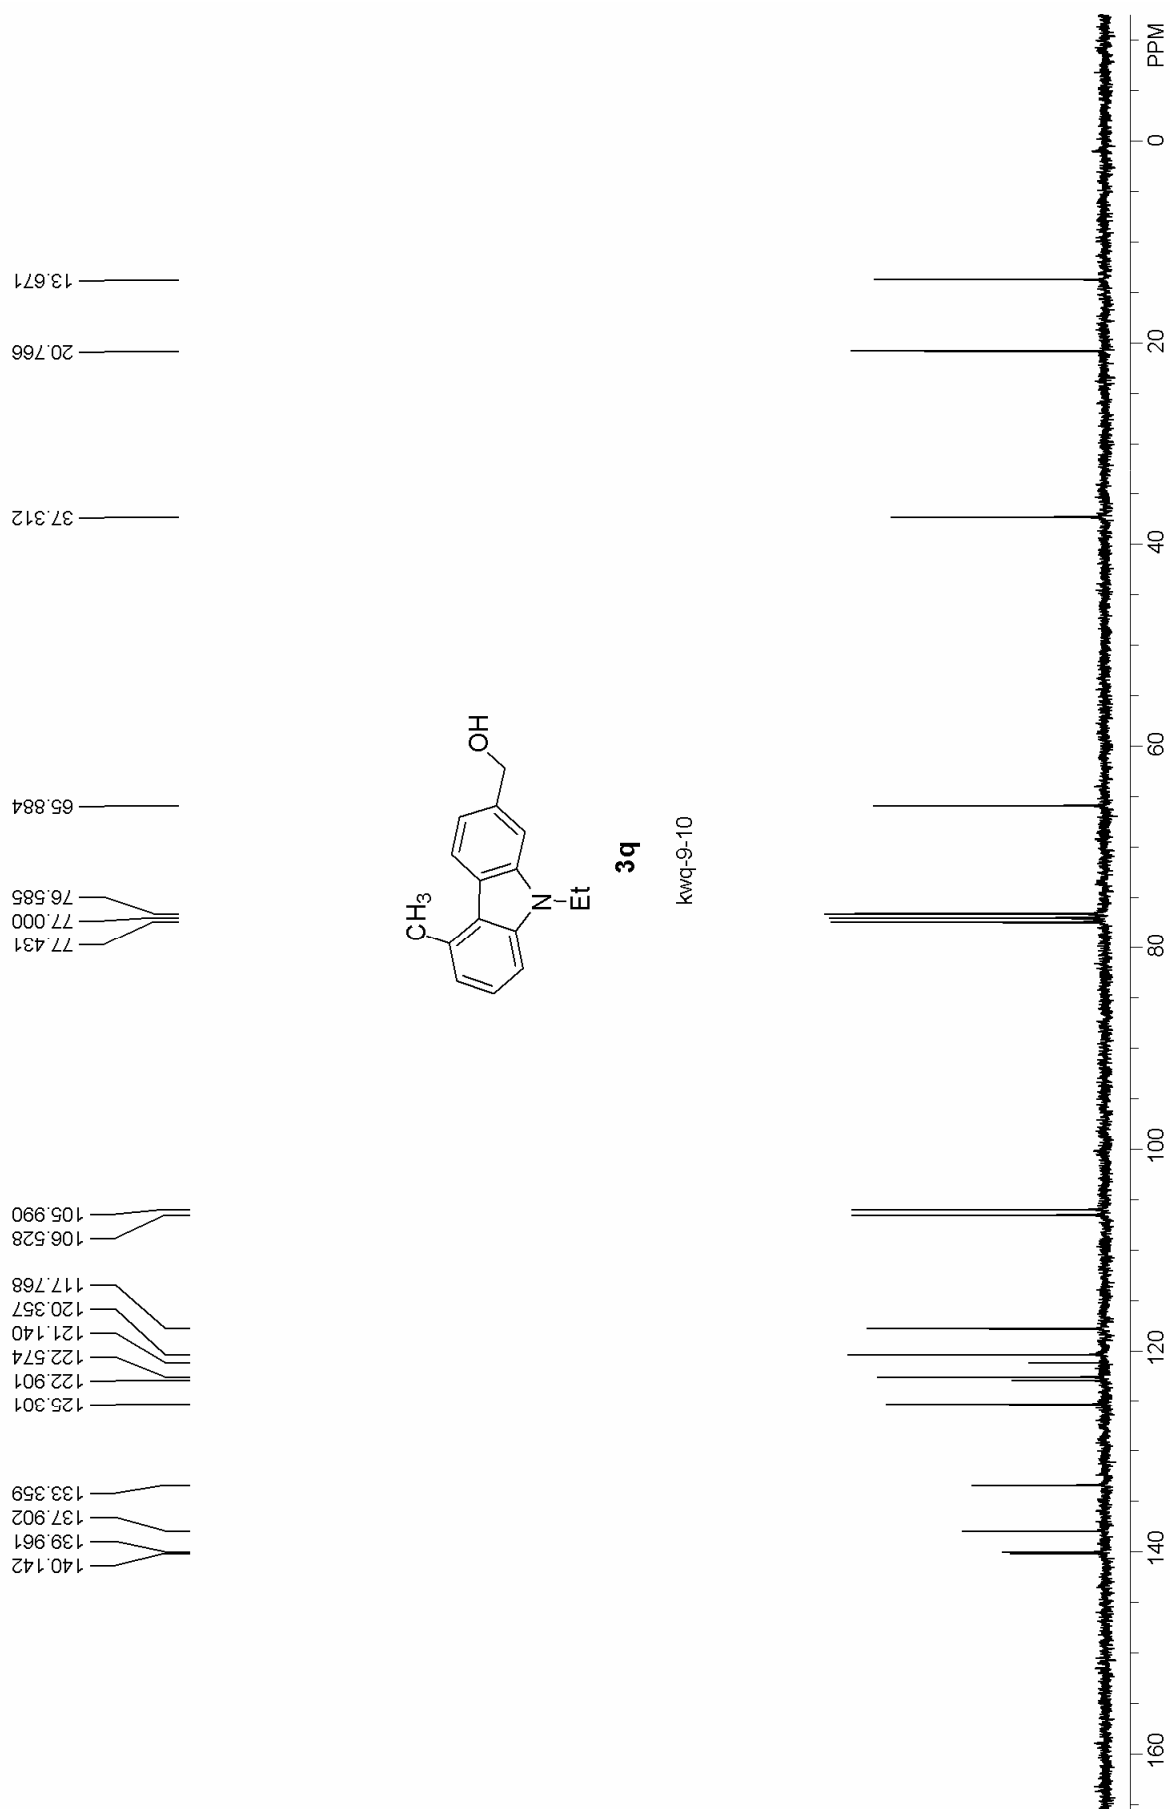

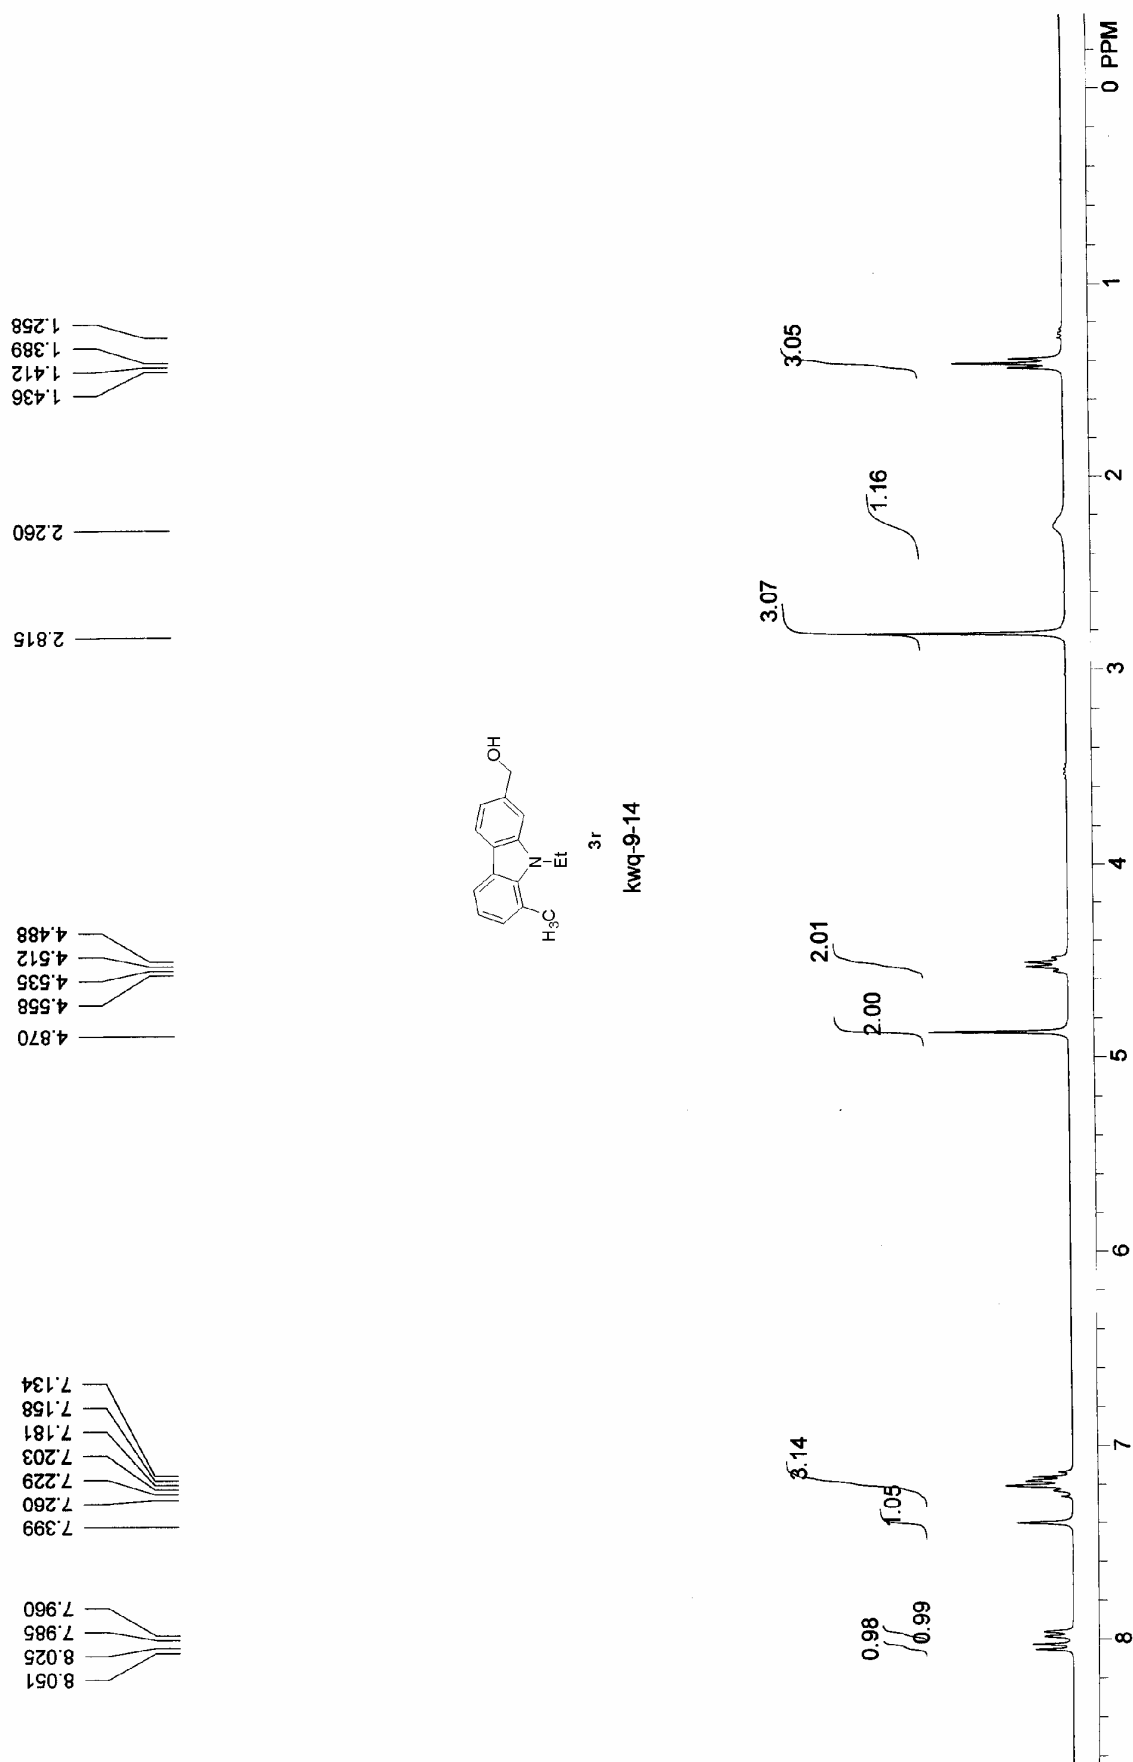

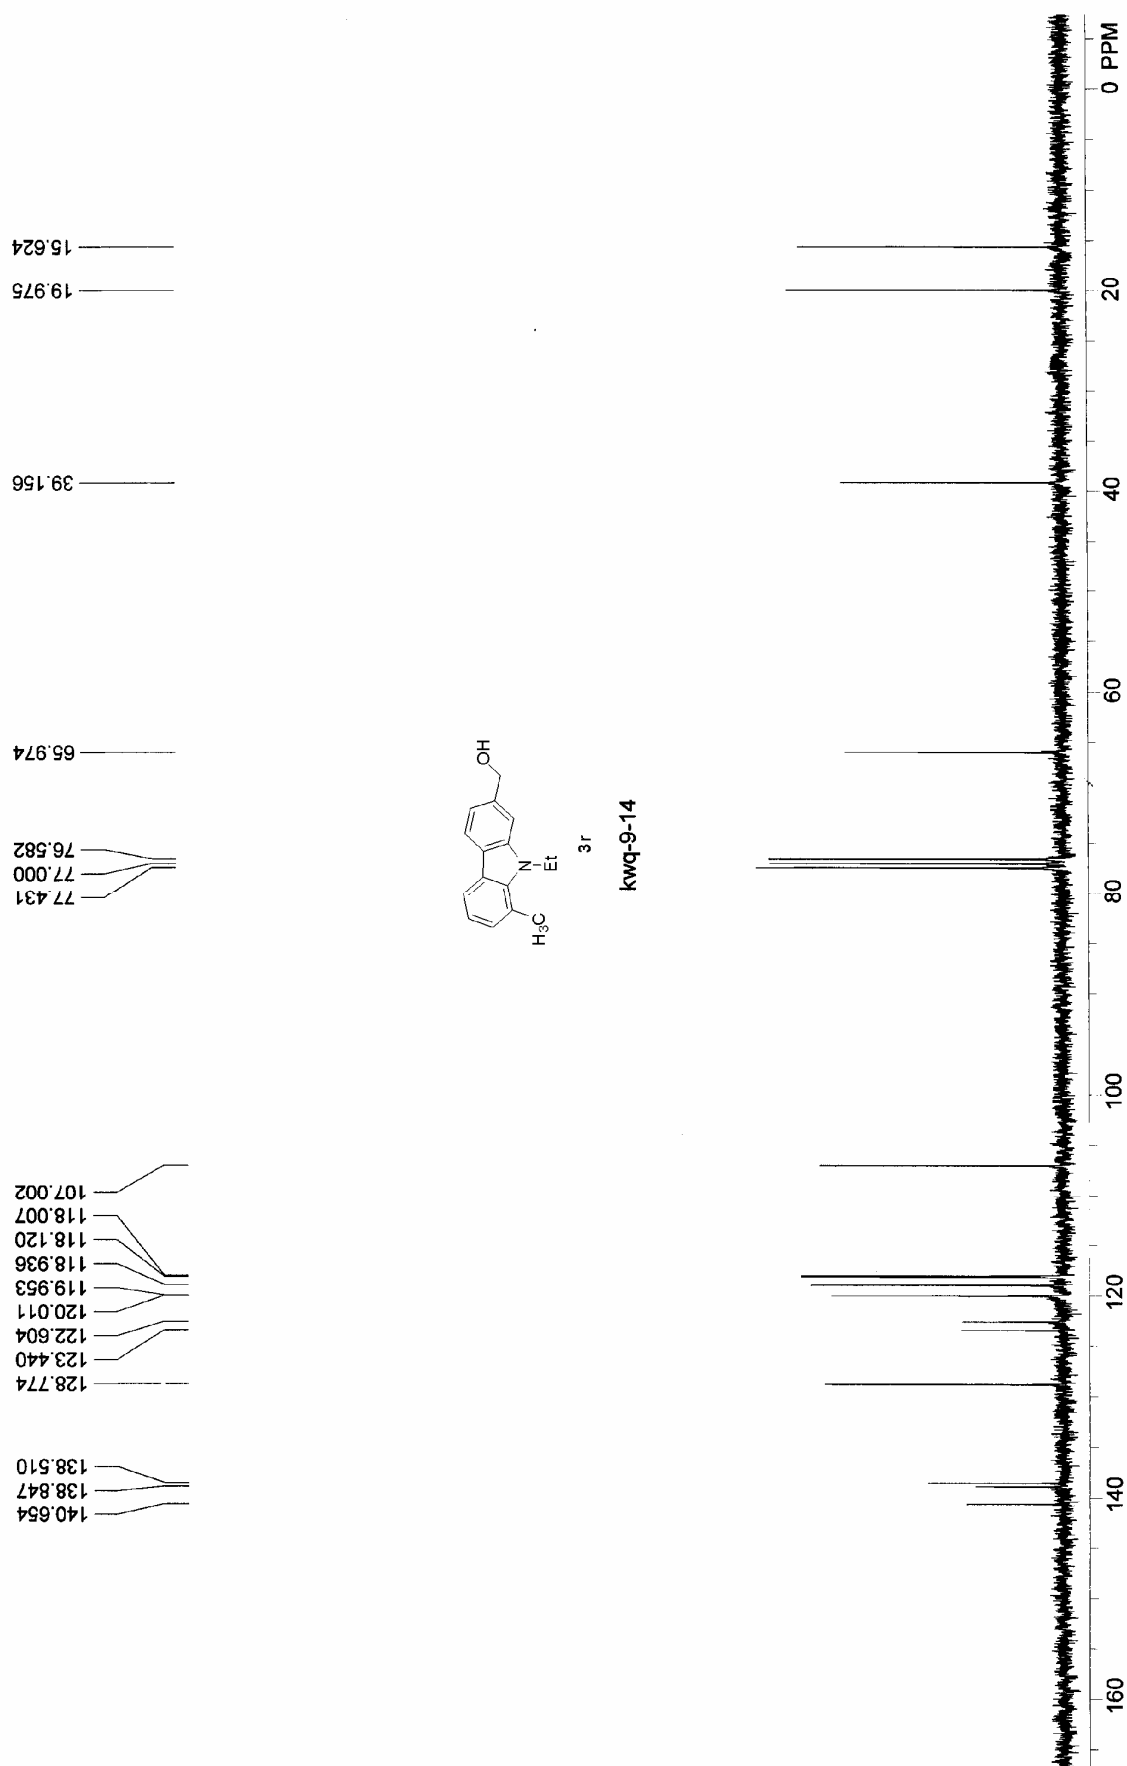

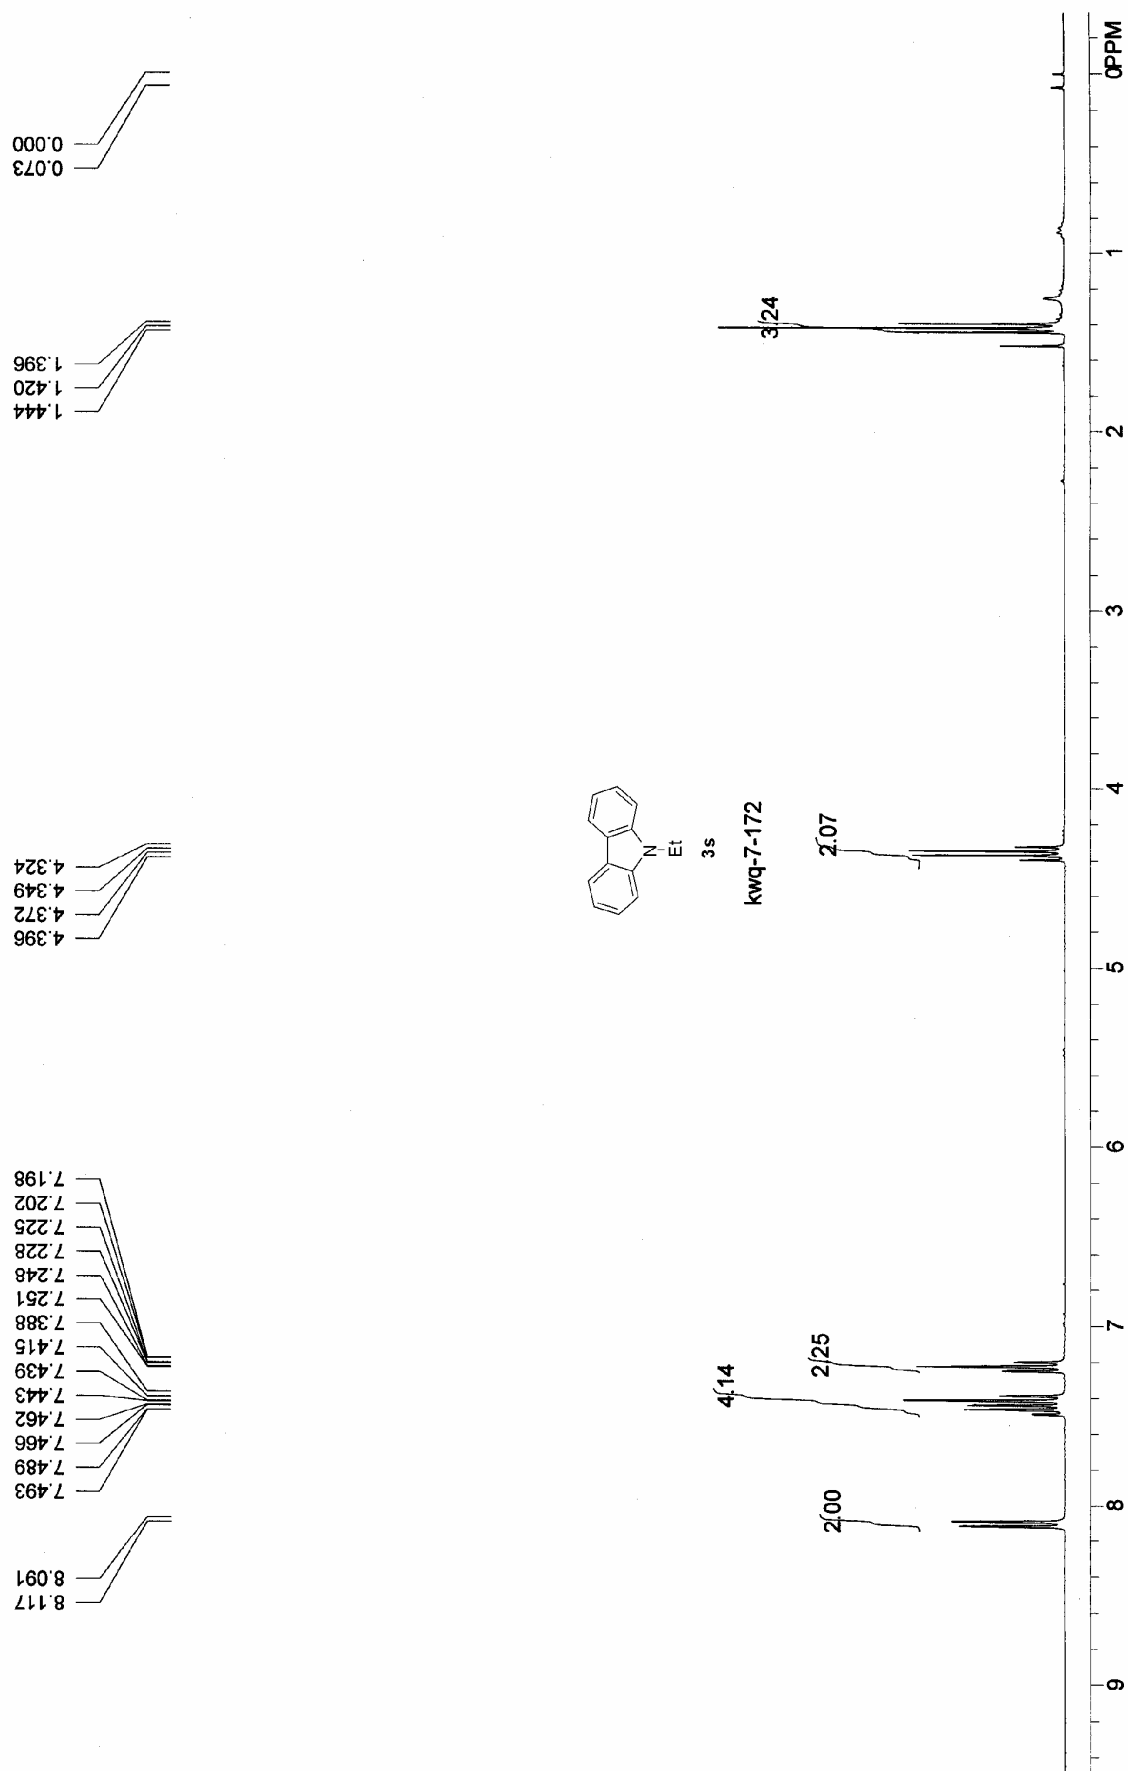

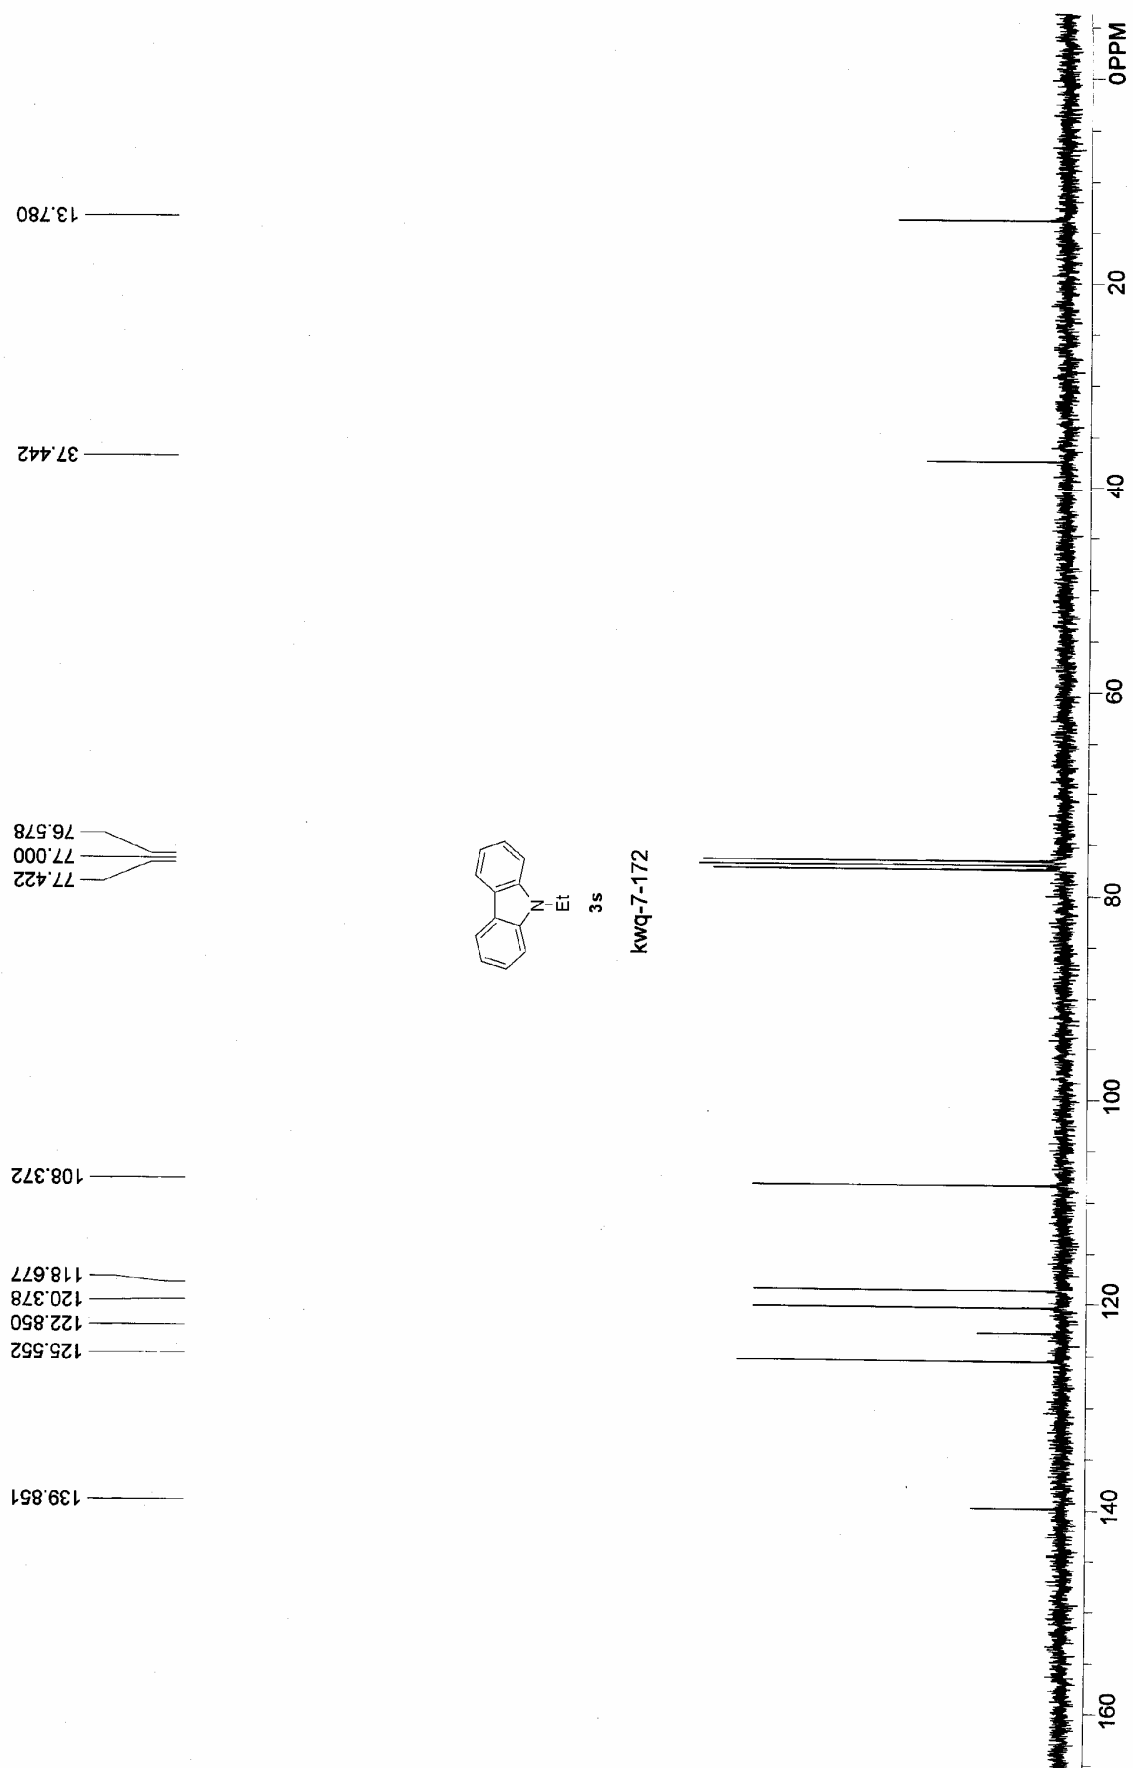

Supplement: b909649c.pdf [file b909649c.pdf]
